# Supplementary material for: Gut microbial dysbiosis in antibiotic treated Mystus cavasius using a combined culture-dependent and shotgun metagenomic approach
Source: Research Square preprint supplement (doi:10.21203/rs.3.rs-7024597/v1), 2025-07-21
Supplement: Supplementary file 1 [file 47ef1e03436197565e5fc7d1.docx]

**Supplementary Table S3.** Antibiotic sensitivity test of 26 bacterial isolates from the gut of experimental fish subjected to use of oxytetracycline. Sensitivity was assessed using the disc diffusion method with 30 µg OTC discs. Results are categorized as Sensitive, Intermediate, or Resistant based on zone of inhibition.

| Conditions | Bacterial strains | Sensitivity |
| --- | --- | --- |
| Control | *Enterobacter cloacae* | Sensitive |
| *Staphylococcus sciuri* | Sensitive |
| *Bacillus pumilus* | Sensitive |
| *Bacillus altitudinis* | Resistant |
| *Klebsiella pneumoniae* | Sensitive |
| *Escherichia coli* | Intermediate |
| *Bacillus tequilensis* | Resistant |
| *Bacillus atrophaeus* | Intermediate |
| *Bacillus amyloliquefaciens* | Resistant |
| *Enterobacter hormaechei* | Sensitive |
| Treatment | *Bacillus tequilensis* | Resistant |
| *Aeromonas sp.* | Resistant |
| *Aeromonas salmonicida* | Sensitive |
| *Aeromonas caviae* | Resistant |
| *Bacillus aerius* | Resistant |
| *Enterobacter sp.* | Resistant |
| *Enterobacter hormaechei* | Resistant |
| *Bacillus subtilis* | Resistant |
| *Bacillus pumilus* | Resistant |
| *Bacillus thuringiensis* | Sensitive |
| *Bacillus cereus* | Sensitive |
| *Bacillus toyonensis* | Sensitive |
| *Enterobacter cloacae* | Resistant |
| *Bacillus sp* | Resistant |
| *Bacillus thuringiensis* | Resistant |
| *Streptococcus sp.* | Resistant |
