# Supplementary material for: Gut microbial dysbiosis in antibiotic treated Mystus cavasius using a combined culture-dependent and shotgun metagenomic approach
Source: Research Square preprint supplement (doi:10.21203/rs.3.rs-7024597/v1), 2025-07-21
Supplement: Supplementary file 2 [file 4b166efec093cf671637565d.docx]

**Supplementary Table S2.** Twelve (12) bacterial isolates with their accession numbers, species name, base pair, query coverages and conditions.

| **SN** | **Accession No.** | **Species Name** | **Amplified Base** | **NCBI Matching (%)** | **Conditions** |
| --- | --- | --- | --- | --- | --- |
|  | PV810321 | *Bacillus altitudinis* | 663 | 93% | Control |
|  | PV810322 | *Enterobacter cloacae* | 722 | 92% | Treatment |
|  | PV810323 | *Bacillus thuringiensis* | 1028 | 93.38% | Treatment |
|  | PV809930 | *Enterobacter sp.* | 912 | 95% | Treatment |
|  | PV809931 | *Enterobacter hormaechei* | 497 | 93% | Treatment |
|  | PV809932 | *Aeromonas caviae* | 978 | 98% | Treatment |
|  | PV809933 | *Aeromonas hydrophila* | 968 | 98% | Treatment |
|  | PV809934 | *Bacillus toyonensis* | 836 | 96% | Treatment |
|  | PV809935 | *Enterobacter hormaechei* | 946 | 97.03% | Control |
|  | PV809936 | *Cronobacter sakazakii* | 370 | 92.54% | Treatment |
|  | PV809937 | *Bacillus sp* | 1008 | 97.89% | Treatment |
|  | PV809938 | *Bacillus thuringiensis* | 1022 | 96.73% | Treatment |
