# Supplementary material for: Gut microbial dysbiosis in antibiotic treated Mystus cavasius using a combined culture-dependent and shotgun metagenomic approach
Source: Research Square preprint supplement (doi:10.21203/rs.3.rs-7024597/v1), 2025-07-21
Supplement: Supplementary file 3 [file d929d3969d9c180bd560d47e.xlsx]

## Sheet: Read Counts & Taxonomy
Supplementary Table S4A. Species-level read counts and taxonomic classification of bacterial OTUs in control and treatment samples.
OTU ID	CR1	CR2	TR1	TR2	TR3	Taxonomy
33932	113	12	79	11	71	k__Bacteria; p__Firmicutes; c__Bacilli; o__Bacillales; f__Bacillaceae; g__Bacillus; s__cohnii
1496	5	4	3	1	2	k__Bacteria; p__Firmicutes; c__Clostridia; o__Eubacteriales; f__Peptostreptococcaceae; g__Clostridioides; s__difficile
1485	8	3	26	2	7	k__Bacteria; p__Firmicutes; c__Clostridia; o__Eubacteriales; f__Clostridiaceae; g__Clostridium; s__
9	16	3	12	1	8	k__Bacteria; p__Proteobacteria; c__Gammaproteobacteria; o__Enterobacterales; f__Erwiniaceae; g__Buchnera; s__aphidicola
642	8	3	2	1	2	k__Bacteria; p__Proteobacteria; c__Gammaproteobacteria; o__Aeromonadales; f__Aeromonadaceae; g__Aeromonas; s__
1502	5	3	15	1	1	k__Bacteria; p__Firmicutes; c__Clostridia; o__Eubacteriales; f__Clostridiaceae; g__Clostridium; s__perfringens
2023057	0	3	1	1	1	k__Viruses; p__Nucleocytoviricota; c__Megaviricetes; o__Algavirales; f__Phycodnaviridae; g__; s__Orpheovirus IHUMI-LCC2
2748320	13	3	10	0	8	k__Bacteria; p__Bacteroidetes; c__Flavobacteriia; o__Flavobacteriales; f__Flavobacteriaceae; g__Flavobacterium; s__sp. P2-65
258	1	3	1	0	2	k__Bacteria; p__Bacteroidetes; c__Sphingobacteriia; o__Sphingobacteriales; f__Sphingobacteriaceae; g__Sphingobacterium; s__spiritivorum
1094892	1	3	2	0	0	k__Viruses; p__Nucleocytoviricota; c__Megaviricetes; o__Imitervirales; f__Mimiviridae; g__Mimivirus; s__Megavirus chiliensis
135622	0	3	0	0	0	k__Bacteria; p__Proteobacteria; c__Gammaproteobacteria; o__Alteromonadales; f__; g__; s__
703	6	2	650	11	83	k__Bacteria; p__Proteobacteria; c__Gammaproteobacteria; o__Enterobacterales; f__; g__Plesiomonas; s__shigelloides
34062	13	2	0	6	24	k__Bacteria; p__Proteobacteria; c__Gammaproteobacteria; o__Pseudomonadales; f__Moraxellaceae; g__Moraxella; s__osloensis
562	3	2	4	2	1	k__Bacteria; p__Proteobacteria; c__Gammaproteobacteria; o__Enterobacterales; f__Enterobacteriaceae; g__Escherichia; s__coli
1501	3	2	1	1	0	k__Bacteria; p__Firmicutes; c__Clostridia; o__Eubacteriales; f__Clostridiaceae; g__Clostridium; s__pasteurianum
91347	5	2	27	0	6	k__Bacteria; p__Proteobacteria; c__Gammaproteobacteria; o__Enterobacterales; f__; g__; s__
851	5	2	6	0	5	k__Bacteria; p__Fusobacteria; c__Fusobacteriia; o__Fusobacteriales; f__Fusobacteriaceae; g__Fusobacterium; s__nucleatum
59732	7	2	1	0	4	k__Bacteria; p__Bacteroidetes; c__Flavobacteriia; o__Flavobacteriales; f__Weeksellaceae; g__Chryseobacterium; s__
1206	2	2	1	0	3	k__Bacteria; p__Cyanobacteria; c__; o__Oscillatoriales; f__Microcoleaceae; g__Trichodesmium; s__erythraeum
1520	5	2	2	0	3	k__Bacteria; p__Firmicutes; c__Clostridia; o__Eubacteriales; f__Clostridiaceae; g__Clostridium; s__beijerinckii
2151	0	2	2	0	2	k__Bacteria; p__Tenericutes; c__Mollicutes; o__Entomoplasmatales; f__Entomoplasmataceae; g__Mesoplasma; s__florum
28198	2	2	1	0	1	k__Bacteria; p__Proteobacteria; c__Epsilonproteobacteria; o__Campylobacterales; f__Campylobacteraceae; g__Aliarcobacter; s__cryaerophilus
996	2	2	3	0	1	k__Bacteria; p__Bacteroidetes; c__Flavobacteriia; o__Flavobacteriales; f__Flavobacteriaceae; g__Flavobacterium; s__columnare
2487065	1	2	0	0	1	k__Bacteria; p__Bacteroidetes; c__Flavobacteriia; o__Flavobacteriales; f__Weeksellaceae; g__Chryseobacterium; s__sp. G0201
28072	0	2	0	0	1	k__Bacteria; p__Cyanobacteria; c__; o__Nostocales; f__Nostocaceae; g__Nostoc; s__sp. PCC 7524
1513	2	2	3	0	0	k__Bacteria; p__Firmicutes; c__Clostridia; o__Eubacteriales; f__Clostridiaceae; g__Clostridium; s__tetani
573	1	2	1	0	0	k__Bacteria; p__Proteobacteria; c__Gammaproteobacteria; o__Enterobacterales; f__Enterobacteriaceae; g__Klebsiella; s__pneumoniae
1235990	3	2	0	0	0	k__Bacteria; p__Proteobacteria; c__Gammaproteobacteria; o__Enterobacterales; f__Erwiniaceae; g__Pantoea; s__Candidatus Pantoea carbekii
668	1	2	1	0	0	k__Bacteria; p__Proteobacteria; c__Gammaproteobacteria; o__Vibrionales; f__Vibrionaceae; g__Aliivibrio; s__fischeri
2303332	11	2	3	0	0	k__Bacteria; p__Proteobacteria; c__Gammaproteobacteria; o__Cellvibrionales; f__Cellvibrionaceae; g__Cellvibrio; s__sp. KY-GH-1
2686077	1	2	1	0	0	k__Bacteria; p__Bacteroidetes; c__Flavobacteriia; o__Flavobacteriales; f__Flavobacteriaceae; g__Winogradskyella; s__forsetii
254	1	2	3	0	0	k__Bacteria; p__Bacteroidetes; c__Flavobacteriia; o__Flavobacteriales; f__Weeksellaceae; g__Chryseobacterium; s__indoltheticum
1307	0	2	2	0	0	k__Bacteria; p__Firmicutes; c__Bacilli; o__Lactobacillales; f__Streptococcaceae; g__Streptococcus; s__suis
641107	0	2	0	0	0	k__Bacteria; p__Firmicutes; c__Clostridia; o__Eubacteriales; f__Clostridiaceae; g__Clostridium; s__sp. DL-VIII
2546366	0	2	0	0	0	k__Bacteria; p__Cyanobacteria; c__; o__Chroococcales; f__Aphanothecaceae; g__Rippkaea; s__orientalis
630	0	2	2	0	0	k__Bacteria; p__Proteobacteria; c__Gammaproteobacteria; o__Enterobacterales; f__Yersiniaceae; g__Yersinia; s__enterocolitica
1630406	0	2	0	0	0	k__Bacteria; p__Bacteroidetes; c__Flavobacteriia; o__Flavobacteriales; f__Flavobacteriaceae; g__Tamlana; s__sp. s12
2201271	0	2	0	0	0	k__Bacteria; p__Bacteroidetes; c__Sphingobacteriia; o__Sphingobacteriales; f__Sphingobacteriaceae; g__Pedobacter; s__sp. eg
286	8	1	9	6	8	k__Bacteria; p__Proteobacteria; c__Gammaproteobacteria; o__Pseudomonadales; f__Pseudomonadaceae; g__Pseudomonas; s__
1282	9	1	2	5	20	k__Bacteria; p__Firmicutes; c__Bacilli; o__Bacillales; f__Staphylococcaceae; g__Staphylococcus; s__epidermidis
1653831	5	1	7	3	7	k__Bacteria; p__Bacteroidetes; c__Flavobacteriia; o__Flavobacteriales; f__Blattabacteriaceae; g__Blattabacterium; s__cuenoti
29465	0	1	0	3	0	k__Bacteria; p__Firmicutes; c__Negativicutes; o__Veillonellales; f__Veillonellaceae; g__Veillonella; s__
186817	8	1	8	2	8	k__Bacteria; p__Firmicutes; c__Bacilli; o__Bacillales; f__Bacillaceae; g__; s__
1491	14	1	12	2	8	k__Bacteria; p__Firmicutes; c__Clostridia; o__Eubacteriales; f__Clostridiaceae; g__Clostridium; s__botulinum
848	7	1	43	2	2	k__Bacteria; p__Fusobacteria; c__Fusobacteriia; o__Fusobacteriales; f__Fusobacteriaceae; g__Fusobacterium; s__
1492	23	1	55	2	1	k__Bacteria; p__Firmicutes; c__Clostridia; o__Eubacteriales; f__Clostridiaceae; g__Clostridium; s__butyricum
199	2	1	2	2	0	k__Bacteria; p__Proteobacteria; c__Epsilonproteobacteria; o__Campylobacterales; f__Campylobacteraceae; g__Campylobacter; s__concisus
33936	3	1	0	1	6	k__Bacteria; p__Firmicutes; c__Bacilli; o__Bacillales; f__Bacillaceae; g__Aeribacillus; s__pallidus
1892252	3170	1	2	1	3	k__Bacteria; p__Cyanobacteria; c__; o__Oscillatoriales; f__Microcoleaceae; g__; s__
585	4	1	4	1	1	k__Bacteria; p__Proteobacteria; c__Gammaproteobacteria; o__Enterobacterales; f__Morganellaceae; g__Proteus; s__vulgaris
80864	4	1	0	1	1	k__Bacteria; p__Proteobacteria; c__Betaproteobacteria; o__Burkholderiales; f__Comamonadaceae; g__; s__
44249	0	1	3	1	1	k__Bacteria; p__Firmicutes; c__Bacilli; o__Bacillales; f__Paenibacillaceae; g__Paenibacillus; s__
1471	1	1	0	1	0	k__Bacteria; p__Firmicutes; c__Bacilli; o__Bacillales; f__Bacillaceae; g__Bacillus; s__methanolicus
98403	0	1	0	1	0	k__Eukaryota; p__Ascomycota; c__Sordariomycetes; o__Hypocreales; f__Ophiocordycipitaceae; g__Drechmeria; s__coniospora
2212991	0	1	0	1	0	k__Bacteria; p__Firmicutes; c__Clostridia; o__Eubacteriales; f__Clostridiaceae; g__Clostridium; s__sp. AWRP
2507161	0	1	1	1	0	k__Bacteria; p__Firmicutes; c__Tissierellia; o__Tissierellales; f__Tissierellaceae; g__Tissierella; s__Tissierellia sp. JN-28
54299	0	1	0	1	0	k__Bacteria; p__Cyanobacteria; c__; o__Chroococcidiopsidales; f__Chroococcidiopsidaceae; g__Chroococcidiopsis; s__thermalis
654	0	1	1	1	0	k__Bacteria; p__Proteobacteria; c__Gammaproteobacteria; o__Aeromonadales; f__Aeromonadaceae; g__Aeromonas; s__veronii
1041504	12	1	2	0	22	k__Bacteria; p__Firmicutes; c__Clostridia; o__Eubacteriales; f__Clostridiaceae; g__Candidatus Arthromitus; s__sp. SFB-rat-Yit
1590	196	1	0	0	21	k__Bacteria; p__Firmicutes; c__Bacilli; o__Lactobacillales; f__Lactobacillaceae; g__Lactiplantibacillus; s__plantarum
756892	6	1	0	0	6	k__Bacteria; p__Proteobacteria; c__Gammaproteobacteria; o__Pseudomonadales; f__Moraxellaceae; g__Acinetobacter; s__indicus
1280	10	1	9	0	5	k__Bacteria; p__Firmicutes; c__Bacilli; o__Bacillales; f__Staphylococcaceae; g__Staphylococcus; s__aureus
113608	0	1	1	0	4	k__Eukaryota; p__Ascomycota; c__Saccharomycetes; o__Saccharomycetales; f__Saccharomycetaceae; g__Tetrapisispora; s__phaffii
986	4	1	0	0	3	k__Bacteria; p__Bacteroidetes; c__Flavobacteriia; o__Flavobacteriales; f__Flavobacteriaceae; g__Flavobacterium; s__johnsoniae
5875	0	1	3	0	3	k__Eukaryota; p__Apicomplexa; c__Aconoidasida; o__Piroplasmida; f__Theileriidae; g__Theileria; s__parva
408	0	1	0	0	3	k__Bacteria; p__Proteobacteria; c__Alphaproteobacteria; o__Hyphomicrobiales; f__Methylobacteriaceae; g__Methylorubrum; s__extorquens
169679	1	1	0	0	2	k__Bacteria; p__Firmicutes; c__Clostridia; o__Eubacteriales; f__Clostridiaceae; g__Clostridium; s__saccharobutylicum
2382161	2	1	0	0	2	k__Bacteria; p__Firmicutes; c__Clostridia; o__Halanaerobiales; f__Halanaerobiaceae; g__Halocella; s__sp. SP3-1
1564138	1	1	1	0	2	k__Bacteria; p__Proteobacteria; c__Epsilonproteobacteria; o__Campylobacterales; f__Campylobacteraceae; g__Aliarcobacter; s__faecis
253	2	1	0	0	2	k__Bacteria; p__Bacteroidetes; c__Flavobacteriia; o__Flavobacteriales; f__Weeksellaceae; g__Chryseobacterium; s__indologenes
281120	8	1	4	0	2	k__Bacteria; p__Bacteroidetes; c__Cytophagia; o__Cytophagales; f__Amoebophilaceae; g__Candidatus Amoebophilus; s__asiaticus
2507159	0	1	2	0	2	k__Bacteria; p__Firmicutes; c__Clostridia; o__Eubacteriales; f__Clostridiaceae; g__Clostridium; s__sp. JN-9
2099387	1	1	0	0	1	k__Bacteria; p__Cyanobacteria; c__; o__Nostocales; f__Tolypothrichaceae; g__Tolypothrix; s__sp. PCC 7910
1428	1	1	3	0	1	k__Bacteria; p__Firmicutes; c__Bacilli; o__Bacillales; f__Bacillaceae; g__Bacillus; s__thuringiensis
1561	3	1	3	0	1	k__Bacteria; p__Firmicutes; c__Clostridia; o__Eubacteriales; f__Clostridiaceae; g__Clostridium; s__baratii
1519	1	1	1	0	1	k__Bacteria; p__Firmicutes; c__Clostridia; o__Eubacteriales; f__Clostridiaceae; g__Clostridium; s__tyrobutyricum
471	1	1	0	0	1	k__Bacteria; p__Proteobacteria; c__Gammaproteobacteria; o__Pseudomonadales; f__Moraxellaceae; g__Acinetobacter; s__calcoaceticus
43263	3	1	1	0	1	k__Bacteria; p__Proteobacteria; c__Gammaproteobacteria; o__Pseudomonadales; f__Pseudomonadaceae; g__Pseudomonas; s__alcaligenes
194	2	1	2	0	1	k__Bacteria; p__Proteobacteria; c__Epsilonproteobacteria; o__Campylobacterales; f__Campylobacteraceae; g__Campylobacter; s__
210	5	1	2	0	1	k__Bacteria; p__Proteobacteria; c__Epsilonproteobacteria; o__Campylobacterales; f__Helicobacteraceae; g__Helicobacter; s__pylori
308354	0	1	0	0	1	k__Bacteria; p__Firmicutes; c__Bacilli; o__Bacillales; f__Staphylococcaceae; g__Staphylococcus; s__simiae
1296	0	1	4	0	1	k__Bacteria; p__Firmicutes; c__Bacilli; o__Bacillales; f__Staphylococcaceae; g__Mammaliicoccus; s__sciuri
1794699	0	1	2	0	1	k__Bacteria; p__Firmicutes; c__Clostridia; o__Thermoanaerobacterales; f__Thermodesulfobiaceae; g__Thermodesulfobium; s__acidiphilum
1155739	0	1	1	0	1	k__Bacteria; p__Cyanobacteria; c__; o__Oscillatoriales; f__Oscillatoriaceae; g__Moorea; s__producens
2139	0	1	0	0	1	k__Bacteria; p__Tenericutes; c__Mollicutes; o__Entomoplasmatales; f__Spiroplasmataceae; g__Spiroplasma; s__clarkii
2042961	0	1	1	0	1	k__Bacteria; p__Proteobacteria; c__Epsilonproteobacteria; o__Campylobacterales; f__Campylobacteraceae; g__Campylobacter; s__blaseri
953	0	1	0	0	1	k__Bacteria; p__Proteobacteria; c__Alphaproteobacteria; o__Rickettsiales; f__Anaplasmataceae; g__Wolbachia; s__
1324352	0	1	3	0	1	k__Bacteria; p__Bacteroidetes; c__Flavobacteriia; o__Flavobacteriales; f__Weeksellaceae; g__Chryseobacterium; s__gallinarum
28251	0	1	0	0	1	k__Bacteria; p__Bacteroidetes; c__Flavobacteriia; o__Flavobacteriales; f__Weeksellaceae; g__Ornithobacterium; s__rhinotracheale
290053	0	1	0	0	1	k__Bacteria; p__Bacteroidetes; c__Bacteroidia; o__Bacteroidales; f__Bacteroidaceae; g__Bacteroides; s__helcogenes
35823	1532	1	0	0	0	k__Bacteria; p__Cyanobacteria; c__; o__Oscillatoriales; f__Microcoleaceae; g__Arthrospira; s__
1617448	1	1	0	0	0	k__Bacteria; p__Cyanobacteria; c__; o__Chroococcales; f__Chroococcaceae; g__Geminocystis; s__sp. NIES-3709
379064	1	1	0	0	0	k__Bacteria; p__Cyanobacteria; c__; o__Chroococcales; f__Geminocystaceae; g__Cyanobacterium; s__aponinum
142864	1	1	0	0	0	k__Bacteria; p__Cyanobacteria; c__; o__Nostocales; f__Nostocaceae; g__Cylindrospermum; s__stagnale
1357	1	1	0	0	0	k__Bacteria; p__Firmicutes; c__Bacilli; o__Lactobacillales; f__Streptococcaceae; g__Lactococcus; s__
1363	2	1	0	0	0	k__Bacteria; p__Firmicutes; c__Bacilli; o__Lactobacillales; f__Streptococcaceae; g__Lactococcus; s__garvieae
2571750	1	1	1	0	0	k__Bacteria; p__Firmicutes; c__Bacilli; o__Lactobacillales; f__Enterococcaceae; g__Vagococcus; s__zengguangii
33970	1	1	0	0	0	k__Bacteria; p__Firmicutes; c__Bacilli; o__Lactobacillales; f__Enterococcaceae; g__Melissococcus; s__plutonius
2598861	1	1	0	0	0	k__Bacteria; p__Firmicutes; c__Bacilli; o__Bacillales; f__Bacillaceae; g__Alkalihalobacillus; s__miscanthi
2072025	1	1	0	0	0	k__Bacteria; p__Firmicutes; c__Bacilli; o__Bacillales; f__Bacillaceae; g__Lysinibacillus; s__sp. YS11
1288	4	1	0	0	0	k__Bacteria; p__Firmicutes; c__Bacilli; o__Bacillales; f__Staphylococcaceae; g__Staphylococcus; s__xylosus
61015	1	1	0	0	0	k__Bacteria; p__Firmicutes; c__Bacilli; o__Bacillales; f__Staphylococcaceae; g__Staphylococcus; s__succinus
332101	1	1	1	0	0	k__Bacteria; p__Firmicutes; c__Clostridia; o__Eubacteriales; f__Clostridiaceae; g__Clostridium; s__drakei
116090	1	1	1	0	0	k__Bacteria; p__Firmicutes; c__Clostridia; o__Eubacteriales; f__Clostridiaceae; g__Caloranaerobacter; s__azorensis
1505	2	1	3	0	0	k__Bacteria; p__Firmicutes; c__Clostridia; o__Eubacteriales; f__Peptostreptococcaceae; g__Paeniclostridium; s__sordellii
2736602	1	1	2	0	0	k__Bacteria; p__Firmicutes; c__Clostridia; o__Eubacteriales; f__Lachnospiraceae; g__Anaerocolumna; s__sp. CTTW
2041044	1	1	0	0	0	k__Bacteria; p__Firmicutes; c__Clostridia; o__Eubacteriales; f__Eubacteriaceae; g__Eubacterium; s__maltosivorans
51365	1	1	0	0	0	k__Bacteria; p__Tenericutes; c__Mollicutes; o__Mycoplasmatales; f__Mycoplasmataceae; g__Mycoplasma; s__yeatsii
2132	1	1	0	0	0	k__Bacteria; p__Tenericutes; c__Mollicutes; o__Entomoplasmatales; f__Spiroplasmataceae; g__Spiroplasma; s__
2681984	1	1	0	0	0	k__Bacteria; p__Proteobacteria; c__Gammaproteobacteria; o__Enterobacterales; f__Erwiniaceae; g__Erwinia; s__sp. J780
2662362	1	1	0	0	0	k__Bacteria; p__Proteobacteria; c__Gammaproteobacteria; o__Pseudomonadales; f__Moraxellaceae; g__Acinetobacter; s__wanghuae
2698686	1	1	0	0	0	k__Bacteria; p__Proteobacteria; c__Gammaproteobacteria; o__Alteromonadales; f__Shewanellaceae; g__Shewanella; s__sp. Arc9-LZ
2735563	1	1	0	0	0	k__Bacteria; p__Proteobacteria; c__Gammaproteobacteria; o__Thiotrichales; f__Thiotrichaceae; g__Thiothrix; s__sp. Ku-5
40324	2	1	0	0	0	k__Bacteria; p__Proteobacteria; c__Gammaproteobacteria; o__Xanthomonadales; f__Xanthomonadaceae; g__Stenotrophomonas; s__maltophilia
779	1	1	2	0	0	k__Bacteria; p__Proteobacteria; c__Alphaproteobacteria; o__Rickettsiales; f__Anaplasmataceae; g__Ehrlichia; s__ruminantium
1176482	1	1	1	0	0	k__Bacteria; p__Proteobacteria; c__Epsilonproteobacteria; o__Campylobacterales; f__Thiovulaceae; g__Sulfurimonas; s__gotlandica
2740405	1	1	0	0	0	k__Bacteria; p__Proteobacteria; c__Epsilonproteobacteria; o__Campylobacterales; f__Thiovulaceae; g__Sulfurimonas; s__Candidatus Sulfurimonas marisnigri
2775246	1	1	1	0	0	k__Bacteria; p__Bacteroidetes; c__Flavobacteriia; o__Flavobacteriales; f__Flavobacteriaceae; g__Flavobacterium; s__sp. CS20
2478552	1	1	0	0	0	k__Bacteria; p__Bacteroidetes; c__Flavobacteriia; o__Flavobacteriales; f__Flavobacteriaceae; g__Flavobacterium; s__sp. 140616W15
1774273	1	1	1	0	0	k__Bacteria; p__Bacteroidetes; c__Flavobacteriia; o__Flavobacteriales; f__Flavobacteriaceae; g__Polaribacter; s__vadi
2697010	1	1	0	0	0	k__Bacteria; p__Bacteroidetes; c__Flavobacteriia; o__Flavobacteriales; f__Flavobacteriaceae; g__Winogradskyella; s__helgolandensis
1241981	1	1	0	0	0	k__Bacteria; p__Bacteroidetes; c__Flavobacteriia; o__Flavobacteriales; f__Weeksellaceae; g__Epilithonimonas; s__Chryseobacterium lactis
1585976	1	1	0	0	0	k__Bacteria; p__Bacteroidetes; c__Flavobacteriia; o__Flavobacteriales; f__Weeksellaceae; g__Bergeyella; s__cardium
1796613	1	1	0	0	0	k__Bacteria; p__Bacteroidetes; c__Bacteroidia; o__Bacteroidales; f__Bacteroidaceae; g__Bacteroides; s__caecimuris
561061	1	1	0	0	0	k__Bacteria; p__Bacteroidetes; c__Sphingobacteriia; o__Sphingobacteriales; f__Sphingobacteriaceae; g__Sphingobacterium; s__psychroaquaticum
671211	1	1	1	0	0	k__Bacteria; p__Fusobacteria; c__Fusobacteriia; o__Fusobacteriales; f__Fusobacteriaceae; g__Fusobacterium; s__sp. oral taxon 203
64895	1	1	0	0	0	k__Bacteria; p__Spirochaetes; c__Spirochaetia; o__Spirochaetales; f__Borreliaceae; g__Borreliella; s__
230361	1	1	0	0	0	k__Archaea; p__Euryarchaeota; c__Methanobacteria; o__Methanobacteriales; f__Methanobacteriaceae; g__Methanobrevibacter; s__millerae
1047171	0	1	2	0	0	k__Eukaryota; p__Ascomycota; c__Dothideomycetes; o__Mycosphaerellales; f__Mycosphaerellaceae; g__Zymoseptoria; s__tritici
37769	0	1	0	0	0	k__Eukaryota; p__Basidiomycota; c__Tremellomycetes; o__Tremellales; f__Cryptococcaceae; g__Cryptococcus; s__gattii VGI
580165	0	1	0	0	0	k__Bacteria; p__Firmicutes; c__Bacilli; o__Bacillales; f__Bacillaceae; g__Bacillus; s__cytotoxicus
72361	0	1	0	0	0	k__Bacteria; p__Firmicutes; c__Bacilli; o__Bacillales; f__Bacillaceae; g__Bacillus; s__vallismortis
2169540	0	1	0	0	0	k__Bacteria; p__Firmicutes; c__Bacilli; o__Bacillales; f__Bacillaceae; g__Lysinibacillus; s__sp. 2017
2590012	0	1	1	0	0	k__Bacteria; p__Firmicutes; c__Bacilli; o__Bacillales; f__Bacillaceae; g__Lysinibacillus; s__sp. FJAT-51161
28031	0	1	2	0	0	k__Bacteria; p__Firmicutes; c__Bacilli; o__Bacillales; f__Bacillaceae; g__Lysinibacillus; s__fusiformis
1193713	0	1	0	0	0	k__Bacteria; p__Firmicutes; c__Bacilli; o__Bacillales; f__Bacillaceae; g__Neobacillus; s__mesonae
1855823	0	1	3	0	0	k__Bacteria; p__Firmicutes; c__Bacilli; o__Bacillales; f__Staphylococcaceae; g__Macrococcus; s__canis
2707005	0	1	2	0	0	k__Bacteria; p__Firmicutes; c__Bacilli; o__Bacillales; f__Paenibacillaceae; g__Paenibacillus; s__lutimineralis
1870820	0	1	1	0	0	k__Bacteria; p__Firmicutes; c__Bacilli; o__Bacillales; f__Paenibacillaceae; g__Paenibacillus; s__ihbetae
189426	0	1	0	0	0	k__Bacteria; p__Firmicutes; c__Bacilli; o__Bacillales; f__Paenibacillaceae; g__Paenibacillus; s__odorifer
1536771	0	1	0	0	0	k__Bacteria; p__Firmicutes; c__Bacilli; o__Bacillales; f__Paenibacillaceae; g__Paenibacillus; s__sp. FSL R5-0912
1637	0	1	0	0	0	k__Bacteria; p__Firmicutes; c__Bacilli; o__Bacillales; f__Listeriaceae; g__Listeria; s__
1638	0	1	2	0	0	k__Bacteria; p__Firmicutes; c__Bacilli; o__Bacillales; f__Listeriaceae; g__Listeria; s__ivanovii
367743	0	1	0	0	0	k__Bacteria; p__Firmicutes; c__Bacilli; o__Bacillales; f__Planococcaceae; g__Ureibacillus; s__thermophilus
332410	0	1	0	0	0	k__Bacteria; p__Firmicutes; c__Bacilli; o__Bacillales; f__Planococcaceae; g__Exiguobacterium; s__sibiricum
51663	0	1	0	0	0	k__Bacteria; p__Firmicutes; c__Bacilli; o__Lactobacillales; f__Lactobacillaceae; g__Pediococcus; s__damnosus
1588	0	1	0	0	0	k__Bacteria; p__Firmicutes; c__Bacilli; o__Lactobacillales; f__Lactobacillaceae; g__Lentilactobacillus; s__hilgardii
1603	0	1	0	0	0	k__Bacteria; p__Firmicutes; c__Bacilli; o__Lactobacillales; f__Lactobacillaceae; g__Amylolactobacillus; s__amylophilus
227945	0	1	0	0	0	k__Bacteria; p__Firmicutes; c__Bacilli; o__Lactobacillales; f__Lactobacillaceae; g__Lactobacillus; s__ultunensis
1629	0	1	0	0	0	k__Bacteria; p__Firmicutes; c__Bacilli; o__Lactobacillales; f__Lactobacillaceae; g__Weissella; s__viridescens
1310	0	1	0	0	0	k__Bacteria; p__Firmicutes; c__Bacilli; o__Lactobacillales; f__Streptococcaceae; g__Streptococcus; s__sobrinus
182773	0	1	0	0	0	k__Bacteria; p__Firmicutes; c__Clostridia; o__Eubacteriales; f__Clostridiaceae; g__Clostridium; s__isatidis
33035	0	1	0	0	0	k__Bacteria; p__Firmicutes; c__Clostridia; o__Eubacteriales; f__Lachnospiraceae; g__Blautia; s__producta
1912897	0	1	0	0	0	k__Bacteria; p__Firmicutes; c__Clostridia; o__Eubacteriales; f__Lachnospiraceae; g__Blautia; s__argi
2696063	0	1	1	0	0	k__Bacteria; p__Firmicutes; c__Clostridia; o__Eubacteriales; f__Lachnospiraceae; g__Anaerocolumna; s__sedimenticola
29322	0	1	0	0	0	k__Bacteria; p__Firmicutes; c__Clostridia; o__Eubacteriales; f__Eubacteriaceae; g__Eubacterium; s__[Eubacterium] cellulosolvens
59610	0	1	1	0	0	k__Bacteria; p__Firmicutes; c__Clostridia; o__Eubacteriales; f__Peptococcaceae; g__Desulfotomaculum; s__reducens
51197	0	1	0	0	0	k__Bacteria; p__Firmicutes; c__Clostridia; o__Eubacteriales; f__Peptococcaceae; g__Syntrophobotulus; s__glycolicus
884684	0	1	0	0	0	k__Bacteria; p__Firmicutes; c__Clostridia; o__Eubacteriales; f__Oscillospiraceae; g__Mageeibacillus; s__indolicus
1297617	0	1	0	0	0	k__Bacteria; p__Firmicutes; c__Clostridia; o__Eubacteriales; f__Oscillospiraceae; g__Intestinimonas; s__butyriciproducens
669359	0	1	0	0	0	k__Bacteria; p__Cyanobacteria; c__; o__Chroococcales; f__Chroococcaceae; g__Geminocystis; s__herdmanii
216963	0	1	0	0	0	k__Bacteria; p__Tenericutes; c__Mollicutes; o__Entomoplasmatales; f__Spiroplasmataceae; g__Spiroplasma; s__sp. TIUS-1
2138	0	1	1	0	0	k__Bacteria; p__Tenericutes; c__Mollicutes; o__Entomoplasmatales; f__Spiroplasmataceae; g__Spiroplasma; s__poulsonii
2093	0	1	0	0	0	k__Bacteria; p__Tenericutes; c__Mollicutes; o__Mycoplasmatales; f__Mycoplasmataceae; g__Mycoplasma; s__
2096	0	1	1	0	0	k__Bacteria; p__Tenericutes; c__Mollicutes; o__Mycoplasmatales; f__Mycoplasmataceae; g__Mycoplasma; s__gallisepticum
92401	0	1	0	0	0	k__Bacteria; p__Tenericutes; c__Mollicutes; o__Mycoplasmatales; f__Mycoplasmataceae; g__Mycoplasma; s__cloacale
171284	0	1	3	0	0	k__Bacteria; p__Tenericutes; c__Mollicutes; o__Mycoplasmatales; f__Mycoplasmataceae; g__Mycoplasmopsis; s__Mycoplasma cynos
83656	0	1	0	0	0	k__Bacteria; p__Actinobacteria; c__Actinomycetia; o__Streptomycetales; f__Streptomycetaceae; g__Streptomyces; s__tsukubensis
2692234	0	1	0	0	0	k__Bacteria; p__Actinobacteria; c__Actinomycetia; o__Streptomycetales; f__Streptomycetaceae; g__Streptomyces; s__sp. GS7
1670	0	1	0	0	0	k__Bacteria; p__Actinobacteria; c__Actinomycetia; o__Micrococcales; f__Micrococcaceae; g__Arthrobacter; s__citreus
36809	0	1	0	0	0	k__Bacteria; p__Actinobacteria; c__Actinomycetia; o__Corynebacteriales; f__Mycobacteriaceae; g__Mycobacteroides; s__abscessus
1382	0	1	0	0	0	k__Bacteria; p__Actinobacteria; c__Coriobacteriia; o__Coriobacteriales; f__Atopobiaceae; g__Lancefieldella; s__parvula
208962	0	1	1	0	0	k__Bacteria; p__Proteobacteria; c__Gammaproteobacteria; o__Enterobacterales; f__Enterobacteriaceae; g__Escherichia; s__albertii
134287	0	1	1	0	0	k__Bacteria; p__Proteobacteria; c__Gammaproteobacteria; o__Enterobacterales; f__Enterobacteriaceae; g__Candidatus Blochmannia; s__secondary endosymbiont of Heteropsylla cubana
168169	0	1	0	0	0	k__Bacteria; p__Proteobacteria; c__Gammaproteobacteria; o__Enterobacterales; f__Enterobacteriaceae; g__Candidatus Ishikawaella; s__capsulata
419257	0	1	0	0	0	k__Bacteria; p__Proteobacteria; c__Gammaproteobacteria; o__Enterobacterales; f__Yersiniaceae; g__Yersinia; s__massiliensis
615	0	1	0	0	0	k__Bacteria; p__Proteobacteria; c__Gammaproteobacteria; o__Enterobacterales; f__Yersiniaceae; g__Serratia; s__marcescens
2597702	0	1	0	0	0	k__Bacteria; p__Proteobacteria; c__Gammaproteobacteria; o__Enterobacterales; f__Yersiniaceae; g__Serratia; s__sp. KUDC3025
291112	0	1	1	0	0	k__Bacteria; p__Proteobacteria; c__Gammaproteobacteria; o__Enterobacterales; f__Morganellaceae; g__Photorhabdus; s__asymbiotica
2218628	0	1	2	0	0	k__Bacteria; p__Proteobacteria; c__Gammaproteobacteria; o__Enterobacterales; f__Morganellaceae; g__Photorhabdus; s__laumondii
1789224	0	1	0	0	0	k__Bacteria; p__Proteobacteria; c__Gammaproteobacteria; o__Pseudomonadales; f__Moraxellaceae; g__Acinetobacter; s__larvae
53408	0	1	0	0	0	k__Bacteria; p__Proteobacteria; c__Gammaproteobacteria; o__Pseudomonadales; f__Pseudomonadaceae; g__Pseudomonas; s__citronellolis
2589790	0	1	0	0	0	k__Bacteria; p__Proteobacteria; c__Gammaproteobacteria; o__Alteromonadales; f__Shewanellaceae; g__Shewanella; s__sp. LC6
43659	0	1	0	0	0	k__Bacteria; p__Proteobacteria; c__Gammaproteobacteria; o__Alteromonadales; f__Pseudoalteromonadaceae; g__Pseudoalteromonas; s__tetraodonis
1763998	0	1	0	0	0	k__Bacteria; p__Proteobacteria; c__Gammaproteobacteria; o__Chromatiales; f__Chromatiaceae; g__Rheinheimera; s__sp. F8
553981	0	1	0	0	0	k__Bacteria; p__Proteobacteria; c__Gammaproteobacteria; o__Chromatiales; f__Chromatiaceae; g__Candidatus Nitrosacidococcus; s__tergens
106634	0	1	0	0	0	k__Bacteria; p__Proteobacteria; c__Gammaproteobacteria; o__Chromatiales; f__Ectothiorhodospiraceae; g__Thioalkalivibrio; s__versutus
1033854	0	1	0	0	0	k__Bacteria; p__Proteobacteria; c__Gammaproteobacteria; o__Chromatiales; f__Ectothiorhodospiraceae; g__Thioalkalivibrio; s__sulfidiphilus
1811807	0	1	0	0	0	k__Bacteria; p__Proteobacteria; c__Gammaproteobacteria; o__Chromatiales; f__Granulosicoccaceae; g__Sulfuriflexus; s__mobilis
1085644	0	1	1	0	0	k__Bacteria; p__Proteobacteria; c__Gammaproteobacteria; o__Thiotrichales; f__Francisellaceae; g__Allofrancisella; s__frigidaquae
2580412	0	1	0	0	0	k__Bacteria; p__Proteobacteria; c__Gammaproteobacteria; o__Thiotrichales; f__Piscirickettsiaceae; g__Thiomicrorhabdus; s__sediminis
1620392	0	1	0	0	0	k__Bacteria; p__Proteobacteria; c__Gammaproteobacteria; o__Cellvibrionales; f__Spongiibacteraceae; g__Spongiibacter; s__sp. IMCC21906
400668	0	1	0	0	0	k__Bacteria; p__Proteobacteria; c__Gammaproteobacteria; o__Oceanospirillales; f__Oceanospirillaceae; g__Marinomonas; s__sp. MWYL1
2071621	0	1	0	0	0	k__Bacteria; p__Proteobacteria; c__Gammaproteobacteria; o__Oceanospirillales; f__Oceanospirillaceae; g__Marinomonas; s__sp. FW-1
1867846	0	1	0	0	0	k__Bacteria; p__Proteobacteria; c__Gammaproteobacteria; o__Legionellales; f__Legionellaceae; g__Legionella; s__clemsonensis
1660073	0	1	0	0	0	k__Bacteria; p__Proteobacteria; c__Epsilonproteobacteria; o__Campylobacterales; f__Campylobacteraceae; g__Campylobacter; s__sp. RM6137
449520	0	1	1	0	0	k__Bacteria; p__Proteobacteria; c__Epsilonproteobacteria; o__Campylobacterales; f__Campylobacteraceae; g__Campylobacter; s__canadensis
913109	0	1	0	0	0	k__Bacteria; p__Proteobacteria; c__Epsilonproteobacteria; o__Campylobacterales; f__Campylobacteraceae; g__Arcobacter; s__ellisii
1912871	0	1	0	0	0	k__Bacteria; p__Proteobacteria; c__Epsilonproteobacteria; o__Campylobacterales; f__Campylobacteraceae; g__Malaciobacter; s__canalis
1812115	0	1	0	0	0	k__Bacteria; p__Proteobacteria; c__Alphaproteobacteria; o__Rickettsiales; f__Anaplasmataceae; g__Wolbachia; s__endosymbiont of Dirofilaria (Dirofilaria) immitis
788	0	1	0	0	0	k__Bacteria; p__Proteobacteria; c__Alphaproteobacteria; o__Rickettsiales; f__Rickettsiaceae; g__Rickettsia; s__canadensis
1792307	0	1	0	0	0	k__Bacteria; p__Proteobacteria; c__Alphaproteobacteria; o__Hyphomicrobiales; f__Bradyrhizobiaceae; g__Bosea; s__sp. PAMC 26642
359	0	1	0	0	0	k__Bacteria; p__Proteobacteria; c__Alphaproteobacteria; o__Hyphomicrobiales; f__Rhizobiaceae; g__Agrobacterium; s__rhizogenes
2077182	0	1	0	0	0	k__Bacteria; p__Proteobacteria; c__Alphaproteobacteria; o__Sphingomonadales; f__Sphingomonadaceae; g__Sphingorhabdus; s__sp. YGSMI21
2604537	0	1	0	0	0	k__Bacteria; p__Proteobacteria; c__Alphaproteobacteria; o__Sphingomonadales; f__Erythrobacteraceae; g__Altererythrobacter; s__sp. BO-6
481146	0	1	0	0	0	k__Bacteria; p__Proteobacteria; c__Alphaproteobacteria; o__Rhodospirillales; f__Acetobacteraceae; g__Acetobacter; s__ascendens
2478662	0	1	0	0	0	k__Bacteria; p__Proteobacteria; c__Betaproteobacteria; o__Burkholderiales; f__Comamonadaceae; g__Acidovorax; s__sp. 1608163
2774875	0	1	0	0	0	k__Bacteria; p__Proteobacteria; c__Betaproteobacteria; o__Burkholderiales; f__Comamonadaceae; g__Variovorax; s__sp. 38R
55508	0	1	0	0	0	k__Bacteria; p__Proteobacteria; c__Betaproteobacteria; o__Burkholderiales; f__Oxalobacteraceae; g__Janthinobacterium; s__agaricidamnosum
1636423	0	1	0	0	0	k__Bacteria; p__Proteobacteria; c__Betaproteobacteria; o__Burkholderiales; f__Burkholderiaceae; g__Burkholderia; s__sp. MSMB1588
640030	0	1	0	0	0	k__Bacteria; p__Proteobacteria; c__Betaproteobacteria; o__Neisseriales; f__Neisseriaceae; g__Neisseria; s__zalophi
2172098	0	1	0	0	0	k__Bacteria; p__Bacteroidetes; c__Flavobacteriia; o__Flavobacteriales; f__Flavobacteriaceae; g__Flavobacterium; s__pallidum
754397	0	1	0	0	0	k__Bacteria; p__Bacteroidetes; c__Flavobacteriia; o__Flavobacteriales; f__Flavobacteriaceae; g__Polaribacter; s__sp. SA4-10
2686361	0	1	2	0	0	k__Bacteria; p__Bacteroidetes; c__Flavobacteriia; o__Flavobacteriales; f__Flavobacteriaceae; g__Polaribacter; s__sp. L3A8
1017	0	1	0	0	0	k__Bacteria; p__Bacteroidetes; c__Flavobacteriia; o__Flavobacteriales; f__Flavobacteriaceae; g__Capnocytophaga; s__gingivalis
1945657	0	1	0	0	0	k__Bacteria; p__Bacteroidetes; c__Flavobacteriia; o__Flavobacteriales; f__Flavobacteriaceae; g__Capnocytophaga; s__sp. H2931
1622118	0	1	1	0	0	k__Bacteria; p__Bacteroidetes; c__Flavobacteriia; o__Flavobacteriales; f__Flavobacteriaceae; g__Lutibacter; s__profundi
252356	0	1	0	0	0	k__Bacteria; p__Bacteroidetes; c__Flavobacteriia; o__Flavobacteriales; f__Flavobacteriaceae; g__Maribacter; s__
1729720	0	1	0	0	0	k__Bacteria; p__Bacteroidetes; c__Flavobacteriia; o__Flavobacteriales; f__Flavobacteriaceae; g__Salegentibacter; s__sp. T436
1850246	0	1	0	0	0	k__Bacteria; p__Bacteroidetes; c__Flavobacteriia; o__Flavobacteriales; f__Flavobacteriaceae; g__Urechidicola; s__croceus
2049305	0	1	0	0	0	k__Bacteria; p__Bacteroidetes; c__Flavobacteriia; o__Flavobacteriales; f__Flavobacteriaceae; g__Changchengzhania; s__lutea
1493872	0	1	0	0	0	k__Bacteria; p__Bacteroidetes; c__Flavobacteriia; o__Flavobacteriales; f__Weeksellaceae; g__Chryseobacterium; s__shandongense
624186	0	1	0	0	0	k__Bacteria; p__Bacteroidetes; c__Flavobacteriia; o__Flavobacteriales; f__Blattabacteriaceae; g__Blattabacterium; s__sp. (Blattella germanica)
363852	0	1	1	0	0	k__Bacteria; p__Bacteroidetes; c__Sphingobacteriia; o__Sphingobacteriales; f__Sphingobacteriaceae; g__Pedobacter; s__ginsengisoli
2650158	0	1	0	0	0	k__Bacteria; p__Bacteroidetes; c__Bacteroidia; o__Bacteroidales; f__Bacteroidaceae; g__Bacteroides; s__sp. HF-5141
328814	0	1	0	0	0	k__Bacteria; p__Bacteroidetes; c__Bacteroidia; o__Bacteroidales; f__Rikenellaceae; g__Alistipes; s__shahii
387090	0	1	0	0	0	k__Bacteria; p__Bacteroidetes; c__Bacteroidia; o__Bacteroidales; f__Rikenellaceae; g__Phocaeicola; s__coprophilus
1642647	0	1	0	0	0	k__Bacteria; p__Bacteroidetes; c__Bacteroidia; o__Bacteroidales; f__Dysgonomonadaceae; g__Proteiniphilum; s__saccharofermentans
2675877	0	1	0	0	0	k__Bacteria; p__Bacteroidetes; c__Cytophagia; o__Cytophagales; f__Hymenobacteraceae; g__Hymenobacter; s__sp. BRD67
1379909	0	1	0	0	0	k__Bacteria; p__Bacteroidetes; c__Cytophagia; o__Cytophagales; f__Hymenobacteraceae; g__Rufibacter; s__sp. DG15C
2704465	0	1	1	0	0	k__Bacteria; p__Bacteroidetes; c__Cytophagia; o__Cytophagales; f__Cytophagaceae; g__Rhodocytophaga; s__rosea
320787	0	1	0	0	0	k__Bacteria; p__Bacteroidetes; c__Cytophagia; o__Cytophagales; f__Cyclobacteriaceae; g__Cyclobacterium; s__amurskyense
100716	0	1	0	0	0	k__Bacteria; p__Chlorobi; c__Chlorobia; o__Chlorobiales; f__Chlorobiaceae; g__Chloroherpeton; s__thalassium
1134405	0	1	1	0	0	k__Bacteria; p__Ignavibacteriae; c__Ignavibacteria; o__Ignavibacteriales; f__Melioribacteraceae; g__Melioribacter; s__roseus
1379270	0	1	0	0	0	k__Bacteria; p__Gemmatimonadetes; c__Gemmatimonadetes; o__Gemmatimonadales; f__Gemmatimonadaceae; g__Gemmatimonas; s__phototrophica
40542	0	1	0	0	0	k__Bacteria; p__Fusobacteria; c__Fusobacteriia; o__Fusobacteriales; f__Leptotrichiaceae; g__Leptotrichia; s__buccalis
2795386	0	1	1	0	0	k__Bacteria; p__Verrucomicrobia; c__Methylacidiphilae; o__Methylacidiphilales; f__Methylacidiphilaceae; g__Methylacidiphilum; s__sp. IT6
2774151	0	1	0	0	0	k__Bacteria; p__Planctomycetes; c__Planctomycetia; o__Gemmatales; f__Gemmataceae; g__Frigoriglobus; s__tundricola
408139	0	1	0	0	0	k__Bacteria; p__Spirochaetes; c__Spirochaetia; o__Leptospirales; f__Leptospiraceae; g__Leptospira; s__kmetyi
423605	0	1	0	0	0	k__Bacteria; p__Elusimicrobia; c__Elusimicrobia; o__Elusimicrobiales; f__Elusimicrobiaceae; g__Elusimicrobium; s__minutum
877455	0	1	2	0	0	k__Archaea; p__Euryarchaeota; c__Methanobacteria; o__Methanobacteriales; f__Methanobacteriaceae; g__Methanobacterium; s__lacus
73913	0	1	0	0	0	k__Archaea; p__Euryarchaeota; c__Methanococci; o__Methanococcales; f__Methanocaldococcaceae; g__Methanocaldococcus; s__vulcanius
1353260	0	1	1	0	0	k__Archaea; p__Thaumarchaeota; c__Nitrososphaeria; o__Nitrososphaerales; f__Nitrososphaeraceae; g__Candidatus Nitrosocosmicus; s__oleophilus
2042206	0	1	0	0	0	k__Viruses; p__Uroviricota; c__Caudoviricetes; o__Caudovirales; f__Herelleviridae; g__Silviavirus; s__Staphylococcus virus Stau2
2734052	0	1	0	0	0	k__Viruses; p__Uroviricota; c__Caudoviricetes; o__Caudovirales; f__Herelleviridae; g__Harbinvirus; s__Lactobacillus virus Semele
1589270	0	1	0	0	0	k__Viruses; p__Uroviricota; c__Caudoviricetes; o__Caudovirales; f__Siphoviridae; g__; s__Streptococcus phage Str-PAP-1
2734493	0	1	0	0	0	k__Viruses; p__Negarnaviricota; c__Ellioviricetes; o__Bunyavirales; f__Tospoviridae; g__Orthotospovirus; s__Pepper chlorotic spot orthotospovirus
1301	5	0	3	24	9	k__Bacteria; p__Firmicutes; c__Bacilli; o__Lactobacillales; f__Streptococcaceae; g__Streptococcus; s__
1747	18	0	1	16	34	k__Bacteria; p__Actinobacteria; c__Actinomycetia; o__Propionibacteriales; f__Propionibacteriaceae; g__Cutibacterium; s__acnes
543	9	0	20	11	20	k__Bacteria; p__Proteobacteria; c__Gammaproteobacteria; o__Enterobacterales; f__Enterobacteriaceae; g__; s__
129337	1	0	1	9	9	k__Bacteria; p__Firmicutes; c__Bacilli; o__Bacillales; f__Bacillaceae; g__Geobacillus; s__
1290	8	0	0	8	36	k__Bacteria; p__Firmicutes; c__Bacilli; o__Bacillales; f__Staphylococcaceae; g__Staphylococcus; s__hominis
488447	2	0	2	7	15	k__Bacteria; p__Proteobacteria; c__Betaproteobacteria; o__Burkholderiales; f__Burkholderiaceae; g__Burkholderia; s__contaminans
469	18	0	1	6	15	k__Bacteria; p__Proteobacteria; c__Gammaproteobacteria; o__Pseudomonadales; f__Moraxellaceae; g__Acinetobacter; s__
29380	2	0	0	5	0	k__Bacteria; p__Firmicutes; c__Bacilli; o__Bacillales; f__Staphylococcaceae; g__Staphylococcus; s__caprae
40215	1	0	0	4	2	k__Bacteria; p__Proteobacteria; c__Gammaproteobacteria; o__Pseudomonadales; f__Moraxellaceae; g__Acinetobacter; s__junii
105219	0	0	0	4	1	k__Bacteria; p__Proteobacteria; c__Betaproteobacteria; o__Burkholderiales; f__Burkholderiaceae; g__Ralstonia; s__mannitolilytica
39777	0	0	0	4	0	k__Bacteria; p__Firmicutes; c__Negativicutes; o__Veillonellales; f__Veillonellaceae; g__Veillonella; s__atypica
1921421	8	0	0	3	17	k__Bacteria; p__Firmicutes; c__Bacilli; o__Bacillales; f__Bacillaceae; g__Geobacillus; s__genomosp. 3
33889	8	0	0	3	14	k__Bacteria; p__Actinobacteria; c__Actinomycetia; o__Micrococcales; f__Brevibacteriaceae; g__Brevibacterium; s__casei
1279	11	0	6	3	12	k__Bacteria; p__Firmicutes; c__Bacilli; o__Bacillales; f__Staphylococcaceae; g__Staphylococcus; s__
29378	1	0	0	3	6	k__Bacteria; p__Firmicutes; c__Bacilli; o__Bacillales; f__Staphylococcaceae; g__Staphylococcus; s__arlettae
80840	10	0	0	3	6	k__Bacteria; p__Proteobacteria; c__Betaproteobacteria; o__Burkholderiales; f__; g__; s__
204457	1	0	0	3	3	k__Bacteria; p__Proteobacteria; c__Alphaproteobacteria; o__Sphingomonadales; f__; g__; s__
41297	3	0	0	3	3	k__Bacteria; p__Proteobacteria; c__Alphaproteobacteria; o__Sphingomonadales; f__Sphingomonadaceae; g__; s__
186826	9	0	1	3	2	k__Bacteria; p__Firmicutes; c__Bacilli; o__Lactobacillales; f__; g__; s__
31957	1	0	1	3	2	k__Bacteria; p__Actinobacteria; c__Actinomycetia; o__Propionibacteriales; f__Propionibacteriaceae; g__; s__
244734	1	0	0	3	2	k__Bacteria; p__Proteobacteria; c__Alphaproteobacteria; o__Hyphomicrobiales; f__Bradyrhizobiaceae; g__Bradyrhizobium; s__betae
129338	0	0	0	3	2	k__Bacteria; p__Firmicutes; c__Bacilli; o__Bacillales; f__Bacillaceae; g__Geobacillus; s__subterraneus
29394	1	0	0	3	1	k__Bacteria; p__Firmicutes; c__Bacilli; o__Lactobacillales; f__Carnobacteriaceae; g__Dolosigranulum; s__pigrum
28037	1	0	1	3	0	k__Bacteria; p__Firmicutes; c__Bacilli; o__Lactobacillales; f__Streptococcaceae; g__Streptococcus; s__mitis
1313	0	0	1	3	0	k__Bacteria; p__Firmicutes; c__Bacilli; o__Lactobacillales; f__Streptococcaceae; g__Streptococcus; s__pneumoniae
29385	1	0	0	2	14	k__Bacteria; p__Firmicutes; c__Bacilli; o__Bacillales; f__Staphylococcaceae; g__Staphylococcus; s__saprophyticus
1422	0	0	0	2	4	k__Bacteria; p__Firmicutes; c__Bacilli; o__Bacillales; f__Bacillaceae; g__Geobacillus; s__stearothermophilus
343874	0	0	1	2	3	k__Bacteria; p__Bacteroidetes; c__Flavobacteriia; o__Flavobacteriales; f__Weeksellaceae; g__Empedobacter; s__falsenii
379	0	0	0	2	3	k__Bacteria; p__Proteobacteria; c__Alphaproteobacteria; o__Hyphomicrobiales; f__Rhizobiaceae; g__Rhizobium; s__
1930298	13	0	0	2	2	k__Viruses; p__Cressdnaviricota; c__Repensiviricetes; o__Geplafuvirales; f__Genomoviridae; g__Gemycircularvirus; s__Chicken stool-associated gemycircularvirus
108981	0	0	1	2	2	k__Bacteria; p__Proteobacteria; c__Gammaproteobacteria; o__Pseudomonadales; f__Moraxellaceae; g__Acinetobacter; s__schindleri
356	2	0	1	2	1	k__Bacteria; p__Proteobacteria; c__Alphaproteobacteria; o__Hyphomicrobiales; f__; g__; s__
45972	0	0	0	2	1	k__Bacteria; p__Firmicutes; c__Bacilli; o__Bacillales; f__Staphylococcaceae; g__Staphylococcus; s__pasteuri
84377	0	0	0	2	1	k__Bacteria; p__Spirochaetes; c__Spirochaetia; o__Brachyspirales; f__Brachyspiraceae; g__Brachyspira; s__intermedia
1979527	2	0	0	2	0	k__Bacteria; p__Actinobacteria; c__Actinomycetia; o__Corynebacteriales; f__Corynebacteriaceae; g__Corynebacterium; s__kefirresidentii
2589986	0	0	1	2	0	k__Bacteria; p__Proteobacteria; c__Gammaproteobacteria; o__Thiotrichales; f__Francisellaceae; g__Francisella; s__sp. Scap27
202956	0	0	0	2	0	k__Bacteria; p__Proteobacteria; c__Gammaproteobacteria; o__Pseudomonadales; f__Moraxellaceae; g__Acinetobacter; s__towneri
13687	0	0	0	2	0	k__Bacteria; p__Proteobacteria; c__Alphaproteobacteria; o__Sphingomonadales; f__Sphingomonadaceae; g__Sphingomonas; s__
2715960	6	0	0	1	13	k__Bacteria; p__Proteobacteria; c__Alphaproteobacteria; o__Hyphomicrobiales; f__Bradyrhizobiaceae; g__Bradyrhizobium; s__sp. PSBB068
1386	6	0	6	1	6	k__Bacteria; p__Firmicutes; c__Bacilli; o__Bacillales; f__Bacillaceae; g__Bacillus; s__
1716	0	0	0	1	5	k__Bacteria; p__Actinobacteria; c__Actinomycetia; o__Corynebacteriales; f__Corynebacteriaceae; g__Corynebacterium; s__
400634	0	0	1	1	4	k__Bacteria; p__Firmicutes; c__Bacilli; o__Bacillales; f__Bacillaceae; g__Lysinibacillus; s__
1219	2	0	1	1	3	k__Bacteria; p__Cyanobacteria; c__; o__Synechococcales; f__Prochloraceae; g__Prochlorococcus; s__marinus
1490	4	0	3	1	3	k__Bacteria; p__Firmicutes; c__Clostridia; o__Eubacteriales; f__Peptostreptococcaceae; g__Paraclostridium; s__bifermentans
32008	1	0	0	1	3	k__Bacteria; p__Proteobacteria; c__Betaproteobacteria; o__Burkholderiales; f__Burkholderiaceae; g__Burkholderia; s__
2057808	1	0	3	1	3	k__Bacteria; p__Bacteroidetes; c__Flavobacteriia; o__Flavobacteriales; f__Flavobacteriaceae; g__Lacinutrix; s__sp. Bg11-31
2764326	8	0	11	1	3	k__Bacteria; p__Fusobacteria; c__Fusobacteriia; o__Fusobacteriales; f__Fusobacteriaceae; g__Fusobacterium; s__sp. NSJ-57
1283	0	0	1	1	3	k__Bacteria; p__Firmicutes; c__Bacilli; o__Bacillales; f__Staphylococcaceae; g__Staphylococcus; s__haemolyticus
1396	8	0	6	1	2	k__Bacteria; p__Firmicutes; c__Bacilli; o__Bacillales; f__Bacillaceae; g__Bacillus; s__cereus
333962	4	0	0	1	2	k__Bacteria; p__Proteobacteria; c__Gammaproteobacteria; o__Enterobacterales; f__Morganellaceae; g__Providencia; s__heimbachae
40214	4	0	0	1	2	k__Bacteria; p__Proteobacteria; c__Gammaproteobacteria; o__Pseudomonadales; f__Moraxellaceae; g__Acinetobacter; s__johnsonii
108980	3	0	0	1	2	k__Bacteria; p__Proteobacteria; c__Gammaproteobacteria; o__Pseudomonadales; f__Moraxellaceae; g__Acinetobacter; s__ursingii
374106	1	0	0	1	2	k__Bacteria; p__Proteobacteria; c__Epsilonproteobacteria; o__Campylobacterales; f__Campylobacteraceae; g__Campylobacter; s__cuniculorum
2487072	3	0	4	1	2	k__Bacteria; p__Bacteroidetes; c__Flavobacteriia; o__Flavobacteriales; f__Weeksellaceae; g__Epilithonimonas; s__vandammei
2816908	0	0	1	1	2	k__Bacteria; p__Firmicutes; c__Tissierellia; o__Tissierellales; f__Peptoniphilaceae; g__Sedimentibacter; s__sp. zth1
38304	0	0	0	1	2	k__Bacteria; p__Actinobacteria; c__Actinomycetia; o__Corynebacteriales; f__Corynebacteriaceae; g__Corynebacterium; s__tuberculostearicum
544	0	0	0	1	2	k__Bacteria; p__Proteobacteria; c__Gammaproteobacteria; o__Enterobacterales; f__Enterobacteriaceae; g__Citrobacter; s__
297	0	0	0	1	2	k__Bacteria; p__Proteobacteria; c__Hydrogenophilalia; o__Hydrogenophilales; f__Hydrogenophilaceae; g__Hydrogenophilus; s__thermoluteolus
1581038	1	0	2	1	1	k__Bacteria; p__Firmicutes; c__Bacilli; o__Bacillales; f__Bacillaceae; g__Bacillus; s__sp. FJAT-22090
38875	1	0	0	1	1	k__Bacteria; p__Firmicutes; c__Bacilli; o__Bacillales; f__Bacillaceae; g__Bacillus; s__oleronius
182710	2	0	0	1	1	k__Bacteria; p__Firmicutes; c__Bacilli; o__Bacillales; f__Bacillaceae; g__Oceanobacillus; s__iheyensis
1215031	1	0	0	1	1	k__Bacteria; p__Firmicutes; c__Bacilli; o__Bacillales; f__Bacillaceae; g__Neobacillus; s__thermocopriae
2779445	1	0	1	1	1	k__Bacteria; p__Firmicutes; c__Clostridia; o__Eubacteriales; f__Clostridiaceae; g__Clostridium; s__sp. 'deep sea'
547	2	0	1	1	1	k__Bacteria; p__Proteobacteria; c__Gammaproteobacteria; o__Enterobacterales; f__Enterobacteriaceae; g__Enterobacter; s__
1382466	1	0	0	1	1	k__Bacteria; p__Bacteroidetes; c__Flavobacteriia; o__Flavobacteriales; f__Flavobacteriaceae; g__Winogradskyella; s__sediminis
34085	1	0	1	1	1	k__Bacteria; p__Bacteroidetes; c__Flavobacteriia; o__Flavobacteriales; f__Weeksellaceae; g__Riemerella; s__anatipestifer
247	1	0	0	1	1	k__Bacteria; p__Bacteroidetes; c__Flavobacteriia; o__Flavobacteriales; f__Weeksellaceae; g__Empedobacter; s__brevis
47466	3	0	1	1	1	k__Bacteria; p__Spirochaetes; c__Spirochaetia; o__Spirochaetales; f__Borreliaceae; g__Borrelia; s__miyamotoi
293091	2	0	3	1	1	k__Archaea; p__Euryarchaeota; c__Halobacteria; o__Haloferacales; f__Haloferacaceae; g__Haloquadratum; s__walsbyi
676	0	0	1	1	1	k__Bacteria; p__Proteobacteria; c__Gammaproteobacteria; o__Vibrionales; f__Vibrionaceae; g__Vibrio; s__fluvialis
712	0	0	1	1	1	k__Bacteria; p__Proteobacteria; c__Gammaproteobacteria; o__Pasteurellales; f__Pasteurellaceae; g__; s__
374	0	0	1	1	1	k__Bacteria; p__Proteobacteria; c__Alphaproteobacteria; o__Hyphomicrobiales; f__Bradyrhizobiaceae; g__Bradyrhizobium; s__
492670	0	0	2	1	1	k__Bacteria; p__Firmicutes; c__Bacilli; o__Bacillales; f__Bacillaceae; g__Bacillus; s__velezensis
90964	0	0	1	1	1	k__Bacteria; p__Firmicutes; c__Bacilli; o__Bacillales; f__Staphylococcaceae; g__; s__
53346	0	0	1	1	1	k__Bacteria; p__Firmicutes; c__Bacilli; o__Lactobacillales; f__Enterococcaceae; g__Enterococcus; s__mundtii
651561	0	0	1	1	1	k__Bacteria; p__Bacteroidetes; c__Flavobacteriia; o__Flavobacteriales; f__Weeksellaceae; g__Chryseobacterium; s__arthrosphaerae
237258	0	0	5	1	1	k__Bacteria; p__Bacteroidetes; c__Flavobacteriia; o__Flavobacteriales; f__Weeksellaceae; g__Cloacibacterium; s__normanense
2656761	0	0	3	1	1	k__Bacteria; p__Bacteroidetes; c__Flavobacteriia; o__Flavobacteriales; f__Weeksellaceae; g__Apibacter; s__sp. B2966
471223	0	0	0	1	1	k__Bacteria; p__Firmicutes; c__Bacilli; o__Bacillales; f__Bacillaceae; g__Geobacillus; s__sp. WCH70
2052660	0	0	0	1	1	k__Bacteria; p__Firmicutes; c__Bacilli; o__Bacillales; f__Bacillaceae; g__Oceanobacillus; s__zhaokaii
85006	0	0	0	1	1	k__Bacteria; p__Actinobacteria; c__Actinomycetia; o__Micrococcales; f__; g__; s__
571913	0	0	0	1	1	k__Bacteria; p__Actinobacteria; c__Actinomycetia; o__Micrococcales; f__Dermacoccaceae; g__Luteipulveratus; s__mongoliensis
29497	0	0	0	1	1	k__Bacteria; p__Proteobacteria; c__Gammaproteobacteria; o__Vibrionales; f__Vibrionaceae; g__Vibrio; s__splendidus
1030157	0	0	0	1	1	k__Bacteria; p__Proteobacteria; c__Alphaproteobacteria; o__Sphingomonadales; f__Sphingomonadaceae; g__Sphingomonas; s__sp. KC8
1843368	0	0	0	1	1	k__Bacteria; p__Proteobacteria; c__Alphaproteobacteria; o__Sphingomonadales; f__Sphingomonadaceae; g__Sphingobium; s__sp. RAC03
201	0	0	0	1	1	k__Bacteria; p__Proteobacteria; c__Epsilonproteobacteria; o__Campylobacterales; f__Campylobacteraceae; g__Campylobacter; s__lari
2321403	0	0	0	1	1	k__Bacteria; p__Bacteroidetes; c__Cytophagia; o__Cytophagales; f__Fulvivirgaceae; g__Chryseolinea; s__soli
147322	149	0	0	1	0	k__Bacteria; p__Cyanobacteria; c__; o__Oscillatoriales; f__Microcoleaceae; g__Limnospira; s__indica
1973486	2	0	1	1	0	k__Bacteria; p__Cyanobacteria; c__; o__Nostocales; f__Calotrichaceae; g__Calothrix; s__parasitica
32046	1	0	0	1	0	k__Bacteria; p__Cyanobacteria; c__; o__Synechococcales; f__Synechococcaceae; g__Synechococcus; s__elongatus
1303	1	0	1	1	0	k__Bacteria; p__Firmicutes; c__Bacilli; o__Lactobacillales; f__Streptococcaceae; g__Streptococcus; s__oralis
2610896	1	0	0	1	0	k__Bacteria; p__Firmicutes; c__Bacilli; o__Lactobacillales; f__Streptococcaceae; g__Streptococcus; s__sp. LPB0220
1328	1	0	0	1	0	k__Bacteria; p__Firmicutes; c__Bacilli; o__Lactobacillales; f__Streptococcaceae; g__Streptococcus; s__anginosus
1405	1	0	0	1	0	k__Bacteria; p__Firmicutes; c__Bacilli; o__Bacillales; f__Bacillaceae; g__Bacillus; s__mycoides
1421	4	0	1	1	0	k__Bacteria; p__Firmicutes; c__Bacilli; o__Bacillales; f__Bacillaceae; g__Lysinibacillus; s__sphaericus
29382	2	0	0	1	0	k__Bacteria; p__Firmicutes; c__Bacilli; o__Bacillales; f__Staphylococcaceae; g__Staphylococcus; s__cohnii
66219	1	0	1	1	0	k__Bacteria; p__Firmicutes; c__Clostridia; o__Eubacteriales; f__Lachnospiraceae; g__Lachnoclostridium; s__phytofermentans
1521	1	0	0	1	0	k__Bacteria; p__Firmicutes; c__Clostridia; o__Eubacteriales; f__Oscillospiraceae; g__Ruminiclostridium; s__cellulolyticum
1812935	1	0	0	1	0	k__Bacteria; p__Proteobacteria; c__Gammaproteobacteria; o__Enterobacterales; f__Enterobacteriaceae; g__Enterobacter; s__roggenkampii
43657	1	0	0	1	0	k__Bacteria; p__Proteobacteria; c__Gammaproteobacteria; o__Alteromonadales; f__Pseudoalteromonadaceae; g__Pseudoalteromonas; s__luteoviolacea
357794	1	0	0	1	0	k__Bacteria; p__Proteobacteria; c__Gammaproteobacteria; o__Alteromonadales; f__Psychromonadaceae; g__Psychromonas; s__ingrahamii
726	1	0	0	1	0	k__Bacteria; p__Proteobacteria; c__Gammaproteobacteria; o__Pasteurellales; f__Pasteurellaceae; g__Haemophilus; s__haemolyticus
714	1	0	0	1	0	k__Bacteria; p__Proteobacteria; c__Gammaproteobacteria; o__Pasteurellales; f__Pasteurellaceae; g__Aggregatibacter; s__actinomycetemcomitans
1630141	1	0	0	1	0	k__Bacteria; p__Proteobacteria; c__Gammaproteobacteria; o__Chromatiales; f__Chromatiaceae; g__Candidatus Nitrosoglobus; s__terrae
12916	3	0	0	1	0	k__Bacteria; p__Proteobacteria; c__Betaproteobacteria; o__Burkholderiales; f__Comamonadaceae; g__Acidovorax; s__
85643	1	0	0	1	0	k__Bacteria; p__Proteobacteria; c__Betaproteobacteria; o__Rhodocyclales; f__Zoogloeaceae; g__Thauera; s__sp. MZ1T
309868	3	0	0	1	0	k__Bacteria; p__Proteobacteria; c__Alphaproteobacteria; o__Hyphomicrobiales; f__Rhizobiaceae; g__Liberibacter; s__Candidatus Liberibacter americanus
2816454	1	0	0	1	0	k__Bacteria; p__Proteobacteria; c__Alphaproteobacteria; o__Hyphomicrobiales; f__Aurantimonadaceae; g__Aureimonas; s__sp. OT7
2654325	1	0	2	1	0	k__Bacteria; p__Bacteroidetes; c__Flavobacteriia; o__Flavobacteriales; f__Flavobacteriaceae; g__Flavobacterium; s__sp. xlx-214
2653681	1	0	1	1	0	k__Bacteria; p__Bacteroidetes; c__Flavobacteriia; o__Flavobacteriales; f__Flavobacteriaceae; g__Lacinutrix; s__sp. WUR7
2724619	2	0	0	1	0	k__Bacteria; p__Bacteroidetes; c__Flavobacteriia; o__Flavobacteriales; f__Weeksellaceae; g__Chryseobacterium; s__sp. NEB161
34098	1	0	0	1	0	k__Bacteria; p__Bacteroidetes; c__Flavobacteriia; o__Flavobacteriales; f__Blattabacteriaceae; g__Blattabacterium; s__
2590900	1	0	0	1	0	k__Bacteria; p__Bacteroidetes; c__Bacteroidia; o__Bacteroidales; f__Tenuifilaceae; g__Tenuifilum; s__thalassicum
591197	1	0	0	1	0	k__Bacteria; p__Ignavibacteriae; c__Ignavibacteria; o__Ignavibacteriales; f__Ignavibacteriaceae; g__Ignavibacterium; s__album
856	1	0	10	1	0	k__Bacteria; p__Fusobacteria; c__Fusobacteriia; o__Fusobacteriales; f__Fusobacteriaceae; g__Fusobacterium; s__varium
157687	3	0	1	1	0	k__Bacteria; p__Fusobacteria; c__Fusobacteriia; o__Fusobacteriales; f__Leptotrichiaceae; g__Leptotrichia; s__wadei
1789762	1	0	0	1	0	k__Archaea; p__Euryarchaeota; c__Methanobacteria; o__Methanobacteriales; f__Methanobacteriaceae; g__Methanosphaera; s__sp. BMS
280036	0	0	1	1	0	k__Eukaryota; p__Basidiomycota; c__Ustilaginomycetes; o__Ustilaginales; f__Ustilaginaceae; g__Sporisorium; s__graminicola
182141	0	0	1	1	0	k__Bacteria; p__Proteobacteria; c__Gammaproteobacteria; o__Alteromonadales; f__Pseudoalteromonadaceae; g__Pseudoalteromonas; s__prydzensis
1935204	0	0	1	1	0	k__Bacteria; p__Proteobacteria; c__Epsilonproteobacteria; o__Campylobacterales; f__Campylobacteraceae; g__Aliarcobacter; s__[Arcobacter] porcinus
1054034	0	0	1	1	0	k__Bacteria; p__Proteobacteria; c__Epsilonproteobacteria; o__Campylobacterales; f__Campylobacteraceae; g__Arcobacter; s__cloacae
197482	0	0	1	1	0	k__Bacteria; p__Proteobacteria; c__Epsilonproteobacteria; o__Campylobacterales; f__Campylobacteraceae; g__Malaciobacter; s__halophilus
1465	0	0	2	1	0	k__Bacteria; p__Firmicutes; c__Bacilli; o__Bacillales; f__Paenibacillaceae; g__Brevibacillus; s__laterosporus
29552	0	0	2	1	0	k__Bacteria; p__Tenericutes; c__Mollicutes; o__Acholeplasmatales; f__Acholeplasmataceae; g__Acholeplasma; s__axanthum
289435	0	0	2	1	0	k__Bacteria; p__Cyanobacteria; c__; o__Nostocales; f__Aphanizomenonaceae; g__Sphaerospermopsis; s__kisseleviana
2546359	0	0	1	1	0	k__Bacteria; p__Cyanobacteria; c__; o__Chroococcales; f__Aphanothecaceae; g__Gloeothece; s__verrucosa
59600	0	0	1	1	0	k__Bacteria; p__Bacteroidetes; c__Flavobacteriia; o__Flavobacteriales; f__Flavobacteriaceae; g__Cellulophaga; s__algicola
1016	0	0	1	1	0	k__Bacteria; p__Bacteroidetes; c__Flavobacteriia; o__Flavobacteriales; f__Flavobacteriaceae; g__Capnocytophaga; s__
644281	0	0	1	1	0	k__Archaea; p__Euryarchaeota; c__Methanococci; o__Methanococcales; f__Methanocaldococcaceae; g__Methanocaldococcus; s__sp. FS406-22
2850	0	0	0	1	0	k__Eukaryota; p__Bacillariophyta; c__Bacillariophyceae; o__Naviculales; f__Phaeodactylaceae; g__Phaeodactylum; s__tricornutum
1813182	0	0	0	1	0	k__Bacteria; p__Firmicutes; c__Bacilli; o__Bacillales; f__Bacillaceae; g__Geobacillus; s__sp. JS12
1963025	0	0	0	1	0	k__Bacteria; p__Firmicutes; c__Bacilli; o__Bacillales; f__Bacillaceae; g__Geobacillus; s__sp. 46C-IIa
1740721	0	0	0	1	0	k__Bacteria; p__Firmicutes; c__Bacilli; o__Bacillales; f__Bacillaceae; g__Neobacillus; s__cucumis
1536774	0	0	0	1	0	k__Bacteria; p__Firmicutes; c__Bacilli; o__Bacillales; f__Paenibacillaceae; g__Paenibacillus; s__sp. FSL H7-0357
2728023	0	0	0	1	0	k__Bacteria; p__Firmicutes; c__Bacilli; o__Bacillales; f__Paenibacillaceae; g__Cohnella; s__sp. MFER-1
712623	0	0	0	1	0	k__Bacteria; p__Firmicutes; c__Bacilli; o__Lactobacillales; f__Streptococcaceae; g__Streptococcus; s__sp. oral taxon 061
1759399	0	0	0	1	0	k__Bacteria; p__Firmicutes; c__Bacilli; o__Lactobacillales; f__Streptococcaceae; g__Streptococcus; s__sp. A12
257758	0	0	0	1	0	k__Bacteria; p__Firmicutes; c__Bacilli; o__Lactobacillales; f__Streptococcaceae; g__Streptococcus; s__pseudopneumoniae
1318	0	0	0	1	0	k__Bacteria; p__Firmicutes; c__Bacilli; o__Lactobacillales; f__Streptococcaceae; g__Streptococcus; s__parasanguinis
2714036	0	0	0	1	0	k__Bacteria; p__Firmicutes; c__Bacilli; o__Lactobacillales; f__Lactobacillaceae; g__Companilactobacillus; s__pabuli
1138822	0	0	0	1	0	k__Bacteria; p__Firmicutes; c__Bacilli; o__Lactobacillales; f__Lactobacillaceae; g__Lentilactobacillus; s__curieae
1247	0	0	0	1	0	k__Bacteria; p__Firmicutes; c__Bacilli; o__Lactobacillales; f__Lactobacillaceae; g__Oenococcus; s__oeni
1375	0	0	0	1	0	k__Bacteria; p__Firmicutes; c__Bacilli; o__Lactobacillales; f__Aerococcaceae; g__Aerococcus; s__
143361	0	0	0	1	0	k__Bacteria; p__Firmicutes; c__Clostridia; o__Eubacteriales; f__Peptostreptococcaceae; g__Filifactor; s__alocis
356322	0	0	0	1	0	k__Bacteria; p__Firmicutes; c__Clostridia; o__Eubacteriales; f__Heliobacteriaceae; g__Heliorestis; s__convoluta
2682456	0	0	0	1	0	k__Bacteria; p__Firmicutes; c__Negativicutes; o__Veillonellales; f__Veillonellaceae; g__Veillonella; s__nakazawae
33011	0	0	0	1	0	k__Bacteria; p__Actinobacteria; c__Actinomycetia; o__Propionibacteriales; f__Propionibacteriaceae; g__Cutibacterium; s__granulosum
43675	0	0	0	1	0	k__Bacteria; p__Actinobacteria; c__Actinomycetia; o__Micrococcales; f__Micrococcaceae; g__Rothia; s__mucilaginosa
169480	0	0	0	1	0	k__Bacteria; p__Actinobacteria; c__Actinomycetia; o__Micrococcales; f__Micrococcaceae; g__Rothia; s__amarae
43769	0	0	0	1	0	k__Bacteria; p__Actinobacteria; c__Actinomycetia; o__Corynebacteriales; f__Corynebacteriaceae; g__Corynebacterium; s__propinquum
1727	0	0	0	1	0	k__Bacteria; p__Actinobacteria; c__Actinomycetia; o__Corynebacteriales; f__Corynebacteriaceae; g__Corynebacterium; s__variabile
1653480	0	0	0	1	0	k__Bacteria; p__Actinobacteria; c__Actinomycetia; o__Pseudonocardiales; f__Pseudonocardiaceae; g__Alloactinosynnema; s__sp. L-07
281472	0	0	0	1	0	k__Bacteria; p__Actinobacteria; c__Actinomycetia; o__Jiangellales; f__Jiangellaceae; g__Jiangella; s__
1182	0	0	0	1	0	k__Bacteria; p__Cyanobacteria; c__; o__Nostocales; f__Scytonemataceae; g__; s__
1137095	0	0	0	1	0	k__Bacteria; p__Cyanobacteria; c__; o__Nostocales; f__Scytonemataceae; g__Scytonema; s__sp. HK-05
1954171	0	0	0	1	0	k__Bacteria; p__Cyanobacteria; c__; o__Nostocales; f__Calotrichaceae; g__Calothrix; s__sp. NIES-2098
2576903	0	0	0	1	0	k__Bacteria; p__Cyanobacteria; c__; o__Nostocales; f__Nostocaceae; g__Nostoc; s__sp. C057
32052	0	0	0	1	0	k__Bacteria; p__Cyanobacteria; c__; o__Synechococcales; f__Synechococcaceae; g__Synechococcus; s__sp. WH 8020
2115	0	0	0	1	0	k__Bacteria; p__Tenericutes; c__Mollicutes; o__Mycoplasmatales; f__Mycoplasmataceae; g__Mycoplasmopsis; s__Mycoplasma fermentans
29561	0	0	0	1	0	k__Bacteria; p__Tenericutes; c__Mollicutes; o__Mycoplasmatales; f__Mycoplasmataceae; g__Mycoplasmopsis; s__Mycoplasma meleagridis
216964	0	0	0	1	0	k__Bacteria; p__Tenericutes; c__Mollicutes; o__Entomoplasmatales; f__Spiroplasmataceae; g__Spiroplasma; s__sp. BIUS-1
2675795	0	0	0	1	0	k__Bacteria; p__Proteobacteria; c__Gammaproteobacteria; o__Enterobacterales; f__Enterobacteriaceae; g__Escherichia; s__Enterobacteriaceae endosymbiont of Plateumaris pusilla
2675791	0	0	0	1	0	k__Bacteria; p__Proteobacteria; c__Gammaproteobacteria; o__Enterobacterales; f__Enterobacteriaceae; g__Escherichia; s__Enterobacteriaceae endosymbiont of Macroplea mutica
563	0	0	0	1	0	k__Bacteria; p__Proteobacteria; c__Gammaproteobacteria; o__Enterobacterales; f__Enterobacteriaceae; g__Shimwellia; s__blattae
183417	0	0	0	1	0	k__Bacteria; p__Proteobacteria; c__Gammaproteobacteria; o__Enterobacterales; f__Morganellaceae; g__Proteus; s__hauseri
34038	0	0	0	1	0	k__Bacteria; p__Proteobacteria; c__Gammaproteobacteria; o__Enterobacterales; f__Yersiniaceae; g__Rahnella; s__aquatilis
70346	0	0	0	1	0	k__Bacteria; p__Proteobacteria; c__Gammaproteobacteria; o__Pseudomonadales; f__Moraxellaceae; g__Acinetobacter; s__variabilis
45610	0	0	0	1	0	k__Bacteria; p__Proteobacteria; c__Gammaproteobacteria; o__Pseudomonadales; f__Moraxellaceae; g__Psychrobacter; s__urativorans
135621	0	0	0	1	0	k__Bacteria; p__Proteobacteria; c__Gammaproteobacteria; o__Pseudomonadales; f__Pseudomonadaceae; g__; s__
1898684	0	0	0	1	0	k__Bacteria; p__Proteobacteria; c__Gammaproteobacteria; o__Pseudomonadales; f__Pseudomonadaceae; g__Pseudomonas; s__sp. LPH1
47885	0	0	0	1	0	k__Bacteria; p__Proteobacteria; c__Gammaproteobacteria; o__Pseudomonadales; f__Pseudomonadaceae; g__Pseudomonas; s__oryzihabitans
353	0	0	0	1	0	k__Bacteria; p__Proteobacteria; c__Gammaproteobacteria; o__Pseudomonadales; f__Pseudomonadaceae; g__Azotobacter; s__chroococcum
197222	0	0	0	1	0	k__Bacteria; p__Proteobacteria; c__Gammaproteobacteria; o__Alteromonadales; f__Alteromonadaceae; g__Paraglaciecola; s__mesophila
58049	0	0	0	1	0	k__Bacteria; p__Proteobacteria; c__Gammaproteobacteria; o__Alteromonadales; f__Colwelliaceae; g__Colwellia; s__sp. MT41
651	0	0	0	1	0	k__Bacteria; p__Proteobacteria; c__Gammaproteobacteria; o__Aeromonadales; f__Aeromonadaceae; g__Aeromonas; s__media
2306583	0	0	0	1	0	k__Bacteria; p__Proteobacteria; c__Gammaproteobacteria; o__Oceanospirillales; f__Halomonadaceae; g__Halomonas; s__sp. JS92-SW72
1267021	0	0	0	1	0	k__Bacteria; p__Proteobacteria; c__Gammaproteobacteria; o__Orbales; f__Orbaceae; g__Frischella; s__perrara
47671	0	0	0	1	0	k__Bacteria; p__Proteobacteria; c__Betaproteobacteria; o__Burkholderiales; f__Burkholderiaceae; g__Lautropia; s__mirabilis
1842537	0	0	0	1	0	k__Bacteria; p__Proteobacteria; c__Betaproteobacteria; o__Burkholderiales; f__Comamonadaceae; g__Hydrogenophaga; s__sp. RAC07
2714925	0	0	0	1	0	k__Bacteria; p__Proteobacteria; c__Betaproteobacteria; o__Burkholderiales; f__Comamonadaceae; g__Diaphorobacter; s__sp. HDW4B
149698	0	0	0	1	0	k__Bacteria; p__Proteobacteria; c__Betaproteobacteria; o__Burkholderiales; f__Oxalobacteraceae; g__Massilia; s__
2601898	0	0	0	1	0	k__Bacteria; p__Proteobacteria; c__Betaproteobacteria; o__Burkholderiales; f__Oxalobacteraceae; g__Noviherbaspirillum; s__sp. UKPF54
1658665	0	0	0	1	0	k__Bacteria; p__Proteobacteria; c__Betaproteobacteria; o__Burkholderiales; f__Oxalobacteraceae; g__Mitsuaria; s__sp. 7
206351	0	0	0	1	0	k__Bacteria; p__Proteobacteria; c__Betaproteobacteria; o__Neisseriales; f__; g__; s__
1537400	0	0	0	1	0	k__Bacteria; p__Proteobacteria; c__Betaproteobacteria; o__Neisseriales; f__Chromobacteriaceae; g__Aquitalea; s__aquatilis
2005884	0	0	0	1	0	k__Bacteria; p__Proteobacteria; c__Betaproteobacteria; o__Rhodocyclales; f__Zoogloeaceae; g__Thauera; s__sp. K11
153948	0	0	0	1	0	k__Bacteria; p__Proteobacteria; c__Betaproteobacteria; o__Nitrosomonadales; f__Nitrosomonadaceae; g__Nitrosomonas; s__sp. AL212
1355477	0	0	0	1	0	k__Bacteria; p__Proteobacteria; c__Alphaproteobacteria; o__Hyphomicrobiales; f__Bradyrhizobiaceae; g__Bradyrhizobium; s__diazoefficiens
1427356	0	0	0	1	0	k__Bacteria; p__Proteobacteria; c__Alphaproteobacteria; o__Hyphomicrobiales; f__Hyphomicrobiaceae; g__Hyphomicrobium; s__nitrativorans
2219696	0	0	0	1	0	k__Bacteria; p__Proteobacteria; c__Alphaproteobacteria; o__Sphingomonadales; f__Sphingomonadaceae; g__Sphingomonas; s__sp. FARSPH
2714944	0	0	0	1	0	k__Bacteria; p__Proteobacteria; c__Alphaproteobacteria; o__Sphingomonadales; f__Sphingomonadaceae; g__Sphingomonas; s__sp. HDW15C
784	0	0	0	1	0	k__Bacteria; p__Proteobacteria; c__Alphaproteobacteria; o__Rickettsiales; f__Rickettsiaceae; g__Orientia; s__tsutsugamushi
1002672	0	0	0	1	0	k__Bacteria; p__Proteobacteria; c__Alphaproteobacteria; o__Pelagibacterales; f__Pelagibacteraceae; g__Candidatus Pelagibacter; s__sp. IMCC9063
2500532	0	0	0	1	0	k__Bacteria; p__Proteobacteria; c__Alphaproteobacteria; o__Rhodobacterales; f__Rhodobacteraceae; g__Paracoccus; s__sp. Arc7-R13
44674	0	0	0	1	0	k__Bacteria; p__Proteobacteria; c__Epsilonproteobacteria; o__Campylobacterales; f__Campylobacteraceae; g__Sulfurospirillum; s__barnesii
387093	0	0	0	1	0	k__Bacteria; p__Proteobacteria; c__Epsilonproteobacteria; o__Campylobacterales; f__Sulfurovaceae; g__Sulfurovum; s__sp. NBC37-1
266749	0	0	0	1	0	k__Bacteria; p__Bacteroidetes; c__Flavobacteriia; o__Flavobacteriales; f__Weeksellaceae; g__Kaistella; s__jeonii
76831	0	0	0	1	0	k__Bacteria; p__Bacteroidetes; c__Flavobacteriia; o__Flavobacteriales; f__Flavobacteriaceae; g__Myroides; s__
28111	0	0	0	1	0	k__Bacteria; p__Bacteroidetes; c__Bacteroidia; o__Bacteroidales; f__Bacteroidaceae; g__Bacteroides; s__eggerthii
2057025	0	0	0	1	0	k__Bacteria; p__Bacteroidetes; c__Cytophagia; o__Cytophagales; f__Cytophagaceae; g__Spirosoma; s__pollinicola
1006576	0	0	0	1	0	k__Bacteria; p__Thermotogae; c__Thermotogae; o__Petrotogales; f__Petrotogaceae; g__Defluviitoga; s__tunisiensis
67760	0	0	0	1	0	k__Archaea; p__Euryarchaeota; c__Methanococci; o__Methanococcales; f__Methanocaldococcaceae; g__Methanocaldococcus; s__infernus
1434103	0	0	0	1	0	k__Archaea; p__Euryarchaeota; c__Methanomicrobia; o__Methanosarcinales; f__Methanosarcinaceae; g__Methanosarcina; s__sp. WWM596
1582439	0	0	0	1	0	k__Archaea; p__Thaumarchaeota; c__; o__Nitrosopumilales; f__Nitrosopumilaceae; g__Nitrosopumilus; s__piranensis
50292	0	0	0	1	0	k__Viruses; p__Peploviricota; c__Herviviricetes; o__Herpesvirales; f__Herpesviridae; g__Cytomegalovirus; s__Cercopithecine betaherpesvirus 5
29250	0	0	0	1	0	k__Viruses; p__Peploviricota; c__Herviviricetes; o__Herpesvirales; f__Nudiviridae; g__Betanudivirus; s__Heliothis zea nudivirus
33958	1021	0	0	0	133	k__Bacteria; p__Firmicutes; c__Bacilli; o__Lactobacillales; f__Lactobacillaceae; g__; s__
2767842	59	0	0	0	11	k__Bacteria; p__Firmicutes; c__Bacilli; o__Lactobacillales; f__Lactobacillaceae; g__Lactiplantibacillus; s__
29388	6	0	0	0	8	k__Bacteria; p__Firmicutes; c__Bacilli; o__Bacillales; f__Staphylococcaceae; g__Staphylococcus; s__capitis
1385	1	0	3	0	6	k__Bacteria; p__Firmicutes; c__Bacilli; o__Bacillales; f__; g__; s__
1980674	4	0	1	0	6	k__Bacteria; p__Firmicutes; c__Bacilli; o__Bacillales; f__Paenibacillaceae; g__Paenibacillus; s__sp. Cedars
119060	1	0	0	0	5	k__Bacteria; p__Proteobacteria; c__Betaproteobacteria; o__Burkholderiales; f__Burkholderiaceae; g__; s__
2572594	3	0	1	0	5	k__Bacteria; p__Bacteroidetes; c__Flavobacteriia; o__Flavobacteriales; f__Flavobacteriaceae; g__Myroides; s__fluvii
2005456	5	0	0	0	4	k__Bacteria; p__Cyanobacteria; c__; o__Nostocales; f__Hapalosiphonaceae; g__Fischerella; s__sp. NIES-4106
44008	1	0	0	0	3	k__Bacteria; p__Firmicutes; c__Bacilli; o__Lactobacillales; f__Enterococcaceae; g__Enterococcus; s__cecorum
2143	2	0	1	0	3	k__Bacteria; p__Tenericutes; c__Mollicutes; o__Entomoplasmatales; f__Spiroplasmataceae; g__Spiroplasma; s__gladiatoris
1922217	2	0	6	0	3	k__Bacteria; p__Proteobacteria; c__Gammaproteobacteria; o__Enterobacterales; f__Erwiniaceae; g__Erwinia; s__Candidatus Erwinia haradaeae
339	1	0	1	0	3	k__Bacteria; p__Proteobacteria; c__Gammaproteobacteria; o__Xanthomonadales; f__Xanthomonadaceae; g__Xanthomonas; s__campestris
1662285	2	0	1	0	3	k__Bacteria; p__Proteobacteria; c__Betaproteobacteria; o__Nitrosomonadales; f__Methylophilaceae; g__Methylophilus; s__sp. TWE2
1624	0	0	0	0	3	k__Bacteria; p__Firmicutes; c__Bacilli; o__Lactobacillales; f__Lactobacillaceae; g__Ligilactobacillus; s__salivarius
729	0	0	0	0	3	k__Bacteria; p__Proteobacteria; c__Gammaproteobacteria; o__Pasteurellales; f__Pasteurellaceae; g__Haemophilus; s__parainfluenzae
2268451	0	0	0	0	3	k__Bacteria; p__Proteobacteria; c__Alphaproteobacteria; o__Pelagibacterales; f__Pelagibacteraceae; g__Candidatus Pelagibacter; s__sp. FZCC0015
34105	0	0	0	0	3	k__Bacteria; p__Fusobacteria; c__Fusobacteriia; o__Fusobacteriales; f__Leptotrichiaceae; g__Streptobacillus; s__moniliformis
264686	3	0	0	0	2	k__Bacteria; p__Cyanobacteria; c__; o__Nostocales; f__Nostocaceae; g__Nostoc; s__edaphicum
446679	1	0	0	0	2	k__Bacteria; p__Cyanobacteria; c__; o__Nostocales; f__Nostocaceae; g__Nostoc; s__sphaeroides
1305	2	0	0	0	2	k__Bacteria; p__Firmicutes; c__Bacilli; o__Lactobacillales; f__Streptococcaceae; g__Streptococcus; s__sanguinis
53345	2	0	2	0	2	k__Bacteria; p__Firmicutes; c__Bacilli; o__Lactobacillales; f__Enterococcaceae; g__Enterococcus; s__durans
1351	1	0	1	0	2	k__Bacteria; p__Firmicutes; c__Bacilli; o__Lactobacillales; f__Enterococcaceae; g__Enterococcus; s__faecalis
33028	4	0	0	0	2	k__Bacteria; p__Firmicutes; c__Bacilli; o__Bacillales; f__Staphylococcaceae; g__Staphylococcus; s__saccharolyticus
1292	2	0	0	0	2	k__Bacteria; p__Firmicutes; c__Bacilli; o__Bacillales; f__Staphylococcaceae; g__Staphylococcus; s__warneri
36745	4	0	2	0	2	k__Bacteria; p__Firmicutes; c__Clostridia; o__Eubacteriales; f__Clostridiaceae; g__Clostridium; s__saccharoperbutylacetonicum
29341	2	0	1	0	2	k__Bacteria; p__Firmicutes; c__Clostridia; o__Eubacteriales; f__Clostridiaceae; g__Clostridium; s__argentinense
94869	1	0	3	0	2	k__Bacteria; p__Firmicutes; c__Clostridia; o__Eubacteriales; f__Clostridiaceae; g__Clostridium; s__gasigenes
186804	1	0	4	0	2	k__Bacteria; p__Firmicutes; c__Clostridia; o__Eubacteriales; f__Peptostreptococcaceae; g__; s__
44000	1	0	0	0	2	k__Bacteria; p__Firmicutes; c__Clostridia; o__Thermoanaerobacterales; f__Thermoanaerobacterales Family III. Incertae Sedis; g__Caldicellulosiruptor; s__
1912216	1	0	0	0	2	k__Bacteria; p__Actinobacteria; c__Actinomycetia; o__Propionibacteriales; f__Propionibacteriaceae; g__Cutibacterium; s__
672	2	0	0	0	2	k__Bacteria; p__Proteobacteria; c__Gammaproteobacteria; o__Vibrionales; f__Vibrionaceae; g__Vibrio; s__vulnificus
28087	1	0	0	0	2	k__Bacteria; p__Proteobacteria; c__Gammaproteobacteria; o__Legionellales; f__Legionellaceae; g__Legionella; s__sainthelensi
2028343	1	0	0	0	2	k__Bacteria; p__Proteobacteria; c__Alphaproteobacteria; o__Hyphomicrobiales; f__Rhizobiaceae; g__Rhizobium; s__sp. 11515TR
165695	2	0	0	0	2	k__Bacteria; p__Proteobacteria; c__Alphaproteobacteria; o__Sphingomonadales; f__Sphingomonadaceae; g__Sphingobium; s__
1500960	1	0	1	0	2	k__Bacteria; p__Proteobacteria; c__Epsilonproteobacteria; o__Campylobacterales; f__Campylobacteraceae; g__Campylobacter; s__sp. RM16704
2748319	4	0	2	0	2	k__Bacteria; p__Bacteroidetes; c__Flavobacteriia; o__Flavobacteriales; f__Flavobacteriaceae; g__Flavobacterium; s__sp. I3-2
2058137	1	0	1	0	2	k__Bacteria; p__Bacteroidetes; c__Flavobacteriia; o__Flavobacteriales; f__Flavobacteriaceae; g__Polaribacter; s__sp. ALD11
250	2	0	0	0	2	k__Bacteria; p__Bacteroidetes; c__Flavobacteriia; o__Flavobacteriales; f__Weeksellaceae; g__Chryseobacterium; s__gleum
28454	1	0	0	0	2	k__Bacteria; p__Bacteroidetes; c__Sphingobacteriia; o__Sphingobacteriales; f__Sphingobacteriaceae; g__Sphingobacterium; s__multivorum
849	1	0	1	0	2	k__Bacteria; p__Fusobacteria; c__Fusobacteriia; o__Fusobacteriales; f__Fusobacteriaceae; g__Fusobacterium; s__gonidiaformans
2663009	1	0	2	0	2	k__Bacteria; p__Fusobacteria; c__Fusobacteriia; o__Fusobacteriales; f__Fusobacteriaceae; g__Fusobacterium; s__pseudoperiodonticum
173	1	0	4	0	2	k__Bacteria; p__Spirochaetes; c__Spirochaetia; o__Leptospirales; f__Leptospiraceae; g__Leptospira; s__interrogans
187218	1	0	0	0	2	k__Viruses; p__Uroviricota; c__Caudoviricetes; o__Caudovirales; f__Demerecviridae; g__Tequintavirus; s__
303	0	0	1	0	2	k__Bacteria; p__Proteobacteria; c__Gammaproteobacteria; o__Pseudomonadales; f__Pseudomonadaceae; g__Pseudomonas; s__putida
675	0	0	2	0	2	k__Bacteria; p__Proteobacteria; c__Gammaproteobacteria; o__Vibrionales; f__Vibrionaceae; g__Vibrio; s__cincinnatiensis
1032072	0	0	1	0	2	k__Bacteria; p__Proteobacteria; c__Epsilonproteobacteria; o__Campylobacterales; f__Campylobacteraceae; g__Malaciobacter; s__molluscorum
1404	0	0	5	0	2	k__Bacteria; p__Firmicutes; c__Bacilli; o__Bacillales; f__Bacillaceae; g__Priestia; s__megaterium
186803	0	0	1	0	2	k__Bacteria; p__Firmicutes; c__Clostridia; o__Eubacteriales; f__Lachnospiraceae; g__; s__
28903	0	0	1	0	2	k__Bacteria; p__Tenericutes; c__Mollicutes; o__Mycoplasmatales; f__Mycoplasmataceae; g__Mycoplasmopsis; s__Mycoplasma bovis
2133	0	0	1	0	2	k__Bacteria; p__Tenericutes; c__Mollicutes; o__Entomoplasmatales; f__Spiroplasmataceae; g__Spiroplasma; s__citri
5052	0	0	0	0	2	k__Eukaryota; p__Ascomycota; c__Eurotiomycetes; o__Eurotiales; f__Aspergillaceae; g__Aspergillus; s__
1817405	0	0	0	0	2	k__Bacteria; p__Firmicutes; c__Bacilli; o__Bacillales; f__Staphylococcaceae; g__Abyssicoccus; s__albus
1604	0	0	0	0	2	k__Bacteria; p__Firmicutes; c__Bacilli; o__Lactobacillales; f__Lactobacillaceae; g__Lactobacillus; s__amylovorus
1302	0	0	0	0	2	k__Bacteria; p__Firmicutes; c__Bacilli; o__Lactobacillales; f__Streptococcaceae; g__Streptococcus; s__gordonii
1550240	0	0	0	0	2	k__Bacteria; p__Firmicutes; c__Clostridia; o__Thermoanaerobacterales; f__Thermoanaerobacterales Family III. Incertae Sedis; g__Thermoanaerobacterium; s__sp. RBIITD
2047	0	0	0	0	2	k__Bacteria; p__Actinobacteria; c__Actinomycetia; o__Micrococcales; f__Micrococcaceae; g__Rothia; s__dentocariosa
1725	0	0	0	0	2	k__Bacteria; p__Actinobacteria; c__Actinomycetia; o__Corynebacteriales; f__Corynebacteriaceae; g__Corynebacterium; s__xerosis
29555	0	0	0	0	2	k__Bacteria; p__Tenericutes; c__Mollicutes; o__Mycoplasmatales; f__Mycoplasmataceae; g__Mycoplasmopsis; s__Mycoplasma canis
38986	0	0	0	0	2	k__Bacteria; p__Tenericutes; c__Mollicutes; o__Acholeplasmatales; f__Acholeplasmataceae; g__Acholeplasma; s__palmae
83655	0	0	0	0	2	k__Bacteria; p__Proteobacteria; c__Gammaproteobacteria; o__Enterobacterales; f__Enterobacteriaceae; g__Leclercia; s__adecarboxylata
613	0	0	0	0	2	k__Bacteria; p__Proteobacteria; c__Gammaproteobacteria; o__Enterobacterales; f__Yersiniaceae; g__Serratia; s__
407	0	0	0	0	2	k__Bacteria; p__Proteobacteria; c__Alphaproteobacteria; o__Hyphomicrobiales; f__Methylobacteriaceae; g__Methylobacterium; s__
14	0	0	0	0	2	k__Bacteria; p__Dictyoglomi; c__Dictyoglomia; o__Dictyoglomales; f__Dictyoglomaceae; g__Dictyoglomus; s__thermophilum
1615909	1	0	1	0	1	k__Bacteria; p__Cyanobacteria; c__; o__Chroococcales; f__Chroococcaceae; g__Geminocystis; s__sp. NIES-3708
1161	2	0	2	0	1	k__Bacteria; p__Cyanobacteria; c__; o__Nostocales; f__; g__; s__
1255	1	0	0	0	1	k__Bacteria; p__Firmicutes; c__Bacilli; o__Lactobacillales; f__Lactobacillaceae; g__Pediococcus; s__pentosaceus
1612	1	0	0	0	1	k__Bacteria; p__Firmicutes; c__Bacilli; o__Lactobacillales; f__Lactobacillaceae; g__Companilactobacillus; s__farciminis
149016	2	0	0	0	1	k__Bacteria; p__Firmicutes; c__Bacilli; o__Lactobacillales; f__Streptococcaceae; g__Streptococcus; s__urinalis
2173853	1	0	0	0	1	k__Bacteria; p__Firmicutes; c__Bacilli; o__Lactobacillales; f__Streptococcaceae; g__Streptococcus; s__chenjunshii
102684	1	0	0	0	1	k__Bacteria; p__Firmicutes; c__Bacilli; o__Lactobacillales; f__Streptococcaceae; g__Streptococcus; s__infantarius
1359	1	0	1	0	1	k__Bacteria; p__Firmicutes; c__Bacilli; o__Lactobacillales; f__Streptococcaceae; g__Lactococcus; s__cremoris
118060	1	0	1	0	1	k__Bacteria; p__Firmicutes; c__Bacilli; o__Lactobacillales; f__Enterococcaceae; g__Enterococcus; s__rotai
199441	1	0	0	0	1	k__Bacteria; p__Firmicutes; c__Bacilli; o__Bacillales; f__Bacillaceae; g__Alkalihalobacillus; s__krulwichiae
746691	2	0	1	0	1	k__Bacteria; p__Firmicutes; c__Bacilli; o__Bacillales; f__Bacillaceae; g__Oceanobacillus; s__kimchii
84406	1	0	0	0	1	k__Bacteria; p__Firmicutes; c__Bacilli; o__Bacillales; f__Bacillaceae; g__Virgibacillus; s__
35841	1	0	1	0	1	k__Bacteria; p__Firmicutes; c__Bacilli; o__Bacillales; f__Bacillaceae; g__Caldibacillus; s__thermoamylovorans
2777185	1	0	0	0	1	k__Bacteria; p__Firmicutes; c__Bacilli; o__Bacillales; f__Bacillaceae; g__Pontibacillus; s__sp. ALD_SL1
246432	2	0	0	0	1	k__Bacteria; p__Firmicutes; c__Bacilli; o__Bacillales; f__Staphylococcaceae; g__Staphylococcus; s__equorum
2044912	1	0	2	0	1	k__Bacteria; p__Firmicutes; c__Bacilli; o__Bacillales; f__Staphylococcaceae; g__Staphylococcus; s__debuckii
1526927	1	0	0	0	1	k__Bacteria; p__Firmicutes; c__Bacilli; o__Bacillales; f__Planococcaceae; g__Planococcus; s__sp. PAMC 21323
1571	1	0	1	0	1	k__Bacteria; p__Firmicutes; c__Bacilli; o__Bacillales; f__Planococcaceae; g__Sporosarcina; s__ureae
2048654	1	0	0	0	1	k__Bacteria; p__Firmicutes; c__Bacilli; o__Bacillales; f__Planococcaceae; g__Solibacillus; s__sp. R5-41
1639	1	0	2	0	1	k__Bacteria; p__Firmicutes; c__Bacilli; o__Bacillales; f__Listeriaceae; g__Listeria; s__monocytogenes
46867	2	0	5	0	1	k__Bacteria; p__Firmicutes; c__Clostridia; o__Eubacteriales; f__Clostridiaceae; g__Clostridium; s__chauvoei
394958	1	0	2	0	1	k__Bacteria; p__Firmicutes; c__Clostridia; o__Eubacteriales; f__Clostridiaceae; g__Clostridium; s__taeniosporum
1509	1	0	0	0	1	k__Bacteria; p__Firmicutes; c__Clostridia; o__Eubacteriales; f__Clostridiaceae; g__Clostridium; s__sporogenes
2726954	2	0	1	0	1	k__Bacteria; p__Firmicutes; c__Clostridia; o__Eubacteriales; f__Clostridiaceae; g__Sarcina; s__sp. JB2
2599308	2	0	0	0	1	k__Bacteria; p__Firmicutes; c__Clostridia; o__Eubacteriales; f__Clostridiaceae; g__Crassaminicella; s__sp. SY095
1115758	2	0	1	0	1	k__Bacteria; p__Firmicutes; c__Clostridia; o__Eubacteriales; f__Peptostreptococcaceae; g__Romboutsia; s__ilealis
1507512	2	0	5	0	1	k__Bacteria; p__Firmicutes; c__Clostridia; o__Eubacteriales; f__Peptostreptococcaceae; g__Romboutsia; s__hominis
84030	1	0	0	0	1	k__Bacteria; p__Firmicutes; c__Clostridia; o__Eubacteriales; f__Lachnospiraceae; g__Lacrimispora; s__saccharolytica
433286	1	0	0	0	1	k__Bacteria; p__Firmicutes; c__Clostridia; o__Eubacteriales; f__Lachnospiraceae; g__Anaerocolumna; s__cellulosilytica
29360	1	0	1	0	1	k__Bacteria; p__Firmicutes; c__Clostridia; o__Eubacteriales; f__Lachnospiraceae; g__Cellulosilyticum; s__lentocellum
1677857	2	0	1	0	1	k__Bacteria; p__Firmicutes; c__Clostridia; o__Eubacteriales; f__Oscillospiraceae; g__Acetivibrio; s__saccincola
1736	1	0	0	0	1	k__Bacteria; p__Firmicutes; c__Clostridia; o__Eubacteriales; f__Eubacteriaceae; g__Eubacterium; s__limosum
1981510	1	0	0	0	1	k__Bacteria; p__Firmicutes; c__Clostridia; o__Eubacteriales; f__Clostridiales Family XIII. Incertae Sedis; g__Monoglobus; s__pectinilyticus
2331	1	0	0	0	1	k__Bacteria; p__Firmicutes; c__Clostridia; o__Halanaerobiales; f__Halanaerobiaceae; g__Halanaerobium; s__praevalens
128827	2	0	1	0	1	k__Bacteria; p__Firmicutes; c__Erysipelotrichia; o__Erysipelotrichales; f__Erysipelotrichaceae; g__; s__
1547	2	0	1	0	1	k__Bacteria; p__Firmicutes; c__Erysipelotrichia; o__Erysipelotrichales; f__Erysipelotrichaceae; g__Erysipelatoclostridium; s__ramosum
1260	1	0	1	0	1	k__Bacteria; p__Firmicutes; c__Tissierellia; o__Tissierellales; f__Peptoniphilaceae; g__Finegoldia; s__magna
29466	1	0	1	0	1	k__Bacteria; p__Firmicutes; c__Negativicutes; o__Veillonellales; f__Veillonellaceae; g__Veillonella; s__parvula
1696	2	0	0	0	1	k__Bacteria; p__Actinobacteria; c__Actinomycetia; o__Micrococcales; f__Brevibacteriaceae; g__Brevibacterium; s__
1270	1	0	0	0	1	k__Bacteria; p__Actinobacteria; c__Actinomycetia; o__Micrococcales; f__Micrococcaceae; g__Micrococcus; s__luteus
396015	1	0	0	0	1	k__Bacteria; p__Actinobacteria; c__Actinomycetia; o__Micrococcales; f__Micrococcaceae; g__Rothia; s__terrae
2099583	1	0	2	0	1	k__Bacteria; p__Actinobacteria; c__Actinomycetia; o__Streptomycetales; f__Streptomycetaceae; g__Streptomyces; s__sp. ICC1
38301	1	0	0	0	1	k__Bacteria; p__Actinobacteria; c__Actinomycetia; o__Corynebacteriales; f__Corynebacteriaceae; g__Corynebacterium; s__minutissimum
2120	2	0	0	0	1	k__Bacteria; p__Tenericutes; c__Mollicutes; o__Mycoplasmatales; f__Mycoplasmataceae; g__Mycoplasma; s__neurolyticum
142650	1	0	0	0	1	k__Bacteria; p__Tenericutes; c__Mollicutes; o__Mycoplasmatales; f__Mycoplasmataceae; g__Mycoplasmopsis; s__Mycoplasma phocirhinis
216942	1	0	0	0	1	k__Bacteria; p__Tenericutes; c__Mollicutes; o__Entomoplasmatales; f__Spiroplasmataceae; g__Spiroplasma; s__litorale
2136	1	0	0	0	1	k__Bacteria; p__Tenericutes; c__Mollicutes; o__Entomoplasmatales; f__Spiroplasmataceae; g__Spiroplasma; s__monobiae
550	1	0	1	0	1	k__Bacteria; p__Proteobacteria; c__Gammaproteobacteria; o__Enterobacterales; f__Enterobacteriaceae; g__Enterobacter; s__cloacae
546	3	0	1	0	1	k__Bacteria; p__Proteobacteria; c__Gammaproteobacteria; o__Enterobacterales; f__Enterobacteriaceae; g__Citrobacter; s__freundii
28901	2	0	1	0	1	k__Bacteria; p__Proteobacteria; c__Gammaproteobacteria; o__Enterobacterales; f__Enterobacteriaceae; g__Salmonella; s__enterica
584	2	0	0	0	1	k__Bacteria; p__Proteobacteria; c__Gammaproteobacteria; o__Enterobacterales; f__Morganellaceae; g__Proteus; s__mirabilis
586	1	0	1	0	1	k__Bacteria; p__Proteobacteria; c__Gammaproteobacteria; o__Enterobacterales; f__Morganellaceae; g__Providencia; s__
230089	1	0	1	0	1	k__Bacteria; p__Proteobacteria; c__Gammaproteobacteria; o__Enterobacterales; f__Morganellaceae; g__Photorhabdus; s__thracensis
263819	1	0	0	0	1	k__Bacteria; p__Proteobacteria; c__Gammaproteobacteria; o__Enterobacterales; f__Yersiniaceae; g__Yersinia; s__aleksiciae
122277	1	0	0	0	1	k__Bacteria; p__Proteobacteria; c__Gammaproteobacteria; o__Enterobacterales; f__Pectobacteriaceae; g__Pectobacterium; s__
468	2	0	0	0	1	k__Bacteria; p__Proteobacteria; c__Gammaproteobacteria; o__Pseudomonadales; f__Moraxellaceae; g__; s__
1324350	1	0	1	0	1	k__Bacteria; p__Proteobacteria; c__Gammaproteobacteria; o__Pseudomonadales; f__Moraxellaceae; g__Acinetobacter; s__equi
40216	1	0	2	0	1	k__Bacteria; p__Proteobacteria; c__Gammaproteobacteria; o__Pseudomonadales; f__Moraxellaceae; g__Acinetobacter; s__radioresistens
29430	1	0	1	0	1	k__Bacteria; p__Proteobacteria; c__Gammaproteobacteria; o__Pseudomonadales; f__Moraxellaceae; g__Acinetobacter; s__haemolyticus
334543	1	0	1	0	1	k__Bacteria; p__Proteobacteria; c__Gammaproteobacteria; o__Pseudomonadales; f__Moraxellaceae; g__Psychrobacter; s__arcticus
316	2	0	4	0	1	k__Bacteria; p__Proteobacteria; c__Gammaproteobacteria; o__Pseudomonadales; f__Pseudomonadaceae; g__Pseudomonas; s__stutzeri
62322	1	0	0	0	1	k__Bacteria; p__Proteobacteria; c__Gammaproteobacteria; o__Alteromonadales; f__Shewanellaceae; g__Shewanella; s__baltica
724	2	0	0	0	1	k__Bacteria; p__Proteobacteria; c__Gammaproteobacteria; o__Pasteurellales; f__Pasteurellaceae; g__Haemophilus; s__
730	2	0	0	0	1	k__Bacteria; p__Proteobacteria; c__Gammaproteobacteria; o__Pasteurellales; f__Pasteurellaceae; g__Haemophilus; s__[Haemophilus] ducreyi
738	1	0	0	0	1	k__Bacteria; p__Proteobacteria; c__Gammaproteobacteria; o__Pasteurellales; f__Pasteurellaceae; g__Glaesserella; s__parasuis
262	1	0	0	0	1	k__Bacteria; p__Proteobacteria; c__Gammaproteobacteria; o__Thiotrichales; f__Francisellaceae; g__Francisella; s__
28110	2	0	1	0	1	k__Bacteria; p__Proteobacteria; c__Gammaproteobacteria; o__Thiotrichales; f__Francisellaceae; g__Francisella; s__philomiragia
299583	1	0	1	0	1	k__Bacteria; p__Proteobacteria; c__Gammaproteobacteria; o__Thiotrichales; f__Francisellaceae; g__Francisella; s__orientalis
2714952	1	0	0	0	1	k__Bacteria; p__Proteobacteria; c__Betaproteobacteria; o__Burkholderiales; f__Comamonadaceae; g__Kinneretia; s__sp. DAIF2
535	1	0	1	0	1	k__Bacteria; p__Proteobacteria; c__Betaproteobacteria; o__Neisseriales; f__Chromobacteriaceae; g__Chromobacterium; s__
39960	1	0	0	0	1	k__Bacteria; p__Proteobacteria; c__Alphaproteobacteria; o__Sphingomonadales; f__Erythrobacteraceae; g__Erythrobacter; s__litoralis
2749086	1	0	0	0	1	k__Bacteria; p__Proteobacteria; c__Alphaproteobacteria; o__Maricaulales; f__Maricaulaceae; g__Hyphobacterium; s__sp. CCMP332
28199	1	0	0	0	1	k__Bacteria; p__Proteobacteria; c__Epsilonproteobacteria; o__Campylobacterales; f__Campylobacteraceae; g__Arcobacter; s__nitrofigilis
1080223	1	0	1	0	1	k__Bacteria; p__Proteobacteria; c__Epsilonproteobacteria; o__Campylobacterales; f__Campylobacteraceae; g__Malaciobacter; s__pacificus
195	1	0	0	0	1	k__Bacteria; p__Proteobacteria; c__Epsilonproteobacteria; o__Campylobacterales; f__Campylobacteraceae; g__Campylobacter; s__coli
197	1	0	1	0	1	k__Bacteria; p__Proteobacteria; c__Epsilonproteobacteria; o__Campylobacterales; f__Campylobacteraceae; g__Campylobacter; s__jejuni
2672570	2	0	1	0	1	k__Bacteria; p__Proteobacteria; c__Epsilonproteobacteria; o__Campylobacterales; f__Thiovulaceae; g__Sulfurimonas; s__sp. H1576
459526	2	0	0	0	1	k__Bacteria; p__Bacteroidetes; c__Flavobacteriia; o__Flavobacteriales; f__Flavobacteriaceae; g__Flavobacterium; s__anhuiense
2201181	1	0	0	0	1	k__Bacteria; p__Bacteroidetes; c__Flavobacteriia; o__Flavobacteriales; f__Flavobacteriaceae; g__Flavobacterium; s__sediminis
1888915	1	0	2	0	1	k__Bacteria; p__Bacteroidetes; c__Flavobacteriia; o__Flavobacteriales; f__Flavobacteriaceae; g__Polaribacter; s__haliotis
584609	2	0	3	0	1	k__Bacteria; p__Bacteroidetes; c__Flavobacteriia; o__Flavobacteriales; f__Flavobacteriaceae; g__Tenacibaculum; s__jejuense
754423	2	0	1	0	1	k__Bacteria; p__Bacteroidetes; c__Flavobacteriia; o__Flavobacteriales; f__Flavobacteriaceae; g__Tenacibaculum; s__sp. SZ-18
2736252	1	0	0	0	1	k__Bacteria; p__Bacteroidetes; c__Flavobacteriia; o__Flavobacteriales; f__Flavobacteriaceae; g__Aquimarina; s__sp. TRL1
2594004	2	0	0	0	1	k__Bacteria; p__Bacteroidetes; c__Flavobacteriia; o__Flavobacteriales; f__Flavobacteriaceae; g__Formosa; s__sediminum
1218801	1	0	0	0	1	k__Bacteria; p__Bacteroidetes; c__Flavobacteriia; o__Flavobacteriales; f__Flavobacteriaceae; g__Kordia; s__antarctica
2762318	1	0	1	0	1	k__Bacteria; p__Bacteroidetes; c__Flavobacteriia; o__Flavobacteriales; f__Weeksellaceae; g__; s__
2015076	1	0	0	0	1	k__Bacteria; p__Bacteroidetes; c__Flavobacteriia; o__Flavobacteriales; f__Weeksellaceae; g__Chryseobacterium; s__sp. T16E-39
2713414	1	0	2	0	1	k__Bacteria; p__Bacteroidetes; c__Flavobacteriia; o__Flavobacteriales; f__Weeksellaceae; g__Chryseobacterium; s__sp. POL2
2694930	2	0	0	0	1	k__Bacteria; p__Bacteroidetes; c__Cytophagia; o__Cytophagales; f__Hymenobacteraceae; g__Pontibacter; s__pudoricolor
818	1	0	0	0	1	k__Bacteria; p__Bacteroidetes; c__Bacteroidia; o__Bacteroidales; f__Bacteroidaceae; g__Bacteroides; s__thetaiotaomicron
28453	1	0	2	0	1	k__Bacteria; p__Bacteroidetes; c__Sphingobacteriia; o__Sphingobacteriales; f__Sphingobacteriaceae; g__Sphingobacterium; s__
79329	1	0	0	0	1	k__Bacteria; p__Bacteroidetes; c__Chitinophagia; o__Chitinophagales; f__Chitinophagaceae; g__Chitinophaga; s__pinensis
496057	2	0	0	0	1	k__Bacteria; p__Bacteroidetes; c__Chitinophagia; o__Chitinophagales; f__Chitinophagaceae; g__Arachidicoccus; s__ginsenosidivorans
850	1	0	18	0	1	k__Bacteria; p__Fusobacteria; c__Fusobacteriia; o__Fusobacteriales; f__Fusobacteriaceae; g__Fusobacterium; s__mortiferum
140	1	0	0	0	1	k__Bacteria; p__Spirochaetes; c__Spirochaetia; o__Spirochaetales; f__Borreliaceae; g__Borrelia; s__hermsii
158	1	0	0	0	1	k__Bacteria; p__Spirochaetes; c__Spirochaetia; o__Spirochaetales; f__Spirochaetaceae; g__Treponema; s__denticola
252967	1	0	3	0	1	k__Bacteria; p__Spirochaetes; c__Spirochaetia; o__Spirochaetales; f__Spirochaetaceae; g__Thiospirochaeta; s__perfilievii
29521	1	0	1	0	1	k__Bacteria; p__Spirochaetes; c__Spirochaetia; o__Brachyspirales; f__Brachyspiraceae; g__Brachyspira; s__
1287055	2	0	0	0	1	k__Bacteria; p__Spirochaetes; c__Spirochaetia; o__Brachyspirales; f__Brachyspiraceae; g__Brachyspira; s__hampsonii
52584	1	0	0	0	1	k__Bacteria; p__Spirochaetes; c__Spirochaetia; o__Brachyspirales; f__Brachyspiraceae; g__Brachyspira; s__pilosicoli
84378	1	0	1	0	1	k__Bacteria; p__Spirochaetes; c__Spirochaetia; o__Brachyspirales; f__Brachyspiraceae; g__Brachyspira; s__murdochii
155863	1	0	1	0	1	k__Archaea; p__Euryarchaeota; c__Methanococci; o__Methanococcales; f__Methanococcaceae; g__Methanothermococcus; s__okinawensis
43080	1	0	1	0	1	k__Archaea; p__Crenarchaeota; c__Thermoprotei; o__Sulfolobales; f__Sulfolobaceae; g__Sulfolobus; s__islandicus
1580092	1	0	0	0	1	k__Archaea; p__Thaumarchaeota; c__Nitrososphaeria; o__Nitrosopumilales; f__Nitrosopumilaceae; g__Nitrosopumilus; s__adriaticus
1084719	1	0	0	0	1	k__Viruses; p__Uroviricota; c__Caudoviricetes; o__Caudovirales; f__Myoviridae; g__Tequatrovirus; s__Bacillus virus G
561	0	0	1	0	1	k__Bacteria; p__Proteobacteria; c__Gammaproteobacteria; o__Enterobacterales; f__Enterobacteriaceae; g__Escherichia; s__
548	0	0	1	0	1	k__Bacteria; p__Proteobacteria; c__Gammaproteobacteria; o__Enterobacterales; f__Enterobacteriaceae; g__Klebsiella; s__aerogenes
51229	0	0	1	0	1	k__Bacteria; p__Proteobacteria; c__Gammaproteobacteria; o__Enterobacterales; f__Erwiniaceae; g__Wigglesworthia; s__glossinidia
28152	0	0	1	0	1	k__Bacteria; p__Proteobacteria; c__Gammaproteobacteria; o__Enterobacterales; f__Yersiniaceae; g__Yersinia; s__kristensenii
138074	0	0	1	0	1	k__Bacteria; p__Proteobacteria; c__Gammaproteobacteria; o__Enterobacterales; f__Yersiniaceae; g__Serratia; s__symbiotica
554	0	0	2	0	1	k__Bacteria; p__Proteobacteria; c__Gammaproteobacteria; o__Enterobacterales; f__Pectobacteriaceae; g__Pectobacterium; s__carotovorum
202950	0	0	1	0	1	k__Bacteria; p__Proteobacteria; c__Gammaproteobacteria; o__Pseudomonadales; f__Moraxellaceae; g__Acinetobacter; s__baylyi
662	0	0	1	0	1	k__Bacteria; p__Proteobacteria; c__Gammaproteobacteria; o__Vibrionales; f__Vibrionaceae; g__Vibrio; s__
1381081	0	0	1	0	1	k__Bacteria; p__Proteobacteria; c__Gammaproteobacteria; o__Vibrionales; f__Vibrionaceae; g__Vibrio; s__panuliri
2547970	0	0	2	0	1	k__Bacteria; p__Proteobacteria; c__Gammaproteobacteria; o__Alteromonadales; f__Shewanellaceae; g__Parashewanella; s__tropica
28196	0	0	1	0	1	k__Bacteria; p__Proteobacteria; c__Epsilonproteobacteria; o__Campylobacterales; f__Campylobacteraceae; g__Arcobacter; s__
45655	0	0	2	0	1	k__Bacteria; p__Proteobacteria; c__Deltaproteobacteria; o__Desulfobacterales; f__Desulfobacteraceae; g__Desulfonema; s__magnum
38323	0	0	1	0	1	k__Bacteria; p__Proteobacteria; c__Alphaproteobacteria; o__Hyphomicrobiales; f__Bartonellaceae; g__Bartonella; s__henselae
32002	0	0	1	0	1	k__Bacteria; p__Proteobacteria; c__Betaproteobacteria; o__Burkholderiales; f__Alcaligenaceae; g__Achromobacter; s__denitrificans
64104	0	0	4	0	1	k__Bacteria; p__Firmicutes; c__Bacilli; o__Bacillales; f__Bacillaceae; g__Bacillus; s__pseudomycoides
2026191	0	0	1	0	1	k__Bacteria; p__Firmicutes; c__Bacilli; o__Bacillales; f__Bacillaceae; g__Bacillus; s__luti
1423	0	0	1	0	1	k__Bacteria; p__Firmicutes; c__Bacilli; o__Bacillales; f__Bacillaceae; g__Bacillus; s__subtilis
2099786	0	0	1	0	1	k__Bacteria; p__Firmicutes; c__Bacilli; o__Bacillales; f__Bacillaceae; g__Salicibibacter; s__kimchii
28035	0	0	1	0	1	k__Bacteria; p__Firmicutes; c__Bacilli; o__Bacillales; f__Staphylococcaceae; g__Staphylococcus; s__lugdunensis
1898474	0	0	1	0	1	k__Bacteria; p__Firmicutes; c__Bacilli; o__Bacillales; f__Staphylococcaceae; g__Macrococcus; s__sp. IME1552
1245	0	0	1	0	1	k__Bacteria; p__Firmicutes; c__Bacilli; o__Lactobacillales; f__Lactobacillaceae; g__Leuconostoc; s__mesenteroides
1308	0	0	3	0	1	k__Bacteria; p__Firmicutes; c__Bacilli; o__Lactobacillales; f__Streptococcaceae; g__Streptococcus; s__thermophilus
82348	0	0	1	0	1	k__Bacteria; p__Firmicutes; c__Bacilli; o__Lactobacillales; f__Streptococcaceae; g__Streptococcus; s__pluranimalium
1805431	0	0	1	0	1	k__Bacteria; p__Firmicutes; c__Bacilli; o__Lactobacillales; f__Enterococcaceae; g__Enterococcus; s__saigonensis
2483110	0	0	1	0	1	k__Bacteria; p__Firmicutes; c__Clostridia; o__Eubacteriales; f__Clostridiaceae; g__Clostridium; s__sp. JN-1
36845	0	0	5	0	1	k__Bacteria; p__Firmicutes; c__Clostridia; o__Eubacteriales; f__Clostridiaceae; g__Clostridium; s__intestinale
84022	0	0	2	0	1	k__Bacteria; p__Firmicutes; c__Clostridia; o__Eubacteriales; f__Clostridiaceae; g__Clostridium; s__aceticum
2068654	0	0	1	0	1	k__Bacteria; p__Firmicutes; c__Clostridia; o__Eubacteriales; f__Clostridiaceae; g__Clostridium; s__fermenticellae
1424294	0	0	3	0	1	k__Bacteria; p__Firmicutes; c__Clostridia; o__Eubacteriales; f__Clostridiaceae; g__Geosporobacter; s__ferrireducens
208479	0	0	1	0	1	k__Bacteria; p__Firmicutes; c__Clostridia; o__Eubacteriales; f__Lachnospiraceae; g__Enterocloster; s__bolteae
288965	0	0	1	0	1	k__Bacteria; p__Firmicutes; c__Clostridia; o__Eubacteriales; f__Oscillospiraceae; g__Acetivibrio; s__clariflavus
2697030	0	0	1	0	1	k__Bacteria; p__Firmicutes; c__Clostridia; o__Eubacteriales; f__Clostridiales Family XIII. Incertae Sedis; g__Aminipila; s__sp. CBA3637
225084	0	0	1	0	1	k__Bacteria; p__Firmicutes; c__Erysipelotrichia; o__Erysipelotrichales; f__Erysipelotrichaceae; g__Erysipelothrix; s__inopinata
33033	0	0	2	0	1	k__Bacteria; p__Firmicutes; c__Tissierellia; o__Tissierellales; f__Peptoniphilaceae; g__Parvimonas; s__micra
437897	0	0	2	0	1	k__Bacteria; p__Firmicutes; c__Negativicutes; o__Selenomonadales; f__Selenomonadaceae; g__Megamonas; s__funiformis
29553	0	0	1	0	1	k__Bacteria; p__Tenericutes; c__Mollicutes; o__Mycoplasmatales; f__Mycoplasmataceae; g__Mycoplasmopsis; s__Mycoplasma bovirhinis
272131	0	0	1	0	1	k__Bacteria; p__Cyanobacteria; c__; o__Nostocales; f__Nostocaceae; g__Nostoc; s__punctiforme
156213	0	0	1	0	1	k__Bacteria; p__Cyanobacteria; c__; o__Nostocales; f__Aphanizomenonaceae; g__Anabaenopsis; s__elenkinii
1807358	0	0	1	0	1	k__Bacteria; p__Cyanobacteria; c__; o__Pleurocapsales; f__Dermocarpellaceae; g__Stanieria; s__sp. NIES-3757
2099584	0	0	1	0	1	k__Bacteria; p__Actinobacteria; c__Actinomycetia; o__Streptomycetales; f__Streptomycetaceae; g__Streptomyces; s__sp. ICC4
1306519	0	0	2	0	1	k__Bacteria; p__Bacteroidetes; c__Flavobacteriia; o__Flavobacteriales; f__Flavobacteriaceae; g__Flavobacterium; s__commune
1336804	0	0	1	0	1	k__Bacteria; p__Bacteroidetes; c__Flavobacteriia; o__Flavobacteriales; f__Flavobacteriaceae; g__Polaribacter; s__sp. Hel1_33_78
1896175	0	0	1	0	1	k__Bacteria; p__Bacteroidetes; c__Flavobacteriia; o__Flavobacteriales; f__Flavobacteriaceae; g__Polaribacter; s__sp. KT 15
2738844	0	0	1	0	1	k__Bacteria; p__Bacteroidetes; c__Flavobacteriia; o__Flavobacteriales; f__Flavobacteriaceae; g__Polaribacter; s__sp. L12M9
1486034	0	0	1	0	1	k__Bacteria; p__Bacteroidetes; c__Flavobacteriia; o__Flavobacteriales; f__Flavobacteriaceae; g__Lacinutrix; s__venerupis
343403	0	0	1	0	1	k__Bacteria; p__Bacteroidetes; c__Flavobacteriia; o__Flavobacteriales; f__Flavobacteriaceae; g__Costertonia; s__aggregata
101385	0	0	1	0	1	k__Bacteria; p__Bacteroidetes; c__Flavobacteriia; o__Flavobacteriales; f__Flavobacteriaceae; g__Aequorivita; s__sublithincola
2282170	0	0	1	0	1	k__Bacteria; p__Bacteroidetes; c__Flavobacteriia; o__Flavobacteriales; f__Flavobacteriaceae; g__Kordia; s__sp. SMS9
878220	0	0	1	0	1	k__Bacteria; p__Bacteroidetes; c__Flavobacteriia; o__Flavobacteriales; f__Weeksellaceae; g__Chryseobacterium; s__sp. StRB126
2478663	0	0	1	0	1	k__Bacteria; p__Bacteroidetes; c__Flavobacteriia; o__Flavobacteriales; f__Weeksellaceae; g__Chryseobacterium; s__sp. 3008163
2487064	0	0	1	0	1	k__Bacteria; p__Bacteroidetes; c__Flavobacteriia; o__Flavobacteriales; f__Weeksellaceae; g__Chryseobacterium; s__sp. G0186
28131	0	0	1	0	1	k__Bacteria; p__Bacteroidetes; c__Bacteroidia; o__Bacteroidales; f__Prevotellaceae; g__Prevotella; s__intermedia
165179	0	0	1	0	1	k__Bacteria; p__Bacteroidetes; c__Bacteroidia; o__Bacteroidales; f__Prevotellaceae; g__Prevotella; s__copri
861	0	0	8	0	1	k__Bacteria; p__Fusobacteria; c__Fusobacteriia; o__Fusobacteriales; f__Fusobacteriaceae; g__Fusobacterium; s__ulcerans
1137606	0	0	1	0	1	k__Bacteria; p__Spirochaetes; c__Spirochaetia; o__Leptospirales; f__Leptospiraceae; g__Leptospira; s__mayottensis
2108365	0	0	1	0	1	k__Bacteria; p__Thermotogae; c__Thermotogae; o__Petrotogales; f__Petrotogaceae; g__Tepiditoga; s__spiralis
981385	0	0	1	0	1	k__Bacteria; p__Acidobacteria; c__Holophagae; o__Thermotomaculales; f__Thermotomaculaceae; g__Thermotomaculum; s__hydrothermale
294671	0	0	1	0	1	k__Archaea; p__Euryarchaeota; c__Methanobacteria; o__Methanobacteriales; f__Methanobacteriaceae; g__Methanobrevibacter; s__olleyae
2209	0	0	1	0	1	k__Archaea; p__Euryarchaeota; c__Methanomicrobia; o__Methanosarcinales; f__Methanosarcinaceae; g__Methanosarcina; s__mazei
2322	0	0	2	0	1	k__Archaea; p__Euryarchaeota; c__Methanomicrobia; o__Methanosarcinales; f__Methanosarcinaceae; g__Methanohalobium; s__evestigatum
10663	0	0	1	0	1	k__Viruses; p__Uroviricota; c__Caudoviricetes; o__Caudovirales; f__Myoviridae; g__Tequatrovirus; s__
58839	0	0	0	0	1	k__Eukaryota; p__Microsporidia; c__; o__; f__Unikaryonidae; g__Encephalitozoon; s__intestinalis
5661	0	0	0	0	1	k__Eukaryota; p__Euglenozoa; c__Kinetoplastea; o__Trypanosomatida; f__Trypanosomatidae; g__Leishmania; s__donovani
5664	0	0	0	0	1	k__Eukaryota; p__Euglenozoa; c__Kinetoplastea; o__Trypanosomatida; f__Trypanosomatidae; g__Leishmania; s__major
2898	0	0	0	0	1	k__Eukaryota; p__Euglenozoa; c__Cryptophyceae; o__Cryptomonadales; f__Cryptomonadaceae; g__Cryptomonas; s__paramecium
1392	0	0	0	0	1	k__Bacteria; p__Firmicutes; c__Bacilli; o__Bacillales; f__Bacillaceae; g__Bacillus; s__anthracis
2011012	0	0	0	0	1	k__Bacteria; p__Firmicutes; c__Bacilli; o__Bacillales; f__Bacillaceae; g__Bacillus; s__sp. FJAT-45348
2728853	0	0	0	0	1	k__Bacteria; p__Firmicutes; c__Bacilli; o__Bacillales; f__Bacillaceae; g__Bacillus; s__sp. CS13
985762	0	0	0	0	1	k__Bacteria; p__Firmicutes; c__Bacilli; o__Bacillales; f__Staphylococcaceae; g__Staphylococcus; s__agnetis
1406	0	0	0	0	1	k__Bacteria; p__Firmicutes; c__Bacilli; o__Bacillales; f__Paenibacillaceae; g__Paenibacillus; s__polymyxa
2796470	0	0	0	0	1	k__Bacteria; p__Firmicutes; c__Bacilli; o__Bacillales; f__Paenibacillaceae; g__Brevibacillus; s__sp. FJAT-54423
51173	0	0	0	0	1	k__Bacteria; p__Firmicutes; c__Bacilli; o__Bacillales; f__Planococcaceae; g__Ureibacillus; s__thermosphaericus
241244	0	0	0	0	1	k__Bacteria; p__Firmicutes; c__Bacilli; o__Bacillales; f__Planococcaceae; g__Rummeliibacillus; s__stabekisii
1605	0	0	0	0	1	k__Bacteria; p__Firmicutes; c__Bacilli; o__Lactobacillales; f__Lactobacillaceae; g__Ligilactobacillus; s__animalis
1622	0	0	0	0	1	k__Bacteria; p__Firmicutes; c__Bacilli; o__Lactobacillales; f__Lactobacillaceae; g__Ligilactobacillus; s__murinus
33959	0	0	0	0	1	k__Bacteria; p__Firmicutes; c__Bacilli; o__Lactobacillales; f__Lactobacillaceae; g__Lactobacillus; s__johnsonii
293371	0	0	0	0	1	k__Bacteria; p__Firmicutes; c__Bacilli; o__Lactobacillales; f__Lactobacillaceae; g__Paucilactobacillus; s__oligofermentans
1193095	0	0	0	0	1	k__Bacteria; p__Firmicutes; c__Bacilli; o__Lactobacillales; f__Lactobacillaceae; g__Paucilactobacillus; s__hokkaidonensis
392416	0	0	0	0	1	k__Bacteria; p__Firmicutes; c__Bacilli; o__Lactobacillales; f__Lactobacillaceae; g__Companilactobacillus; s__crustorum
152331	0	0	0	0	1	k__Bacteria; p__Firmicutes; c__Bacilli; o__Lactobacillales; f__Lactobacillaceae; g__Lentilactobacillus; s__parabuchneri
176292	0	0	0	0	1	k__Bacteria; p__Firmicutes; c__Bacilli; o__Lactobacillales; f__Lactobacillaceae; g__Secundilactobacillus; s__malefermentans
1599	0	0	0	0	1	k__Bacteria; p__Firmicutes; c__Bacilli; o__Lactobacillales; f__Lactobacillaceae; g__Latilactobacillus; s__sakei
2714949	0	0	0	0	1	k__Bacteria; p__Firmicutes; c__Bacilli; o__Lactobacillales; f__Lactobacillaceae; g__Weissella; s__sp. HDW19
1940319	0	0	0	0	1	k__Bacteria; p__Firmicutes; c__Bacilli; o__Lactobacillales; f__Streptococcaceae; g__Streptococcus; s__sp. DAT741
1341	0	0	0	0	1	k__Bacteria; p__Firmicutes; c__Bacilli; o__Lactobacillales; f__Streptococcaceae; g__Streptococcus; s__ratti
51669	0	0	0	0	1	k__Bacteria; p__Firmicutes; c__Bacilli; o__Lactobacillales; f__Enterococcaceae; g__Tetragenococcus; s__halophilus
1538	0	0	0	0	1	k__Bacteria; p__Firmicutes; c__Clostridia; o__Eubacteriales; f__Clostridiaceae; g__Clostridium; s__ljungdahlii
1548	0	0	0	0	1	k__Bacteria; p__Firmicutes; c__Clostridia; o__Eubacteriales; f__Clostridiaceae; g__Clostridium; s__scatologenes
1501226	0	0	0	0	1	k__Bacteria; p__Firmicutes; c__Clostridia; o__Eubacteriales; f__Peptostreptococcaceae; g__Romboutsia; s__
617123	0	0	0	0	1	k__Bacteria; p__Firmicutes; c__Clostridia; o__Eubacteriales; f__Lachnospiraceae; g__Lachnoanaerobaculum; s__umeaense
301301	0	0	0	0	1	k__Bacteria; p__Firmicutes; c__Clostridia; o__Eubacteriales; f__Lachnospiraceae; g__Roseburia; s__hominis
1515	0	0	0	0	1	k__Bacteria; p__Firmicutes; c__Clostridia; o__Eubacteriales; f__Oscillospiraceae; g__Acetivibrio; s__thermocellus
33952	0	0	0	0	1	k__Bacteria; p__Firmicutes; c__Clostridia; o__Eubacteriales; f__Eubacteriaceae; g__Acetobacterium; s__woodii
79209	0	0	0	0	1	k__Bacteria; p__Firmicutes; c__Clostridia; o__Eubacteriales; f__Peptococcaceae; g__Desulfosporosinus; s__meridiei
31899	0	0	0	0	1	k__Bacteria; p__Firmicutes; c__Clostridia; o__Thermoanaerobacterales; f__Thermoanaerobacterales Family III. Incertae Sedis; g__Caldicellulosiruptor; s__bescii
2714929	0	0	0	0	1	k__Bacteria; p__Firmicutes; c__Erysipelotrichia; o__Erysipelotrichales; f__Erysipelotrichaceae; g__Erysipelothrix; s__sp. HDW6B
1982626	0	0	0	0	1	k__Bacteria; p__Firmicutes; c__Erysipelotrichia; o__Erysipelotrichales; f__Erysipelotrichaceae; g__Faecalibacillus; s__intestinalis
54005	0	0	0	0	1	k__Bacteria; p__Firmicutes; c__Tissierellia; o__Tissierellales; f__Peptoniphilaceae; g__Peptoniphilus; s__harei
158847	0	0	0	0	1	k__Bacteria; p__Firmicutes; c__Negativicutes; o__Selenomonadales; f__Selenomonadaceae; g__Megamonas; s__hypermegale
243899	0	0	0	0	1	k__Bacteria; p__Firmicutes; c__Negativicutes; o__Veillonellales; f__Veillonellaceae; g__Veillonella; s__endosymbiont 'TC1' of Trimyema compressum
1748	0	0	0	0	1	k__Bacteria; p__Actinobacteria; c__Actinomycetia; o__Propionibacteriales; f__Propionibacteriaceae; g__Acidipropionibacterium; s__acidipropionici
2819349	0	0	0	0	1	k__Bacteria; p__Actinobacteria; c__Actinomycetia; o__Propionibacteriales; f__Propionibacteriaceae; g__Brevilactibacter; s__sp. MC1595
1839	0	0	0	0	1	k__Bacteria; p__Actinobacteria; c__Actinomycetia; o__Propionibacteriales; f__Nocardioidaceae; g__Nocardioides; s__
1269	0	0	0	0	1	k__Bacteria; p__Actinobacteria; c__Actinomycetia; o__Micrococcales; f__Micrococcaceae; g__Micrococcus; s__
2770551	0	0	0	0	1	k__Bacteria; p__Actinobacteria; c__Actinomycetia; o__Micrococcales; f__Dermacoccaceae; g__Yimella; s__sp. cx-51
1658671	0	0	0	0	1	k__Bacteria; p__Actinobacteria; c__Actinomycetia; o__Micrococcales; f__Intrasporangiaceae; g__Arsenicicoccus; s__sp. oral taxon 190
85007	0	0	0	0	1	k__Bacteria; p__Actinobacteria; c__Actinomycetia; o__Corynebacteriales; f__; g__; s__
401472	0	0	0	0	1	k__Bacteria; p__Actinobacteria; c__Actinomycetia; o__Corynebacteriales; f__Corynebacteriaceae; g__Corynebacterium; s__ureicelerivorans
2062	0	0	0	0	1	k__Bacteria; p__Actinobacteria; c__Actinomycetia; o__Streptomycetales; f__Streptomycetaceae; g__; s__
2742133	0	0	0	0	1	k__Bacteria; p__Actinobacteria; c__Actinomycetia; o__Streptomycetales; f__Streptomycetaceae; g__Streptomyces; s__sp. NA02536
349971	0	0	0	0	1	k__Bacteria; p__Actinobacteria; c__Actinomycetia; o__Streptomycetales; f__Streptomycetaceae; g__Streptomyces; s__sp. FR1
2742131	0	0	0	0	1	k__Bacteria; p__Actinobacteria; c__Actinomycetia; o__Pseudonocardiales; f__Pseudonocardiaceae; g__Amycolatopsis; s__sp. Hca4
2591108	0	0	0	0	1	k__Bacteria; p__Actinobacteria; c__Actinomycetia; o__Streptosporangiales; f__Thermomonosporaceae; g__Actinomadura; s__sp. WMMA1423
2722820	0	0	0	0	1	k__Bacteria; p__Actinobacteria; c__Actinomycetia; o__Actinomycetales; f__Actinomycetaceae; g__Actinomyces; s__sp. ZJ34
2576902	0	0	0	0	1	k__Bacteria; p__Cyanobacteria; c__; o__Nostocales; f__Nostocaceae; g__Nostoc; s__sp. C052
54304	0	0	0	0	1	k__Bacteria; p__Cyanobacteria; c__; o__Oscillatoriales; f__Microcoleaceae; g__Planktothrix; s__
1501268	0	0	0	0	1	k__Bacteria; p__Cyanobacteria; c__; o__Synechococcales; f__Prochloraceae; g__Prochlorococcus; s__sp. MIT 0604
1763363	0	0	0	0	1	k__Bacteria; p__Cyanobacteria; c__; o__Pleurocapsales; f__Dermocarpellaceae; g__Stanieria; s__cyanobacterium endosymbiont of Rhopalodia gibberula
2767358	0	0	0	0	1	k__Bacteria; p__Tenericutes; c__Mollicutes; o__Mycoplasmatales; f__Mycoplasmataceae; g__Mycoplasmopsis; s__
2109	0	0	0	0	1	k__Bacteria; p__Tenericutes; c__Mollicutes; o__Mycoplasmatales; f__Mycoplasmataceae; g__Mycoplasmopsis; s__Mycoplasma synoviae
171281	0	0	0	0	1	k__Bacteria; p__Tenericutes; c__Mollicutes; o__Mycoplasmatales; f__Mycoplasmataceae; g__Mycoplasmopsis; s__Mycoplasma citelli
754514	0	0	0	0	1	k__Bacteria; p__Tenericutes; c__Mollicutes; o__Mycoplasmatales; f__Mycoplasmataceae; g__Mycoplasma; s__sp. Mirounga ES2805-ORL
538220	0	0	0	0	1	k__Bacteria; p__Tenericutes; c__Mollicutes; o__Mycoplasmatales; f__Mycoplasmataceae; g__Mycoplasma; s__struthionis
216937	0	0	0	0	1	k__Bacteria; p__Tenericutes; c__Mollicutes; o__Entomoplasmatales; f__Spiroplasmataceae; g__Spiroplasma; s__floricola
310783	0	0	0	0	1	k__Bacteria; p__Deinococcus-Thermus; c__Deinococci; o__Deinococcales; f__Deinococcaceae; g__Deinococcus; s__deserti
980427	0	0	0	0	1	k__Bacteria; p__Deinococcus-Thermus; c__Deinococci; o__Deinococcales; f__Deinococcaceae; g__Deinococcus; s__wulumuqiensis
1806508	0	0	0	0	1	k__Bacteria; p__Chloroflexi; c__Ardenticatenia; o__Ardenticatenales; f__Ardenticatenaceae; g__Candidatus Promineofilum; s__breve
2675773	0	0	0	0	1	k__Bacteria; p__Proteobacteria; c__Gammaproteobacteria; o__Enterobacterales; f__Enterobacteriaceae; g__; s__Enterobacteriaceae endosymbiont of Donacia cincticornis
2675796	0	0	0	0	1	k__Bacteria; p__Proteobacteria; c__Gammaproteobacteria; o__Enterobacterales; f__Enterobacteriaceae; g__; s__Enterobacteriaceae endosymbiont of Plateumaris rustica
2675794	0	0	0	0	1	k__Bacteria; p__Proteobacteria; c__Gammaproteobacteria; o__Enterobacterales; f__Enterobacteriaceae; g__; s__Enterobacteriaceae endosymbiont of Plateumaris consimilis
1505597	0	0	0	0	1	k__Bacteria; p__Proteobacteria; c__Gammaproteobacteria; o__Enterobacterales; f__Enterobacteriaceae; g__Candidatus Blochmannia; s__Blochmannia endosymbiont of Camponotus (Colobopsis) obliquus
1070130	0	0	0	0	1	k__Bacteria; p__Proteobacteria; c__Gammaproteobacteria; o__Enterobacterales; f__Enterobacteriaceae; g__Candidatus Gullanella; s__endobia
235559	0	0	0	0	1	k__Bacteria; p__Proteobacteria; c__Gammaproteobacteria; o__Enterobacterales; f__Morganellaceae; g__Arsenophonus; s__endosymbiont of Aleurodicus dispersus
41202	0	0	0	0	1	k__Bacteria; p__Proteobacteria; c__Gammaproteobacteria; o__Enterobacterales; f__Yersiniaceae; g__Ewingella; s__americana
1905730	0	0	0	0	1	k__Bacteria; p__Proteobacteria; c__Gammaproteobacteria; o__Enterobacterales; f__Pectobacteriaceae; g__Pectobacterium; s__parmentieri
82983	0	0	0	0	1	k__Bacteria; p__Proteobacteria; c__Gammaproteobacteria; o__Enterobacterales; f__Hafniaceae; g__Obesumbacterium; s__proteus
1407071	0	0	0	0	1	k__Bacteria; p__Proteobacteria; c__Gammaproteobacteria; o__Pseudomonadales; f__Moraxellaceae; g__Acinetobacter; s__sp. TGL-Y2
1827285	0	0	0	0	1	k__Bacteria; p__Proteobacteria; c__Gammaproteobacteria; o__Pseudomonadales; f__Moraxellaceae; g__Acinetobacter; s__sp. MYb10
2715163	0	0	0	0	1	k__Bacteria; p__Proteobacteria; c__Gammaproteobacteria; o__Pseudomonadales; f__Moraxellaceae; g__Acinetobacter; s__lanii
475	0	0	0	0	1	k__Bacteria; p__Proteobacteria; c__Gammaproteobacteria; o__Pseudomonadales; f__Moraxellaceae; g__Moraxella; s__
476	0	0	0	0	1	k__Bacteria; p__Proteobacteria; c__Gammaproteobacteria; o__Pseudomonadales; f__Moraxellaceae; g__Moraxella; s__bovis
2733866	0	0	0	0	1	k__Bacteria; p__Proteobacteria; c__Gammaproteobacteria; o__Pseudomonadales; f__Moraxellaceae; g__Psychrobacter; s__sp. KCTC 72983
2283318	0	0	0	0	1	k__Bacteria; p__Proteobacteria; c__Gammaproteobacteria; o__Pseudomonadales; f__Moraxellaceae; g__Aquirhabdus; s__parva
2320270	0	0	0	0	1	k__Bacteria; p__Proteobacteria; c__Gammaproteobacteria; o__Pseudomonadales; f__Pseudomonadaceae; g__Pseudomonas; s__sp. DG56-2
198620	0	0	0	0	1	k__Bacteria; p__Proteobacteria; c__Gammaproteobacteria; o__Pseudomonadales; f__Pseudomonadaceae; g__Pseudomonas; s__koreensis
735	0	0	0	0	1	k__Bacteria; p__Proteobacteria; c__Gammaproteobacteria; o__Pasteurellales; f__Pasteurellaceae; g__Haemophilus; s__parahaemolyticus
1906744	0	0	0	0	1	k__Bacteria; p__Proteobacteria; c__Gammaproteobacteria; o__Pasteurellales; f__Pasteurellaceae; g__Rodentibacter; s__heylii
739	0	0	0	0	1	k__Bacteria; p__Proteobacteria; c__Gammaproteobacteria; o__Pasteurellales; f__Pasteurellaceae; g__Aggregatibacter; s__segnis
2059264	0	0	0	0	1	k__Bacteria; p__Proteobacteria; c__Gammaproteobacteria; o__Alteromonadales; f__Shewanellaceae; g__Shewanella; s__sp. Pdp11
60961	0	0	0	0	1	k__Bacteria; p__Proteobacteria; c__Gammaproteobacteria; o__Alteromonadales; f__Shewanellaceae; g__Shewanella; s__woodyi
233316	0	0	0	0	1	k__Bacteria; p__Proteobacteria; c__Gammaproteobacteria; o__Alteromonadales; f__Alteromonadaceae; g__Alteromonas; s__stellipolaris
28228	0	0	0	0	1	k__Bacteria; p__Proteobacteria; c__Gammaproteobacteria; o__Alteromonadales; f__Colwelliaceae; g__Colwellia; s__
1542390	0	0	0	0	1	k__Bacteria; p__Proteobacteria; c__Gammaproteobacteria; o__Thiotrichales; f__Francisellaceae; g__Francisella; s__frigiditurris
645	0	0	0	0	1	k__Bacteria; p__Proteobacteria; c__Gammaproteobacteria; o__Aeromonadales; f__Aeromonadaceae; g__Aeromonas; s__salmonicida
83771	0	0	0	0	1	k__Bacteria; p__Proteobacteria; c__Gammaproteobacteria; o__Aeromonadales; f__Succinivibrionaceae; g__Succinivibrio; s__dextrinosolvens
346	0	0	0	0	1	k__Bacteria; p__Proteobacteria; c__Gammaproteobacteria; o__Xanthomonadales; f__Xanthomonadaceae; g__Xanthomonas; s__citri
45056	0	0	0	0	1	k__Bacteria; p__Proteobacteria; c__Gammaproteobacteria; o__Legionellales; f__Legionellaceae; g__Legionella; s__adelaidensis
2497861	0	0	0	0	1	k__Bacteria; p__Proteobacteria; c__Gammaproteobacteria; o__Oceanospirillales; f__Halomonadaceae; g__Halomonas; s__sp. BC-M4-5
1897729	0	0	0	0	1	k__Bacteria; p__Proteobacteria; c__Gammaproteobacteria; o__Oceanospirillales; f__Halomonadaceae; g__Halomonas; s__aestuarii
2291597	0	0	0	0	1	k__Bacteria; p__Proteobacteria; c__Gammaproteobacteria; o__Oceanospirillales; f__Halomonadaceae; g__Gallaecimonas; s__mangrovi
1842539	0	0	0	0	1	k__Bacteria; p__Proteobacteria; c__Alphaproteobacteria; o__Hyphomicrobiales; f__Bradyrhizobiaceae; g__Bosea; s__sp. RAC05
82115	0	0	0	0	1	k__Bacteria; p__Proteobacteria; c__Alphaproteobacteria; o__Hyphomicrobiales; f__Rhizobiaceae; g__; s__
2291939	0	0	0	0	1	k__Bacteria; p__Proteobacteria; c__Alphaproteobacteria; o__Hyphomicrobiales; f__Rhizobiaceae; g__Rhizobium; s__sp. ZX09
373	0	0	0	0	1	k__Bacteria; p__Proteobacteria; c__Alphaproteobacteria; o__Hyphomicrobiales; f__Rhizobiaceae; g__Agrobacterium; s__vitis
382	0	0	0	0	1	k__Bacteria; p__Proteobacteria; c__Alphaproteobacteria; o__Hyphomicrobiales; f__Rhizobiaceae; g__Sinorhizobium; s__meliloti
106592	0	0	0	0	1	k__Bacteria; p__Proteobacteria; c__Alphaproteobacteria; o__Hyphomicrobiales; f__Rhizobiaceae; g__Ensifer; s__adhaerens
34021	0	0	0	0	1	k__Bacteria; p__Proteobacteria; c__Alphaproteobacteria; o__Hyphomicrobiales; f__Rhizobiaceae; g__Liberibacter; s__Candidatus Liberibacter asiaticus
879274	0	0	0	0	1	k__Bacteria; p__Proteobacteria; c__Alphaproteobacteria; o__Hyphomicrobiales; f__Rhizobiaceae; g__Shinella; s__sp. HZN7
2499144	0	0	0	0	1	k__Bacteria; p__Proteobacteria; c__Alphaproteobacteria; o__Hyphomicrobiales; f__Hyphomicrobiaceae; g__Devosia; s__sp. 1566
569860	0	0	0	0	1	k__Bacteria; p__Proteobacteria; c__Alphaproteobacteria; o__Hyphomicrobiales; f__Beijerinckiaceae; g__Methylovirgula; s__ligni
2759526	0	0	0	0	1	k__Bacteria; p__Proteobacteria; c__Alphaproteobacteria; o__Sphingomonadales; f__Sphingomonadaceae; g__Sphingomonas; s__sp. DH-S5
1523415	0	0	0	0	1	k__Bacteria; p__Proteobacteria; c__Alphaproteobacteria; o__Sphingomonadales; f__Sphingomonadaceae; g__Sphingomonas; s__sp. AAP5
1517551	0	0	0	0	1	k__Bacteria; p__Proteobacteria; c__Alphaproteobacteria; o__Sphingomonadales; f__Sphingomonadaceae; g__Sphingomonas; s__sp. HMP6
2711215	0	0	0	0	1	k__Bacteria; p__Proteobacteria; c__Alphaproteobacteria; o__Sphingomonadales; f__Sphingomonadaceae; g__Sphingosinithalassobacter; s__sp. zrk23
337479	0	0	0	0	1	k__Bacteria; p__Proteobacteria; c__Alphaproteobacteria; o__Rickettsiales; f__Rickettsiaceae; g__Rickettsia; s__endosymbiont of Bemisia tabaci
1715691	0	0	0	0	1	k__Bacteria; p__Proteobacteria; c__Alphaproteobacteria; o__Rhodobacterales; f__Rhodobacteraceae; g__Cognatishimia; s__activa
379347	0	0	0	0	1	k__Bacteria; p__Proteobacteria; c__Alphaproteobacteria; o__Rhodobacterales; f__Rhodobacteraceae; g__Epibacterium; s__mobile
349221	0	0	0	0	1	k__Bacteria; p__Proteobacteria; c__Alphaproteobacteria; o__Rhodobacterales; f__Rhodobacteraceae; g__Micavibrio; s__aeruginosavorus
2478912	0	0	0	0	1	k__Bacteria; p__Proteobacteria; c__Alphaproteobacteria; o__Rhodospirillales; f__Acetobacteraceae; g__Commensalibacter; s__sp. AMU001
152500	0	0	0	0	1	k__Bacteria; p__Proteobacteria; c__Betaproteobacteria; o__Burkholderiales; f__Burkholderiaceae; g__Burkholderia; s__dolosa
48736	0	0	0	0	1	k__Bacteria; p__Proteobacteria; c__Betaproteobacteria; o__Burkholderiales; f__Burkholderiaceae; g__Ralstonia; s__
329	0	0	0	0	1	k__Bacteria; p__Proteobacteria; c__Betaproteobacteria; o__Burkholderiales; f__Burkholderiaceae; g__Ralstonia; s__pickettii
75105	0	0	0	0	1	k__Bacteria; p__Proteobacteria; c__Betaproteobacteria; o__Burkholderiales; f__Burkholderiaceae; g__Paraburkholderia; s__caribensis
553814	0	0	0	0	1	k__Bacteria; p__Proteobacteria; c__Betaproteobacteria; o__Burkholderiales; f__Comamonadaceae; g__Acidovorax; s__carolinensis
34072	0	0	0	0	1	k__Bacteria; p__Proteobacteria; c__Betaproteobacteria; o__Burkholderiales; f__Comamonadaceae; g__Variovorax; s__
216465	0	0	0	0	1	k__Bacteria; p__Proteobacteria; c__Betaproteobacteria; o__Burkholderiales; f__Comamonadaceae; g__Polaromonas; s__naphthalenivorans
2109914	0	0	0	0	1	k__Bacteria; p__Proteobacteria; c__Betaproteobacteria; o__Burkholderiales; f__Comamonadaceae; g__Ottowia; s__oryzae
34029	0	0	0	0	1	k__Bacteria; p__Proteobacteria; c__Betaproteobacteria; o__Burkholderiales; f__Comamonadaceae; g__Leptothrix; s__cholodnii
401471	0	0	0	0	1	k__Bacteria; p__Proteobacteria; c__Betaproteobacteria; o__Burkholderiales; f__Oxalobacteraceae; g__Undibacterium; s__parvum
194197	0	0	0	0	1	k__Bacteria; p__Proteobacteria; c__Betaproteobacteria; o__Neisseriales; f__Neisseriaceae; g__Neisseria; s__dentiae
1660076	0	0	0	0	1	k__Bacteria; p__Proteobacteria; c__Epsilonproteobacteria; o__Campylobacterales; f__Campylobacteraceae; g__Campylobacter; s__sp. RM12175
196	0	0	0	0	1	k__Bacteria; p__Proteobacteria; c__Epsilonproteobacteria; o__Campylobacterales; f__Campylobacteraceae; g__Campylobacter; s__fetus
1965231	0	0	0	0	1	k__Bacteria; p__Proteobacteria; c__Epsilonproteobacteria; o__Campylobacterales; f__Campylobacteraceae; g__Campylobacter; s__pinnipediorum
1031542	0	0	0	0	1	k__Bacteria; p__Proteobacteria; c__Epsilonproteobacteria; o__Campylobacterales; f__Campylobacteraceae; g__Campylobacter; s__volucris
497724	0	0	0	0	1	k__Bacteria; p__Proteobacteria; c__Epsilonproteobacteria; o__Campylobacterales; f__Campylobacteraceae; g__Campylobacter; s__subantarcticus
75658	0	0	0	0	1	k__Bacteria; p__Proteobacteria; c__Epsilonproteobacteria; o__Campylobacterales; f__Campylobacteraceae; g__Campylobacter; s__lanienae
28898	0	0	0	0	1	k__Bacteria; p__Proteobacteria; c__Epsilonproteobacteria; o__Campylobacterales; f__Campylobacteraceae; g__Campylobacter; s__helveticus
663364	0	0	0	0	1	k__Bacteria; p__Proteobacteria; c__Epsilonproteobacteria; o__Campylobacterales; f__Campylobacteraceae; g__Halarcobacter; s__bivalviorum
135569	0	0	0	0	1	k__Bacteria; p__Proteobacteria; c__Epsilonproteobacteria; o__Campylobacterales; f__Helicobacteraceae; g__Helicobacter; s__apodemus
202747	0	0	0	0	1	k__Bacteria; p__Proteobacteria; c__Epsilonproteobacteria; o__Campylobacterales; f__Thiovulaceae; g__Sulfurimonas; s__autotrophica
291048	0	0	0	0	1	k__Bacteria; p__Proteobacteria; c__Epsilonproteobacteria; o__Nautiliales; f__Nautiliaceae; g__Caminibacter; s__mediatlanticus
571177	0	0	0	0	1	k__Bacteria; p__Proteobacteria; c__Deltaproteobacteria; o__Desulfobacterales; f__Desulfobacteraceae; g__Desulfosarcina; s__alkanivorans
28223	0	0	0	0	1	k__Bacteria; p__Proteobacteria; c__Deltaproteobacteria; o__Desulfobacterales; f__Desulfobacteraceae; g__Desulfobacula; s__toluolica
194924	0	0	0	0	1	k__Bacteria; p__Proteobacteria; c__Deltaproteobacteria; o__Desulfovibrionales; f__Desulfovibrionaceae; g__; s__
191026	0	0	0	0	1	k__Bacteria; p__Proteobacteria; c__Deltaproteobacteria; o__Desulfovibrionales; f__Desulfovibrionaceae; g__Maridesulfovibrio; s__hydrothermalis
2724135	0	0	0	0	1	k__Bacteria; p__Bacteroidetes; c__Flavobacteriia; o__Flavobacteriales; f__Flavobacteriaceae; g__Flavobacterium; s__sp. CLA17
983544	0	0	0	0	1	k__Bacteria; p__Bacteroidetes; c__Flavobacteriia; o__Flavobacteriales; f__Flavobacteriaceae; g__Lacinutrix; s__sp. 5H-3-7-4
1850252	0	0	0	0	1	k__Bacteria; p__Bacteroidetes; c__Flavobacteriia; o__Flavobacteriales; f__Flavobacteriaceae; g__Tenacibaculum; s__todarodis
2494375	0	0	0	0	1	k__Bacteria; p__Bacteroidetes; c__Flavobacteriia; o__Flavobacteriales; f__Flavobacteriaceae; g__Aequorivita; s__sp. H23M31
1803846	0	0	0	0	1	k__Bacteria; p__Bacteroidetes; c__Flavobacteriia; o__Flavobacteriales; f__Flavobacteriaceae; g__Flavivirga; s__eckloniae
319236	0	0	0	0	1	k__Bacteria; p__Bacteroidetes; c__Flavobacteriia; o__Flavobacteriales; f__Flavobacteriaceae; g__Nonlabens; s__sediminis
111501	0	0	0	0	1	k__Bacteria; p__Bacteroidetes; c__Flavobacteriia; o__Flavobacteriales; f__Flavobacteriaceae; g__Muricauda; s__ruestringensis
2708117	0	0	0	0	1	k__Bacteria; p__Bacteroidetes; c__Flavobacteriia; o__Flavobacteriales; f__Flavobacteriaceae; g__Capnocytophaga; s__endodontalis
1813611	0	0	0	0	1	k__Bacteria; p__Bacteroidetes; c__Flavobacteriia; o__Flavobacteriales; f__Weeksellaceae; g__Chryseobacterium; s__cucumeris
59734	0	0	0	0	1	k__Bacteria; p__Bacteroidetes; c__Flavobacteriia; o__Flavobacteriales; f__Weeksellaceae; g__Empedobacter; s__
1628248	0	0	0	0	1	k__Bacteria; p__Bacteroidetes; c__Flavobacteriia; o__Flavobacteriales; f__Weeksellaceae; g__Empedobacter; s__stercoris
1117645	0	0	0	0	1	k__Bacteria; p__Bacteroidetes; c__Flavobacteriia; o__Flavobacteriales; f__Weeksellaceae; g__Elizabethkingia; s__anophelis
1756150	0	0	0	0	1	k__Bacteria; p__Bacteroidetes; c__Flavobacteriia; o__Flavobacteriales; f__Weeksellaceae; g__Elizabethkingia; s__ursingii
2583851	0	0	0	0	1	k__Bacteria; p__Bacteroidetes; c__Flavobacteriia; o__Flavobacteriales; f__Weeksellaceae; g__Elizabethkingia; s__sp. JS20170427COW
1316444	0	0	0	0	1	k__Bacteria; p__Bacteroidetes; c__Flavobacteriia; o__Flavobacteriales; f__Blattabacteriaceae; g__Blattabacterium; s__sp. (Nauphoeta cinerea)
84566	0	0	0	0	1	k__Bacteria; p__Bacteroidetes; c__Sphingobacteriia; o__Sphingobacteriales; f__Sphingobacteriaceae; g__; s__
1010	0	0	0	0	1	k__Bacteria; p__Bacteroidetes; c__Sphingobacteriia; o__Sphingobacteriales; f__Sphingobacteriaceae; g__Sphingobacterium; s__mizutaii
2578106	0	0	0	0	1	k__Bacteria; p__Bacteroidetes; c__Sphingobacteriia; o__Sphingobacteriales; f__Sphingobacteriaceae; g__Pedobacter; s__sp. KBS0701
423349	0	0	0	0	1	k__Bacteria; p__Bacteroidetes; c__Sphingobacteriia; o__Sphingobacteriales; f__Sphingobacteriaceae; g__Mucilaginibacter; s__
89966	0	0	0	0	1	k__Bacteria; p__Bacteroidetes; c__Cytophagia; o__Cytophagales; f__Hymenobacteraceae; g__Hymenobacter; s__
2591634	0	0	0	0	1	k__Bacteria; p__Bacteroidetes; c__Cytophagia; o__Cytophagales; f__Cyclobacteriaceae; g__Echinicola; s__sp. LN3S3
1267423	0	0	0	0	1	k__Bacteria; p__Bacteroidetes; c__Cytophagia; o__Cytophagales; f__Roseivirgaceae; g__Roseivirga; s__pacifica
246787	0	0	0	0	1	k__Bacteria; p__Bacteroidetes; c__Bacteroidia; o__Bacteroidales; f__Bacteroidaceae; g__Bacteroides; s__cellulosilyticus
1177574	0	0	0	0	1	k__Bacteria; p__Bacteroidetes; c__Bacteroidia; o__Bacteroidales; f__Prevotellaceae; g__Prevotella; s__jejuni
563835	0	0	0	0	1	k__Bacteria; p__Bacteroidetes; c__Chitinophagia; o__Chitinophagales; f__Chitinophagaceae; g__; s__
477680	0	0	0	0	1	k__Bacteria; p__Bacteroidetes; c__Chitinophagia; o__Chitinophagales; f__Chitinophagaceae; g__Filimonas; s__lacunae
141	0	0	0	0	1	k__Bacteria; p__Spirochaetes; c__Spirochaetia; o__Spirochaetales; f__Borreliaceae; g__Borrelia; s__parkeri
172	0	0	0	0	1	k__Bacteria; p__Spirochaetes; c__Spirochaetia; o__Leptospirales; f__Leptospiraceae; g__Leptospira; s__biflexa
174	0	0	0	0	1	k__Bacteria; p__Spirochaetes; c__Spirochaetia; o__Leptospirales; f__Leptospiraceae; g__Leptospira; s__borgpetersenii
83554	0	0	0	0	1	k__Bacteria; p__Chlamydiae; c__Chlamydiia; o__Chlamydiales; f__Chlamydiaceae; g__Chlamydia; s__psittaci
83558	0	0	0	0	1	k__Bacteria; p__Chlamydiae; c__Chlamydiia; o__Chlamydiales; f__Chlamydiaceae; g__Chlamydia; s__pneumoniae
1353976	0	0	0	0	1	k__Bacteria; p__Chlamydiae; c__Chlamydiia; o__Parachlamydiales; f__Parachlamydiaceae; g__Neochlamydia; s__sp. S13
119	0	0	0	0	1	k__Bacteria; p__Planctomycetes; c__Planctomycetia; o__Planctomycetales; f__Planctomycetaceae; g__Rubinisphaera; s__brasiliensis
1653476	0	0	0	0	1	k__Bacteria; p__Thermodesulfobacteria; c__Thermodesulfobacteria; o__Thermodesulfobacteriales; f__Thermodesulfobacteriaceae; g__Caldimicrobium; s__thiodismutans
118062	0	0	0	0	1	k__Archaea; p__Euryarchaeota; c__Methanobacteria; o__Methanobacteriales; f__Methanobacteriaceae; g__Methanobacterium; s__congolense
868131	0	0	0	0	1	k__Archaea; p__Euryarchaeota; c__Methanobacteria; o__Methanobacteriales; f__Methanobacteriaceae; g__Methanobacterium; s__paludis
570267	0	0	0	0	1	k__Archaea; p__Euryarchaeota; c__Methanomicrobia; o__Methanocellales; f__Methanocellaceae; g__Methanocella; s__paludicola
2663020	0	0	0	0	1	k__Archaea; p__Crenarchaeota; c__Thermoprotei; o__Sulfolobales; f__Sulfolobaceae; g__Sulfolobus; s__sp. E11-6
41673	0	0	0	0	1	k__Archaea; p__Crenarchaeota; c__Thermoprotei; o__Sulfolobales; f__Sulfolobaceae; g__Acidianus; s__brierleyi
1532350	0	0	0	0	1	k__Archaea; p__Crenarchaeota; c__Thermoprotei; o__Sulfolobales; f__Sulfolobaceae; g__Metallosphaera; s__tengchongensis
2277	0	0	0	0	1	k__Archaea; p__Crenarchaeota; c__Thermoprotei; o__Thermoproteales; f__Thermoproteaceae; g__Pyrobaculum; s__islandicum
1459637	0	0	0	0	1	k__Archaea; p__Thaumarchaeota; c__Nitrososphaeria; o__Nitrososphaerales; f__Nitrososphaeraceae; g__Nitrososphaera; s__Candidatus Nitrososphaera evergladensis
498374	0	0	0	0	1	k__Archaea; p__Thaumarchaeota; c__Nitrososphaeria; o__Candidatus Nitrosocaldales; f__Candidatus Nitrosocaldaceae; g__Candidatus Nitrosocaldus; s__
1572712	0	0	0	0	1	k__Viruses; p__Uroviricota; c__Caudoviricetes; o__Caudovirales; f__Siphoviridae; g__; s__Geobacillus virus E3
10286	0	0	0	0	1	k__Viruses; p__Nucleocytoviricota; c__Pokkesviricetes; o__Chitovirales; f__Poxviridae; g__Betaentomopoxvirus; s__
1972596	0	0	0	0	1	k__Viruses; p__Negarnaviricota; c__Monjiviricetes; o__Mononegavirales; f__Rhabdoviridae; g__Ephemerovirus; s__Koolpinyah ephemerovirus
1120751	0	0	0	0	1	k__Viruses; p__Pisuviricota; c__Pisoniviricetes; o__Picornavirales; f__Secoviridae; g__Sadwavirus; s__Chocolate lily virus A
1150	36	0	0	0	0	k__Bacteria; p__Cyanobacteria; c__; o__Oscillatoriales; f__; g__; s__
118562	197	0	0	0	0	k__Bacteria; p__Cyanobacteria; c__; o__Oscillatoriales; f__Microcoleaceae; g__Arthrospira; s__platensis
147317	3	0	0	0	0	k__Bacteria; p__Cyanobacteria; c__; o__Oscillatoriales; f__Microcoleaceae; g__Arthrospira; s__sp. PCC 9108
1160	9	0	0	0	0	k__Bacteria; p__Cyanobacteria; c__; o__Oscillatoriales; f__Microcoleaceae; g__Planktothrix; s__agardhii
118323	2	0	0	0	0	k__Bacteria; p__Cyanobacteria; c__; o__Oscillatoriales; f__Oscillatoriaceae; g__Oscillatoria; s__acuminata
241425	1	0	0	0	0	k__Bacteria; p__Cyanobacteria; c__; o__Oscillatoriales; f__Gomontiellaceae; g__Crinalium; s__epipsammum
2005460	1	0	3	0	0	k__Bacteria; p__Cyanobacteria; c__; o__Chroococcales; f__Chroococcaceae; g__Chondrocystis; s__sp. NIES-4102
1125	1	0	0	0	0	k__Bacteria; p__Cyanobacteria; c__; o__Chroococcales; f__Microcystaceae; g__Microcystis; s__
1126	1	0	0	0	0	k__Bacteria; p__Cyanobacteria; c__; o__Chroococcales; f__Microcystaceae; g__Microcystis; s__aeruginosa
1162	1	0	0	0	0	k__Bacteria; p__Cyanobacteria; c__; o__Nostocales; f__Nostocaceae; g__; s__
1618022	1	0	0	0	0	k__Bacteria; p__Cyanobacteria; c__; o__Nostocales; f__Nostocaceae; g__Nostoc; s__sp. 'Lobaria pulmonaria (5183) cyanobiont'
2576904	1	0	1	0	0	k__Bacteria; p__Cyanobacteria; c__; o__Nostocales; f__Nostocaceae; g__Nostoc; s__sp. TCL26-01
92942	1	0	0	0	0	k__Bacteria; p__Cyanobacteria; c__; o__Nostocales; f__Nostocaceae; g__Nostoc; s__linckia
1647413	1	0	1	0	0	k__Bacteria; p__Cyanobacteria; c__; o__Nostocales; f__Nostocaceae; g__Anabaena; s__sp. WA102
2005464	1	0	0	0	0	k__Bacteria; p__Cyanobacteria; c__; o__Nostocales; f__Scytonemataceae; g__Scytonema; s__sp. NIES-4073
1197	1	0	0	0	0	k__Bacteria; p__Cyanobacteria; c__; o__Nostocales; f__Rivulariaceae; g__Microchaete; s__diplosiphon
109266	1	0	0	0	0	k__Bacteria; p__Cyanobacteria; c__; o__Nostocales; f__Aphanizomenonaceae; g__Anabaenopsis; s__circularis
1386941	1	0	0	0	0	k__Bacteria; p__Cyanobacteria; c__; o__Synechococcales; f__Synechococcaceae; g__Synechococcus; s__sp. MVIR-18-1
685565	1	0	1	0	0	k__Bacteria; p__Cyanobacteria; c__; o__Synechococcales; f__Pseudanabaenaceae; g__Pseudanabaena; s__sp. ABRG5-3
102116	1	0	0	0	0	k__Bacteria; p__Cyanobacteria; c__; o__Pleurocapsales; f__Dermocarpellaceae; g__Stanieria; s__cyanosphaera
1188228	1	0	0	0	0	k__Bacteria; p__Cyanobacteria; c__; o__Gloeoemargaritales; f__Gloeomargaritaceae; g__Gloeomargarita; s__lithophora
1589	2	0	0	0	0	k__Bacteria; p__Firmicutes; c__Bacilli; o__Lactobacillales; f__Lactobacillaceae; g__Lactiplantibacillus; s__pentosus
114090	1	0	0	0	0	k__Bacteria; p__Firmicutes; c__Bacilli; o__Lactobacillales; f__Lactobacillaceae; g__Pediococcus; s__inopinatus
1254	1	0	0	0	0	k__Bacteria; p__Firmicutes; c__Bacilli; o__Lactobacillales; f__Lactobacillaceae; g__Pediococcus; s__acidilactici
267818	1	0	0	0	0	k__Bacteria; p__Firmicutes; c__Bacilli; o__Lactobacillales; f__Lactobacillaceae; g__Lactobacillus; s__kefiranofaciens
109790	1	0	0	0	0	k__Bacteria; p__Firmicutes; c__Bacilli; o__Lactobacillales; f__Lactobacillaceae; g__Lactobacillus; s__jensenii
1579	1	0	0	0	0	k__Bacteria; p__Firmicutes; c__Bacilli; o__Lactobacillales; f__Lactobacillaceae; g__Lactobacillus; s__acidophilus
1162633	2	0	0	0	0	k__Bacteria; p__Firmicutes; c__Bacilli; o__Lactobacillales; f__Lactobacillaceae; g__Weissella; s__diestrammenae
137591	1	0	0	0	0	k__Bacteria; p__Firmicutes; c__Bacilli; o__Lactobacillales; f__Lactobacillaceae; g__Weissella; s__cibaria
1618	2	0	0	0	0	k__Bacteria; p__Firmicutes; c__Bacilli; o__Lactobacillales; f__Lactobacillaceae; g__Liquorilactobacillus; s__mali
1598	1	0	1	0	0	k__Bacteria; p__Firmicutes; c__Bacilli; o__Lactobacillales; f__Lactobacillaceae; g__Limosilactobacillus; s__reuteri
1613	1	0	0	0	0	k__Bacteria; p__Firmicutes; c__Bacilli; o__Lactobacillales; f__Lactobacillaceae; g__Limosilactobacillus; s__fermentum
1244	2	0	1	0	0	k__Bacteria; p__Firmicutes; c__Bacilli; o__Lactobacillales; f__Lactobacillaceae; g__Leuconostoc; s__gelidum
1303590	1	0	0	0	0	k__Bacteria; p__Firmicutes; c__Bacilli; o__Lactobacillales; f__Lactobacillaceae; g__Bombilactobacillus; s__bombi
1720083	1	0	0	0	0	k__Bacteria; p__Firmicutes; c__Bacilli; o__Lactobacillales; f__Lactobacillaceae; g__Acetilactobacillus; s__jinshanensis
1597	1	0	0	0	0	k__Bacteria; p__Firmicutes; c__Bacilli; o__Lactobacillales; f__Lactobacillaceae; g__Lacticaseibacillus; s__paracasei
197614	1	0	0	0	0	k__Bacteria; p__Firmicutes; c__Bacilli; o__Lactobacillales; f__Streptococcaceae; g__Streptococcus; s__pasteurianus
150055	1	0	0	0	0	k__Bacteria; p__Firmicutes; c__Bacilli; o__Lactobacillales; f__Streptococcaceae; g__Streptococcus; s__lutetiensis
1334	1	0	0	0	0	k__Bacteria; p__Firmicutes; c__Bacilli; o__Lactobacillales; f__Streptococcaceae; g__Streptococcus; s__dysgalactiae
1335	1	0	0	0	0	k__Bacteria; p__Firmicutes; c__Bacilli; o__Lactobacillales; f__Streptococcaceae; g__Streptococcus; s__equinus
1314	1	0	0	0	0	k__Bacteria; p__Firmicutes; c__Bacilli; o__Lactobacillales; f__Streptococcaceae; g__Streptococcus; s__pyogenes
1309	1	0	0	0	0	k__Bacteria; p__Firmicutes; c__Bacilli; o__Lactobacillales; f__Streptococcaceae; g__Streptococcus; s__mutans
1358	2	0	0	0	0	k__Bacteria; p__Firmicutes; c__Bacilli; o__Lactobacillales; f__Streptococcaceae; g__Lactococcus; s__lactis
1366	1	0	0	0	0	k__Bacteria; p__Firmicutes; c__Bacilli; o__Lactobacillales; f__Streptococcaceae; g__Lactococcus; s__raffinolactis
1350	1	0	0	0	0	k__Bacteria; p__Firmicutes; c__Bacilli; o__Lactobacillales; f__Enterococcaceae; g__Enterococcus; s__
1353	1	0	0	0	0	k__Bacteria; p__Firmicutes; c__Bacilli; o__Lactobacillales; f__Enterococcaceae; g__Enterococcus; s__gallinarum
218144	2	0	0	0	0	k__Bacteria; p__Firmicutes; c__Bacilli; o__Lactobacillales; f__Enterococcaceae; g__Vagococcus; s__carniphilus
526944	1	0	0	0	0	k__Bacteria; p__Firmicutes; c__Bacilli; o__Lactobacillales; f__Enterococcaceae; g__Tetragenococcus; s__osmophilus
1903686	1	0	0	0	0	k__Bacteria; p__Firmicutes; c__Bacilli; o__Lactobacillales; f__Carnobacteriaceae; g__Jeotgalibaca; s__sp. PTS2502
87541	1	0	0	0	0	k__Bacteria; p__Firmicutes; c__Bacilli; o__Lactobacillales; f__Aerococcaceae; g__Aerococcus; s__christensenii
2026190	1	0	0	0	0	k__Bacteria; p__Firmicutes; c__Bacilli; o__Bacillales; f__Bacillaceae; g__Bacillus; s__mobilis
2779776	2	0	0	0	0	k__Bacteria; p__Firmicutes; c__Bacilli; o__Bacillales; f__Bacillaceae; g__Bacillus; s__sp. HD4P25
352858	1	0	1	0	0	k__Bacteria; p__Firmicutes; c__Bacilli; o__Bacillales; f__Bacillaceae; g__Bacillus; s__sp. Y1
46224	2	0	1	0	0	k__Bacteria; p__Firmicutes; c__Bacilli; o__Bacillales; f__Bacillaceae; g__Bacillus; s__sporothermodurans
1413	1	0	3	0	0	k__Bacteria; p__Firmicutes; c__Bacilli; o__Bacillales; f__Bacillaceae; g__Bacillus; s__cellulosilyticus
1783501	1	0	0	0	0	k__Bacteria; p__Firmicutes; c__Bacilli; o__Bacillales; f__Bacillaceae; g__Bacillus; s__freudenreichii
561879	1	0	0	0	0	k__Bacteria; p__Firmicutes; c__Bacilli; o__Bacillales; f__Bacillaceae; g__Bacillus; s__safensis
1397	1	0	1	0	0	k__Bacteria; p__Firmicutes; c__Bacilli; o__Bacillales; f__Bacillaceae; g__Bacillus; s__circulans
33938	1	0	0	0	0	k__Bacteria; p__Firmicutes; c__Bacilli; o__Bacillales; f__Bacillaceae; g__Geobacillus; s__thermocatenulatus
79880	2	0	2	0	0	k__Bacteria; p__Firmicutes; c__Bacilli; o__Bacillales; f__Bacillaceae; g__Alkalihalobacillus; s__clausii
79885	2	0	0	0	0	k__Bacteria; p__Firmicutes; c__Bacilli; o__Bacillales; f__Bacillaceae; g__Alkalihalobacillus; s__pseudofirmus
2283160	2	0	0	0	0	k__Bacteria; p__Firmicutes; c__Bacilli; o__Bacillales; f__Bacillaceae; g__Psychrobacillus; s__glaciei
2303505	1	0	1	0	0	k__Bacteria; p__Firmicutes; c__Bacilli; o__Bacillales; f__Bacillaceae; g__Psychrobacillus; s__sp. AK 1817
403957	1	0	0	0	0	k__Bacteria; p__Firmicutes; c__Bacilli; o__Bacillales; f__Bacillaceae; g__Virgibacillus; s__sp. SK37
1398	1	0	0	0	0	k__Bacteria; p__Firmicutes; c__Bacilli; o__Bacillales; f__Bacillaceae; g__Weizmannia; s__coagulans
1467	1	0	0	0	0	k__Bacteria; p__Firmicutes; c__Bacilli; o__Bacillales; f__Bacillaceae; g__Lederbergia; s__lentus
2743001	1	0	0	0	0	k__Bacteria; p__Firmicutes; c__Bacilli; o__Bacillales; f__Bacillaceae; g__Salicibibacter; s__sp. NKC21-4
279826	1	0	0	0	0	k__Bacteria; p__Firmicutes; c__Bacilli; o__Bacillales; f__Bacillaceae; g__Mesobacillus; s__foraminis
1478	1	0	1	0	0	k__Bacteria; p__Firmicutes; c__Bacilli; o__Bacillales; f__Bacillaceae; g__Peribacillus; s__simplex
33934	1	0	0	0	0	k__Bacteria; p__Firmicutes; c__Bacilli; o__Bacillales; f__Bacillaceae; g__Anoxybacillus; s__flavithermus
214473	52	0	1	0	0	k__Bacteria; p__Firmicutes; c__Bacilli; o__Bacillales; f__Staphylococcaceae; g__Staphylococcus; s__nepalensis
29384	5	0	0	0	0	k__Bacteria; p__Firmicutes; c__Bacilli; o__Bacillales; f__Staphylococcaceae; g__Staphylococcus; s__kloosii
283734	1	0	0	0	0	k__Bacteria; p__Firmicutes; c__Bacilli; o__Bacillales; f__Staphylococcaceae; g__Staphylococcus; s__pseudintermedius
155085	1	0	0	0	0	k__Bacteria; p__Firmicutes; c__Bacilli; o__Bacillales; f__Staphylococcaceae; g__Staphylococcus; s__lutrae
2282419	1	0	1	0	0	k__Bacteria; p__Firmicutes; c__Bacilli; o__Bacillales; f__Staphylococcaceae; g__Staphylococcus; s__pseudoxylosus
2781774	1	0	0	0	0	k__Bacteria; p__Firmicutes; c__Bacilli; o__Bacillales; f__Staphylococcaceae; g__Staphylococcus; s__lloydii
69965	1	0	2	0	0	k__Bacteria; p__Firmicutes; c__Bacilli; o__Bacillales; f__Staphylococcaceae; g__Macrococcus; s__
69966	4	0	1	0	0	k__Bacteria; p__Firmicutes; c__Bacilli; o__Bacillales; f__Staphylococcaceae; g__Macrococcus; s__caseolyticus
1903056	1	0	0	0	0	k__Bacteria; p__Firmicutes; c__Bacilli; o__Bacillales; f__Staphylococcaceae; g__Macrococcus; s__bohemicus
946432	1	0	0	0	0	k__Bacteria; p__Firmicutes; c__Bacilli; o__Bacillales; f__Staphylococcaceae; g__Jeotgalicoccus; s__[Micrococcus] candicans
643214	1	0	0	0	0	k__Bacteria; p__Firmicutes; c__Bacilli; o__Bacillales; f__Staphylococcaceae; g__Mammaliicoccus; s__stepanovicii
1750719	7	0	0	0	0	k__Bacteria; p__Firmicutes; c__Bacilli; o__Bacillales; f__Planococcaceae; g__Kurthia; s__sp. 11kri321
192421	1	0	0	0	0	k__Bacteria; p__Firmicutes; c__Bacilli; o__Bacillales; f__Planococcaceae; g__Planococcus; s__maritimus
2283194	1	0	0	0	0	k__Bacteria; p__Firmicutes; c__Bacilli; o__Bacillales; f__Planococcaceae; g__Sporosarcina; s__sp. PTS2304
417367	1	0	0	0	0	k__Bacteria; p__Firmicutes; c__Bacilli; o__Bacillales; f__Planococcaceae; g__Paenisporosarcina; s__antarctica
360911	8	0	0	0	0	k__Bacteria; p__Firmicutes; c__Bacilli; o__Bacillales; f__Planococcaceae; g__Exiguobacterium; s__sp. AT1b
1389960	1	0	0	0	0	k__Bacteria; p__Firmicutes; c__Bacilli; o__Bacillales; f__Planococcaceae; g__Exiguobacterium; s__sp. S3-2
340146	1	0	0	0	0	k__Bacteria; p__Firmicutes; c__Bacilli; o__Bacillales; f__Planococcaceae; g__Exiguobacterium; s__mexicanum
1379	1	0	0	0	0	k__Bacteria; p__Firmicutes; c__Bacilli; o__Bacillales; f__Planococcaceae; g__Gemella; s__haemolysans
84135	1	0	0	0	0	k__Bacteria; p__Firmicutes; c__Bacilli; o__Bacillales; f__Planococcaceae; g__Gemella; s__sanguinis
324057	1	0	0	0	0	k__Bacteria; p__Firmicutes; c__Bacilli; o__Bacillales; f__Paenibacillaceae; g__Paenibacillus; s__sp. JDR-2
528191	1	0	0	0	0	k__Bacteria; p__Firmicutes; c__Bacilli; o__Bacillales; f__Paenibacillaceae; g__Paenibacillus; s__xylanexedens
562959	1	0	0	0	0	k__Bacteria; p__Firmicutes; c__Bacilli; o__Bacillales; f__Paenibacillaceae; g__Paenibacillus; s__cellulositrophicus
248903	1	0	0	0	0	k__Bacteria; p__Firmicutes; c__Bacilli; o__Bacillales; f__Paenibacillaceae; g__Paenibacillus; s__xylanilyticus
198119	1	0	0	0	0	k__Bacteria; p__Firmicutes; c__Bacilli; o__Bacillales; f__Paenibacillaceae; g__Paenibacillus; s__barcinonensis
1640	1	0	0	0	0	k__Bacteria; p__Firmicutes; c__Bacilli; o__Bacillales; f__Listeriaceae; g__Listeria; s__seeligeri
1844999	1	0	1	0	0	k__Bacteria; p__Firmicutes; c__Bacilli; o__Bacillales; f__Listeriaceae; g__Listeria; s__sp. PSOL-1
2756	2	0	0	0	0	k__Bacteria; p__Firmicutes; c__Bacilli; o__Bacillales; f__Listeriaceae; g__Brochothrix; s__thermosphacta
471514	1	0	0	0	0	k__Bacteria; p__Firmicutes; c__Bacilli; o__Bacillales; f__Alicyclobacillaceae; g__Alicyclobacillus; s__ferrooxydans
186802	1	0	6	0	0	k__Bacteria; p__Firmicutes; c__Clostridia; o__Eubacteriales; f__; g__; s__
755731	1	0	0	0	0	k__Bacteria; p__Firmicutes; c__Clostridia; o__Eubacteriales; f__Clostridiaceae; g__Clostridium; s__sp. BNL1100
2320868	1	0	2	0	0	k__Bacteria; p__Firmicutes; c__Clostridia; o__Eubacteriales; f__Clostridiaceae; g__Clostridium; s__sp. CT4
1504	2	0	3	0	0	k__Bacteria; p__Firmicutes; c__Clostridia; o__Eubacteriales; f__Clostridiaceae; g__Clostridium; s__septicum
1493	2	0	1	0	0	k__Bacteria; p__Firmicutes; c__Clostridia; o__Eubacteriales; f__Clostridiaceae; g__Clostridium; s__cellulovorans
1542	2	0	5	0	0	k__Bacteria; p__Firmicutes; c__Clostridia; o__Eubacteriales; f__Clostridiaceae; g__Clostridium; s__novyi
1488	1	0	2	0	0	k__Bacteria; p__Firmicutes; c__Clostridia; o__Eubacteriales; f__Clostridiaceae; g__Clostridium; s__acetobutylicum
1716543	1	0	2	0	0	k__Bacteria; p__Firmicutes; c__Clostridia; o__Eubacteriales; f__Clostridiaceae; g__Clostridium; s__thermarum
1216932	1	0	4	0	0	k__Bacteria; p__Firmicutes; c__Clostridia; o__Eubacteriales; f__Clostridiaceae; g__Clostridium; s__bornimense
217159	1	0	1	0	0	k__Bacteria; p__Firmicutes; c__Clostridia; o__Eubacteriales; f__Clostridiaceae; g__Clostridium; s__carboxidivorans
1534	1	0	3	0	0	k__Bacteria; p__Firmicutes; c__Clostridia; o__Eubacteriales; f__Clostridiaceae; g__Clostridium; s__kluyveri
1494	1	0	2	0	0	k__Bacteria; p__Firmicutes; c__Clostridia; o__Eubacteriales; f__Clostridiaceae; g__Clostridium; s__cochlearium
208226	2	0	2	0	0	k__Bacteria; p__Firmicutes; c__Clostridia; o__Eubacteriales; f__Clostridiaceae; g__Alkaliphilus; s__metalliredigens
1498	1	0	0	0	0	k__Bacteria; p__Firmicutes; c__Clostridia; o__Eubacteriales; f__Clostridiaceae; g__Hathewaya; s__histolytica
2724150	2	0	1	0	0	k__Bacteria; p__Firmicutes; c__Clostridia; o__Eubacteriales; f__Peptostreptococcaceae; g__Romboutsia; s__sp. CE17
29370	1	0	1	0	0	k__Bacteria; p__Firmicutes; c__Clostridia; o__Eubacteriales; f__Lachnospiraceae; g__Lacrimispora; s__sphenoides
1531	1	0	0	0	0	k__Bacteria; p__Firmicutes; c__Clostridia; o__Eubacteriales; f__Lachnospiraceae; g__Enterocloster; s__clostridioformis
39485	1	0	1	0	0	k__Bacteria; p__Firmicutes; c__Clostridia; o__Eubacteriales; f__Lachnospiraceae; g__Lachnospira; s__eligens
185007	1	0	0	0	0	k__Bacteria; p__Firmicutes; c__Clostridia; o__Eubacteriales; f__Lachnospiraceae; g__Pseudobutyrivibrio; s__xylanivorans
1322	1	0	0	0	0	k__Bacteria; p__Firmicutes; c__Clostridia; o__Eubacteriales; f__Lachnospiraceae; g__Blautia; s__hansenii
2488810	2	0	1	0	0	k__Bacteria; p__Firmicutes; c__Clostridia; o__Eubacteriales; f__Oscillospiraceae; g__Ruminiclostridium; s__herbifermentans
1160721	1	0	0	0	0	k__Bacteria; p__Firmicutes; c__Clostridia; o__Eubacteriales; f__Oscillospiraceae; g__Ruminococcus; s__bicirculans
2564099	1	0	0	0	0	k__Bacteria; p__Firmicutes; c__Clostridia; o__Eubacteriales; f__Oscillospiraceae; g__Ruminococcus; s__sp. JE7A12
55583	1	0	1	0	0	k__Bacteria; p__Firmicutes; c__Clostridia; o__Eubacteriales; f__Peptococcaceae; g__Dehalobacter; s__restrictus
58138	1	0	0	0	0	k__Bacteria; p__Firmicutes; c__Clostridia; o__Eubacteriales; f__Peptococcaceae; g__Desulfofarcimen; s__acetoxidans
1712410	1	0	0	0	0	k__Bacteria; p__Firmicutes; c__Clostridia; o__Eubacteriales; f__Peptococcaceae; g__Thermoanaerosceptrum; s__fracticalcis
2184575	1	0	0	0	0	k__Bacteria; p__Firmicutes; c__Clostridia; o__Eubacteriales; f__Eubacteriaceae; g__Acetobacterium; s__sp. KB-1
863	1	0	0	0	0	k__Bacteria; p__Firmicutes; c__Clostridia; o__Eubacteriales; f__Syntrophomonadaceae; g__Syntrophomonas; s__wolfei
86170	1	0	0	0	0	k__Bacteria; p__Firmicutes; c__Clostridia; o__Eubacteriales; f__Syntrophomonadaceae; g__Syntrophothermus; s__lipocalidus
717609	2	0	0	0	0	k__Bacteria; p__Firmicutes; c__Clostridia; o__Thermoanaerobacterales; f__Thermoanaerobacterales Family III. Incertae Sedis; g__Caldicellulosiruptor; s__obsidiansis
1222016	1	0	0	0	0	k__Bacteria; p__Firmicutes; c__Clostridia; o__Thermoanaerobacterales; f__Thermoanaerobacterales Family III. Incertae Sedis; g__Caldicellulosiruptor; s__changbaiensis
2806205	1	0	0	0	0	k__Bacteria; p__Firmicutes; c__Clostridia; o__Thermoanaerobacterales; f__Thermoanaerobacterales Family III. Incertae Sedis; g__Caldicellulosiruptor; s__sp. YA01
1517	1	0	1	0	0	k__Bacteria; p__Firmicutes; c__Clostridia; o__Thermoanaerobacterales; f__Thermoanaerobacterales Family III. Incertae Sedis; g__Thermoanaerobacterium; s__thermosaccharolyticum
2325	1	0	0	0	0	k__Bacteria; p__Firmicutes; c__Clostridia; o__Thermoanaerobacterales; f__Thermoanaerobacteraceae; g__Thermoanaerobacter; s__kivui
46354	1	0	0	0	0	k__Bacteria; p__Firmicutes; c__Clostridia; o__Thermoanaerobacterales; f__Thermoanaerobacteraceae; g__Thermoanaerobacter; s__wiegelii
28187	1	0	2	0	0	k__Bacteria; p__Firmicutes; c__Clostridia; o__Halanaerobiales; f__Halobacteroidaceae; g__Acetohalobium; s__arabaticum
42422	1	0	1	0	0	k__Bacteria; p__Firmicutes; c__Clostridia; o__Halanaerobiales; f__Halobacteroidaceae; g__Halobacteroides; s__halobius
2316383	1	0	0	0	0	k__Bacteria; p__Firmicutes; c__Clostridia; o__Thermosediminibacterales; f__Tepidanaerobacteraceae; g__Biomaibacter; s__acetigenes
1648	1	0	0	0	0	k__Bacteria; p__Firmicutes; c__Erysipelotrichia; o__Erysipelotrichales; f__Erysipelotrichaceae; g__Erysipelothrix; s__rhusiopathiae
2806552	1	0	0	0	0	k__Bacteria; p__Firmicutes; c__Erysipelotrichia; o__Erysipelotrichales; f__Erysipelotrichaceae; g__Bulleidia; s__sp. zg-1006
2583452	1	0	1	0	0	k__Bacteria; p__Firmicutes; c__Erysipelotrichia; o__Erysipelotrichales; f__Erysipelotrichaceae; g__Amedibacterium; s__intestinale
154288	1	0	2	0	0	k__Bacteria; p__Firmicutes; c__Erysipelotrichia; o__Erysipelotrichales; f__Turicibacteraceae; g__Turicibacter; s__sanguinis
1287640	2	0	1	0	0	k__Bacteria; p__Firmicutes; c__Tissierellia; o__Tissierellales; f__Peptoniphilaceae; g__Anaerococcus; s__obesiensis
1870984	1	0	0	0	0	k__Bacteria; p__Firmicutes; c__Tissierellia; o__Tissierellales; f__Peptoniphilaceae; g__Anaerococcus; s__mediterraneensis
1278232	1	0	1	0	0	k__Bacteria; p__Firmicutes; c__Tissierellia; o__Tissierellales; f__Tissierellaceae; g__Keratinibaculum; s__paraultunense
1556	1	0	0	0	0	k__Bacteria; p__Firmicutes; c__Tissierellia; o__Tissierellales; f__Gottschalkiaceae; g__Gottschalkia; s__acidurici
484770	2	0	0	0	0	k__Bacteria; p__Firmicutes; c__Negativicutes; o__Selenomonadales; f__Sporomusaceae; g__Pelosinus; s__sp. UFO1
248315	1	0	0	0	0	k__Bacteria; p__Firmicutes; c__Negativicutes; o__Veillonellales; f__Veillonellaceae; g__Veillonella; s__rodentium
33025	1	0	0	0	0	k__Bacteria; p__Firmicutes; c__Negativicutes; o__Acidaminococcales; f__Acidaminococcaceae; g__Phascolarctobacterium; s__faecium
57493	2	0	0	0	0	k__Bacteria; p__Actinobacteria; c__Actinomycetia; o__Micrococcales; f__Micrococcaceae; g__Kocuria; s__
1883	2	0	2	0	0	k__Bacteria; p__Actinobacteria; c__Actinomycetia; o__Streptomycetales; f__Streptomycetaceae; g__Streptomyces; s__
2750025	1	0	0	0	0	k__Bacteria; p__Actinobacteria; c__Actinomycetia; o__Streptomycetales; f__Streptomycetaceae; g__Streptomyces; s__sp. CB00271
379067	1	0	0	0	0	k__Bacteria; p__Actinobacteria; c__Actinomycetia; o__Streptomycetales; f__Streptomycetaceae; g__Streptomyces; s__bingchenggensis
38290	1	0	1	0	0	k__Bacteria; p__Actinobacteria; c__Actinomycetia; o__Corynebacteriales; f__Corynebacteriaceae; g__Corynebacterium; s__macginleyi
2701	1	0	0	0	0	k__Bacteria; p__Actinobacteria; c__Actinomycetia; o__Bifidobacteriales; f__Bifidobacteriaceae; g__Gardnerella; s__
2702	1	0	0	0	0	k__Bacteria; p__Actinobacteria; c__Actinomycetia; o__Bifidobacteriales; f__Bifidobacteriaceae; g__Gardnerella; s__vaginalis
675090	1	0	0	0	0	k__Bacteria; p__Actinobacteria; c__Actinomycetia; o__Actinomycetales; f__Actinomycetaceae; g__Actinomyces; s__weissii
106370	1	0	0	0	0	k__Bacteria; p__Actinobacteria; c__Actinomycetia; o__Frankiales; f__Frankiaceae; g__Frankia; s__casuarinae
2653852	1	0	0	0	0	k__Bacteria; p__Actinobacteria; c__Rubrobacteria; o__Rubrobacterales; f__Rubrobacteraceae; g__Rubrobacter; s__sp. SCSIO 52915
2092	2	0	0	0	0	k__Bacteria; p__Tenericutes; c__Mollicutes; o__Mycoplasmatales; f__Mycoplasmataceae; g__; s__
754515	1	0	0	0	0	k__Bacteria; p__Tenericutes; c__Mollicutes; o__Mycoplasmatales; f__Mycoplasmataceae; g__Mycoplasma; s__sp. Mirounga ES2806-GEN
754516	1	0	0	0	0	k__Bacteria; p__Tenericutes; c__Mollicutes; o__Mycoplasmatales; f__Mycoplasmataceae; g__Mycoplasma; s__sp. Mirounga ES2806-NAS
2725994	1	0	1	0	0	k__Bacteria; p__Tenericutes; c__Mollicutes; o__Mycoplasmatales; f__Mycoplasmataceae; g__Mycoplasma; s__sp. 1654_15
519450	3	0	0	0	0	k__Bacteria; p__Tenericutes; c__Mollicutes; o__Mycoplasmatales; f__Mycoplasmataceae; g__Mycoplasma; s__anserisalpingitidis
142651	2	0	1	0	0	k__Bacteria; p__Tenericutes; c__Mollicutes; o__Mycoplasmatales; f__Mycoplasmataceae; g__Mycoplasma; s__phocidae
2118	2	0	0	0	0	k__Bacteria; p__Tenericutes; c__Mollicutes; o__Mycoplasmatales; f__Mycoplasmataceae; g__Mycoplasma; s__mobile
2116	1	0	0	0	0	k__Bacteria; p__Tenericutes; c__Mollicutes; o__Mycoplasmatales; f__Mycoplasmataceae; g__Mycoplasma; s__iowae
1612150	1	0	0	0	0	k__Bacteria; p__Tenericutes; c__Mollicutes; o__Mycoplasmatales; f__Mycoplasmataceae; g__Mycoplasma; s__tullyi
86660	1	0	0	0	0	k__Bacteria; p__Tenericutes; c__Mollicutes; o__Mycoplasmatales; f__Mycoplasmataceae; g__Mycoplasma; s__dispar
2099	1	0	0	0	0	k__Bacteria; p__Tenericutes; c__Mollicutes; o__Mycoplasmatales; f__Mycoplasmataceae; g__Mycoplasma; s__hyopneumoniae
2128	1	0	0	0	0	k__Bacteria; p__Tenericutes; c__Mollicutes; o__Mycoplasmatales; f__Mycoplasmataceae; g__Mycoplasma; s__flocculare
28227	1	0	0	0	0	k__Bacteria; p__Tenericutes; c__Mollicutes; o__Mycoplasmatales; f__Mycoplasmataceae; g__Mycoplasma; s__penetrans
2098	1	0	1	0	0	k__Bacteria; p__Tenericutes; c__Mollicutes; o__Mycoplasmatales; f__Mycoplasmataceae; g__Mycoplasma; s__hominis
142649	1	0	0	0	0	k__Bacteria; p__Tenericutes; c__Mollicutes; o__Mycoplasmatales; f__Mycoplasmataceae; g__Mycoplasma; s__phocicerebrale
2107	1	0	0	0	0	k__Bacteria; p__Tenericutes; c__Mollicutes; o__Mycoplasmatales; f__Mycoplasmataceae; g__Mycoplasmopsis; s__Mycoplasma pulmonis
76629	1	0	0	0	0	k__Bacteria; p__Tenericutes; c__Mollicutes; o__Mycoplasmatales; f__Mycoplasmataceae; g__Mycoplasmopsis; s__Mycoplasma gallopavonis
33923	1	0	1	0	0	k__Bacteria; p__Tenericutes; c__Mollicutes; o__Mycoplasmatales; f__Mycoplasmataceae; g__Mycoplasmopsis; s__Mycoplasma felis
29556	1	0	0	0	0	k__Bacteria; p__Tenericutes; c__Mollicutes; o__Mycoplasmatales; f__Mycoplasmataceae; g__Mycoplasmopsis; s__Mycoplasma gallinaceum
2112	1	0	1	0	0	k__Bacteria; p__Tenericutes; c__Mollicutes; o__Mycoplasmatales; f__Mycoplasmataceae; g__Mycoplasmopsis; s__Mycoplasma bovigenitalium
2134	1	0	0	0	0	k__Bacteria; p__Tenericutes; c__Mollicutes; o__Entomoplasmatales; f__Spiroplasmataceae; g__Spiroplasma; s__melliferum
216946	1	0	1	0	0	k__Bacteria; p__Tenericutes; c__Mollicutes; o__Entomoplasmatales; f__Spiroplasmataceae; g__Spiroplasma; s__turonicum
216931	1	0	0	0	0	k__Bacteria; p__Tenericutes; c__Mollicutes; o__Entomoplasmatales; f__Spiroplasmataceae; g__Spiroplasma; s__alleghenense
2137	1	0	0	0	0	k__Bacteria; p__Tenericutes; c__Mollicutes; o__Entomoplasmatales; f__Spiroplasmataceae; g__Spiroplasma; s__apis
138853	1	0	1	0	0	k__Bacteria; p__Tenericutes; c__Mollicutes; o__Entomoplasmatales; f__Entomoplasmataceae; g__Mesoplasma; s__lactucae
59748	1	0	0	0	0	k__Bacteria; p__Tenericutes; c__Mollicutes; o__Acholeplasmatales; f__Acholeplasmataceae; g__Candidatus Phytoplasma; s__australiense
69896	1	0	0	0	0	k__Bacteria; p__Tenericutes; c__Mollicutes; o__Acholeplasmatales; f__Acholeplasmataceae; g__Candidatus Phytoplasma; s__solani
35773	1	0	0	0	0	k__Bacteria; p__Tenericutes; c__Mollicutes; o__Acholeplasmatales; f__Acholeplasmataceae; g__Candidatus Phytoplasma; s__luffae
2148	1	0	0	0	0	k__Bacteria; p__Tenericutes; c__Mollicutes; o__Acholeplasmatales; f__Acholeplasmataceae; g__Acholeplasma; s__laidlawii
264636	1	0	1	0	0	k__Bacteria; p__Tenericutes; c__Mollicutes; o__Acholeplasmatales; f__Acholeplasmataceae; g__Acholeplasma; s__hippikon
1299	1	0	0	0	0	k__Bacteria; p__Deinococcus-Thermus; c__Deinococci; o__Deinococcales; f__Deinococcaceae; g__Deinococcus; s__radiodurans
502394	1	0	0	0	0	k__Bacteria; p__Deinococcus-Thermus; c__Deinococci; o__Deinococcales; f__Deinococcaceae; g__Deinococcus; s__gobiensis
2675797	1	0	0	0	0	k__Bacteria; p__Proteobacteria; c__Gammaproteobacteria; o__Enterobacterales; f__Enterobacteriaceae; g__; s__Enterobacteriaceae endosymbiont of Plateumaris sericea
2675774	1	0	1	0	0	k__Bacteria; p__Proteobacteria; c__Gammaproteobacteria; o__Enterobacterales; f__Enterobacteriaceae; g__Enterobacter; s__aceae endosymbiont of Donacia cinerea
2675779	1	0	0	0	0	k__Bacteria; p__Proteobacteria; c__Gammaproteobacteria; o__Enterobacterales; f__Enterobacteriaceae; g__; s__Enterobacteriaceae endosymbiont of Donacia marginata
2675792	1	0	0	0	0	k__Bacteria; p__Proteobacteria; c__Gammaproteobacteria; o__Enterobacterales; f__Enterobacteriaceae; g__; s__Enterobacteriaceae endosymbiont of Neohaemonia nigricornis
2675790	1	0	0	0	0	k__Bacteria; p__Proteobacteria; c__Gammaproteobacteria; o__Enterobacterales; f__Enterobacteriaceae; g__; s__Enterobacteriaceae endosymbiont of Macroplea appendiculata
2675787	1	0	0	0	0	k__Bacteria; p__Proteobacteria; c__Gammaproteobacteria; o__Enterobacterales; f__Enterobacteriaceae; g__; s__Enterobacteriaceae endosymbiont of Donacia tomentosa
69218	1	0	0	0	0	k__Bacteria; p__Proteobacteria; c__Gammaproteobacteria; o__Enterobacterales; f__Enterobacteriaceae; g__Enterobacter; s__cancerogenus
570	1	0	0	0	0	k__Bacteria; p__Proteobacteria; c__Gammaproteobacteria; o__Enterobacterales; f__Enterobacteriaceae; g__Klebsiella; s__
244366	2	0	0	0	0	k__Bacteria; p__Proteobacteria; c__Gammaproteobacteria; o__Enterobacterales; f__Enterobacteriaceae; g__Klebsiella; s__variicola
1463165	1	0	0	0	0	k__Bacteria; p__Proteobacteria; c__Gammaproteobacteria; o__Enterobacterales; f__Enterobacteriaceae; g__Klebsiella; s__quasipneumoniae
1703250	1	0	0	0	0	k__Bacteria; p__Proteobacteria; c__Gammaproteobacteria; o__Enterobacterales; f__Enterobacteriaceae; g__Citrobacter; s__sp. CRE-46
1410383	2	0	0	0	0	k__Bacteria; p__Proteobacteria; c__Gammaproteobacteria; o__Enterobacterales; f__Enterobacteriaceae; g__Candidatus Tachikawaea; s__gelatinosa
2681986	1	0	1	0	0	k__Bacteria; p__Proteobacteria; c__Gammaproteobacteria; o__Enterobacterales; f__Enterobacteriaceae; g__Candidatus Blochmannia; s__Blochmannia endosymbiont of Camponotus nipponensis
1778264	1	0	0	0	0	k__Bacteria; p__Proteobacteria; c__Gammaproteobacteria; o__Enterobacterales; f__Enterobacteriaceae; g__Candidatus Mikella; s__endobia
590	1	0	0	0	0	k__Bacteria; p__Proteobacteria; c__Gammaproteobacteria; o__Enterobacterales; f__Enterobacteriaceae; g__Salmonella; s__
401619	1	0	0	0	0	k__Bacteria; p__Proteobacteria; c__Gammaproteobacteria; o__Enterobacterales; f__Enterobacteriaceae; g__Candidatus Riesia; s__pediculicola
53335	3	0	0	0	0	k__Bacteria; p__Proteobacteria; c__Gammaproteobacteria; o__Enterobacterales; f__Erwiniaceae; g__Pantoea; s__
59814	3	0	0	0	0	k__Bacteria; p__Proteobacteria; c__Gammaproteobacteria; o__Enterobacterales; f__Erwiniaceae; g__Pantoea; s__dispersa
1891675	1	0	0	0	0	k__Bacteria; p__Proteobacteria; c__Gammaproteobacteria; o__Enterobacterales; f__Erwiniaceae; g__Pantoea; s__alhagi
2487345	1	0	0	0	0	k__Bacteria; p__Proteobacteria; c__Gammaproteobacteria; o__Enterobacterales; f__Erwiniaceae; g__Tatumella; s__sp. TA1
583	4	0	2	0	0	k__Bacteria; p__Proteobacteria; c__Gammaproteobacteria; o__Enterobacterales; f__Morganellaceae; g__Proteus; s__
587	1	0	1	0	0	k__Bacteria; p__Proteobacteria; c__Gammaproteobacteria; o__Enterobacterales; f__Morganellaceae; g__Providencia; s__rettgeri
628	1	0	0	0	0	k__Bacteria; p__Proteobacteria; c__Gammaproteobacteria; o__Enterobacterales; f__Morganellaceae; g__Xenorhabdus; s__nematophila
28151	1	0	0	0	0	k__Bacteria; p__Proteobacteria; c__Gammaproteobacteria; o__Enterobacterales; f__Yersiniaceae; g__Serratia; s__proteamaculans
61652	1	0	0	0	0	k__Bacteria; p__Proteobacteria; c__Gammaproteobacteria; o__Enterobacterales; f__Yersiniaceae; g__Serratia; s__rubidaea
29485	1	0	1	0	0	k__Bacteria; p__Proteobacteria; c__Gammaproteobacteria; o__Enterobacterales; f__Yersiniaceae; g__Yersinia; s__rohdei
2042057	1	0	0	0	0	k__Bacteria; p__Proteobacteria; c__Gammaproteobacteria; o__Enterobacterales; f__Pectobacteriaceae; g__Pectobacterium; s__polaris
1089444	1	0	0	0	0	k__Bacteria; p__Proteobacteria; c__Gammaproteobacteria; o__Enterobacterales; f__Pectobacteriaceae; g__Dickeya; s__solani
1929246	1	0	0	0	0	k__Bacteria; p__Proteobacteria; c__Gammaproteobacteria; o__Enterobacterales; f__Bruguierivoracaceae; g__Sodalis; s__endosymbiont of Henestaris halophilus
470	4	0	1	0	0	k__Bacteria; p__Proteobacteria; c__Gammaproteobacteria; o__Pseudomonadales; f__Moraxellaceae; g__Acinetobacter; s__baumannii
48296	1	0	1	0	0	k__Bacteria; p__Proteobacteria; c__Gammaproteobacteria; o__Pseudomonadales; f__Moraxellaceae; g__Acinetobacter; s__pittii
1530123	1	0	0	0	0	k__Bacteria; p__Proteobacteria; c__Gammaproteobacteria; o__Pseudomonadales; f__Moraxellaceae; g__Acinetobacter; s__seifertii
2601122	1	0	0	0	0	k__Bacteria; p__Proteobacteria; c__Gammaproteobacteria; o__Pseudomonadales; f__Moraxellaceae; g__Acinetobacter; s__sp. YH12138
2545797	1	0	0	0	0	k__Bacteria; p__Proteobacteria; c__Gammaproteobacteria; o__Pseudomonadales; f__Moraxellaceae; g__Acinetobacter; s__sp. FDAARGOS_724
1879049	1	0	0	0	0	k__Bacteria; p__Proteobacteria; c__Gammaproteobacteria; o__Pseudomonadales; f__Moraxellaceae; g__Acinetobacter; s__sp. WCHAc010034
106648	2	0	0	0	0	k__Bacteria; p__Proteobacteria; c__Gammaproteobacteria; o__Pseudomonadales; f__Moraxellaceae; g__Acinetobacter; s__bereziniae
70348	1	0	0	0	0	k__Bacteria; p__Proteobacteria; c__Gammaproteobacteria; o__Pseudomonadales; f__Moraxellaceae; g__Acinetobacter; s__dispersus
256326	1	0	0	0	0	k__Bacteria; p__Proteobacteria; c__Gammaproteobacteria; o__Pseudomonadales; f__Moraxellaceae; g__Psychrobacter; s__arenosus
330922	1	0	0	0	0	k__Bacteria; p__Proteobacteria; c__Gammaproteobacteria; o__Pseudomonadales; f__Moraxellaceae; g__Psychrobacter; s__cryohalolentis
237609	3	0	0	0	0	k__Bacteria; p__Proteobacteria; c__Gammaproteobacteria; o__Pseudomonadales; f__Pseudomonadaceae; g__Pseudomonas; s__alkylphenolica
219572	2	0	0	0	0	k__Bacteria; p__Proteobacteria; c__Gammaproteobacteria; o__Pseudomonadales; f__Pseudomonadaceae; g__Pseudomonas; s__antarctica
158627	1	0	0	0	0	k__Bacteria; p__Proteobacteria; c__Gammaproteobacteria; o__Pseudomonadales; f__Pseudomonadaceae; g__Pseudomonas; s__graminis
317	1	0	1	0	0	k__Bacteria; p__Proteobacteria; c__Gammaproteobacteria; o__Pseudomonadales; f__Pseudomonadaceae; g__Pseudomonas; s__syringae
294	1	0	2	0	0	k__Bacteria; p__Proteobacteria; c__Gammaproteobacteria; o__Pseudomonadales; f__Pseudomonadaceae; g__Pseudomonas; s__fluorescens
2583375	1	0	0	0	0	k__Bacteria; p__Proteobacteria; c__Gammaproteobacteria; o__Alteromonadales; f__Pseudoalteromonadaceae; g__Pseudoalteromonas; s__sp. 16-SW-7
28107	2	0	0	0	0	k__Bacteria; p__Proteobacteria; c__Gammaproteobacteria; o__Alteromonadales; f__Pseudoalteromonadaceae; g__Pseudoalteromonas; s__espejiana
166935	2	0	0	0	0	k__Bacteria; p__Proteobacteria; c__Gammaproteobacteria; o__Alteromonadales; f__Pseudoalteromonadaceae; g__Pseudoalteromonas; s__translucida
267375	1	0	0	0	0	k__Bacteria; p__Proteobacteria; c__Gammaproteobacteria; o__Alteromonadales; f__Pseudoalteromonadaceae; g__Pseudoalteromonas; s__marina
43658	1	0	0	0	0	k__Bacteria; p__Proteobacteria; c__Gammaproteobacteria; o__Alteromonadales; f__Pseudoalteromonadaceae; g__Pseudoalteromonas; s__rubra
43662	1	0	0	0	0	k__Bacteria; p__Proteobacteria; c__Gammaproteobacteria; o__Alteromonadales; f__Pseudoalteromonadaceae; g__Pseudoalteromonas; s__piscicida
2806008	2	0	0	0	0	k__Bacteria; p__Proteobacteria; c__Gammaproteobacteria; o__Alteromonadales; f__Shewanellaceae; g__Shewanella; s__sp. LZH-2
70863	3	0	0	0	0	k__Bacteria; p__Proteobacteria; c__Gammaproteobacteria; o__Alteromonadales; f__Shewanellaceae; g__Shewanella; s__oneidensis
271097	1	0	0	0	0	k__Bacteria; p__Proteobacteria; c__Gammaproteobacteria; o__Alteromonadales; f__Shewanellaceae; g__Shewanella; s__sediminis
150120	1	0	0	0	0	k__Bacteria; p__Proteobacteria; c__Gammaproteobacteria; o__Alteromonadales; f__Shewanellaceae; g__Shewanella; s__livingstonensis
72275	1	0	0	0	0	k__Bacteria; p__Proteobacteria; c__Gammaproteobacteria; o__Alteromonadales; f__Alteromonadaceae; g__; s__
226	1	0	0	0	0	k__Bacteria; p__Proteobacteria; c__Gammaproteobacteria; o__Alteromonadales; f__Alteromonadaceae; g__Alteromonas; s__
2267264	2	0	0	0	0	k__Bacteria; p__Proteobacteria; c__Gammaproteobacteria; o__Alteromonadales; f__Alteromonadaceae; g__Alteromonas; s__sp. RKMC-009
589873	1	0	0	0	0	k__Bacteria; p__Proteobacteria; c__Gammaproteobacteria; o__Alteromonadales; f__Alteromonadaceae; g__Alteromonas; s__australica
2172099	1	0	1	0	0	k__Bacteria; p__Proteobacteria; c__Gammaproteobacteria; o__Alteromonadales; f__Alteromonadaceae; g__Catenovulum; s__sp. CCB-QB4
1816219	1	0	0	0	0	k__Bacteria; p__Proteobacteria; c__Gammaproteobacteria; o__Alteromonadales; f__Colwelliaceae; g__Colwellia; s__sp. PAMC 21821
680	2	0	0	0	0	k__Bacteria; p__Proteobacteria; c__Gammaproteobacteria; o__Vibrionales; f__Vibrionaceae; g__Vibrio; s__campbellii
669	1	0	2	0	0	k__Bacteria; p__Proteobacteria; c__Gammaproteobacteria; o__Vibrionales; f__Vibrionaceae; g__Vibrio; s__harveyi
2662262	2	0	0	0	0	k__Bacteria; p__Proteobacteria; c__Gammaproteobacteria; o__Vibrionales; f__Vibrionaceae; g__Vibrio; s__sp. SM1977
55601	2	0	1	0	0	k__Bacteria; p__Proteobacteria; c__Gammaproteobacteria; o__Vibrionales; f__Vibrionaceae; g__Vibrio; s__anguillarum
666	2	0	4	0	0	k__Bacteria; p__Proteobacteria; c__Gammaproteobacteria; o__Vibrionales; f__Vibrionaceae; g__Vibrio; s__cholerae
689	1	0	0	0	0	k__Bacteria; p__Proteobacteria; c__Gammaproteobacteria; o__Vibrionales; f__Vibrionaceae; g__Vibrio; s__mediterranei
28172	1	0	0	0	0	k__Bacteria; p__Proteobacteria; c__Gammaproteobacteria; o__Vibrionales; f__Vibrionaceae; g__Vibrio; s__metschnikovii
40269	1	0	0	0	0	k__Bacteria; p__Proteobacteria; c__Gammaproteobacteria; o__Vibrionales; f__Vibrionaceae; g__Aliivibrio; s__salmonicida
1908198	1	0	0	0	0	k__Bacteria; p__Proteobacteria; c__Gammaproteobacteria; o__Vibrionales; f__Vibrionaceae; g__Salinivibrio; s__kushneri
1737490	1	0	0	0	0	k__Bacteria; p__Proteobacteria; c__Gammaproteobacteria; o__Cellvibrionales; f__Cellvibrionaceae; g__Agarilytica; s__rhodophyticola
359370	1	0	0	0	0	k__Bacteria; p__Proteobacteria; c__Gammaproteobacteria; o__Cellvibrionales; f__Microbulbiferaceae; g__Microbulbifer; s__sp. A4B17
1516059	1	0	0	0	0	k__Bacteria; p__Proteobacteria; c__Gammaproteobacteria; o__Cellvibrionales; f__Microbulbiferaceae; g__Microbulbifer; s__sp. ALW1
727	2	0	0	0	0	k__Bacteria; p__Proteobacteria; c__Gammaproteobacteria; o__Pasteurellales; f__Pasteurellaceae; g__Haemophilus; s__influenzae
712310	1	0	0	0	0	k__Bacteria; p__Proteobacteria; c__Gammaproteobacteria; o__Pasteurellales; f__Pasteurellaceae; g__Haemophilus; s__sp. oral taxon 036
747	2	0	3	0	0	k__Bacteria; p__Proteobacteria; c__Gammaproteobacteria; o__Pasteurellales; f__Pasteurellaceae; g__Pasteurella; s__multocida
1443036	1	0	0	0	0	k__Bacteria; p__Proteobacteria; c__Gammaproteobacteria; o__Pasteurellales; f__Pasteurellaceae; g__Vespertiliibacter; s__pulmonis
644	1	0	0	0	0	k__Bacteria; p__Proteobacteria; c__Gammaproteobacteria; o__Aeromonadales; f__Aeromonadaceae; g__Aeromonas; s__hydrophila
263	1	0	1	0	0	k__Bacteria; p__Proteobacteria; c__Gammaproteobacteria; o__Thiotrichales; f__Francisellaceae; g__Francisella; s__tularensis
657445	1	0	0	0	0	k__Bacteria; p__Proteobacteria; c__Gammaproteobacteria; o__Thiotrichales; f__Francisellaceae; g__Francisella; s__noatunensis
1547445	1	0	0	0	0	k__Bacteria; p__Proteobacteria; c__Gammaproteobacteria; o__Thiotrichales; f__Francisellaceae; g__Francisella; s__sp. FSC1006
2746060	2	0	0	0	0	k__Bacteria; p__Proteobacteria; c__Gammaproteobacteria; o__Legionellales; f__Legionellaceae; g__Legionella; s__sp. PC1000
2005262	1	0	0	0	0	k__Bacteria; p__Proteobacteria; c__Gammaproteobacteria; o__Legionellales; f__Legionellaceae; g__Legionella; s__endosymbiont of Polyplax serrata
28082	1	0	0	0	0	k__Bacteria; p__Proteobacteria; c__Gammaproteobacteria; o__Legionellales; f__Legionellaceae; g__Legionella; s__anisa
446	1	0	1	0	0	k__Bacteria; p__Proteobacteria; c__Gammaproteobacteria; o__Legionellales; f__Legionellaceae; g__Legionella; s__pneumophila
2054173	1	0	0	0	0	k__Bacteria; p__Proteobacteria; c__Gammaproteobacteria; o__Legionellales; f__Coxiellaceae; g__Coxiella; s__Candidatus Coxiella mudrowiae
135614	1	0	0	0	0	k__Bacteria; p__Proteobacteria; c__Gammaproteobacteria; o__Xanthomonadales; f__; g__; s__
48664	1	0	0	0	0	k__Bacteria; p__Proteobacteria; c__Gammaproteobacteria; o__Xanthomonadales; f__Xanthomonadaceae; g__Xanthomonas; s__fragariae
128785	1	0	0	0	0	k__Bacteria; p__Proteobacteria; c__Gammaproteobacteria; o__Xanthomonadales; f__Xanthomonadaceae; g__Pseudoxanthomonas; s__mexicana
2745	1	0	0	0	0	k__Bacteria; p__Proteobacteria; c__Gammaproteobacteria; o__Oceanospirillales; f__Halomonadaceae; g__Halomonas; s__
2562282	1	0	0	0	0	k__Bacteria; p__Proteobacteria; c__Gammaproteobacteria; o__Oceanospirillales; f__Halomonadaceae; g__Halomonas; s__sp. Y2R2
91844	1	0	1	0	0	k__Bacteria; p__Proteobacteria; c__Gammaproteobacteria; o__Oceanospirillales; f__Halomonadaceae; g__Candidatus Portiera; s__aleyrodidarum
48076	1	0	0	0	0	k__Bacteria; p__Proteobacteria; c__Gammaproteobacteria; o__Oceanospirillales; f__Oceanospirillaceae; g__Marinobacterium; s__georgiense
158327	1	0	0	0	0	k__Bacteria; p__Proteobacteria; c__Gammaproteobacteria; o__Oceanospirillales; f__Hahellaceae; g__Hahella; s__chejuensis
2545632	2	0	0	0	0	k__Bacteria; p__Proteobacteria; c__Gammaproteobacteria; o__Chromatiales; f__Chromatiaceae; g__Rheinheimera; s__sp. D18
2498451	1	0	0	0	0	k__Bacteria; p__Proteobacteria; c__Gammaproteobacteria; o__Chromatiales; f__Chromatiaceae; g__Rheinheimera; s__sp. LHK132
1765967	1	0	0	0	0	k__Bacteria; p__Proteobacteria; c__Gammaproteobacteria; o__Chromatiales; f__Ectothiorhodospiraceae; g__Acidihalobacter; s__ferrooxydans
2732590	1	0	0	0	0	k__Bacteria; p__Proteobacteria; c__Gammaproteobacteria; o__Chromatiales; f__Ectothiorhodospiraceae; g__Candidatus Vesicomyosocius; s__sp. SY067_SCS001
2508687	1	0	0	0	0	k__Bacteria; p__Proteobacteria; c__Gammaproteobacteria; o__Chromatiales; f__Ectothiorhodospiraceae; g__Candidatus Thioglobus; s__sp. NP1
1704499	1	0	1	0	0	k__Bacteria; p__Proteobacteria; c__Gammaproteobacteria; o__Methylococcales; f__Methylococcaceae; g__Methylovulum; s__psychrotolerans
1620215	1	0	0	0	0	k__Bacteria; p__Proteobacteria; c__Gammaproteobacteria; o__Acidiferrobacterales; f__Acidiferrobacteraceae; g__Sulfuricaulis; s__limicola
2714923	1	0	0	0	0	k__Bacteria; p__Proteobacteria; c__Betaproteobacteria; o__Burkholderiales; f__Comamonadaceae; g__Acidovorax; s__sp. HDW3
282217	1	0	0	0	0	k__Bacteria; p__Proteobacteria; c__Betaproteobacteria; o__Burkholderiales; f__Comamonadaceae; g__Variovorax; s__sp. SRS16
34073	1	0	0	0	0	k__Bacteria; p__Proteobacteria; c__Betaproteobacteria; o__Burkholderiales; f__Comamonadaceae; g__Variovorax; s__paradoxus
47420	1	0	0	0	0	k__Bacteria; p__Proteobacteria; c__Betaproteobacteria; o__Burkholderiales; f__Comamonadaceae; g__Hydrogenophaga; s__
47421	1	0	0	0	0	k__Bacteria; p__Proteobacteria; c__Betaproteobacteria; o__Burkholderiales; f__Comamonadaceae; g__Hydrogenophaga; s__pseudoflava
2184519	1	0	0	0	0	k__Bacteria; p__Proteobacteria; c__Betaproteobacteria; o__Burkholderiales; f__Comamonadaceae; g__Hydrogenophaga; s__sp. NH-16
2741720	1	0	0	0	0	k__Bacteria; p__Proteobacteria; c__Betaproteobacteria; o__Burkholderiales; f__Comamonadaceae; g__Rhodoferax; s__sp. BAB1
296591	1	0	0	0	0	k__Bacteria; p__Proteobacteria; c__Betaproteobacteria; o__Burkholderiales; f__Comamonadaceae; g__Polaromonas; s__sp. JS666
225991	1	0	1	0	0	k__Bacteria; p__Proteobacteria; c__Betaproteobacteria; o__Burkholderiales; f__Comamonadaceae; g__Comamonas; s__aquatica
1844971	1	0	0	0	0	k__Bacteria; p__Proteobacteria; c__Betaproteobacteria; o__Burkholderiales; f__Comamonadaceae; g__Curvibacter; s__sp. AEP1-3
2109915	1	0	0	0	0	k__Bacteria; p__Proteobacteria; c__Betaproteobacteria; o__Burkholderiales; f__Comamonadaceae; g__Simplicispira; s__suum
337	1	0	0	0	0	k__Bacteria; p__Proteobacteria; c__Betaproteobacteria; o__Burkholderiales; f__Burkholderiaceae; g__Burkholderia; s__glumae
576610	1	0	0	0	0	k__Bacteria; p__Proteobacteria; c__Betaproteobacteria; o__Burkholderiales; f__Burkholderiaceae; g__Polynucleobacter; s__necessarius
1835254	1	0	0	0	0	k__Bacteria; p__Proteobacteria; c__Betaproteobacteria; o__Burkholderiales; f__Burkholderiaceae; g__Polynucleobacter; s__duraquae
93221	1	0	0	0	0	k__Bacteria; p__Proteobacteria; c__Betaproteobacteria; o__Burkholderiales; f__Burkholderiaceae; g__Pandoraea; s__pulmonicola
2732163	1	0	0	0	0	k__Bacteria; p__Proteobacteria; c__Betaproteobacteria; o__Burkholderiales; f__Burkholderiaceae; g__Limnobacter; s__sp. SAORIC-580
1822464	1	0	0	0	0	k__Bacteria; p__Proteobacteria; c__Betaproteobacteria; o__Burkholderiales; f__Burkholderiaceae; g__Paraburkholderia; s__
34103	7	0	0	0	0	k__Bacteria; p__Proteobacteria; c__Betaproteobacteria; o__Burkholderiales; f__Burkholderiaceae; g__Sphaerotilus; s__natans
28068	1	0	0	0	0	k__Bacteria; p__Proteobacteria; c__Betaproteobacteria; o__Burkholderiales; f__Burkholderiaceae; g__Rubrivivax; s__gelatinosus
76731	1	0	0	0	0	k__Bacteria; p__Proteobacteria; c__Betaproteobacteria; o__Burkholderiales; f__Burkholderiaceae; g__Roseateles; s__depolymerans
1768242	1	0	0	0	0	k__Bacteria; p__Proteobacteria; c__Betaproteobacteria; o__Burkholderiales; f__Burkholderiaceae; g__Paucibacter; s__sp. KCTC 42545
75682	1	0	0	0	0	k__Bacteria; p__Proteobacteria; c__Betaproteobacteria; o__Burkholderiales; f__Oxalobacteraceae; g__; s__
341045	2	0	0	0	0	k__Bacteria; p__Proteobacteria; c__Betaproteobacteria; o__Burkholderiales; f__Oxalobacteraceae; g__Herbaspirillum; s__hiltneri
321983	1	0	0	0	0	k__Bacteria; p__Proteobacteria; c__Betaproteobacteria; o__Burkholderiales; f__Oxalobacteraceae; g__Massilia; s__albidiflava
2769491	1	0	0	0	0	k__Bacteria; p__Proteobacteria; c__Betaproteobacteria; o__Burkholderiales; f__Oxalobacteraceae; g__Massilia; s__sp. LPB0304
847	1	0	0	0	0	k__Bacteria; p__Proteobacteria; c__Betaproteobacteria; o__Burkholderiales; f__Oxalobacteraceae; g__Oxalobacter; s__formigenes
2808899	1	0	0	0	0	k__Bacteria; p__Proteobacteria; c__Betaproteobacteria; o__Burkholderiales; f__Oxalobacteraceae; g__Janthinobacterium; s__sp. PLB02
1353889	1	0	0	0	0	k__Bacteria; p__Proteobacteria; c__Betaproteobacteria; o__Burkholderiales; f__Alcaligenaceae; g__Achromobacter; s__pestifer
90244	1	0	0	0	0	k__Bacteria; p__Proteobacteria; c__Betaproteobacteria; o__Burkholderiales; f__Alcaligenaceae; g__Oligella; s__ureolytica
1581557	1	0	0	0	0	k__Bacteria; p__Proteobacteria; c__Betaproteobacteria; o__Nitrosomonadales; f__Methylophilaceae; g__Candidatus Methylopumilus; s__planktonicus
261292	2	0	0	0	0	k__Bacteria; p__Proteobacteria; c__Betaproteobacteria; o__Nitrosomonadales; f__Nitrosomonadaceae; g__Nitrosomonas; s__sp. Is79A3
1842540	1	0	0	0	0	k__Bacteria; p__Proteobacteria; c__Betaproteobacteria; o__Nitrosomonadales; f__Sterolibacteriaceae; g__Methyloversatilis; s__sp. RAC08
482	1	0	0	0	0	k__Bacteria; p__Proteobacteria; c__Betaproteobacteria; o__Neisseriales; f__Neisseriaceae; g__Neisseria; s__
487	1	0	0	0	0	k__Bacteria; p__Proteobacteria; c__Betaproteobacteria; o__Neisseriales; f__Neisseriaceae; g__Neisseria; s__meningitidis
28091	1	0	0	0	0	k__Bacteria; p__Proteobacteria; c__Betaproteobacteria; o__Neisseriales; f__Neisseriaceae; g__Neisseria; s__weaveri
194196	1	0	0	0	0	k__Bacteria; p__Proteobacteria; c__Betaproteobacteria; o__Neisseriales; f__Neisseriaceae; g__Alysiella; s__filiformis
1196083	1	0	0	0	0	k__Bacteria; p__Proteobacteria; c__Betaproteobacteria; o__Neisseriales; f__Neisseriaceae; g__Snodgrassella; s__alvi
33057	1	0	0	0	0	k__Bacteria; p__Proteobacteria; c__Betaproteobacteria; o__Rhodocyclales; f__Zoogloeaceae; g__Thauera; s__
1134435	1	0	0	0	0	k__Bacteria; p__Proteobacteria; c__Betaproteobacteria; o__Rhodocyclales; f__Zoogloeaceae; g__Thauera; s__humireducens
41294	1	0	0	0	0	k__Bacteria; p__Proteobacteria; c__Alphaproteobacteria; o__Hyphomicrobiales; f__Bradyrhizobiaceae; g__; s__
114615	1	0	0	0	0	k__Bacteria; p__Proteobacteria; c__Alphaproteobacteria; o__Hyphomicrobiales; f__Bradyrhizobiaceae; g__Bradyrhizobium; s__sp. ORS 278
2057741	1	0	0	0	0	k__Bacteria; p__Proteobacteria; c__Alphaproteobacteria; o__Hyphomicrobiales; f__Bradyrhizobiaceae; g__Bradyrhizobium; s__sp. SK17
1404864	1	0	0	0	0	k__Bacteria; p__Proteobacteria; c__Alphaproteobacteria; o__Hyphomicrobiales; f__Bradyrhizobiaceae; g__Bradyrhizobium; s__cosmicum
943830	1	0	0	0	0	k__Bacteria; p__Proteobacteria; c__Alphaproteobacteria; o__Hyphomicrobiales; f__Bradyrhizobiaceae; g__Tardiphaga; s__robiniae
1138189	1	0	0	0	0	k__Bacteria; p__Proteobacteria; c__Alphaproteobacteria; o__Hyphomicrobiales; f__Rhizobiaceae; g__Rhizobium; s__bangladeshense
379684	1	0	0	0	0	k__Bacteria; p__Proteobacteria; c__Alphaproteobacteria; o__Hyphomicrobiales; f__Rhizobiaceae; g__Rhizobium; s__pseudoryzae
358	1	0	1	0	0	k__Bacteria; p__Proteobacteria; c__Alphaproteobacteria; o__Hyphomicrobiales; f__Rhizobiaceae; g__Agrobacterium; s__tumefaciens
773	1	0	0	0	0	k__Bacteria; p__Proteobacteria; c__Alphaproteobacteria; o__Hyphomicrobiales; f__Bartonellaceae; g__Bartonella; s__
2759660	1	0	0	0	0	k__Bacteria; p__Proteobacteria; c__Alphaproteobacteria; o__Hyphomicrobiales; f__Bartonellaceae; g__Bartonella; s__sp. HY038
33047	1	0	0	0	0	k__Bacteria; p__Proteobacteria; c__Alphaproteobacteria; o__Hyphomicrobiales; f__Bartonellaceae; g__Bartonella; s__vinsonii
56426	1	0	0	0	0	k__Bacteria; p__Proteobacteria; c__Alphaproteobacteria; o__Hyphomicrobiales; f__Bartonellaceae; g__Bartonella; s__clarridgeiae
85701	1	0	0	0	0	k__Bacteria; p__Proteobacteria; c__Alphaproteobacteria; o__Hyphomicrobiales; f__Bartonellaceae; g__Bartonella; s__tribocorum
2744521	1	0	0	0	0	k__Bacteria; p__Proteobacteria; c__Alphaproteobacteria; o__Hyphomicrobiales; f__Phyllobacteriaceae; g__Mesorhizobium; s__sp. L-2-11
1756988	1	0	0	0	0	k__Bacteria; p__Proteobacteria; c__Alphaproteobacteria; o__Hyphomicrobiales; f__Phyllobacteriaceae; g__Nitratireductor; s__sp. OM-1
244596	1	0	0	0	0	k__Bacteria; p__Proteobacteria; c__Alphaproteobacteria; o__Hyphomicrobiales; f__Phyllobacteriaceae; g__Hoeflea; s__phototrophica
271865	1	0	0	0	0	k__Bacteria; p__Proteobacteria; c__Alphaproteobacteria; o__Hyphomicrobiales; f__Brucellaceae; g__Brucella; s__[Ochrobactrum] quorumnocens
1673076	2	0	0	0	0	k__Bacteria; p__Proteobacteria; c__Alphaproteobacteria; o__Sphingomonadales; f__Sphingomonadaceae; g__Sphingobium; s__hydrophobicum
2733867	1	0	0	0	0	k__Bacteria; p__Proteobacteria; c__Alphaproteobacteria; o__Sphingomonadales; f__Sphingomonadaceae; g__Sphingobium; s__sp. KCTC 72723
1609977	2	0	0	0	0	k__Bacteria; p__Proteobacteria; c__Alphaproteobacteria; o__Sphingomonadales; f__Sphingomonadaceae; g__Sphingomonas; s__hengshuiensis
2735134	1	0	0	0	0	k__Bacteria; p__Proteobacteria; c__Alphaproteobacteria; o__Sphingomonadales; f__Sphingomonadaceae; g__Sphingomonas; s__sp. AP4-R1
434	1	0	0	0	0	k__Bacteria; p__Proteobacteria; c__Alphaproteobacteria; o__Rhodospirillales; f__Acetobacteraceae; g__Acetobacter; s__
435	2	0	0	0	0	k__Bacteria; p__Proteobacteria; c__Alphaproteobacteria; o__Rhodospirillales; f__Acetobacteraceae; g__Acetobacter; s__aceti
104102	1	0	0	0	0	k__Bacteria; p__Proteobacteria; c__Alphaproteobacteria; o__Rhodospirillales; f__Acetobacteraceae; g__Acetobacter; s__tropicalis
2762277	1	0	0	0	0	k__Bacteria; p__Proteobacteria; c__Alphaproteobacteria; o__Rhodospirillales; f__Acetobacteraceae; g__Entomobacter; s__blattae
442	1	0	0	0	0	k__Bacteria; p__Proteobacteria; c__Alphaproteobacteria; o__Rhodospirillales; f__Acetobacteraceae; g__Gluconobacter; s__oxydans
2594003	1	0	0	0	0	k__Bacteria; p__Proteobacteria; c__Alphaproteobacteria; o__Rhodospirillales; f__Rhodospirillaceae; g__Ferrovibrio; s__terrae
1549855	1	0	0	0	0	k__Bacteria; p__Proteobacteria; c__Alphaproteobacteria; o__Rhodospirillales; f__Rhodospirillaceae; g__Haematospirillum; s__jordaniae
31989	1	0	0	0	0	k__Bacteria; p__Proteobacteria; c__Alphaproteobacteria; o__Rhodobacterales; f__Rhodobacteraceae; g__; s__
1397108	1	0	0	0	0	k__Bacteria; p__Proteobacteria; c__Alphaproteobacteria; o__Rhodobacterales; f__Rhodobacteraceae; g__Celeribacter; s__marinus
2560053	1	0	0	0	0	k__Bacteria; p__Proteobacteria; c__Alphaproteobacteria; o__Rhodobacterales; f__Rhodobacteraceae; g__Paracoccus; s__liaowanqingii
1915078	1	0	0	0	0	k__Bacteria; p__Proteobacteria; c__Alphaproteobacteria; o__Rhodobacterales; f__Rhodobacteraceae; g__Thioclava; s__nitratireducens
2587855	1	0	0	0	0	k__Bacteria; p__Proteobacteria; c__Alphaproteobacteria; o__Rhodobacterales; f__Rhodobacteraceae; g__Sulfitobacter; s__sp. THAF37
215743	1	0	0	0	0	k__Bacteria; p__Proteobacteria; c__Alphaproteobacteria; o__Rhodobacterales; f__Rhodobacteraceae; g__Roseovarius; s__mucosus
2587852	1	0	1	0	0	k__Bacteria; p__Proteobacteria; c__Alphaproteobacteria; o__Rhodobacterales; f__Rhodobacteraceae; g__Roseivivax; s__sp. THAF30
33990	1	0	1	0	0	k__Bacteria; p__Proteobacteria; c__Alphaproteobacteria; o__Rickettsiales; f__Rickettsiaceae; g__Rickettsia; s__bellii
2601646	1	0	0	0	0	k__Bacteria; p__Proteobacteria; c__Alphaproteobacteria; o__Rickettsiales; f__Rickettsiaceae; g__Candidatus Sneabacter; s__namystus
945	1	0	0	0	0	k__Bacteria; p__Proteobacteria; c__Alphaproteobacteria; o__Rickettsiales; f__Anaplasmataceae; g__Ehrlichia; s__chaffeensis
2486578	1	0	0	0	0	k__Bacteria; p__Proteobacteria; c__Alphaproteobacteria; o__Rickettsiales; f__Anaplasmataceae; g__Ehrlichia; s__Rickettsiales endosymbiont of Stachyamoeba lipophora
1388755	1	0	0	0	0	k__Bacteria; p__Proteobacteria; c__Alphaproteobacteria; o__Pelagibacterales; f__Pelagibacteraceae; g__Candidatus Pelagibacter; s__sp. HIMB1321
1977864	1	0	0	0	0	k__Bacteria; p__Proteobacteria; c__Alphaproteobacteria; o__Pelagibacterales; f__Pelagibacteraceae; g__Candidatus Pelagibacter; s__sp. RS39
1977865	1	0	0	0	0	k__Bacteria; p__Proteobacteria; c__Alphaproteobacteria; o__Pelagibacterales; f__Pelagibacteraceae; g__Candidatus Pelagibacter; s__sp. RS40
1434191	1	0	0	0	0	k__Bacteria; p__Proteobacteria; c__Alphaproteobacteria; o__Maricaulales; f__Maricaulaceae; g__Glycocaulis; s__alkaliphilus
91604	1	0	0	0	0	k__Bacteria; p__Proteobacteria; c__Alphaproteobacteria; o__Holosporales; f__Candidatus Paracaedibacteraceae; g__Candidatus Paracaedibacter; s__acanthamoebae
2582913	1	0	0	0	0	k__Bacteria; p__Proteobacteria; c__Alphaproteobacteria; o__Emcibacterales; f__Emcibacteraceae; g__Luteithermobacter; s__gelatinilyticus
2321111	1	0	1	0	0	k__Bacteria; p__Proteobacteria; c__Epsilonproteobacteria; o__Campylobacterales; f__Campylobacteraceae; g__Aliarcobacter; s__
544718	1	0	1	0	0	k__Bacteria; p__Proteobacteria; c__Epsilonproteobacteria; o__Campylobacterales; f__Campylobacteraceae; g__Aliarcobacter; s__thereius
1355374	1	0	2	0	0	k__Bacteria; p__Proteobacteria; c__Epsilonproteobacteria; o__Campylobacterales; f__Campylobacteraceae; g__Aliarcobacter; s__lanthieri
873191	1	0	0	0	0	k__Bacteria; p__Proteobacteria; c__Epsilonproteobacteria; o__Campylobacterales; f__Campylobacteraceae; g__Arcobacter; s__defluvii
1054033	1	0	2	0	0	k__Bacteria; p__Proteobacteria; c__Epsilonproteobacteria; o__Campylobacterales; f__Campylobacteraceae; g__Arcobacter; s__venerupis
1315211	1	0	1	0	0	k__Bacteria; p__Proteobacteria; c__Epsilonproteobacteria; o__Campylobacterales; f__Campylobacteraceae; g__Arcobacter; s__aquimarinus
2593672	1	0	0	0	0	k__Bacteria; p__Proteobacteria; c__Epsilonproteobacteria; o__Campylobacterales; f__Campylobacteraceae; g__Arcobacter; s__sp. FWKO B
1849015	2	0	2	0	0	k__Bacteria; p__Proteobacteria; c__Epsilonproteobacteria; o__Campylobacterales; f__Campylobacteraceae; g__Pseudoarcobacter; s__acticola
1850254	1	0	1	0	0	k__Bacteria; p__Proteobacteria; c__Epsilonproteobacteria; o__Campylobacterales; f__Campylobacteraceae; g__Poseidonibacter; s__parvus
1904463	1	0	2	0	0	k__Bacteria; p__Proteobacteria; c__Epsilonproteobacteria; o__Campylobacterales; f__Campylobacteraceae; g__Poseidonibacter; s__lekithochrous
198	2	0	0	0	0	k__Bacteria; p__Proteobacteria; c__Epsilonproteobacteria; o__Campylobacterales; f__Campylobacteraceae; g__Campylobacter; s__hyointestinalis
1448857	2	0	0	0	0	k__Bacteria; p__Proteobacteria; c__Epsilonproteobacteria; o__Campylobacterales; f__Campylobacteraceae; g__Campylobacter; s__corcagiensis
206	1	0	0	0	0	k__Bacteria; p__Proteobacteria; c__Epsilonproteobacteria; o__Campylobacterales; f__Campylobacteraceae; g__Campylobacter; s__sputorum
488546	1	0	0	0	0	k__Bacteria; p__Proteobacteria; c__Epsilonproteobacteria; o__Campylobacterales; f__Campylobacteraceae; g__Campylobacter; s__peloridis
204	1	0	0	0	0	k__Bacteria; p__Proteobacteria; c__Epsilonproteobacteria; o__Campylobacterales; f__Campylobacteraceae; g__Campylobacter; s__showae
213	1	0	0	0	0	k__Bacteria; p__Proteobacteria; c__Epsilonproteobacteria; o__Campylobacterales; f__Helicobacteraceae; g__Helicobacter; s__cinaedi
217	1	0	0	0	0	k__Bacteria; p__Proteobacteria; c__Epsilonproteobacteria; o__Campylobacterales; f__Helicobacteraceae; g__Helicobacter; s__mustelae
2579250	1	0	1	0	0	k__Bacteria; p__Proteobacteria; c__Epsilonproteobacteria; o__Nautiliales; f__Nautiliaceae; g__Nautilia; s__sp. PV-1
2706014	1	0	0	0	0	k__Bacteria; p__Proteobacteria; c__Epsilonproteobacteria; o__Nautiliales; f__Nitratiruptoraceae; g__Nitratiruptor; s__labii
35	1	0	0	0	0	k__Bacteria; p__Proteobacteria; c__Deltaproteobacteria; o__Myxococcales; f__Myxococcaceae; g__Corallococcus; s__macrosporus
80816	1	0	0	0	0	k__Bacteria; p__Proteobacteria; c__Deltaproteobacteria; o__Myxococcales; f__Kofleriaceae; g__Haliangium; s__ochraceum
29546	1	0	0	0	0	k__Bacteria; p__Proteobacteria; c__Deltaproteobacteria; o__Desulfovibrionales; f__Desulfovibrionaceae; g__Lawsonia; s__intracellularis
1716143	1	0	0	0	0	k__Bacteria; p__Proteobacteria; c__Deltaproteobacteria; o__Desulfovibrionales; f__Desulfovibrionaceae; g__Pseudodesulfovibrio; s__indicus
35554	1	0	0	0	0	k__Bacteria; p__Proteobacteria; c__Deltaproteobacteria; o__Desulfuromonadales; f__Geobacteraceae; g__Geobacter; s__sulfurreducens
2291	1	0	0	0	0	k__Bacteria; p__Proteobacteria; c__Deltaproteobacteria; o__Desulfobacterales; f__Desulfobacteraceae; g__Desulfobacter; s__hydrogenophilus
1915309	2	0	0	0	0	k__Bacteria; p__Proteobacteria; c__Oligoflexia; o__Silvanigrellales; f__Silvanigrellaceae; g__Silvanigrella; s__aquatica
97084	1	0	0	0	0	k__Bacteria; p__Proteobacteria; c__Oligoflexia; o__Bacteriovoracales; f__Halobacteriovoraceae; g__Halobacteriovorax; s__marinus
49546	1	0	1	0	0	k__Bacteria; p__Bacteroidetes; c__Flavobacteriia; o__Flavobacteriales; f__Flavobacteriaceae; g__; s__
2665645	2	0	1	0	0	k__Bacteria; p__Bacteroidetes; c__Flavobacteriia; o__Flavobacteriales; f__Flavobacteriaceae; g__Flavobacterium; s__sp. SLB02
1179672	1	0	2	0	0	k__Bacteria; p__Bacteroidetes; c__Flavobacteriia; o__Flavobacteriales; f__Flavobacteriaceae; g__Flavobacterium; s__sp. KBS0721
2249356	1	0	1	0	0	k__Bacteria; p__Bacteroidetes; c__Flavobacteriia; o__Flavobacteriales; f__Flavobacteriaceae; g__Flavobacterium; s__sp. HYN0086
2739062	1	0	0	0	0	k__Bacteria; p__Bacteroidetes; c__Flavobacteriia; o__Flavobacteriales; f__Flavobacteriaceae; g__Flavobacterium; s__sp. M31R6
1617283	2	0	1	0	0	k__Bacteria; p__Bacteroidetes; c__Flavobacteriia; o__Flavobacteriales; f__Flavobacteriaceae; g__Flavobacterium; s__nitrogenifigens
96345	2	0	1	0	0	k__Bacteria; p__Bacteroidetes; c__Flavobacteriia; o__Flavobacteriales; f__Flavobacteriaceae; g__Flavobacterium; s__psychrophilum
312277	2	0	0	0	0	k__Bacteria; p__Bacteroidetes; c__Flavobacteriia; o__Flavobacteriales; f__Flavobacteriaceae; g__Flavobacterium; s__indicum
683124	1	0	0	0	0	k__Bacteria; p__Bacteroidetes; c__Flavobacteriia; o__Flavobacteriales; f__Flavobacteriaceae; g__Flavobacterium; s__haoranii
2518177	1	0	1	0	0	k__Bacteria; p__Bacteroidetes; c__Flavobacteriia; o__Flavobacteriales; f__Flavobacteriaceae; g__Flavobacterium; s__sangjuense
55197	1	0	1	0	0	k__Bacteria; p__Bacteroidetes; c__Flavobacteriia; o__Flavobacteriales; f__Flavobacteriaceae; g__Flavobacterium; s__branchiophilum
2162713	1	0	0	0	0	k__Bacteria; p__Bacteroidetes; c__Flavobacteriia; o__Flavobacteriales; f__Flavobacteriaceae; g__Flavobacterium; s__magnum
1855336	2	0	1	0	0	k__Bacteria; p__Bacteroidetes; c__Flavobacteriia; o__Flavobacteriales; f__Flavobacteriaceae; g__Polaribacter; s__sp. KT25b
313598	1	0	1	0	0	k__Bacteria; p__Bacteroidetes; c__Flavobacteriia; o__Flavobacteriales; f__Flavobacteriaceae; g__Polaribacter; s__sp. MED152
2818493	1	0	0	0	0	k__Bacteria; p__Bacteroidetes; c__Flavobacteriia; o__Flavobacteriales; f__Flavobacteriaceae; g__Polaribacter; s__sp. SM13
996801	1	0	2	0	0	k__Bacteria; p__Bacteroidetes; c__Flavobacteriia; o__Flavobacteriales; f__Flavobacteriaceae; g__Polaribacter; s__reichenbachii
1836467	2	0	1	0	0	k__Bacteria; p__Bacteroidetes; c__Flavobacteriia; o__Flavobacteriales; f__Flavobacteriaceae; g__Maribacter; s__sp. T28
1644130	1	0	0	0	0	k__Bacteria; p__Bacteroidetes; c__Flavobacteriia; o__Flavobacteriales; f__Flavobacteriaceae; g__Maribacter; s__sp. 1_2014MBL_MicDiv
320912	1	0	0	0	0	k__Bacteria; p__Bacteroidetes; c__Flavobacteriia; o__Flavobacteriales; f__Flavobacteriaceae; g__Maribacter; s__dokdonensis
1178778	1	0	0	0	0	k__Bacteria; p__Bacteroidetes; c__Flavobacteriia; o__Flavobacteriales; f__Flavobacteriaceae; g__Maribacter; s__cobaltidurans
754409	1	0	1	0	0	k__Bacteria; p__Bacteroidetes; c__Flavobacteriia; o__Flavobacteriales; f__Flavobacteriaceae; g__Winogradskyella; s__sp. PG-2
1936080	1	0	0	0	0	k__Bacteria; p__Bacteroidetes; c__Flavobacteriia; o__Flavobacteriales; f__Flavobacteriaceae; g__Winogradskyella; s__sp. J14-2
107401	1	0	0	0	0	k__Bacteria; p__Bacteroidetes; c__Flavobacteriia; o__Flavobacteriales; f__Flavobacteriaceae; g__Tenacibaculum; s__maritimum
2058134	4	0	0	0	0	k__Bacteria; p__Bacteroidetes; c__Flavobacteriia; o__Flavobacteriales; f__Flavobacteriaceae; g__Nonlabens; s__sp. MB-3u-79
702745	1	0	0	0	0	k__Bacteria; p__Bacteroidetes; c__Flavobacteriia; o__Flavobacteriales; f__Flavobacteriaceae; g__Myroides; s__phaeus
28189	2	0	0	0	0	k__Bacteria; p__Bacteroidetes; c__Flavobacteriia; o__Flavobacteriales; f__Flavobacteriaceae; g__Capnocytophaga; s__cynodegmi
28188	1	0	0	0	0	k__Bacteria; p__Bacteroidetes; c__Flavobacteriia; o__Flavobacteriales; f__Flavobacteriaceae; g__Capnocytophaga; s__canimorsus
1848904	1	0	0	0	0	k__Bacteria; p__Bacteroidetes; c__Flavobacteriia; o__Flavobacteriales; f__Flavobacteriaceae; g__Capnocytophaga; s__stomatis
979	1	0	0	0	0	k__Bacteria; p__Bacteroidetes; c__Flavobacteriia; o__Flavobacteriales; f__Flavobacteriaceae; g__Cellulophaga; s__lytica
76594	1	0	2	0	0	k__Bacteria; p__Bacteroidetes; c__Flavobacteriia; o__Flavobacteriales; f__Flavobacteriaceae; g__Cellulophaga; s__baltica
2686362	1	0	1	0	0	k__Bacteria; p__Bacteroidetes; c__Flavobacteriia; o__Flavobacteriales; f__Flavobacteriaceae; g__Cellulophaga; s__sp. L1A9
1714848	2	0	1	0	0	k__Bacteria; p__Bacteroidetes; c__Flavobacteriia; o__Flavobacteriales; f__Flavobacteriaceae; g__Aquimarina; s__sp. AD1
762954	2	0	0	0	0	k__Bacteria; p__Bacteroidetes; c__Flavobacteriia; o__Flavobacteriales; f__Flavobacteriaceae; g__Siansivirga; s__zeaxanthinifaciens
616991	2	0	0	0	0	k__Bacteria; p__Bacteroidetes; c__Flavobacteriia; o__Flavobacteriales; f__Flavobacteriaceae; g__Arenibacter; s__algicola
2069432	1	0	0	0	0	k__Bacteria; p__Bacteroidetes; c__Flavobacteriia; o__Flavobacteriales; f__Flavobacteriaceae; g__Tamlana; s__carrageenivorans
2027857	1	0	1	0	0	k__Bacteria; p__Bacteroidetes; c__Flavobacteriia; o__Flavobacteriales; f__Flavobacteriaceae; g__Mariniflexile; s__sp. TRM1-10
2686365	1	0	0	0	0	k__Bacteria; p__Bacteroidetes; c__Flavobacteriia; o__Flavobacteriales; f__Flavobacteriaceae; g__Algibacter; s__sp. L1A34
1336796	1	0	1	0	0	k__Bacteria; p__Bacteroidetes; c__Flavobacteriia; o__Flavobacteriales; f__Flavobacteriaceae; g__Gillisia; s__sp. Hel1_33_143
313588	1	0	0	0	0	k__Bacteria; p__Bacteroidetes; c__Flavobacteriia; o__Flavobacteriales; f__Flavobacteriaceae; g__Croceibacter; s__atlanticus
2529032	1	0	1	0	0	k__Bacteria; p__Bacteroidetes; c__Flavobacteriia; o__Flavobacteriales; f__Flavobacteriaceae; g__Oceanihabitans; s__sp. IOP_32
2698672	1	0	0	0	0	k__Bacteria; p__Bacteroidetes; c__Flavobacteriia; o__Flavobacteriales; f__Flavobacteriaceae; g__Muricauda; s__sp. 501str8
2585771	1	0	0	0	0	k__Bacteria; p__Bacteroidetes; c__Flavobacteriia; o__Flavobacteriales; f__Flavobacteriaceae; g__Antarcticibacterium; s__arcticum
2594269	2	0	0	0	0	k__Bacteria; p__Bacteroidetes; c__Flavobacteriia; o__Flavobacteriales; f__Weeksellaceae; g__Chryseobacterium; s__sp. SNU WT5
1685010	4	0	1	0	0	k__Bacteria; p__Bacteroidetes; c__Flavobacteriia; o__Flavobacteriales; f__Weeksellaceae; g__Chryseobacterium; s__glaciei
112234	1	0	0	0	0	k__Bacteria; p__Bacteroidetes; c__Flavobacteriia; o__Flavobacteriales; f__Weeksellaceae; g__Chryseobacterium; s__joostei
558152	1	0	0	0	0	k__Bacteria; p__Bacteroidetes; c__Flavobacteriia; o__Flavobacteriales; f__Weeksellaceae; g__Chryseobacterium; s__piperi
246	1	0	0	0	0	k__Bacteria; p__Bacteroidetes; c__Flavobacteriia; o__Flavobacteriales; f__Weeksellaceae; g__Chryseobacterium; s__balustinum
1265445	1	0	0	0	0	k__Bacteria; p__Bacteroidetes; c__Flavobacteriia; o__Flavobacteriales; f__Weeksellaceae; g__Chryseobacterium; s__camelliae
266748	2	0	1	0	0	k__Bacteria; p__Bacteroidetes; c__Flavobacteriia; o__Flavobacteriales; f__Weeksellaceae; g__Kaistella; s__antarctica
2487074	1	0	0	0	0	k__Bacteria; p__Bacteroidetes; c__Flavobacteriia; o__Flavobacteriales; f__Weeksellaceae; g__Kaistella; s__daneshvariae
536441	1	0	1	0	0	k__Bacteria; p__Bacteroidetes; c__Flavobacteriia; o__Flavobacteriales; f__Weeksellaceae; g__Planobacterium; s__Chryseobacterium taklimakanense
308865	1	0	0	0	0	k__Bacteria; p__Bacteroidetes; c__Flavobacteriia; o__Flavobacteriales; f__Weeksellaceae; g__Elizabethkingia; s__
2575699	3	0	0	0	0	k__Bacteria; p__Bacteroidetes; c__Flavobacteriia; o__Flavobacteriales; f__Weeksellaceae; g__Elizabethkingia; s__sp. 2-6
238	2	0	0	0	0	k__Bacteria; p__Bacteroidetes; c__Flavobacteriia; o__Flavobacteriales; f__Weeksellaceae; g__Elizabethkingia; s__meningoseptica
172045	1	0	0	0	0	k__Bacteria; p__Bacteroidetes; c__Flavobacteriia; o__Flavobacteriales; f__Weeksellaceae; g__Elizabethkingia; s__miricola
1014	2	0	0	0	0	k__Bacteria; p__Bacteroidetes; c__Flavobacteriia; o__Flavobacteriales; f__Weeksellaceae; g__Weeksella; s__virosa
2656760	1	0	0	0	0	k__Bacteria; p__Bacteroidetes; c__Flavobacteriia; o__Flavobacteriales; f__Weeksellaceae; g__Apibacter; s__sp. B3706
164514	1	0	0	0	0	k__Bacteria; p__Bacteroidetes; c__Flavobacteriia; o__Flavobacteriales; f__Blattabacteriaceae; g__Blattabacterium; s__punctulatus
1186051	1	0	0	0	0	k__Bacteria; p__Bacteroidetes; c__Flavobacteriia; o__Flavobacteriales; f__Blattabacteriaceae; g__Blattabacterium; s__sp. (Blaberus giganteus)
336810	1	0	0	0	0	k__Bacteria; p__Bacteroidetes; c__Flavobacteriia; o__Flavobacteriales; f__Blattabacteriaceae; g__Candidatus Sulcia; s__muelleri
2268026	5	0	0	0	0	k__Bacteria; p__Bacteroidetes; c__Cytophagia; o__Cytophagales; f__Cytophagaceae; g__Runella; s__sp. SP2
2259595	1	0	1	0	0	k__Bacteria; p__Bacteroidetes; c__Cytophagia; o__Cytophagales; f__Cytophagaceae; g__Runella; s__sp. HYN0085
2520506	1	0	0	0	0	k__Bacteria; p__Bacteroidetes; c__Cytophagia; o__Cytophagales; f__Cytophagaceae; g__Spirosoma; s__sp. KCTC 42546
2728024	1	0	0	0	0	k__Bacteria; p__Bacteroidetes; c__Cytophagia; o__Cytophagales; f__Cytophagaceae; g__Spirosoma; s__sp. CJU-R4
2666025	1	0	0	0	0	k__Bacteria; p__Bacteroidetes; c__Cytophagia; o__Cytophagales; f__Cytophagaceae; g__Spirosoma; s__endbachense
323450	1	0	0	0	0	k__Bacteria; p__Bacteroidetes; c__Cytophagia; o__Cytophagales; f__Hymenobacteraceae; g__Pontibacter; s__actiniarum
2714932	1	0	0	0	0	k__Bacteria; p__Bacteroidetes; c__Cytophagia; o__Cytophagales; f__Hymenobacteraceae; g__Hymenobacter; s__sp. HDW8
2724192	1	0	0	0	0	k__Bacteria; p__Bacteroidetes; c__Cytophagia; o__Cytophagales; f__Hymenobacteraceae; g__Hymenobacter; s__russus
2745197	1	0	1	0	0	k__Bacteria; p__Bacteroidetes; c__Cytophagia; o__Cytophagales; f__Hymenobacteraceae; g__Adhaeribacter; s__radiodurans
1191459	3	0	0	0	0	k__Bacteria; p__Bacteroidetes; c__Cytophagia; o__Cytophagales; f__Flammeovirgaceae; g__Flammeovirga; s__sp. MY04
2494373	1	0	1	0	0	k__Bacteria; p__Bacteroidetes; c__Cytophagia; o__Cytophagales; f__Flammeovirgaceae; g__Flammeovirga; s__pectinis
2772483	1	0	0	0	0	k__Bacteria; p__Bacteroidetes; c__Cytophagia; o__Cytophagales; f__Cyclobacteriaceae; g__Algoriphagus; s__sp. Y33
390884	1	0	0	0	0	k__Bacteria; p__Bacteroidetes; c__Cytophagia; o__Cytophagales; f__Cyclobacteriaceae; g__Echinicola; s__vietnamensis
999	1	0	0	0	0	k__Bacteria; p__Bacteroidetes; c__Cytophagia; o__Cytophagales; f__Bernardetiaceae; g__Bernardetia; s__litoralis
2810512	1	0	1	0	0	k__Bacteria; p__Bacteroidetes; c__Cytophagia; o__Cytophagales; f__Fulvivirgaceae; g__Fulvivirga; s__sp. S481
816	1	0	2	0	0	k__Bacteria; p__Bacteroidetes; c__Bacteroidia; o__Bacteroidales; f__Bacteroidaceae; g__Bacteroides; s__
817	1	0	1	0	0	k__Bacteria; p__Bacteroidetes; c__Bacteroidia; o__Bacteroidales; f__Bacteroidaceae; g__Bacteroides; s__fragilis
47678	1	0	1	0	0	k__Bacteria; p__Bacteroidetes; c__Bacteroidia; o__Bacteroidales; f__Bacteroidaceae; g__Bacteroides; s__caccae
151276	1	0	1	0	0	k__Bacteria; p__Bacteroidetes; c__Bacteroidia; o__Bacteroidales; f__Bacteroidaceae; g__Bacteroides; s__coprosuis
2650157	1	0	0	0	0	k__Bacteria; p__Bacteroidetes; c__Bacteroidia; o__Bacteroidales; f__Bacteroidaceae; g__Bacteroides; s__sp. HF-5287
1796646	1	0	0	0	0	k__Bacteria; p__Bacteroidetes; c__Bacteroidia; o__Bacteroidales; f__Muribaculaceae; g__Muribaculum; s__intestinale
2530390	1	0	0	0	0	k__Bacteria; p__Bacteroidetes; c__Bacteroidia; o__Bacteroidales; f__Muribaculaceae; g__Muribaculum; s__gordoncarteri
838	1	0	0	0	0	k__Bacteria; p__Bacteroidetes; c__Bacteroidia; o__Bacteroidales; f__Prevotellaceae; g__Prevotella; s__
909656	1	0	1	0	0	k__Bacteria; p__Bacteroidetes; c__Bacteroidia; o__Bacteroidales; f__Rikenellaceae; g__Phocaeicola; s__
28118	1	0	0	0	0	k__Bacteria; p__Bacteroidetes; c__Bacteroidia; o__Bacteroidales; f__Odoribacteraceae; g__Odoribacter; s__splanchnicus
1307839	1	0	1	0	0	k__Bacteria; p__Bacteroidetes; c__Bacteroidia; o__Bacteroidales; f__Salinivirgaceae; g__Salinivirga; s__cyanobacteriivorans
397865	1	0	0	0	0	k__Bacteria; p__Bacteroidetes; c__Bacteroidia; o__Bacteroidales; f__Barnesiellaceae; g__Barnesiella; s__viscericola
28112	1	0	0	0	0	k__Bacteria; p__Bacteroidetes; c__Bacteroidia; o__Bacteroidales; f__Tannerellaceae; g__Tannerella; s__forsythia
371142	1	0	3	0	0	k__Bacteria; p__Bacteroidetes; c__Sphingobacteriia; o__Sphingobacteriales; f__Sphingobacteriaceae; g__Sphingobacterium; s__daejeonense
2662364	1	0	0	0	0	k__Bacteria; p__Bacteroidetes; c__Sphingobacteriia; o__Sphingobacteriales; f__Sphingobacteriaceae; g__Sphingobacterium; s__sp. dk4302
2605747	1	0	0	0	0	k__Bacteria; p__Bacteroidetes; c__Sphingobacteriia; o__Sphingobacteriales; f__Sphingobacteriaceae; g__Pedobacter; s__sp. CJ43
336820	1	0	0	0	0	k__Bacteria; p__Bacteroidetes; c__Sphingobacteriia; o__Sphingobacteriales; f__Sphingobacteriaceae; g__Pedobacter; s__roseus
1550579	1	0	0	0	0	k__Bacteria; p__Bacteroidetes; c__Sphingobacteriia; o__Sphingobacteriales; f__Sphingobacteriaceae; g__Mucilaginibacter; s__gotjawali
2728022	1	0	0	0	0	k__Bacteria; p__Bacteroidetes; c__Sphingobacteriia; o__Sphingobacteriales; f__Sphingobacteriaceae; g__Mucilaginibacter; s__sp. F39-2
995	1	0	0	0	0	k__Bacteria; p__Bacteroidetes; c__Sphingobacteriia; o__Sphingobacteriales; f__Sphingobacteriaceae; g__Solitalea; s__canadensis
2203219	1	0	0	0	0	k__Bacteria; p__Bacteroidetes; c__Chitinophagia; o__Chitinophagales; f__Chitinophagaceae; g__Chitinophaga; s__alhagiae
2341117	1	0	0	0	0	k__Bacteria; p__Bacteroidetes; c__Chitinophagia; o__Chitinophagales; f__Chitinophagaceae; g__Arachidicoccus; s__soli
2350	1	0	2	0	0	k__Bacteria; p__Bacteroidetes; c__Saprospiria; o__Saprospirales; f__Haliscomenobacteraceae; g__Haliscomenobacter; s__hydrossis
1457365	1	0	1	0	0	k__Bacteria; p__Balneolaeota; c__; o__; f__; g__Candidatus Cyclonatronum; s__proteinivorum
859	1	0	1	0	0	k__Bacteria; p__Fusobacteria; c__Fusobacteriia; o__Fusobacteriales; f__Fusobacteriaceae; g__Fusobacterium; s__necrophorum
860	1	0	0	0	0	k__Bacteria; p__Fusobacteria; c__Fusobacteriia; o__Fusobacteriales; f__Fusobacteriaceae; g__Fusobacterium; s__periodonticum
1583098	1	0	3	0	0	k__Bacteria; p__Fusobacteria; c__Fusobacteriia; o__Fusobacteriales; f__Fusobacteriaceae; g__Fusobacterium; s__hwasookii
554406	2	0	0	0	0	k__Bacteria; p__Fusobacteria; c__Fusobacteriia; o__Fusobacteriales; f__Leptotrichiaceae; g__Leptotrichia; s__hongkongensis
109328	1	0	0	0	0	k__Bacteria; p__Fusobacteria; c__Fusobacteriia; o__Fusobacteriales; f__Leptotrichiaceae; g__Leptotrichia; s__trevisanii
157691	1	0	0	0	0	k__Bacteria; p__Fusobacteria; c__Fusobacteriia; o__Fusobacteriales; f__Leptotrichiaceae; g__Leptotrichia; s__shahii
712357	1	0	0	0	0	k__Bacteria; p__Fusobacteria; c__Fusobacteriia; o__Fusobacteriales; f__Leptotrichiaceae; g__Leptotrichia; s__sp. oral taxon 212
826	2	0	0	0	0	k__Bacteria; p__Fusobacteria; c__Fusobacteriia; o__Fusobacteriales; f__Leptotrichiaceae; g__Sebaldella; s__termitidis
187101	1	0	1	0	0	k__Bacteria; p__Fusobacteria; c__Fusobacteriia; o__Fusobacteriales; f__Leptotrichiaceae; g__Sneathia; s__vaginalis
157692	1	0	1	0	0	k__Bacteria; p__Fusobacteria; c__Fusobacteriia; o__Fusobacteriales; f__Leptotrichiaceae; g__Pseudoleptotrichia; s__goodfellowii
138	1	0	2	0	0	k__Bacteria; p__Spirochaetes; c__Spirochaetia; o__Spirochaetales; f__Borreliaceae; g__Borrelia; s__
144	1	0	0	0	0	k__Bacteria; p__Spirochaetes; c__Spirochaetia; o__Spirochaetales; f__Borreliaceae; g__Borrelia; s__coriaceae
29519	1	0	0	0	0	k__Bacteria; p__Spirochaetes; c__Spirochaetia; o__Spirochaetales; f__Borreliaceae; g__Borreliella; s__garinii
1964448	1	0	0	0	0	k__Bacteria; p__Spirochaetes; c__Spirochaetia; o__Spirochaetales; f__Borreliaceae; g__Borreliella; s__Candidatus Borrelia tachyglossi
53419	1	0	0	0	0	k__Bacteria; p__Spirochaetes; c__Spirochaetia; o__Spirochaetales; f__Spirochaetaceae; g__Treponema; s__socranskii
58231	1	0	0	0	0	k__Bacteria; p__Spirochaetes; c__Spirochaetia; o__Spirochaetales; f__Spirochaetaceae; g__Treponema; s__medium
409322	1	0	1	0	0	k__Bacteria; p__Spirochaetes; c__Spirochaetia; o__Spirochaetales; f__Spirochaetaceae; g__Treponema; s__pedis
28183	1	0	2	0	0	k__Bacteria; p__Spirochaetes; c__Spirochaetia; o__Leptospirales; f__Leptospiraceae; g__Leptospira; s__santarosai
28184	1	0	0	0	0	k__Bacteria; p__Spirochaetes; c__Spirochaetia; o__Leptospirales; f__Leptospiraceae; g__Leptospira; s__weilii
2527964	2	0	0	0	0	k__Bacteria; p__Planctomycetes; c__Planctomycetia; o__Planctomycetales; f__Planctomycetaceae; g__Gimesia; s__aquarii
2527973	1	0	0	0	0	k__Bacteria; p__Planctomycetes; c__Planctomycetia; o__Planctomycetales; f__Planctomycetaceae; g__Gimesia; s__alba
2527994	1	0	0	0	0	k__Bacteria; p__Planctomycetes; c__Planctomycetia; o__Planctomycetales; f__Planctomycetaceae; g__Thalassoglobus; s__polymorphus
1632865	1	0	0	0	0	k__Bacteria; p__Planctomycetes; c__Planctomycetia; o__Pirellulales; f__Pirellulaceae; g__Pirellula; s__sp. SH-Sr6A
1457153	1	0	0	0	0	k__Bacteria; p__Chlamydiae; c__Chlamydiia; o__Chlamydiales; f__Chlamydiaceae; g__Chlamydia; s__gallinacea
1967782	1	0	1	0	0	k__Bacteria; p__Chlamydiae; c__Chlamydiia; o__Chlamydiales; f__Chlamydiaceae; g__Chlamydia; s__sp. H15-1957-10C
83552	1	0	0	0	0	k__Bacteria; p__Chlamydiae; c__Chlamydiia; o__Parachlamydiales; f__Parachlamydiaceae; g__Parachlamydia; s__acanthamoebae
239935	1	0	0	0	0	k__Bacteria; p__Verrucomicrobia; c__Verrucomicrobiae; o__Verrucomicrobiales; f__Akkermansiaceae; g__Akkermansia; s__muciniphila
46541	1	0	1	0	0	k__Bacteria; p__Thermotogae; c__Thermotogae; o__Thermotogales; f__Fervidobacteriaceae; g__Thermosipho; s__melanesiensis
160798	1	0	0	0	0	k__Bacteria; p__Thermotogae; c__Thermotogae; o__Petrotogales; f__Petrotogaceae; g__Marinitoga; s__
1441386	1	0	0	0	0	k__Bacteria; p__Thermotogae; c__Thermotogae; o__Mesoaciditogales; f__Mesoaciditogaceae; g__Athalassotoga; s__saccharophila
309805	1	0	0	0	0	k__Bacteria; p__Aquificae; c__Aquificae; o__Aquificales; f__Hydrogenothermaceae; g__Persephonella; s__marina
197162	1	0	0	0	0	k__Bacteria; p__Deferribacteres; c__Deferribacteres; o__Deferribacterales; f__Deferribacteraceae; g__Deferribacter; s__desulfuricans
477976	1	0	0	0	0	k__Bacteria; p__Deferribacteres; c__Deferribacteres; o__Deferribacterales; f__Deferribacteraceae; g__Calditerrivibrio; s__nitroreducens
1295609	1	0	0	0	0	k__Bacteria; p__Thermodesulfobacteria; c__Thermodesulfobacteria; o__Thermodesulfobacteriales; f__Thermodesulfobacteriaceae; g__Thermodesulfobacterium; s__geofontis
2234087	1	0	0	0	0	k__Bacteria; p__Thermodesulfobacteria; c__Thermodesulfobacteria; o__Thermodesulfobacteriales; f__Thermodesulfobacteriaceae; g__Thermodesulfobacterium; s__sp. TA1
39152	1	0	2	0	0	k__Archaea; p__Euryarchaeota; c__Methanococci; o__Methanococcales; f__Methanococcaceae; g__Methanococcus; s__maripaludis
42879	1	0	0	0	0	k__Archaea; p__Euryarchaeota; c__Methanococci; o__Methanococcales; f__Methanococcaceae; g__Methanococcus; s__aeolicus
196118	1	0	0	0	0	k__Archaea; p__Euryarchaeota; c__Methanococci; o__Methanococcales; f__Methanocaldococcaceae; g__Methanocaldococcus; s__
2190	1	0	0	0	0	k__Archaea; p__Euryarchaeota; c__Methanococci; o__Methanococcales; f__Methanocaldococcaceae; g__Methanocaldococcus; s__jannaschii
1301915	1	0	1	0	0	k__Archaea; p__Euryarchaeota; c__Methanococci; o__Methanococcales; f__Methanocaldococcaceae; g__Methanocaldococcus; s__bathoardescens
224719	2	0	0	0	0	k__Archaea; p__Euryarchaeota; c__Methanobacteria; o__Methanobacteriales; f__Methanobacteriaceae; g__Methanobrevibacter; s__sp. AbM4
2210	1	0	0	0	0	k__Archaea; p__Euryarchaeota; c__Methanomicrobia; o__Methanosarcinales; f__Methanosarcinaceae; g__Methanosarcina; s__thermophila
101192	1	0	0	0	0	k__Archaea; p__Euryarchaeota; c__Methanomicrobia; o__Methanosarcinales; f__Methanosarcinaceae; g__Methanomethylovorans; s__hollandica
39669	1	0	0	0	0	k__Archaea; p__Euryarchaeota; c__Methanomicrobia; o__Methanosarcinales; f__Methanosarcinaceae; g__Methanosalsum; s__zhilinae
2201	1	0	0	0	0	k__Archaea; p__Euryarchaeota; c__Methanomicrobia; o__Methanomicrobiales; f__Methanomicrobiaceae; g__Methanofollis; s__liminatans
55802	1	0	1	0	0	k__Archaea; p__Euryarchaeota; c__Thermococci; o__Thermococcales; f__Thermococcaceae; g__Thermococcus; s__barophilus
172049	1	0	0	0	0	k__Archaea; p__Euryarchaeota; c__Thermococci; o__Thermococcales; f__Thermococcaceae; g__Thermococcus; s__sibiricus
971279	1	0	0	0	0	k__Archaea; p__Euryarchaeota; c__Thermococci; o__Thermococcales; f__Thermococcaceae; g__Palaeococcus; s__pacificus
2285	2	0	1	0	0	k__Archaea; p__Crenarchaeota; c__Thermoprotei; o__Sulfolobales; f__Sulfolobaceae; g__Sulfolobus; s__acidocaldarius
2512240	1	0	0	0	0	k__Archaea; p__Crenarchaeota; c__Thermoprotei; o__Sulfolobales; f__Sulfolobaceae; g__Sulfolobus; s__sp. S-194
282676	1	0	0	0	0	k__Archaea; p__Crenarchaeota; c__Thermoprotei; o__Sulfolobales; f__Sulfolobaceae; g__Acidianus; s__manzaensis
2280	1	0	0	0	0	k__Archaea; p__Crenarchaeota; c__Thermoprotei; o__Desulfurococcales; f__Desulfurococcaceae; g__Staphylothermus; s__marinus
54254	1	0	0	0	0	k__Archaea; p__Crenarchaeota; c__Thermoprotei; o__Desulfurococcales; f__Desulfurococcaceae; g__Thermosphaera; s__aggregans
105850	1	0	0	0	0	k__Archaea; p__Crenarchaeota; c__Thermoprotei; o__Acidilobales; f__Acidilobaceae; g__Acidilobus; s__
1826872	1	0	0	0	0	k__Archaea; p__Thaumarchaeota; c__Nitrososphaeria; o__Nitrososphaerales; f__Nitrososphaeraceae; g__Candidatus Nitrosocosmicus; s__hydrocola
1920749	1	0	0	0	0	k__Archaea; p__Candidatus Micrarchaeota; c__; o__; f__; g__Candidatus Mancarchaeum; s__acidiphilum
2594042	1	0	1	0	0	k__Archaea; p__Candidatus Lokiarchaeota; c__; o__; f__; g__Candidatus Prometheoarchaeum; s__syntrophicum
1673428	1	0	0	0	0	k__Archaea; p__Candidatus Thermoplasmatota; c__Thermoplasmata; o__Thermoplasmatales; f__Cuniculiplasmataceae; g__Cuniculiplasma; s__divulgatum
985782	2	0	1	0	0	k__Viruses; p__Nucleocytoviricota; c__Megaviricetes; o__Imitervirales; f__Mimiviridae; g__Mimivirus; s__Moumouvirus
1076255	1	0	0	0	0	k__Viruses; p__Nucleocytoviricota; c__Pokkesviricetes; o__Chitovirales; f__Poxviridae; g__Centapoxvirus; s__Yokapox virus
28871	1	0	0	0	0	k__Viruses; p__Nucleocytoviricota; c__Pokkesviricetes; o__Chitovirales; f__Poxviridae; g__Orthopoxvirus; s__Taterapox virus
1173297	1	0	0	0	0	k__Viruses; p__Uroviricota; c__Caudoviricetes; o__Caudovirales; f__Myoviridae; g__; s__Halocynthia phage JM-2012
2170215	1	0	0	0	0	k__Viruses; p__Uroviricota; c__Caudoviricetes; o__Caudovirales; f__Podoviridae; g__Ithacavirus; s__Escherichia virus Pollock
32604	1	0	0	0	0	k__Viruses; p__Peploviricota; c__Herviviricetes; o__Herpesvirales; f__Herpesviridae; g__Roseolovirus; s__Human betaherpesvirus 6B
2734372	1	0	0	0	0	k__Viruses; p__Negarnaviricota; c__Monjiviricetes; o__Mononegavirales; f__Rhabdoviridae; g__Arurhavirus; s__Santabarbara arurhavirus
85454	1	0	0	0	0	k__Viruses; p__Kitrinoviricota; c__Alsuviricetes; o__Tymovirales; f__Alphaflexiviridae; g__Potexvirus; s__Alternanthera mosaic virus
2315806	1	0	0	0	0	k__Viruses; p__Pisuviricota; c__Pisoniviricetes; o__Picornavirales; f__; g__; s__Yongsan picorna-like virus 3
1923723	1	0	0	0	0	k__Viruses; p__Pisuviricota; c__Pisoniviricetes; o__Picornavirales; f__; g__; s__Wuhan insect virus 19
56947	1	0	0	0	0	k__Viruses; p__Pisuviricota; c__Pisoniviricetes; o__Picornavirales; f__Baculoviridae; g__Betabaculovirus; s__Choristoneura fumiferana granulovirus
1932881	1	0	0	0	0	k__Viruses; p__Pisuviricota; c__Pisoniviricetes; o__Picornavirales; f__Baculoviridae; g__Betabaculovirus; s__Pacmanvirus A23
27291	0	0	1	0	0	k__Eukaryota; p__Ascomycota; c__Saccharomycetes; o__Saccharomycetales; f__Saccharomycetaceae; g__Saccharomyces; s__paradoxus
45285	0	0	1	0	0	k__Eukaryota; p__Ascomycota; c__Saccharomycetes; o__Saccharomycetales; f__Saccharomycetaceae; g__Eremothecium; s__cymbalariae
48254	0	0	1	0	0	k__Eukaryota; p__Ascomycota; c__Saccharomycetes; o__Saccharomycetales; f__Saccharomycetaceae; g__Torulaspora; s__globosa
13502	0	0	2	0	0	k__Eukaryota; p__Ascomycota; c__Saccharomycetes; o__Saccharomycetales; f__Pichiaceae; g__Brettanomyces; s__nanus
460519	0	0	1	0	0	k__Eukaryota; p__Ascomycota; c__Saccharomycetes; o__Saccharomycetales; f__Phaffomycetaceae; g__Komagataella; s__phaffii
80884	0	0	1	0	0	k__Eukaryota; p__Ascomycota; c__Sordariomycetes; o__Glomerellales; f__Glomerellaceae; g__Colletotrichum; s__higginsianum
5207	0	0	2	0	0	k__Eukaryota; p__Basidiomycota; c__Tremellomycetes; o__Tremellales; f__Cryptococcaceae; g__Cryptococcus; s__neoformans
571949	0	0	1	0	0	k__Eukaryota; p__Microsporidia; c__; o__; f__Unikaryonidae; g__Encephalitozoon; s__romaleae
68886	0	0	1	0	0	k__Eukaryota; p__Apicomplexa; c__Aconoidasida; o__Piroplasmida; f__Theileriidae; g__Theileria; s__orientalis
5865	0	0	1	0	0	k__Eukaryota; p__Apicomplexa; c__Aconoidasida; o__Piroplasmida; f__Babesiidae; g__Babesia; s__bovis
227086	0	0	1	0	0	k__Eukaryota; p__Cercozoa; c__Chlorarachniophyceae; o__; f__; g__Bigelowiella; s__natans
464988	0	0	1	0	0	k__Eukaryota; p__Euglenozoa; c__Cryptophyceae; o__Cryptomonadales; f__Hemiselmidaceae; g__Hemiselmis; s__andersenii
1499973	0	0	1	0	0	k__Bacteria; p__Proteobacteria; c__Gammaproteobacteria; o__Enterobacterales; f__Enterobacteriaceae; g__Escherichia; s__marmotae
2742676	0	0	1	0	0	k__Bacteria; p__Proteobacteria; c__Gammaproteobacteria; o__Enterobacterales; f__Enterobacteriaceae; g__Enterobacter; s__sp. RHBSTW-00994
2742639	0	0	1	0	0	k__Bacteria; p__Proteobacteria; c__Gammaproteobacteria; o__Enterobacterales; f__Enterobacteriaceae; g__Enterobacter; s__sp. RHBSTW-00175
881260	0	0	1	0	0	k__Bacteria; p__Proteobacteria; c__Gammaproteobacteria; o__Enterobacterales; f__Enterobacteriaceae; g__Enterobacter; s__bugandensis
885040	0	0	1	0	0	k__Bacteria; p__Proteobacteria; c__Gammaproteobacteria; o__Enterobacterales; f__Enterobacteriaceae; g__Enterobacter; s__soli
2675776	0	0	1	0	0	k__Bacteria; p__Proteobacteria; c__Gammaproteobacteria; o__Enterobacterales; f__Enterobacteriaceae; g__Enterobacter; s__aceae endosymbiont of Donacia crassipes
2675793	0	0	1	0	0	k__Bacteria; p__Proteobacteria; c__Gammaproteobacteria; o__Enterobacterales; f__Enterobacteriaceae; g__Enterobacter; s__aceae endosymbiont of Plateumaris braccata
2675782	0	0	1	0	0	k__Bacteria; p__Proteobacteria; c__Gammaproteobacteria; o__Enterobacterales; f__Enterobacteriaceae; g__Enterobacter; s__aceae endosymbiont of Donacia proxima
203804	0	0	1	0	0	k__Bacteria; p__Proteobacteria; c__Gammaproteobacteria; o__Enterobacterales; f__Enterobacteriaceae; g__Candidatus Blochmannia; s__
138072	0	0	1	0	0	k__Bacteria; p__Proteobacteria; c__Gammaproteobacteria; o__Enterobacterales; f__Enterobacteriaceae; g__Candidatus Hamiltonella; s__defensa
2579935	0	0	1	0	0	k__Bacteria; p__Proteobacteria; c__Gammaproteobacteria; o__Enterobacterales; f__Enterobacteriaceae; g__Jejubacter; s__calystegiae
1330547	0	0	1	0	0	k__Bacteria; p__Proteobacteria; c__Gammaproteobacteria; o__Enterobacterales; f__Enterobacteriaceae; g__Kosakonia; s__
55209	0	0	1	0	0	k__Bacteria; p__Proteobacteria; c__Gammaproteobacteria; o__Enterobacterales; f__Erwiniaceae; g__Pantoea; s__cypripedii
470934	0	0	1	0	0	k__Bacteria; p__Proteobacteria; c__Gammaproteobacteria; o__Enterobacterales; f__Erwiniaceae; g__Pantoea; s__vagans
1484158	0	0	1	0	0	k__Bacteria; p__Proteobacteria; c__Gammaproteobacteria; o__Enterobacterales; f__Erwiniaceae; g__Pantoea; s__sp. PSNIH1
638	0	0	1	0	0	k__Bacteria; p__Proteobacteria; c__Gammaproteobacteria; o__Enterobacterales; f__Morganellaceae; g__Arsenophonus; s__nasoniae
634113	0	0	1	0	0	k__Bacteria; p__Proteobacteria; c__Gammaproteobacteria; o__Enterobacterales; f__Morganellaceae; g__Arsenophonus; s__Candidatus Arsenophonus lipoptenae
40576	0	0	1	0	0	k__Bacteria; p__Proteobacteria; c__Gammaproteobacteria; o__Enterobacterales; f__Morganellaceae; g__Xenorhabdus; s__bovienii
629	0	0	1	0	0	k__Bacteria; p__Proteobacteria; c__Gammaproteobacteria; o__Enterobacterales; f__Yersiniaceae; g__Yersinia; s__
633	0	0	1	0	0	k__Bacteria; p__Proteobacteria; c__Gammaproteobacteria; o__Enterobacterales; f__Yersiniaceae; g__Yersinia; s__pseudotuberculosis
82996	0	0	1	0	0	k__Bacteria; p__Proteobacteria; c__Gammaproteobacteria; o__Enterobacterales; f__Yersiniaceae; g__Serratia; s__plymuthica
34037	0	0	1	0	0	k__Bacteria; p__Proteobacteria; c__Gammaproteobacteria; o__Enterobacterales; f__Yersiniaceae; g__Rahnella; s__
929813	0	0	1	0	0	k__Bacteria; p__Proteobacteria; c__Gammaproteobacteria; o__Enterobacterales; f__Yersiniaceae; g__Gibbsiella; s__quercinecans
635	0	0	1	0	0	k__Bacteria; p__Proteobacteria; c__Gammaproteobacteria; o__Enterobacterales; f__Hafniaceae; g__Edwardsiella; s__
67780	0	0	5	0	0	k__Bacteria; p__Proteobacteria; c__Gammaproteobacteria; o__Enterobacterales; f__Hafniaceae; g__Edwardsiella; s__ictaluri
93378	0	0	1	0	0	k__Bacteria; p__Proteobacteria; c__Gammaproteobacteria; o__Enterobacterales; f__Hafniaceae; g__Edwardsiella; s__hoshinae
29471	0	0	1	0	0	k__Bacteria; p__Proteobacteria; c__Gammaproteobacteria; o__Enterobacterales; f__Pectobacteriaceae; g__Pectobacterium; s__atrosepticum
180957	0	0	1	0	0	k__Bacteria; p__Proteobacteria; c__Gammaproteobacteria; o__Enterobacterales; f__Pectobacteriaceae; g__Pectobacterium; s__brasiliense
204042	0	0	1	0	0	k__Bacteria; p__Proteobacteria; c__Gammaproteobacteria; o__Enterobacterales; f__Pectobacteriaceae; g__Dickeya; s__zeae
1172565	0	0	1	0	0	k__Bacteria; p__Proteobacteria; c__Gammaproteobacteria; o__Enterobacterales; f__Pectobacteriaceae; g__Lonsdalea; s__populi
2069256	0	0	1	0	0	k__Bacteria; p__Proteobacteria; c__Gammaproteobacteria; o__Pseudomonadales; f__Pseudomonadaceae; g__Pseudomonas; s__sp. XWY-1
2724470	0	0	1	0	0	k__Bacteria; p__Proteobacteria; c__Gammaproteobacteria; o__Pseudomonadales; f__Pseudomonadaceae; g__Pseudomonas; s__sp. BIGb0427
2785331	0	0	1	0	0	k__Bacteria; p__Proteobacteria; c__Gammaproteobacteria; o__Pseudomonadales; f__Pseudomonadaceae; g__Entomomonas; s__sp. F2A
487316	0	0	1	0	0	k__Bacteria; p__Proteobacteria; c__Gammaproteobacteria; o__Pseudomonadales; f__Moraxellaceae; g__Acinetobacter; s__soli
1808001	0	0	1	0	0	k__Bacteria; p__Proteobacteria; c__Gammaproteobacteria; o__Pseudomonadales; f__Moraxellaceae; g__Acinetobacter; s__sp. LoGeW2-3
28090	0	0	1	0	0	k__Bacteria; p__Proteobacteria; c__Gammaproteobacteria; o__Pseudomonadales; f__Moraxellaceae; g__Acinetobacter; s__lwoffii
571800	0	0	1	0	0	k__Bacteria; p__Proteobacteria; c__Gammaproteobacteria; o__Pseudomonadales; f__Moraxellaceae; g__Psychrobacter; s__sp. G
670	0	0	1	0	0	k__Bacteria; p__Proteobacteria; c__Gammaproteobacteria; o__Vibrionales; f__Vibrionaceae; g__Vibrio; s__parahaemolyticus
2014742	0	0	1	0	0	k__Bacteria; p__Proteobacteria; c__Gammaproteobacteria; o__Vibrionales; f__Vibrionaceae; g__Vibrio; s__sp. 2521-89
2163016	0	0	1	0	0	k__Bacteria; p__Proteobacteria; c__Gammaproteobacteria; o__Vibrionales; f__Vibrionaceae; g__Vibrio; s__sp. dhg
1435069	0	0	1	0	0	k__Bacteria; p__Proteobacteria; c__Gammaproteobacteria; o__Vibrionales; f__Vibrionaceae; g__Vibrio; s__tritonius
52443	0	0	1	0	0	k__Bacteria; p__Proteobacteria; c__Gammaproteobacteria; o__Vibrionales; f__Vibrionaceae; g__Vibrio; s__tapetis
45658	0	0	1	0	0	k__Bacteria; p__Proteobacteria; c__Gammaproteobacteria; o__Vibrionales; f__Vibrionaceae; g__Vibrio; s__scophthalmi
29495	0	0	1	0	0	k__Bacteria; p__Proteobacteria; c__Gammaproteobacteria; o__Vibrionales; f__Vibrionaceae; g__Vibrio; s__navarrensis
2572923	0	0	1	0	0	k__Bacteria; p__Proteobacteria; c__Gammaproteobacteria; o__Vibrionales; f__Vibrionaceae; g__Vibrio; s__taketomensis
38293	0	0	2	0	0	k__Bacteria; p__Proteobacteria; c__Gammaproteobacteria; o__Vibrionales; f__Vibrionaceae; g__Photobacterium; s__damselae
1755811	0	0	1	0	0	k__Bacteria; p__Proteobacteria; c__Gammaproteobacteria; o__Vibrionales; f__Vibrionaceae; g__Paraphotobacterium; s__marinum
1709477	0	0	1	0	0	k__Bacteria; p__Proteobacteria; c__Gammaproteobacteria; o__Alteromonadales; f__Pseudoalteromonadaceae; g__Pseudoalteromonas; s__sp. R3
247523	0	0	1	0	0	k__Bacteria; p__Proteobacteria; c__Gammaproteobacteria; o__Alteromonadales; f__Pseudoalteromonadaceae; g__Pseudoalteromonas; s__aliena
874454	0	0	1	0	0	k__Bacteria; p__Proteobacteria; c__Gammaproteobacteria; o__Alteromonadales; f__Pseudoalteromonadaceae; g__Pseudoalteromonas; s__arabiensis
161398	0	0	1	0	0	k__Bacteria; p__Proteobacteria; c__Gammaproteobacteria; o__Alteromonadales; f__Pseudoalteromonadaceae; g__Pseudoalteromonas; s__phenolica
394751	0	0	1	0	0	k__Bacteria; p__Proteobacteria; c__Gammaproteobacteria; o__Alteromonadales; f__Pseudoalteromonadaceae; g__Pseudoalteromonas; s__arctica
298657	0	0	1	0	0	k__Bacteria; p__Proteobacteria; c__Gammaproteobacteria; o__Alteromonadales; f__Pseudoalteromonadaceae; g__Pseudoalteromonas; s__spongiae
151081	0	0	1	0	0	k__Bacteria; p__Proteobacteria; c__Gammaproteobacteria; o__Alteromonadales; f__Pseudoalteromonadaceae; g__Pseudoalteromonas; s__ruthenica
22	0	0	2	0	0	k__Bacteria; p__Proteobacteria; c__Gammaproteobacteria; o__Alteromonadales; f__Shewanellaceae; g__Shewanella; s__
2029986	0	0	1	0	0	k__Bacteria; p__Proteobacteria; c__Gammaproteobacteria; o__Alteromonadales; f__Shewanellaceae; g__Shewanella; s__sp. WE21
715451	0	0	1	0	0	k__Bacteria; p__Proteobacteria; c__Gammaproteobacteria; o__Alteromonadales; f__Alteromonadaceae; g__Alteromonas; s__naphthalenivorans
914153	0	0	1	0	0	k__Bacteria; p__Proteobacteria; c__Gammaproteobacteria; o__Alteromonadales; f__Alteromonadaceae; g__Salinimonas; s__lutimaris
28229	0	0	1	0	0	k__Bacteria; p__Proteobacteria; c__Gammaproteobacteria; o__Alteromonadales; f__Colwelliaceae; g__Colwellia; s__psychrerythraea
1816218	0	0	1	0	0	k__Bacteria; p__Proteobacteria; c__Gammaproteobacteria; o__Alteromonadales; f__Colwelliaceae; g__Colwellia; s__sp. PAMC 20917
90736	0	0	2	0	0	k__Bacteria; p__Proteobacteria; c__Gammaproteobacteria; o__Alteromonadales; f__Moritellaceae; g__Moritella; s__marina
44012	0	0	1	0	0	k__Bacteria; p__Proteobacteria; c__Gammaproteobacteria; o__Alteromonadales; f__Ferrimonadaceae; g__Ferrimonas; s__balearica
75984	0	0	1	0	0	k__Bacteria; p__Proteobacteria; c__Gammaproteobacteria; o__Pasteurellales; f__Pasteurellaceae; g__Mannheimia; s__
111844	0	0	1	0	0	k__Bacteria; p__Proteobacteria; c__Gammaproteobacteria; o__Pasteurellales; f__Pasteurellaceae; g__Mannheimia; s__pernigra
2778911	0	0	1	0	0	k__Bacteria; p__Proteobacteria; c__Gammaproteobacteria; o__Pasteurellales; f__Pasteurellaceae; g__Rodentibacter; s__sp. DSM 111151
715	0	0	1	0	0	k__Bacteria; p__Proteobacteria; c__Gammaproteobacteria; o__Pasteurellales; f__Pasteurellaceae; g__Actinobacillus; s__pleuropneumoniae
34067	0	0	1	0	0	k__Bacteria; p__Proteobacteria; c__Gammaproteobacteria; o__Thiotrichales; f__Piscirickettsiaceae; g__Cycloclasticus; s__
648	0	0	2	0	0	k__Bacteria; p__Proteobacteria; c__Gammaproteobacteria; o__Aeromonadales; f__Aeromonadaceae; g__Aeromonas; s__caviae
447471	0	0	1	0	0	k__Bacteria; p__Proteobacteria; c__Gammaproteobacteria; o__Cellvibrionales; f__Cellvibrionaceae; g__Simiduia; s__agarivorans
452	0	0	1	0	0	k__Bacteria; p__Proteobacteria; c__Gammaproteobacteria; o__Legionellales; f__Legionellaceae; g__Legionella; s__spiritensis
45067	0	0	1	0	0	k__Bacteria; p__Proteobacteria; c__Gammaproteobacteria; o__Legionellales; f__Legionellaceae; g__Legionella; s__lansingensis
29423	0	0	1	0	0	k__Bacteria; p__Proteobacteria; c__Gammaproteobacteria; o__Legionellales; f__Legionellaceae; g__Legionella; s__oakridgensis
936476	0	0	1	0	0	k__Bacteria; p__Proteobacteria; c__Gammaproteobacteria; o__Oceanospirillales; f__Oceanospirillaceae; g__Marinomonas; s__posidonica
261964	0	0	1	0	0	k__Bacteria; p__Proteobacteria; c__Gammaproteobacteria; o__Oceanospirillales; f__Kangiellaceae; g__Kangiella; s__koreensis
2049332	0	0	1	0	0	k__Bacteria; p__Proteobacteria; c__Gammaproteobacteria; o__Methylococcales; f__Methylococcaceae; g__Methylomicrobium; s__sp. wino1
95641	0	0	1	0	0	k__Bacteria; p__Proteobacteria; c__Gammaproteobacteria; o__Methylococcales; f__Methylococcaceae; g__Methylotuvimicrobium; s__buryatense
1196095	0	0	1	0	0	k__Bacteria; p__Proteobacteria; c__Gammaproteobacteria; o__Orbales; f__Orbaceae; g__Gilliamella; s__apicola
412965	0	0	1	0	0	k__Bacteria; p__Proteobacteria; c__Gammaproteobacteria; o__Orbales; f__Orbaceae; g__Candidatus Vesicomyosocius; s__okutanii
28200	0	0	2	0	0	k__Bacteria; p__Proteobacteria; c__Epsilonproteobacteria; o__Campylobacterales; f__Campylobacteraceae; g__Aliarcobacter; s__skirrowii
255507	0	0	1	0	0	k__Bacteria; p__Proteobacteria; c__Epsilonproteobacteria; o__Campylobacterales; f__Campylobacteraceae; g__Aliarcobacter; s__cibarius
2321114	0	0	1	0	0	k__Bacteria; p__Proteobacteria; c__Epsilonproteobacteria; o__Campylobacterales; f__Campylobacteraceae; g__Malaciobacter; s__
1462615	0	0	1	0	0	k__Bacteria; p__Proteobacteria; c__Epsilonproteobacteria; o__Campylobacterales; f__Campylobacteraceae; g__Halarcobacter; s__ebronensis
2517362	0	0	1	0	0	k__Bacteria; p__Proteobacteria; c__Epsilonproteobacteria; o__Campylobacterales; f__Campylobacteraceae; g__Campylobacter; s__sp. CCUG 57310
522485	0	0	1	0	0	k__Bacteria; p__Proteobacteria; c__Epsilonproteobacteria; o__Campylobacterales; f__Campylobacteraceae; g__Campylobacter; s__avium
827	0	0	1	0	0	k__Bacteria; p__Proteobacteria; c__Epsilonproteobacteria; o__Campylobacterales; f__Campylobacteraceae; g__Campylobacter; s__ureolyticus
66821	0	0	1	0	0	k__Bacteria; p__Proteobacteria; c__Epsilonproteobacteria; o__Campylobacterales; f__Campylobacteraceae; g__Sulfurospirillum; s__multivorans
138563	0	0	1	0	0	k__Bacteria; p__Proteobacteria; c__Epsilonproteobacteria; o__Campylobacterales; f__Helicobacteraceae; g__Helicobacter; s__cetorum
37372	0	0	1	0	0	k__Bacteria; p__Proteobacteria; c__Epsilonproteobacteria; o__Campylobacterales; f__Helicobacteraceae; g__Helicobacter; s__bilis
2590022	0	0	1	0	0	k__Bacteria; p__Proteobacteria; c__Epsilonproteobacteria; o__Campylobacterales; f__Thiovulaceae; g__Sulfurimonas; s__sp. GYSZ_1
45656	0	0	1	0	0	k__Bacteria; p__Proteobacteria; c__Deltaproteobacteria; o__Desulfobacterales; f__Desulfobacteraceae; g__Desulfonema; s__limicola
947919	0	0	1	0	0	k__Bacteria; p__Proteobacteria; c__Deltaproteobacteria; o__Desulfobacterales; f__Desulfobacteraceae; g__Desulfosarcina; s__widdelii
2569541	0	0	1	0	0	k__Bacteria; p__Proteobacteria; c__Deltaproteobacteria; o__Desulfobacterales; f__Desulfobulbaceae; g__Desulfopila; s__sp. IMCC35005
56	0	0	1	0	0	k__Bacteria; p__Proteobacteria; c__Deltaproteobacteria; o__Myxococcales; f__Polyangiaceae; g__Sorangium; s__cellulosum
84405	0	0	1	0	0	k__Bacteria; p__Proteobacteria; c__Deltaproteobacteria; o__Desulfurellales; f__Desulfurellaceae; g__Hippea; s__maritima
803	0	0	1	0	0	k__Bacteria; p__Proteobacteria; c__Alphaproteobacteria; o__Hyphomicrobiales; f__Bartonellaceae; g__Bartonella; s__quintana
774	0	0	1	0	0	k__Bacteria; p__Proteobacteria; c__Alphaproteobacteria; o__Hyphomicrobiales; f__Bartonellaceae; g__Bartonella; s__bacilliformis
33045	0	0	1	0	0	k__Bacteria; p__Proteobacteria; c__Alphaproteobacteria; o__Hyphomicrobiales; f__Bartonellaceae; g__Bartonella; s__grahamii
1437360	0	0	1	0	0	k__Bacteria; p__Proteobacteria; c__Alphaproteobacteria; o__Hyphomicrobiales; f__Bradyrhizobiaceae; g__Bradyrhizobium; s__erythrophlei
1325090	0	0	1	0	0	k__Bacteria; p__Proteobacteria; c__Alphaproteobacteria; o__Hyphomicrobiales; f__Bradyrhizobiaceae; g__Bradyrhizobium; s__guangdongense
39645	0	0	1	0	0	k__Bacteria; p__Proteobacteria; c__Alphaproteobacteria; o__Hyphomicrobiales; f__Phyllobacteriaceae; g__Mesorhizobium; s__ciceri
2082387	0	0	1	0	0	k__Bacteria; p__Proteobacteria; c__Alphaproteobacteria; o__Hyphomicrobiales; f__Phyllobacteriaceae; g__Mesorhizobium; s__sp. Pch-S
2528642	0	0	1	0	0	k__Bacteria; p__Proteobacteria; c__Alphaproteobacteria; o__Hyphomicrobiales; f__Lichenihabitantaceae; g__Lichenihabitans; s__psoromatis
571256	0	0	1	0	0	k__Bacteria; p__Proteobacteria; c__Alphaproteobacteria; o__Hyphomicrobiales; f__Brucellaceae; g__Brucella; s__pituitosa
2789216	0	0	1	0	0	k__Bacteria; p__Proteobacteria; c__Alphaproteobacteria; o__Hyphomicrobiales; f__Xanthobacteraceae; g__Labrys; s__sp. KNU-23
944	0	0	1	0	0	k__Bacteria; p__Proteobacteria; c__Alphaproteobacteria; o__Rickettsiales; f__Anaplasmataceae; g__Ehrlichia; s__canis
2732593	0	0	1	0	0	k__Bacteria; p__Proteobacteria; c__Alphaproteobacteria; o__Rickettsiales; f__Anaplasmataceae; g__Wolbachia; s__endosymbiont of Ctenocephalides felis wCfeT
100901	0	0	1	0	0	k__Bacteria; p__Proteobacteria; c__Alphaproteobacteria; o__Rickettsiales; f__Anaplasmataceae; g__Wolbachia; s__endosymbiont of Onchocerca ochengi
125593	0	0	1	0	0	k__Bacteria; p__Proteobacteria; c__Alphaproteobacteria; o__Rickettsiales; f__Anaplasmataceae; g__Wolbachia; s__endosymbiont of Trichogramma pretiosum
949	0	0	1	0	0	k__Bacteria; p__Proteobacteria; c__Alphaproteobacteria; o__Rickettsiales; f__Anaplasmataceae; g__Anaplasma; s__platys
950	0	0	1	0	0	k__Bacteria; p__Proteobacteria; c__Alphaproteobacteria; o__Rickettsiales; f__Anaplasmataceae; g__Neorickettsia; s__risticii
780	0	0	1	0	0	k__Bacteria; p__Proteobacteria; c__Alphaproteobacteria; o__Rickettsiales; f__Rickettsiaceae; g__Rickettsia; s__
2115978	0	0	1	0	0	k__Bacteria; p__Proteobacteria; c__Alphaproteobacteria; o__Rickettsiales; f__Rickettsiaceae; g__Candidatus Phycorickettsia; s__trachydisci
33996	0	0	1	0	0	k__Bacteria; p__Proteobacteria; c__Alphaproteobacteria; o__Rhodospirillales; f__Acetobacteraceae; g__Gluconacetobacter; s__diazotrophicus
364410	0	0	1	0	0	k__Bacteria; p__Proteobacteria; c__Alphaproteobacteria; o__Rhodospirillales; f__Acetobacteraceae; g__Granulibacter; s__bethesdensis
2599296	0	0	1	0	0	k__Bacteria; p__Proteobacteria; c__Alphaproteobacteria; o__Rhodobacterales; f__Rhodobacteraceae; g__Qingshengfaniella; s__alkalisoli
53946	0	0	1	0	0	k__Bacteria; p__Proteobacteria; c__Alphaproteobacteria; o__Rhodobacterales; f__Rhodobacteraceae; g__Octadecabacter; s__arcticus
542	0	0	1	0	0	k__Bacteria; p__Proteobacteria; c__Alphaproteobacteria; o__Sphingomonadales; f__Sphingomonadaceae; g__Zymomonas; s__mobilis
160791	0	0	1	0	0	k__Bacteria; p__Proteobacteria; c__Alphaproteobacteria; o__Sphingomonadales; f__Sphingomonadaceae; g__Sphingomonas; s__wittichii
502682	0	0	1	0	0	k__Bacteria; p__Proteobacteria; c__Alphaproteobacteria; o__Sphingomonadales; f__Erythrobacteraceae; g__Aurantiacibacter; s__gangjinensis
86106	0	0	1	0	0	k__Bacteria; p__Proteobacteria; c__Alphaproteobacteria; o__Holosporales; f__Holosporaceae; g__; s__endosymbiont of Acanthamoeba sp. UWC8
305	0	0	1	0	0	k__Bacteria; p__Proteobacteria; c__Betaproteobacteria; o__Burkholderiales; f__Burkholderiaceae; g__Ralstonia; s__solanacearum
106590	0	0	1	0	0	k__Bacteria; p__Proteobacteria; c__Betaproteobacteria; o__Burkholderiales; f__Burkholderiaceae; g__Cupriavidus; s__necator
310575	0	0	1	0	0	k__Bacteria; p__Proteobacteria; c__Betaproteobacteria; o__Burkholderiales; f__Alcaligenaceae; g__Advenella; s__kashmirensis
160825	0	0	1	0	0	k__Bacteria; p__Proteobacteria; c__Betaproteobacteria; o__Burkholderiales; f__Comamonadaceae; g__Comamonas; s__koreensis
80842	0	0	1	0	0	k__Bacteria; p__Proteobacteria; c__Betaproteobacteria; o__Burkholderiales; f__Oxalobacteraceae; g__Herbaspirillum; s__rubrisubalbicans
332411	0	0	1	0	0	k__Bacteria; p__Proteobacteria; c__Betaproteobacteria; o__Neisseriales; f__Chromobacteriaceae; g__Aquitalea; s__magnusonii
2709396	0	0	1	0	0	k__Bacteria; p__Proteobacteria; c__Betaproteobacteria; o__Neisseriales; f__Neisseriaceae; g__Neisseria; s__sp. ZJ785
1853278	0	0	1	0	0	k__Bacteria; p__Proteobacteria; c__Betaproteobacteria; o__Neisseriales; f__Neisseriaceae; g__Neisseria; s__chenwenguii
2588536	0	0	1	0	0	k__Bacteria; p__Proteobacteria; c__Betaproteobacteria; o__Nitrosomonadales; f__Methylophilaceae; g__Candidatus Methylopumilus; s__universalis
44574	0	0	1	0	0	k__Bacteria; p__Proteobacteria; c__Betaproteobacteria; o__Nitrosomonadales; f__Nitrosomonadaceae; g__Nitrosomonas; s__communis
44577	0	0	1	0	0	k__Bacteria; p__Proteobacteria; c__Betaproteobacteria; o__Nitrosomonadales; f__Nitrosomonadaceae; g__Nitrosomonas; s__ureae
1576550	0	0	1	0	0	k__Bacteria; p__Proteobacteria; c__Betaproteobacteria; o__Nitrosomonadales; f__Nitrosomonadaceae; g__Candidatus Kinetoplastibacterium; s__sorsogonicusi
1232575	0	0	1	0	0	k__Bacteria; p__Proteobacteria; c__Acidithiobacillia; o__Acidithiobacillales; f__Acidithiobacillaceae; g__Acidithiobacillus; s__ferridurans
2026189	0	0	2	0	0	k__Bacteria; p__Firmicutes; c__Bacilli; o__Bacillales; f__Bacillaceae; g__Bacillus; s__albus
1402	0	0	1	0	0	k__Bacteria; p__Firmicutes; c__Bacilli; o__Bacillales; f__Bacillaceae; g__Bacillus; s__licheniformis
2592382	0	0	1	0	0	k__Bacteria; p__Firmicutes; c__Bacilli; o__Bacillales; f__Bacillaceae; g__Bacillus; s__sp. M4U3P1
2014076	0	0	1	0	0	k__Bacteria; p__Firmicutes; c__Bacilli; o__Bacillales; f__Bacillaceae; g__Bacillus; s__sp. FJAT-42376
1408	0	0	1	0	0	k__Bacteria; p__Firmicutes; c__Bacilli; o__Bacillales; f__Bacillaceae; g__Bacillus; s__pumilus
1925021	0	0	1	0	0	k__Bacteria; p__Firmicutes; c__Bacilli; o__Bacillales; f__Bacillaceae; g__Bacillus; s__haynesii
1476025	0	0	1	0	0	k__Bacteria; p__Firmicutes; c__Bacilli; o__Bacillales; f__Bacillaceae; g__Bacillus; s__vini
1547283	0	0	1	0	0	k__Bacteria; p__Firmicutes; c__Bacilli; o__Bacillales; f__Bacillaceae; g__Bacillus; s__weihaiensis
189381	0	0	1	0	0	k__Bacteria; p__Firmicutes; c__Bacilli; o__Bacillales; f__Bacillaceae; g__Bacillus; s__marisflavi
1664069	0	0	1	0	0	k__Bacteria; p__Firmicutes; c__Bacilli; o__Bacillales; f__Bacillaceae; g__Bacillus; s__glycinifermentans
2800373	0	0	1	0	0	k__Bacteria; p__Firmicutes; c__Bacilli; o__Bacillales; f__Bacillaceae; g__Priestia; s__
412384	0	0	1	0	0	k__Bacteria; p__Firmicutes; c__Bacilli; o__Bacillales; f__Bacillaceae; g__Priestia; s__aryabhattai
1402861	0	0	1	0	0	k__Bacteria; p__Firmicutes; c__Bacilli; o__Bacillales; f__Bacillaceae; g__Priestia; s__filamentosa
2070463	0	0	1	0	0	k__Bacteria; p__Firmicutes; c__Bacilli; o__Bacillales; f__Bacillaceae; g__Lysinibacillus; s__sp. SGAir0095
1407	0	0	1	0	0	k__Bacteria; p__Firmicutes; c__Bacilli; o__Bacillales; f__Bacillaceae; g__Peribacillus; s__psychrosaccharolyticus
228899	0	0	1	0	0	k__Bacteria; p__Firmicutes; c__Bacilli; o__Bacillales; f__Bacillaceae; g__Peribacillus; s__asahii
294699	0	0	2	0	0	k__Bacteria; p__Firmicutes; c__Bacilli; o__Bacillales; f__Bacillaceae; g__Anoxybacillus; s__amylolyticus
247480	0	0	1	0	0	k__Bacteria; p__Firmicutes; c__Bacilli; o__Bacillales; f__Bacillaceae; g__Anoxybacillus; s__caldiproteolyticus
665099	0	0	1	0	0	k__Bacteria; p__Firmicutes; c__Bacilli; o__Bacillales; f__Bacillaceae; g__Cytobacillus; s__oceanisediminis
859143	0	0	1	0	0	k__Bacteria; p__Firmicutes; c__Bacilli; o__Bacillales; f__Bacillaceae; g__Cytobacillus; s__kochii
2743000	0	0	1	0	0	k__Bacteria; p__Firmicutes; c__Bacilli; o__Bacillales; f__Bacillaceae; g__Salicibibacter; s__sp. NKC5-3
2213194	0	0	1	0	0	k__Bacteria; p__Firmicutes; c__Bacilli; o__Bacillales; f__Bacillaceae; g__Paraliobacillus; s__zengyii
129985	0	0	1	0	0	k__Bacteria; p__Firmicutes; c__Bacilli; o__Bacillales; f__Bacillaceae; g__Mesobacillus; s__jeotgali
2594883	0	0	1	0	0	k__Bacteria; p__Firmicutes; c__Bacilli; o__Bacillales; f__Bacillaceae; g__Radiobacillus; s__deserti
2663022	0	0	1	0	0	k__Bacteria; p__Firmicutes; c__Bacilli; o__Bacillales; f__Bacillaceae; g__Gracilibacillus; s__sp. SCU50
53344	0	0	1	0	0	k__Bacteria; p__Firmicutes; c__Bacilli; o__Bacillales; f__Staphylococcaceae; g__Staphylococcus; s__delphini
46126	0	0	1	0	0	k__Bacteria; p__Firmicutes; c__Bacilli; o__Bacillales; f__Staphylococcaceae; g__Staphylococcus; s__chromogenes
1295	0	0	1	0	0	k__Bacteria; p__Firmicutes; c__Bacilli; o__Bacillales; f__Staphylococcaceae; g__Staphylococcus; s__schleiferi
1294	0	0	1	0	0	k__Bacteria; p__Firmicutes; c__Bacilli; o__Bacillales; f__Staphylococcaceae; g__Staphylococcus; s__muscae
1654388	0	0	1	0	0	k__Bacteria; p__Firmicutes; c__Bacilli; o__Bacillales; f__Staphylococcaceae; g__Staphylococcus; s__schweitzeri
71237	0	0	1	0	0	k__Bacteria; p__Firmicutes; c__Bacilli; o__Bacillales; f__Staphylococcaceae; g__Mammaliicoccus; s__vitulinus
1461582	0	0	1	0	0	k__Bacteria; p__Firmicutes; c__Bacilli; o__Bacillales; f__Staphylococcaceae; g__Jeotgalicoccus; s__saudimassiliensis
2777983	0	0	2	0	0	k__Bacteria; p__Firmicutes; c__Bacilli; o__Bacillales; f__Paenibacillaceae; g__Paenibacillus; s__sp. JNUCC-31
1536769	0	0	1	0	0	k__Bacteria; p__Firmicutes; c__Bacilli; o__Bacillales; f__Paenibacillaceae; g__Paenibacillus; s__sp. FSL P4-0081
1566358	0	0	1	0	0	k__Bacteria; p__Firmicutes; c__Bacilli; o__Bacillales; f__Paenibacillaceae; g__Paenibacillus; s__sp. IHBB 10380
172713	0	0	2	0	0	k__Bacteria; p__Firmicutes; c__Bacilli; o__Bacillales; f__Paenibacillaceae; g__Paenibacillus; s__kribbensis
414771	0	0	1	0	0	k__Bacteria; p__Firmicutes; c__Bacilli; o__Bacillales; f__Paenibacillaceae; g__Paenibacillus; s__donghaensis
189425	0	0	1	0	0	k__Bacteria; p__Firmicutes; c__Bacilli; o__Bacillales; f__Paenibacillaceae; g__Paenibacillus; s__graminis
1616788	0	0	1	0	0	k__Bacteria; p__Firmicutes; c__Bacilli; o__Bacillales; f__Paenibacillaceae; g__Paenibacillus; s__bovis
55080	0	0	1	0	0	k__Bacteria; p__Firmicutes; c__Bacilli; o__Bacillales; f__Paenibacillaceae; g__Brevibacillus; s__
1393	0	0	3	0	0	k__Bacteria; p__Firmicutes; c__Bacilli; o__Bacillales; f__Paenibacillaceae; g__Brevibacillus; s__brevis
2507935	0	0	1	0	0	k__Bacteria; p__Firmicutes; c__Bacilli; o__Bacillales; f__Paenibacillaceae; g__Cohnella; s__abietis
1006155	0	0	1	0	0	k__Bacteria; p__Firmicutes; c__Bacilli; o__Bacillales; f__Listeriaceae; g__Listeria; s__weihenstephanensis
1578	0	0	1	0	0	k__Bacteria; p__Firmicutes; c__Bacilli; o__Lactobacillales; f__Lactobacillaceae; g__Lactobacillus; s__
147802	0	0	1	0	0	k__Bacteria; p__Firmicutes; c__Bacilli; o__Lactobacillales; f__Lactobacillaceae; g__Lactobacillus; s__iners
2695882	0	0	1	0	0	k__Bacteria; p__Firmicutes; c__Bacilli; o__Lactobacillales; f__Lactobacillaceae; g__Lactobacillus; s__sp. 3B(2020)
1218494	0	0	1	0	0	k__Bacteria; p__Firmicutes; c__Bacilli; o__Lactobacillales; f__Lactobacillaceae; g__Lactobacillus; s__helsingborgensis
1600	0	0	1	0	0	k__Bacteria; p__Firmicutes; c__Bacilli; o__Lactobacillales; f__Lactobacillaceae; g__Lactobacillus; s__acetotolerans
1587	0	0	1	0	0	k__Bacteria; p__Firmicutes; c__Bacilli; o__Lactobacillales; f__Lactobacillaceae; g__Lactobacillus; s__helveticus
1243	0	0	1	0	0	k__Bacteria; p__Firmicutes; c__Bacilli; o__Lactobacillales; f__Lactobacillaceae; g__Leuconostoc; s__
1246	0	0	1	0	0	k__Bacteria; p__Firmicutes; c__Bacilli; o__Lactobacillales; f__Lactobacillaceae; g__Leuconostoc; s__lactis
53444	0	0	2	0	0	k__Bacteria; p__Firmicutes; c__Bacilli; o__Lactobacillales; f__Lactobacillaceae; g__Fructilactobacillus; s__lindneri
1614	0	0	1	0	0	k__Bacteria; p__Firmicutes; c__Bacilli; o__Lactobacillales; f__Lactobacillaceae; g__Fructilactobacillus; s__fructivorans
1633	0	0	1	0	0	k__Bacteria; p__Firmicutes; c__Bacilli; o__Lactobacillales; f__Lactobacillaceae; g__Limosilactobacillus; s__vaginalis
89059	0	0	1	0	0	k__Bacteria; p__Firmicutes; c__Bacilli; o__Lactobacillales; f__Lactobacillaceae; g__Ligilactobacillus; s__acidipiscis
228229	0	0	1	0	0	k__Bacteria; p__Firmicutes; c__Bacilli; o__Lactobacillales; f__Lactobacillaceae; g__Ligilactobacillus; s__saerimneri
46254	0	0	1	0	0	k__Bacteria; p__Firmicutes; c__Bacilli; o__Lactobacillales; f__Lactobacillaceae; g__Oenococcus; s__
165096	0	0	1	0	0	k__Bacteria; p__Firmicutes; c__Bacilli; o__Lactobacillales; f__Lactobacillaceae; g__Weissella; s__koreensis
28038	0	0	1	0	0	k__Bacteria; p__Firmicutes; c__Bacilli; o__Lactobacillales; f__Lactobacillaceae; g__Latilactobacillus; s__curvatus
1345	0	0	1	0	0	k__Bacteria; p__Firmicutes; c__Bacilli; o__Lactobacillales; f__Streptococcaceae; g__Streptococcus; s__ferus
361101	0	0	1	0	0	k__Bacteria; p__Firmicutes; c__Bacilli; o__Lactobacillales; f__Streptococcaceae; g__Streptococcus; s__pseudoporcinus
315405	0	0	1	0	0	k__Bacteria; p__Firmicutes; c__Bacilli; o__Lactobacillales; f__Streptococcaceae; g__Streptococcus; s__gallolyticus
1311	0	0	1	0	0	k__Bacteria; p__Firmicutes; c__Bacilli; o__Lactobacillales; f__Streptococcaceae; g__Streptococcus; s__agalactiae
2592653	0	0	1	0	0	k__Bacteria; p__Firmicutes; c__Bacilli; o__Lactobacillales; f__Streptococcaceae; g__Lactococcus; s__sp. KACC 19320
1354	0	0	1	0	0	k__Bacteria; p__Firmicutes; c__Bacilli; o__Lactobacillales; f__Enterococcaceae; g__Enterococcus; s__hirae
33945	0	0	1	0	0	k__Bacteria; p__Firmicutes; c__Bacilli; o__Lactobacillales; f__Enterococcaceae; g__Enterococcus; s__avium
357441	0	0	1	0	0	k__Bacteria; p__Firmicutes; c__Bacilli; o__Lactobacillales; f__Enterococcaceae; g__Enterococcus; s__lactis
2562451	0	0	1	0	0	k__Bacteria; p__Firmicutes; c__Bacilli; o__Lactobacillales; f__Enterococcaceae; g__Vagococcus; s__sp. CF-49
2714947	0	0	1	0	0	k__Bacteria; p__Firmicutes; c__Bacilli; o__Lactobacillales; f__Enterococcaceae; g__Vagococcus; s__hydrophili
2751	0	0	3	0	0	k__Bacteria; p__Firmicutes; c__Bacilli; o__Lactobacillales; f__Carnobacteriaceae; g__Carnobacterium; s__maltaromaticum
2748	0	0	1	0	0	k__Bacteria; p__Firmicutes; c__Bacilli; o__Lactobacillales; f__Carnobacteriaceae; g__Carnobacterium; s__divergens
1911586	0	0	1	0	0	k__Bacteria; p__Firmicutes; c__Bacilli; o__Lactobacillales; f__Carnobacteriaceae; g__Marinilactibacillus; s__sp. 15R
31979	0	0	3	0	0	k__Bacteria; p__Firmicutes; c__Clostridia; o__Eubacteriales; f__Clostridiaceae; g__; s__
238834	0	0	3	0	0	k__Bacteria; p__Firmicutes; c__Clostridia; o__Eubacteriales; f__Clostridiaceae; g__Clostridium; s__estertheticum
1497	0	0	1	0	0	k__Bacteria; p__Firmicutes; c__Clostridia; o__Eubacteriales; f__Clostridiaceae; g__Clostridium; s__formicaceticum
2576307	0	0	2	0	0	k__Bacteria; p__Firmicutes; c__Clostridia; o__Eubacteriales; f__Clostridiaceae; g__Caloramator; s__sp. E03
89152	0	0	2	0	0	k__Bacteria; p__Firmicutes; c__Clostridia; o__Eubacteriales; f__Peptostreptococcaceae; g__Peptacetobacter; s__hiranonis
1511	0	0	1	0	0	k__Bacteria; p__Firmicutes; c__Clostridia; o__Eubacteriales; f__Peptostreptococcaceae; g__Acetoanaerobium; s__sticklandii
698776	0	0	4	0	0	k__Bacteria; p__Firmicutes; c__Clostridia; o__Eubacteriales; f__Lachnospiraceae; g__Cellulosilyticum; s__
572511	0	0	1	0	0	k__Bacteria; p__Firmicutes; c__Clostridia; o__Eubacteriales; f__Lachnospiraceae; g__Blautia; s__
40520	0	0	1	0	0	k__Bacteria; p__Firmicutes; c__Clostridia; o__Eubacteriales; f__Lachnospiraceae; g__Blautia; s__obeum
831	0	0	1	0	0	k__Bacteria; p__Firmicutes; c__Clostridia; o__Eubacteriales; f__Lachnospiraceae; g__Butyrivibrio; s__fibrisolvens
43305	0	0	1	0	0	k__Bacteria; p__Firmicutes; c__Clostridia; o__Eubacteriales; f__Lachnospiraceae; g__Butyrivibrio; s__proteoclasticus
649756	0	0	1	0	0	k__Bacteria; p__Firmicutes; c__Clostridia; o__Eubacteriales; f__Lachnospiraceae; g__Anaerostipes; s__hadrus
1564	0	0	1	0	0	k__Bacteria; p__Firmicutes; c__Clostridia; o__Eubacteriales; f__Peptococcaceae; g__Desulfotomaculum; s__ruminis
1833852	0	0	1	0	0	k__Bacteria; p__Firmicutes; c__Clostridia; o__Eubacteriales; f__Peptococcaceae; g__Desulfotomaculum; s__ferrireducens
142877	0	0	1	0	0	k__Bacteria; p__Firmicutes; c__Clostridia; o__Eubacteriales; f__Peptococcaceae; g__Desulfitobacterium; s__metallireducens
885581	0	0	1	0	0	k__Bacteria; p__Firmicutes; c__Clostridia; o__Eubacteriales; f__Peptococcaceae; g__Desulfosporosinus; s__acidiphilus
433296	0	0	1	0	0	k__Bacteria; p__Firmicutes; c__Clostridia; o__Eubacteriales; f__Clostridiales Family XIII. Incertae Sedis; g__Aminipila; s__butyrica
114527	0	0	1	0	0	k__Bacteria; p__Firmicutes; c__Clostridia; o__Eubacteriales; f__Clostridiales Family XIII. Incertae Sedis; g__Mogibacterium; s__diversum
2293317	0	0	2	0	0	k__Bacteria; p__Firmicutes; c__Clostridia; o__Eubacteriales; f__Syntrophomonadaceae; g__Candidatus Syntrophocurvum; s__alkaliphilum
2764325	0	0	1	0	0	k__Bacteria; p__Firmicutes; c__Clostridia; o__Eubacteriales; f__Eubacteriaceae; g__Eubacterium; s__sp. NSJ-61
2173034	0	0	1	0	0	k__Bacteria; p__Firmicutes; c__Clostridia; o__Eubacteriales; f__Vallitaleaceae; g__Petrocella; s__atlantisensis
184064	0	0	2	0	0	k__Bacteria; p__Firmicutes; c__Clostridia; o__Thermoanaerobacterales; f__Thermodesulfobiaceae; g__Thermodesulfobium; s__narugense
28895	0	0	1	0	0	k__Bacteria; p__Firmicutes; c__Clostridia; o__Thermoanaerobacterales; f__Thermoanaerobacterales Family III. Incertae Sedis; g__Thermoanaerobacterium; s__
55205	0	0	1	0	0	k__Bacteria; p__Firmicutes; c__Clostridia; o__Thermoanaerobacterales; f__Thermoanaerobacterales Family III. Incertae Sedis; g__Caldicellulosiruptor; s__owensensis
1754	0	0	1	0	0	k__Bacteria; p__Firmicutes; c__Clostridia; o__Thermoanaerobacterales; f__Thermoanaerobacteraceae; g__Thermoanaerobacter; s__
2751313	0	0	1	0	0	k__Bacteria; p__Firmicutes; c__Clostridia; o__Koleobacterales; f__Koleobacteraceae; g__Koleobacter; s__methoxysyntrophicus
1514105	0	0	1	0	0	k__Bacteria; p__Firmicutes; c__Erysipelotrichia; o__Erysipelotrichales; f__Erysipelotrichaceae; g__Erysipelothrix; s__larvae
1522	0	0	1	0	0	k__Bacteria; p__Firmicutes; c__Erysipelotrichia; o__Erysipelotrichales; f__Erysipelotrichaceae; g__Erysipelatoclostridium; s__[Clostridium] innocuum
2487118	0	0	1	0	0	k__Bacteria; p__Firmicutes; c__Erysipelotrichia; o__Erysipelotrichales; f__Erysipelotrichaceae; g__Intestinibaculum; s__porci
165779	0	0	1	0	0	k__Bacteria; p__Firmicutes; c__Tissierellia; o__Tissierellales; f__Peptoniphilaceae; g__Anaerococcus; s__
33037	0	0	1	0	0	k__Bacteria; p__Firmicutes; c__Tissierellia; o__Tissierellales; f__Peptoniphilaceae; g__Anaerococcus; s__vaginalis
2377	0	0	1	0	0	k__Bacteria; p__Firmicutes; c__Negativicutes; o__Selenomonadales; f__Sporomusaceae; g__Sporomusa; s__termitida
2161821	0	0	1	0	0	k__Bacteria; p__Firmicutes; c__Negativicutes; o__Veillonellales; f__Veillonellaceae; g__Dialister; s__massiliensis
905	0	0	1	0	0	k__Bacteria; p__Firmicutes; c__Negativicutes; o__Acidaminococcales; f__Acidaminococcaceae; g__Acidaminococcus; s__fermentans
171285	0	0	3	0	0	k__Bacteria; p__Tenericutes; c__Mollicutes; o__Mycoplasmatales; f__Mycoplasmataceae; g__Mycoplasmopsis; s__Mycoplasma glycophilum
2110	0	0	2	0	0	k__Bacteria; p__Tenericutes; c__Mollicutes; o__Mycoplasmatales; f__Mycoplasmataceae; g__Mycoplasmopsis; s__Mycoplasma agalactiae
2094	0	0	2	0	0	k__Bacteria; p__Tenericutes; c__Mollicutes; o__Mycoplasmatales; f__Mycoplasmataceae; g__Mycoplasmopsis; s__Mycoplasma arginini
171282	0	0	1	0	0	k__Bacteria; p__Tenericutes; c__Mollicutes; o__Mycoplasmatales; f__Mycoplasmataceae; g__Mycoplasmopsis; s__Mycoplasma columborale
114881	0	0	1	0	0	k__Bacteria; p__Tenericutes; c__Mollicutes; o__Mycoplasmatales; f__Mycoplasmataceae; g__Mycoplasmopsis; s__Mycoplasma columbinum
2683967	0	0	2	0	0	k__Bacteria; p__Tenericutes; c__Mollicutes; o__Mycoplasmatales; f__Mycoplasmataceae; g__Mycoplasma; s__sp. NEAQ87857
547987	0	0	1	0	0	k__Bacteria; p__Tenericutes; c__Mollicutes; o__Mycoplasmatales; f__Mycoplasmataceae; g__Mycoplasma; s__sp. Zaradi2
1749074	0	0	1	0	0	k__Bacteria; p__Tenericutes; c__Mollicutes; o__Mycoplasmatales; f__Mycoplasmataceae; g__Mycoplasma; s__sp. (ex Biomphalaria glabrata)
45361	0	0	1	0	0	k__Bacteria; p__Tenericutes; c__Mollicutes; o__Mycoplasmatales; f__Mycoplasmataceae; g__Mycoplasma; s__conjunctivae
171632	0	0	1	0	0	k__Bacteria; p__Tenericutes; c__Mollicutes; o__Mycoplasmatales; f__Mycoplasmataceae; g__Mycoplasma; s__ovis
141391	0	0	1	0	0	k__Bacteria; p__Tenericutes; c__Mollicutes; o__Mycoplasmatales; f__Mycoplasmataceae; g__Mycoplasma; s__Candidatus Mycoplasma haemolamae
2130	0	0	1	0	0	k__Bacteria; p__Tenericutes; c__Mollicutes; o__Mycoplasmatales; f__Mycoplasmataceae; g__Ureaplasma; s__urealyticum
134821	0	0	1	0	0	k__Bacteria; p__Tenericutes; c__Mollicutes; o__Mycoplasmatales; f__Mycoplasmataceae; g__Ureaplasma; s__parvum
295596	0	0	1	0	0	k__Bacteria; p__Tenericutes; c__Mollicutes; o__Mycoplasmatales; f__Mycoplasmataceae; g__Candidatus Hepatoplasma; s__crinochetorum
216932	0	0	3	0	0	k__Bacteria; p__Tenericutes; c__Mollicutes; o__Entomoplasmatales; f__Spiroplasmataceae; g__Spiroplasma; s__chinense
216935	0	0	1	0	0	k__Bacteria; p__Tenericutes; c__Mollicutes; o__Entomoplasmatales; f__Spiroplasmataceae; g__Spiroplasma; s__culicicola
324079	0	0	1	0	0	k__Bacteria; p__Tenericutes; c__Mollicutes; o__Entomoplasmatales; f__Spiroplasmataceae; g__Spiroplasma; s__tabanidicola
2145	0	0	1	0	0	k__Bacteria; p__Tenericutes; c__Mollicutes; o__Entomoplasmatales; f__Spiroplasmataceae; g__Spiroplasma; s__taiwanense
324078	0	0	1	0	0	k__Bacteria; p__Tenericutes; c__Mollicutes; o__Entomoplasmatales; f__Entomoplasmataceae; g__Mesoplasma; s__coleopterae
61635	0	0	1	0	0	k__Bacteria; p__Tenericutes; c__Mollicutes; o__Acholeplasmatales; f__Acholeplasmataceae; g__Acholeplasma; s__brassicae
1541959	0	0	1	0	0	k__Bacteria; p__Tenericutes; c__Mollicutes; o__Acholeplasmatales; f__Acholeplasmataceae; g__Candidatus Izimaplasma; s__sp. HR1
317936	0	0	1	0	0	k__Bacteria; p__Cyanobacteria; c__; o__Nostocales; f__Nostocaceae; g__Nostoc; s__sp. PCC 7107
1869241	0	0	1	0	0	k__Bacteria; p__Cyanobacteria; c__; o__Nostocales; f__Nostocaceae; g__Nostoc; s__sp. CENA543
1337936	0	0	1	0	0	k__Bacteria; p__Cyanobacteria; c__; o__Nostocales; f__Calotrichaceae; g__Calothrix; s__sp. 336/3
2005462	0	0	1	0	0	k__Bacteria; p__Cyanobacteria; c__; o__Nostocales; f__Calotrichaceae; g__Calothrix; s__sp. NIES-3974
1397703	0	0	1	0	0	k__Bacteria; p__Cyanobacteria; c__; o__Nostocales; f__Scytonemataceae; g__Brasilonema; s__sennae
1173027	0	0	1	0	0	k__Bacteria; p__Cyanobacteria; c__; o__Oscillatoriales; f__Microcoleaceae; g__Microcoleus; s__sp. PCC 7113
482564	0	0	1	0	0	k__Bacteria; p__Cyanobacteria; c__; o__Oscillatoriales; f__Oscillatoriaceae; g__Oscillatoria; s__nigro-viridis
38300	0	0	1	0	0	k__Bacteria; p__Actinobacteria; c__Actinomycetia; o__Streptomycetales; f__Streptomycetaceae; g__Streptomyces; s__pristinaespiralis
68278	0	0	1	0	0	k__Bacteria; p__Actinobacteria; c__Actinomycetia; o__Streptomycetales; f__Streptomycetaceae; g__Streptomyces; s__tuirus
54571	0	0	1	0	0	k__Bacteria; p__Actinobacteria; c__Actinomycetia; o__Streptomycetales; f__Streptomycetaceae; g__Streptomyces; s__venezuelae
161879	0	0	1	0	0	k__Bacteria; p__Actinobacteria; c__Actinomycetia; o__Corynebacteriales; f__Corynebacteriaceae; g__Corynebacterium; s__kroppenstedtii
169765	0	0	1	0	0	k__Bacteria; p__Actinobacteria; c__Actinomycetia; o__Corynebacteriales; f__Mycobacteriaceae; g__Mycobacterium; s__lacus
2736757	0	0	1	0	0	k__Bacteria; p__Actinobacteria; c__Actinomycetia; o__Propionibacteriales; f__Nocardioidaceae; g__Nocardioides; s__sp. MC1495
1686	0	0	1	0	0	k__Bacteria; p__Actinobacteria; c__Actinomycetia; o__Bifidobacteriales; f__Bifidobacteriaceae; g__Bifidobacterium; s__catenulatum
1663	0	0	1	0	0	k__Bacteria; p__Actinobacteria; c__Actinomycetia; o__Micrococcales; f__Micrococcaceae; g__Arthrobacter; s__
2708340	0	0	1	0	0	k__Bacteria; p__Actinobacteria; c__Actinomycetia; o__Actinomycetales; f__Actinomycetaceae; g__Actinomyces; s__sp. zg-332
56957	0	0	1	0	0	k__Bacteria; p__Deinococcus-Thermus; c__Deinococci; o__Thermales; f__Thermaceae; g__Thermus; s__oshimai
913107	0	0	1	0	0	k__Bacteria; p__Chloroflexi; c__Anaerolineae; o__Anaerolineales; f__Anaerolineaceae; g__Pelolinea; s__submarina
237	0	0	1	0	0	k__Bacteria; p__Bacteroidetes; c__Flavobacteriia; o__Flavobacteriales; f__Flavobacteriaceae; g__Flavobacterium; s__
1979344	0	0	1	0	0	k__Bacteria; p__Bacteroidetes; c__Flavobacteriia; o__Flavobacteriales; f__Flavobacteriaceae; g__Flavobacterium; s__sp. MDT1-60
1492737	0	0	2	0	0	k__Bacteria; p__Bacteroidetes; c__Flavobacteriia; o__Flavobacteriales; f__Flavobacteriaceae; g__Flavobacterium; s__gilvum
2547394	0	0	1	0	0	k__Bacteria; p__Bacteroidetes; c__Flavobacteriia; o__Flavobacteriales; f__Flavobacteriaceae; g__Flavobacterium; s__nackdongense
1355330	0	0	1	0	0	k__Bacteria; p__Bacteroidetes; c__Flavobacteriia; o__Flavobacteriales; f__Flavobacteriaceae; g__Flavobacterium; s__faecale
52959	0	0	1	0	0	k__Bacteria; p__Bacteroidetes; c__Flavobacteriia; o__Flavobacteriales; f__Flavobacteriaceae; g__Polaribacter; s__
1312072	0	0	1	0	0	k__Bacteria; p__Bacteroidetes; c__Flavobacteriia; o__Flavobacteriales; f__Flavobacteriaceae; g__Polaribacter; s__sp. SA4-12
1714849	0	0	2	0	0	k__Bacteria; p__Bacteroidetes; c__Flavobacteriia; o__Flavobacteriales; f__Flavobacteriaceae; g__Aquimarina; s__sp. AD10
256	0	0	1	0	0	k__Bacteria; p__Bacteroidetes; c__Flavobacteriia; o__Flavobacteriales; f__Flavobacteriaceae; g__Myroides; s__odoratus
57029	0	0	2	0	0	k__Bacteria; p__Bacteroidetes; c__Flavobacteriia; o__Flavobacteriales; f__Flavobacteriaceae; g__Psychroflexus; s__torquis
1336794	0	0	2	0	0	k__Bacteria; p__Bacteroidetes; c__Flavobacteriia; o__Flavobacteriales; f__Flavobacteriaceae; g__Formosa; s__sp. Hel1_33_131
444051	0	0	1	0	0	k__Bacteria; p__Bacteroidetes; c__Flavobacteriia; o__Flavobacteriales; f__Flavobacteriaceae; g__Mesoflavibacter; s__
411153	0	0	1	0	0	k__Bacteria; p__Bacteroidetes; c__Flavobacteriia; o__Flavobacteriales; f__Flavobacteriaceae; g__Gramella; s__forsetii
754429	0	0	1	0	0	k__Bacteria; p__Bacteroidetes; c__Flavobacteriia; o__Flavobacteriales; f__Flavobacteriaceae; g__Gilvibacter; s__sp. SZ-19
1239415	0	0	1	0	0	k__Bacteria; p__Bacteroidetes; c__Flavobacteriia; o__Flavobacteriales; f__Flavobacteriaceae; g__Dokdonia; s__sp. PRO95
1790137	0	0	1	0	0	k__Bacteria; p__Bacteroidetes; c__Flavobacteriia; o__Flavobacteriales; f__Flavobacteriaceae; g__Wenyingzhuangia; s__fucanilytica
2767188	0	0	1	0	0	k__Bacteria; p__Bacteroidetes; c__Flavobacteriia; o__Flavobacteriales; f__Flavobacteriaceae; g__Amniculibacterium; s__sp. G2-70
1736674	0	0	1	0	0	k__Bacteria; p__Bacteroidetes; c__Flavobacteriia; o__Flavobacteriales; f__Flavobacteriaceae; g__Algibacter; s__alginicilyticus
2039166	0	0	1	0	0	k__Bacteria; p__Bacteroidetes; c__Flavobacteriia; o__Flavobacteriales; f__Weeksellaceae; g__Chryseobacterium; s__sp. 6424
1241982	0	0	2	0	0	k__Bacteria; p__Bacteroidetes; c__Flavobacteriia; o__Flavobacteriales; f__Weeksellaceae; g__Chryseobacterium; s__nakagawai
2038776	0	0	2	0	0	k__Bacteria; p__Bacteroidetes; c__Flavobacteriia; o__Flavobacteriales; f__Weeksellaceae; g__Kaistella; s__flava (ex Peng et al. 2021)
1241979	0	0	1	0	0	k__Bacteria; p__Bacteroidetes; c__Flavobacteriia; o__Flavobacteriales; f__Weeksellaceae; g__Kaistella; s__carnis
1756149	0	0	1	0	0	k__Bacteria; p__Bacteroidetes; c__Flavobacteriia; o__Flavobacteriales; f__Weeksellaceae; g__Elizabethkingia; s__bruuniana
2710596	0	0	2	0	0	k__Bacteria; p__Bacteroidetes; c__Cytophagia; o__Cytophagales; f__Cytophagaceae; g__Spirosoma; s__sp. PL0136
2745947	0	0	1	0	0	k__Bacteria; p__Bacteroidetes; c__Cytophagia; o__Cytophagales; f__Cytophagaceae; g__Spirosoma; s__sp. KUDC1026
1178516	0	0	1	0	0	k__Bacteria; p__Bacteroidetes; c__Cytophagia; o__Cytophagales; f__Cytophagaceae; g__Spirosoma; s__montaniterrae
106	0	0	2	0	0	k__Bacteria; p__Bacteroidetes; c__Cytophagia; o__Cytophagales; f__Cytophagaceae; g__Runella; s__slithyformis
247481	0	0	1	0	0	k__Bacteria; p__Bacteroidetes; c__Cytophagia; o__Cytophagales; f__Amoebophilaceae; g__Candidatus Cardinium; s__hertigii
388413	0	0	1	0	0	k__Bacteria; p__Bacteroidetes; c__Cytophagia; o__Cytophagales; f__Cyclobacteriaceae; g__Algoriphagus; s__machipongonensis
1006	0	0	1	0	0	k__Bacteria; p__Bacteroidetes; c__Cytophagia; o__Cytophagales; f__Marivirgaceae; g__Marivirga; s__tractuosa
1538644	0	0	1	0	0	k__Bacteria; p__Bacteroidetes; c__Sphingobacteriia; o__Sphingobacteriales; f__Sphingobacteriaceae; g__Sphingobacterium; s__sp. ML3W
2713573	0	0	1	0	0	k__Bacteria; p__Bacteroidetes; c__Sphingobacteriia; o__Sphingobacteriales; f__Sphingobacteriaceae; g__Sphingobacterium; s__sp. DR205
2795738	0	0	1	0	0	k__Bacteria; p__Bacteroidetes; c__Sphingobacteriia; o__Sphingobacteriales; f__Sphingobacteriaceae; g__Sphingobacterium; s__sp. UDSM-2020
2789740	0	0	2	0	0	k__Bacteria; p__Bacteroidetes; c__Sphingobacteriia; o__Sphingobacteriales; f__Sphingobacteriaceae; g__Pedobacter; s__sp. JBR3-12
1727164	0	0	1	0	0	k__Bacteria; p__Bacteroidetes; c__Sphingobacteriia; o__Sphingobacteriales; f__Sphingobacteriaceae; g__Pedobacter; s__sp. PACM 27299
398053	0	0	1	0	0	k__Bacteria; p__Bacteroidetes; c__Sphingobacteriia; o__Sphingobacteriales; f__Sphingobacteriaceae; g__Mucilaginibacter; s__ginsenosidivorans
2740462	0	0	1	0	0	k__Bacteria; p__Bacteroidetes; c__Sphingobacteriia; o__Sphingobacteriales; f__Sphingobacteriaceae; g__Mucilaginibacter; s__mali
2764720	0	0	1	0	0	k__Bacteria; p__Bacteroidetes; c__Sphingobacteriia; o__Sphingobacteriales; f__Sphingobacteriaceae; g__Olivibacter; s__sp. SDN3
28116	0	0	1	0	0	k__Bacteria; p__Bacteroidetes; c__Bacteroidia; o__Bacteroidales; f__Bacteroidaceae; g__Bacteroides; s__ovatus
329854	0	0	1	0	0	k__Bacteria; p__Bacteroidetes; c__Bacteroidia; o__Bacteroidales; f__Bacteroidaceae; g__Bacteroides; s__intestinalis
2715212	0	0	1	0	0	k__Bacteria; p__Bacteroidetes; c__Bacteroidia; o__Bacteroidales; f__Bacteroidaceae; g__Bacteroides; s__sp. CBA7301
76123	0	0	1	0	0	k__Bacteria; p__Bacteroidetes; c__Bacteroidia; o__Bacteroidales; f__Prevotellaceae; g__Prevotella; s__enoeca
2585119	0	0	1	0	0	k__Bacteria; p__Bacteroidetes; c__Bacteroidia; o__Bacteroidales; f__Rikenellaceae; g__Alistipes; s__dispar
2751153	0	0	1	0	0	k__Bacteria; p__Bacteroidetes; c__Bacteroidia; o__Bacteroidales; f__Barnesiellaceae; g__Coprobacter; s__sp. 2CBH44
1168034	0	0	1	0	0	k__Bacteria; p__Bacteroidetes; c__Bacteroidia; o__Marinilabiliales; f__Prolixibacteraceae; g__Draconibacterium; s__orientale
2029983	0	0	1	0	0	k__Bacteria; p__Bacteroidetes; c__Chitinophagia; o__Chitinophagales; f__Chitinophagaceae; g__Chitinophaga; s__caeni
2703787	0	0	1	0	0	k__Bacteria; p__Bacteroidetes; c__Chitinophagia; o__Chitinophagales; f__Chitinophagaceae; g__Chitinophaga; s__agri
2676868	0	0	2	0	0	k__Bacteria; p__Bacteroidetes; c__Chitinophagia; o__Chitinophagales; f__Chitinophagaceae; g__Flavihumibacter; s__sp. SB-02
146919	0	0	1	0	0	k__Bacteria; p__Bacteroidetes; c__Saprospiria; o__Bacteroidetes Order II. Incertae sedis; f__Rhodothermaceae; g__Salinibacter; s__ruber
1974213	0	0	1	0	0	k__Bacteria; p__Chlorobi; c__Chlorobia; o__Chlorobiales; f__Chlorobiaceae; g__Prosthecochloris; s__sp. HL-130-GSB
203491	0	0	5	0	0	k__Bacteria; p__Fusobacteria; c__Fusobacteriia; o__Fusobacteriales; f__; g__; s__
203492	0	0	2	0	0	k__Bacteria; p__Fusobacteria; c__Fusobacteriia; o__Fusobacteriales; f__Fusobacteriaceae; g__; s__
285729	0	0	1	0	0	k__Bacteria; p__Fusobacteria; c__Fusobacteriia; o__Fusobacteriales; f__Fusobacteriaceae; g__Fusobacterium; s__canifelinum
167642	0	0	4	0	0	k__Bacteria; p__Fusobacteria; c__Fusobacteriia; o__Fusobacteriales; f__Fusobacteriaceae; g__Ilyobacter; s__polytropus
32067	0	0	3	0	0	k__Bacteria; p__Fusobacteria; c__Fusobacteriia; o__Fusobacteriales; f__Leptotrichiaceae; g__Leptotrichia; s__
712368	0	0	1	0	0	k__Bacteria; p__Fusobacteria; c__Fusobacteriia; o__Fusobacteriales; f__Leptotrichiaceae; g__Leptotrichia; s__sp. oral taxon 498
1785996	0	0	1	0	0	k__Bacteria; p__Fusobacteria; c__Fusobacteriia; o__Fusobacteriales; f__Leptotrichiaceae; g__Leptotrichia; s__sp. oral taxon 847
138851	0	0	1	0	0	k__Bacteria; p__Spirochaetes; c__Spirochaetia; o__Spirochaetales; f__Spirochaetaceae; g__Treponema; s__parvum
150829	0	0	1	0	0	k__Bacteria; p__Spirochaetes; c__Spirochaetia; o__Spirochaetales; f__Spirochaetaceae; g__Treponema; s__azotonutricium
215591	0	0	1	0	0	k__Bacteria; p__Spirochaetes; c__Spirochaetia; o__Spirochaetales; f__Spirochaetaceae; g__Treponema; s__caldarium
1539298	0	0	1	0	0	k__Bacteria; p__Spirochaetes; c__Spirochaetia; o__Spirochaetales; f__Spirochaetaceae; g__Treponema; s__sp. OMZ 838
2761123	0	0	1	0	0	k__Bacteria; p__Spirochaetes; c__Spirochaetia; o__Spirochaetales; f__Borreliaceae; g__Borrelia; s__maritima
139	0	0	1	0	0	k__Bacteria; p__Spirochaetes; c__Spirochaetia; o__Spirochaetales; f__Borreliaceae; g__Borreliella; s__burgdorferi
1674146	0	0	1	0	0	k__Bacteria; p__Spirochaetes; c__Spirochaetia; o__Spirochaetales; f__Borreliaceae; g__Borreliella; s__mayonii
171	0	0	1	0	0	k__Bacteria; p__Spirochaetes; c__Spirochaetia; o__Leptospirales; f__Leptospiraceae; g__Leptospira; s__
159	0	0	1	0	0	k__Bacteria; p__Spirochaetes; c__Spirochaetia; o__Brachyspirales; f__Brachyspiraceae; g__Brachyspira; s__hyodysenteriae
85991	0	0	1	0	0	k__Bacteria; p__Chlamydiae; c__Chlamydiia; o__Chlamydiales; f__Chlamydiaceae; g__Chlamydia; s__pecorum
362787	0	0	1	0	0	k__Bacteria; p__Chlamydiae; c__Chlamydiia; o__Parachlamydiales; f__Parachlamydiaceae; g__Candidatus Protochlamydia; s__amoebophila
389348	0	0	1	0	0	k__Bacteria; p__Chlamydiae; c__Chlamydiia; o__Parachlamydiales; f__Parachlamydiaceae; g__Candidatus Protochlamydia; s__naegleriophila
2527971	0	0	1	0	0	k__Bacteria; p__Planctomycetes; c__Planctomycetia; o__Planctomycetales; f__Planctomycetaceae; g__Gimesia; s__algae
174633	0	0	1	0	0	k__Bacteria; p__Planctomycetes; c__Candidatus Brocadiae; o__Candidatus Brocadiales; f__Candidatus Brocadiaceae; g__Candidatus Kuenenia; s__stuttgartiensis
1643951	0	0	1	0	0	k__Bacteria; p__Thermotogae; c__Thermotogae; o__Thermotogales; f__Thermotogaceae; g__Pseudothermotoga; s__
69499	0	0	1	0	0	k__Bacteria; p__Thermotogae; c__Thermotogae; o__Petrotogales; f__Petrotogaceae; g__Petrotoga; s__mobilis
1855912	0	0	1	0	0	k__Bacteria; p__Acidobacteria; c__Vicinamibacteria; o__; f__Vicinamibacteraceae; g__Luteitalea; s__pratensis
693075	0	0	1	0	0	k__Bacteria; p__Caldiserica; c__Caldisericia; o__Caldisericales; f__Caldisericaceae; g__Caldisericum; s__exile
35786	0	0	1	0	0	k__Bacteria; p__Coprothermobacterota; c__Coprothermobacteria; o__Coprothermobacterales; f__Coprothermobacteraceae; g__Coprothermobacter; s__proteolyticus
436114	0	0	1	0	0	k__Bacteria; p__Aquificae; c__Aquificae; o__Aquificales; f__Hydrogenothermaceae; g__Sulfurihydrogenibium; s__sp. YO3AOP1
83171	0	0	1	0	0	k__Archaea; p__Euryarchaeota; c__Methanococci; o__Methanococcales; f__Methanocaldococcaceae; g__Methanocaldococcus; s__fervens
2189	0	0	1	0	0	k__Archaea; p__Euryarchaeota; c__Methanococci; o__Methanococcales; f__Methanocaldococcaceae; g__Methanotorris; s__igneus
2607662	0	0	1	0	0	k__Archaea; p__Euryarchaeota; c__Methanococci; o__Methanococcales; f__Methanococcaceae; g__Methanofervidicoccus; s__sp. A16
2162	0	0	1	0	0	k__Archaea; p__Euryarchaeota; c__Methanobacteria; o__Methanobacteriales; f__Methanobacteriaceae; g__Methanobacterium; s__formicicum
2173	0	0	1	0	0	k__Archaea; p__Euryarchaeota; c__Methanobacteria; o__Methanobacteriales; f__Methanobacteriaceae; g__Methanobrevibacter; s__smithii
1609968	0	0	1	0	0	k__Archaea; p__Euryarchaeota; c__Methanobacteria; o__Methanobacteriales; f__Methanobacteriaceae; g__Methanobrevibacter; s__sp. YE315
2208	0	0	1	0	0	k__Archaea; p__Euryarchaeota; c__Methanomicrobia; o__Methanosarcinales; f__Methanosarcinaceae; g__Methanosarcina; s__barkeri
2214	0	0	1	0	0	k__Archaea; p__Euryarchaeota; c__Methanomicrobia; o__Methanosarcinales; f__Methanosarcinaceae; g__Methanosarcina; s__acetivorans
588898	0	0	1	0	0	k__Archaea; p__Euryarchaeota; c__Halobacteria; o__Natrialbales; f__Natrialbaceae; g__Haloterrigena; s__daqingensis
342949	0	0	1	0	0	k__Archaea; p__Euryarchaeota; c__Thermococci; o__Thermococcales; f__Thermococcaceae; g__Pyrococcus; s__sp. NA2
2663019	0	0	1	0	0	k__Archaea; p__Crenarchaeota; c__Thermoprotei; o__Sulfolobales; f__Sulfolobaceae; g__Sulfolobus; s__sp. E5-1-F
69656	0	0	2	0	0	k__Archaea; p__Crenarchaeota; c__Thermoprotei; o__Sulfolobales; f__Sulfolobaceae; g__Sulfurisphaera; s__ohwakuensis
56636	0	0	1	0	0	k__Archaea; p__Crenarchaeota; c__Thermoprotei; o__Desulfurococcales; f__Desulfurococcaceae; g__Aeropyrum; s__pernix
683846	0	0	1	0	0	k__Archaea; p__Crenarchaeota; c__Thermoprotei; o__Fervidicoccales; f__Fervidicoccaceae; g__Fervidicoccus; s__fontis
1959104	0	0	1	0	0	k__Archaea; p__Thaumarchaeota; c__; o__Nitrosopumilales; f__Nitrosopumilaceae; g__Nitrosopumilus; s__oxyclinae
2259673	0	0	1	0	0	k__Archaea; p__Thaumarchaeota; c__; o__Nitrosopumilales; f__Nitrosopumilaceae; g__Nitrosarchaeum; s__sp. AC2
1903276	0	0	1	0	0	k__Archaea; p__Thaumarchaeota; c__; o__Nitrosopumilales; f__Nitrosopumilaceae; g__Candidatus Nitrosotalea; s__okcheonensis
2303	0	0	1	0	0	k__Archaea; p__Candidatus Thermoplasmatota; c__Thermoplasmata; o__Thermoplasmatales; f__Thermoplasmataceae; g__Thermoplasma; s__acidophilum
97393	0	0	1	0	0	k__Archaea; p__Candidatus Thermoplasmatota; c__Thermoplasmata; o__Thermoplasmatales; f__Ferroplasmaceae; g__Ferroplasma; s__acidarmanus
212035	0	0	1	0	0	k__Viruses; p__Nucleocytoviricota; c__Megaviricetes; o__Imitervirales; f__Mimiviridae; g__Mimivirus; s__Acanthamoeba polyphaga mimivirus
1474867	0	0	1	0	0	k__Viruses; p__Nucleocytoviricota; c__Megaviricetes; o__Algavirales; f__Phycodnaviridae; g__; s__Aureococcus anophagefferens virus
10265	0	0	1	0	0	k__Viruses; p__Nucleocytoviricota; c__Pokkesviricetes; o__Chitovirales; f__Poxviridae; g__Capripoxvirus; s__
67082	0	0	1	0	0	k__Viruses; p__Nucleocytoviricota; c__Pokkesviricetes; o__Chitovirales; f__Poxviridae; g__Capripoxvirus; s__BeAn 58058 virus
1179664	0	0	1	0	0	k__Viruses; p__Nucleocytoviricota; c__Pokkesviricetes; o__Chitovirales; f__Poxviridae; g__Betaentomopoxvirus; s__Mythimna separata entomopoxvirus
83191	0	0	1	0	0	k__Viruses; p__Nucleocytoviricota; c__Pokkesviricetes; o__Chitovirales; f__Poxviridae; g__Deltaentomopoxvirus; s__Melanoplus sanguinipes entomopoxvirus
1985342	0	0	1	0	0	k__Viruses; p__Uroviricota; c__Caudoviricetes; o__Caudovirales; f__Myoviridae; g__Moonvirus; s__Citrobacter virus Moon
2560451	0	0	1	0	0	k__Viruses; p__Uroviricota; c__Caudoviricetes; o__Caudovirales; f__Myoviridae; g__Mosigvirus; s__Escherichia virus PhAPEC2

## Sheet: Relative_Abundance
Supplementary Table S4B. Species-level read relative abundace of bacterial OTUs in control and treatment samples.
OTU_ID	Species_Name	CR1	CR2	TR1	TR2	TR3
703	Plesiomonas shigelloides	0.000755002	0.00696864	0.318471	0.0277778	0.061436
33932	Bacillus cohnii	0.0142192	0.0418118	0.0387065	0.0277778	0.0525537
1290	Staphylococcus hominis	0.00100667	0	0	0.020202	0.0266469
1747	Cutibacterium acnes	0.00226501	0	0.000489956	0.040404	0.0251665
34062	Moraxella osloensis	0.00163584	0.00696864	0	0.0151515	0.0177646
1041504	Candidatus Arthromitus sp. SFB-rat-Yit	0.00151	0.00348432	0.000979912	0	0.0162842
1590	Lactiplantibacillus plantarum	0.0246634	0.00348432	0	0	0.015544
1282	Staphylococcus epidermidis	0.0011325	0.00348432	0.000979912	0.0126263	0.0148038
1921421	Geobacillus genomosp. 3	0.00100667	0	0	0.00757576	0.0125833
488447	Burkholderia contaminans	0.000251667	0	0.000979912	0.0176768	0.0111029
469	Acinetobacter	0.00226501	0	0.000489956	0.0151515	0.0111029
33889	Brevibacterium casei	0.00100667	0	0	0.00757576	0.0103627
29385	Staphylococcus saprophyticus	0.000125834	0	0	0.00505051	0.0103627
2715960	Bradyrhizobium sp. PSBB068	0.000755002	0	0	0.00252525	0.0096225
1279	Staphylococcus	0.00138417	0	0.00293974	0.00757576	0.00888231
2767842	Lactiplantibacillus	0.00742419	0	0	0	0.00814212
1301	Streptococcus	0.000629168	0	0.00146987	0.0606061	0.00666173
129337	Geobacillus	0.000125834	0	0.000489956	0.0227273	0.00666173
1491	Clostridium botulinum	0.00176167	0.00348432	0.00587947	0.00505051	0.00592154
9	Buchnera aphidicola	0.00201334	0.010453	0.00587947	0.00252525	0.00592154
2748320	Flavobacterium sp. P2-65	0.00163584	0.010453	0.00489956	0	0.00592154
286	Pseudomonas	0.00100667	0.00348432	0.0044096	0.0151515	0.00592154
29388	Staphylococcus capitis	0.000755002	0	0	0	0.00592154
1485	Clostridium	0.00100667	0.010453	0.0127389	0.00505051	0.00518135
1653831	Blattabacterium cuenoti	0.000629168	0.00348432	0.00342969	0.00757576	0.00518135
1386	Bacillus	0.000755002	0	0.00293974	0.00252525	0.00444115
1980674	Paenibacillus sp. Cedars	0.000503335	0	0.000489956	0	0.00444115
29378	Staphylococcus arlettae	0.000125834	0	0	0.00757576	0.00444115
33936	Aeribacillus pallidus	0.000377501	0.00348432	0	0.00252525	0.00444115
756892	Acinetobacter indicus	0.000755002	0.00348432	0	0	0.00444115
1280	Staphylococcus aureus	0.00125834	0.00348432	0.0044096	0	0.00370096
851	Fusobacterium nucleatum	0.000629168	0.00696864	0.00293974	0	0.00370096
2572594	Myroides fluvii	0.000377501	0	0.000489956	0	0.00370096
1716	Corynebacterium	0	0	0	0.00252525	0.00370096
400634	Lysinibacillus	0	0	0.000489956	0.00252525	0.00296077
59732	Chryseobacterium	0.000880836	0.00696864	0.000489956	0	0.00296077
1422	Geobacillus stearothermophilus	0	0	0	0.00505051	0.00296077
2005456	Fischerella sp. NIES-4106	0.000629168	0	0	0	0.00296077
2764326	Fusobacterium sp. NSJ-57	0.00100667	0	0.00538951	0.00252525	0.00222058
1922217	Erwinia Candidatus Erwinia haradaeae	0.000251667	0	0.00293974	0	0.00222058
1490	Paraclostridium bifermentans	0.000503335	0	0.00146987	0.00252525	0.00222058
2057808	Lacinutrix sp. Bg11-31	0.000125834	0	0.00146987	0.00252525	0.00222058
1520	Clostridium beijerinckii	0.000629168	0.00696864	0.000979912	0	0.00222058
343874	Empedobacter falsenii	0	0	0.000489956	0.00505051	0.00222058
1283	Staphylococcus haemolyticus	0	0	0.000489956	0.00252525	0.00222058
1219	Prochlorococcus marinus	0.000251667	0	0.000489956	0.00252525	0.00222058
339	Xanthomonas campestris	0.000125834	0	0.000489956	0	0.00222058
1206	Trichodesmium erythraeum	0.000251667	0.00696864	0.000489956	0	0.00222058
2143	Spiroplasma gladiatoris	0.000251667	0	0.000489956	0	0.00222058
1662285	Methylophilus sp. TWE2	0.000251667	0	0.000489956	0	0.00222058
379	Rhizobium	0	0	0	0.00505051	0.00222058
32008	Burkholderia	0.000125834	0	0	0.00252525	0.00222058
34105	Streptobacillus moniliformis	0	0	0	0	0.00222058
408	Methylorubrum extorquens	0	0.00348432	0	0	0.00222058
1624	Ligilactobacillus salivarius	0	0	0	0	0.00222058
729	Haemophilus parainfluenzae	0	0	0	0	0.00222058
986	Flavobacterium johnsoniae	0.000503335	0.00348432	0	0	0.00222058
44008	Enterococcus cecorum	0.000125834	0	0	0	0.00222058
2268451	Candidatus Pelagibacter sp. FZCC0015	0	0	0	0	0.00222058
848	Fusobacterium	0.000880836	0.00348432	0.0210681	0.00505051	0.00148038
1396	Bacillus cereus	0.00100667	0	0.00293974	0.00252525	0.00148038
1404	Priestia megaterium	0	0	0.00244978	0	0.00148038
2487072	Epilithonimonas vandammei	0.000377501	0	0.00195982	0.00252525	0.00148038
173	Leptospira interrogans	0.000125834	0	0.00195982	0	0.00148038
281120	Candidatus Amoebophilus asiaticus	0.00100667	0.00348432	0.00195982	0	0.00148038
1496	Clostridioides difficile	0.000629168	0.0139373	0.00146987	0.00252525	0.00148038
94869	Clostridium gasigenes	0.000125834	0	0.00146987	0	0.00148038
642	Aeromonas	0.00100667	0.010453	0.000979912	0.00252525	0.00148038
675	Vibrio cincinnatiensis	0	0	0.000979912	0	0.00148038
2151	Mesoplasma florum	0	0.00696864	0.000979912	0	0.00148038
2663009	Fusobacterium pseudoperiodonticum	0.000125834	0	0.000979912	0	0.00148038
2748319	Flavobacterium sp. I3-2	0.000503335	0	0.000979912	0	0.00148038
53345	Enterococcus durans	0.000251667	0	0.000979912	0	0.00148038
2507159	Clostridium sp. JN-9	0	0.00348432	0.000979912	0	0.00148038
36745	Clostridium saccharoperbutylacetonicum	0.000503335	0	0.000979912	0	0.00148038
108981	Acinetobacter schindleri	0	0	0.000489956	0.00505051	0.00148038
2816908	Sedimentibacter sp. zth1	0	0	0.000489956	0.00252525	0.00148038
2133	Spiroplasma citri	0	0	0.000489956	0	0.00148038
258	Sphingobacterium spiritivorum	0.000125834	0.010453	0.000489956	0	0.00148038
303	Pseudomonas putida	0	0	0.000489956	0	0.00148038
2058137	Polaribacter sp. ALD11	0.000125834	0	0.000489956	0	0.00148038
28903	Mycoplasmopsis Mycoplasma bovis	0	0	0.000489956	0	0.00148038
1032072	Malaciobacter molluscorum	0	0	0.000489956	0	0.00148038
849	Fusobacterium gonidiaformans	0.000125834	0	0.000489956	0	0.00148038
1351	Enterococcus faecalis	0.000125834	0	0.000489956	0	0.00148038
29341	Clostridium argentinense	0.000251667	0	0.000489956	0	0.00148038
1500960	Campylobacter sp. RM16704	0.000125834	0	0.000489956	0	0.00148038
1564138	Aliarcobacter faecis	0.000125834	0.00348432	0.000489956	0	0.00148038
40215	Acinetobacter junii	0.000125834	0	0	0.010101	0.00148038
129338	Geobacillus subterraneus	0	0	0	0.00757576	0.00148038
244734	Bradyrhizobium betae	0.000125834	0	0	0.00757576	0.00148038
333962	Providencia heimbachae	0.000503335	0	0	0.00252525	0.00148038
297	Hydrogenophilus thermoluteolus	0	0	0	0.00252525	0.00148038
38304	Corynebacterium tuberculostearicum	0	0	0	0.00252525	0.00148038
544	Citrobacter	0	0	0	0.00252525	0.00148038
374106	Campylobacter cuniculorum	0.000125834	0	0	0.00252525	0.00148038
108980	Acinetobacter ursingii	0.000377501	0	0	0.00252525	0.00148038
40214	Acinetobacter johnsonii	0.000503335	0	0	0.00252525	0.00148038
672	Vibrio vulnificus	0.000251667	0	0	0	0.00148038
1550240	Thermoanaerobacterium sp. RBIITD	0	0	0	0	0.00148038
1305	Streptococcus sanguinis	0.000251667	0	0	0	0.00148038
1302	Streptococcus gordonii	0	0	0	0	0.00148038
1292	Staphylococcus warneri	0.000251667	0	0	0	0.00148038
33028	Staphylococcus saccharolyticus	0.000503335	0	0	0	0.00148038
165695	Sphingobium	0.000251667	0	0	0	0.00148038
28454	Sphingobacterium multivorum	0.000125834	0	0	0	0.00148038
613	Serratia	0	0	0	0	0.00148038
2047	Rothia dentocariosa	0	0	0	0	0.00148038
2028343	Rhizobium sp. 11515TR	0.000125834	0	0	0	0.00148038
446679	Nostoc sphaeroides	0.000125834	0	0	0	0.00148038
264686	Nostoc edaphicum	0.000377501	0	0	0	0.00148038
29555	Mycoplasmopsis Mycoplasma canis	0	0	0	0	0.00148038
407	Methylobacterium	0	0	0	0	0.00148038
28087	Legionella sainthelensi	0.000125834	0	0	0	0.00148038
83655	Leclercia adecarboxylata	0	0	0	0	0.00148038
1604	Lactobacillus amylovorus	0	0	0	0	0.00148038
2382161	Halocella sp. SP3-1	0.000251667	0.00348432	0	0	0.00148038
14	Dictyoglomus thermophilum	0	0	0	0	0.00148038
1912216	Cutibacterium	0.000125834	0	0	0	0.00148038
1725	Corynebacterium xerosis	0	0	0	0	0.00148038
169679	Clostridium saccharobutylicum	0.000125834	0.00348432	0	0	0.00148038
253	Chryseobacterium indologenes	0.000251667	0.00348432	0	0	0.00148038
250	Chryseobacterium gleum	0.000251667	0	0	0	0.00148038
44000	Caldicellulosiruptor	0.000125834	0	0	0	0.00148038
38986	Acholeplasma palmae	0	0	0	0	0.00148038
1817405	Abyssicoccus albus	0	0	0	0	0.00148038
1492	Clostridium butyricum	0.00289417	0.00348432	0.0269476	0.00505051	0.000740192
850	Fusobacterium mortiferum	0.000125834	0	0.00881921	0	0.000740192
1502	Clostridium perfringens	0.000629168	0.010453	0.00734934	0.00252525	0.000740192
861	Fusobacterium ulcerans	0	0	0.00391965	0	0.000740192
237258	Cloacibacterium normanense	0	0	0.00244978	0.00252525	0.000740192
1507512	Romboutsia hominis	0.000251667	0	0.00244978	0	0.000740192
36845	Clostridium intestinale	0	0	0.00244978	0	0.000740192
46867	Clostridium chauvoei	0.000251667	0	0.00244978	0	0.000740192
562	Escherichia coli	0.000377501	0.00696864	0.00195982	0.00505051	0.000740192
585	Proteus vulgaris	0.000503335	0.00348432	0.00195982	0.00252525	0.000740192
316	Pseudomonas stutzeri	0.000251667	0	0.00195982	0	0.000740192
1296	Mammaliicoccus sciuri	0	0.00348432	0.00195982	0	0.000740192
64104	Bacillus pseudomycoides	0	0	0.00195982	0	0.000740192
44249	Paenibacillus	0	0.00348432	0.00146987	0.00252525	0.000740192
2656761	Apibacter sp. B2966	0	0	0.00146987	0.00252525	0.000740192
252967	Thiospirochaeta perfilievii	0.000125834	0	0.00146987	0	0.000740192
584609	Tenacibaculum jejuense	0.000251667	0	0.00146987	0	0.000740192
1308	Streptococcus thermophilus	0	0	0.00146987	0	0.000740192
1424294	Geosporobacter ferrireducens	0	0	0.00146987	0	0.000740192
996	Flavobacterium columnare	0.000251667	0.00696864	0.00146987	0	0.000740192
1561	Clostridium baratii	0.000377501	0.00348432	0.00146987	0	0.000740192
1324352	Chryseobacterium gallinarum	0	0.00348432	0.00146987	0	0.000740192
1428	Bacillus thuringiensis	0.000125834	0.00348432	0.00146987	0	0.000740192
492670	Bacillus velezensis	0	0	0.000979912	0.00252525	0.000740192
1581038	Bacillus sp. FJAT-22090	0.000125834	0	0.000979912	0.00252525	0.000740192
1794699	Thermodesulfobium acidiphilum	0	0.00348432	0.000979912	0	0.000740192
2099583	Streptomyces sp. ICC1	0.000125834	0	0.000979912	0	0.000740192
2044912	Staphylococcus debuckii	0.000125834	0	0.000979912	0	0.000740192
28453	Sphingobacterium	0.000125834	0	0.000979912	0	0.000740192
1888915	Polaribacter haliotis	0.000125834	0	0.000979912	0	0.000740192
554	Pectobacterium carotovorum	0	0	0.000979912	0	0.000740192
33033	Parvimonas micra	0	0	0.000979912	0	0.000740192
2547970	Parashewanella tropica	0	0	0.000979912	0	0.000740192
437897	Megamonas funiformis	0	0	0.000979912	0	0.000740192
1639	Listeria monocytogenes	0.000125834	0	0.000979912	0	0.000740192
210	Helicobacter pylori	0.000629168	0.00348432	0.000979912	0	0.000740192
1306519	Flavobacterium commune	0	0	0.000979912	0	0.000740192
45655	Desulfonema magnum	0	0	0.000979912	0	0.000740192
394958	Clostridium taeniosporum	0.000125834	0	0.000979912	0	0.000740192
84022	Clostridium aceticum	0	0	0.000979912	0	0.000740192
2713414	Chryseobacterium sp. POL2	0.000125834	0	0.000979912	0	0.000740192
194	Campylobacter	0.000251667	0.00348432	0.000979912	0	0.000740192
40216	Acinetobacter radioresistens	0.000125834	0	0.000979912	0	0.000740192
676	Vibrio fluvialis	0	0	0.000489956	0.00252525	0.000740192
34085	Riemerella anatipestifer	0.000125834	0	0.000489956	0.00252525	0.000740192
53346	Enterococcus mundtii	0	0	0.000489956	0.00252525	0.000740192
547	Enterobacter	0.000251667	0	0.000489956	0.00252525	0.000740192
2779445	Clostridium sp. 'deep sea'	0.000125834	0	0.000489956	0.00252525	0.000740192
651561	Chryseobacterium arthrosphaerae	0	0	0.000489956	0.00252525	0.000740192
374	Bradyrhizobium	0	0	0.000489956	0.00252525	0.000740192
47466	Borrelia miyamotoi	0.000377501	0	0.000489956	0.00252525	0.000740192
28152	Yersinia kristensenii	0	0	0.000489956	0	0.000740192
51229	Wigglesworthia glossinidia	0	0	0.000489956	0	0.000740192
1381081	Vibrio panuliri	0	0	0.000489956	0	0.000740192
662	Vibrio	0	0	0.000489956	0	0.000740192
29466	Veillonella parvula	0.000125834	0	0.000489956	0	0.000740192
981385	Thermotomaculum hydrothermale	0	0	0.000489956	0	0.000740192
2108365	Tepiditoga spiralis	0	0	0.000489956	0	0.000740192
754423	Tenacibaculum sp. SZ-18	0.000251667	0	0.000489956	0	0.000740192
2672570	Sulfurimonas sp. H1576	0.000251667	0	0.000489956	0	0.000740192
2099584	Streptomyces sp. ICC4	0	0	0.000489956	0	0.000740192
82348	Streptococcus pluranimalium	0	0	0.000489956	0	0.000740192
28035	Staphylococcus lugdunensis	0	0	0.000489956	0	0.000740192
1807358	Stanieria sp. NIES-3757	0	0	0.000489956	0	0.000740192
1571	Sporosarcina ureae	0.000125834	0	0.000489956	0	0.000740192
138074	Serratia symbiotica	0	0	0.000489956	0	0.000740192
2726954	Sarcina sp. JB2	0.000251667	0	0.000489956	0	0.000740192
28901	Salmonella enterica	0.000251667	0	0.000489956	0	0.000740192
2099786	Salicibibacter kimchii	0	0	0.000489956	0	0.000740192
1115758	Romboutsia ilealis	0.000251667	0	0.000489956	0	0.000740192
334543	Psychrobacter arcticus	0.000125834	0	0.000489956	0	0.000740192
43263	Pseudomonas alcaligenes	0.000377501	0.00348432	0.000489956	0	0.000740192
586	Providencia	0.000125834	0	0.000489956	0	0.000740192
28131	Prevotella intermedia	0	0	0.000489956	0	0.000740192
165179	Prevotella copri	0	0	0.000489956	0	0.000740192
2738844	Polaribacter sp. L12M9	0	0	0.000489956	0	0.000740192
1896175	Polaribacter sp. KT 15	0	0	0.000489956	0	0.000740192
1336804	Polaribacter sp. Hel1_33_78	0	0	0.000489956	0	0.000740192
230089	Photorhabdus thracensis	0.000125834	0	0.000489956	0	0.000740192
746691	Oceanobacillus kimchii	0.000251667	0	0.000489956	0	0.000740192
272131	Nostoc punctiforme	0	0	0.000489956	0	0.000740192
29553	Mycoplasmopsis Mycoplasma bovirhinis	0	0	0.000489956	0	0.000740192
1155739	Moorea producens	0	0.00348432	0.000489956	0	0.000740192
1080223	Malaciobacter pacificus	0.000125834	0	0.000489956	0	0.000740192
1898474	Macrococcus sp. IME1552	0	0	0.000489956	0	0.000740192
1245	Leuconostoc mesenteroides	0	0	0.000489956	0	0.000740192
1137606	Leptospira mayottensis	0	0	0.000489956	0	0.000740192
1359	Lactococcus cremoris	0.000125834	0	0.000489956	0	0.000740192
1486034	Lacinutrix venerupis	0	0	0.000489956	0	0.000740192
2282170	Kordia sp. SMS9	0	0	0.000489956	0	0.000740192
548	Klebsiella aerogenes	0	0	0.000489956	0	0.000740192
1615909	Geminocystis sp. NIES-3708	0.000125834	0	0.000489956	0	0.000740192
28110	Francisella philomiragia	0.000251667	0	0.000489956	0	0.000740192
299583	Francisella orientalis	0.000125834	0	0.000489956	0	0.000740192
1260	Finegoldia magna	0.000125834	0	0.000489956	0	0.000740192
561	Escherichia	0	0	0.000489956	0	0.000740192
225084	Erysipelothrix inopinata	0	0	0.000489956	0	0.000740192
1547	Erysipelatoclostridium ramosum	0.000251667	0	0.000489956	0	0.000740192
1805431	Enterococcus saigonensis	0	0	0.000489956	0	0.000740192
118060	Enterococcus rotai	0.000125834	0	0.000489956	0	0.000740192
208479	Enterocloster bolteae	0	0	0.000489956	0	0.000740192
550	Enterobacter cloacae	0.000125834	0	0.000489956	0	0.000740192
343403	Costertonia aggregata	0	0	0.000489956	0	0.000740192
1519	Clostridium tyrobutyricum	0.000125834	0.00348432	0.000489956	0	0.000740192
2483110	Clostridium sp. JN-1	0	0	0.000489956	0	0.000740192
2068654	Clostridium fermenticellae	0	0	0.000489956	0	0.000740192
546	Citrobacter freundii	0.000377501	0	0.000489956	0	0.000740192
878220	Chryseobacterium sp. StRB126	0	0	0.000489956	0	0.000740192
2487064	Chryseobacterium sp. G0186	0	0	0.000489956	0	0.000740192
2478663	Chryseobacterium sp. 3008163	0	0	0.000489956	0	0.000740192
535	Chromobacterium	0.000125834	0	0.000489956	0	0.000740192
29360	Cellulosilyticum lentocellum	0.000125834	0	0.000489956	0	0.000740192
197	Campylobacter jejuni	0.000125834	0	0.000489956	0	0.000740192
2042961	Campylobacter blaseri	0	0.00348432	0.000489956	0	0.000740192
35841	Caldibacillus thermoamylovorans	0.000125834	0	0.000489956	0	0.000740192
84378	Brachyspira murdochii	0.000125834	0	0.000489956	0	0.000740192
29521	Brachyspira	0.000125834	0	0.000489956	0	0.000740192
38323	Bartonella henselae	0	0	0.000489956	0	0.000740192
1423	Bacillus subtilis	0	0	0.000489956	0	0.000740192
2026191	Bacillus luti	0	0	0.000489956	0	0.000740192
28196	Arcobacter	0	0	0.000489956	0	0.000740192
156213	Anabaenopsis elenkinii	0	0	0.000489956	0	0.000740192
2697030	Aminipila sp. CBA3637	0	0	0.000489956	0	0.000740192
28198	Aliarcobacter cryaerophilus	0.000251667	0.00696864	0.000489956	0	0.000740192
101385	Aequorivita sublithincola	0	0	0.000489956	0	0.000740192
29430	Acinetobacter haemolyticus	0.000125834	0	0.000489956	0	0.000740192
1324350	Acinetobacter equi	0.000125834	0	0.000489956	0	0.000740192
202950	Acinetobacter baylyi	0	0	0.000489956	0	0.000740192
32002	Achromobacter denitrificans	0	0	0.000489956	0	0.000740192
1677857	Acetivibrio saccincola	0.000251667	0	0.000489956	0	0.000740192
288965	Acetivibrio clariflavus	0	0	0.000489956	0	0.000740192
105219	Ralstonia mannitolilytica	0	0	0	0.010101	0.000740192
29394	Dolosigranulum pigrum	0.000125834	0	0	0.00757576	0.000740192
45972	Staphylococcus pasteuri	0	0	0	0.00505051	0.000740192
84377	Brachyspira intermedia	0	0	0	0.00505051	0.000740192
1382466	Winogradskyella sediminis	0.000125834	0	0	0.00252525	0.000740192
29497	Vibrio splendidus	0	0	0	0.00252525	0.000740192
1030157	Sphingomonas sp. KC8	0	0	0	0.00252525	0.000740192
1843368	Sphingobium sp. RAC03	0	0	0	0.00252525	0.000740192
2052660	Oceanobacillus zhaokaii	0	0	0	0.00252525	0.000740192
182710	Oceanobacillus iheyensis	0.000251667	0	0	0.00252525	0.000740192
1215031	Neobacillus thermocopriae	0.000125834	0	0	0.00252525	0.000740192
571913	Luteipulveratus mongoliensis	0	0	0	0.00252525	0.000740192
471223	Geobacillus sp. WCH70	0	0	0	0.00252525	0.000740192
247	Empedobacter brevis	0.000125834	0	0	0.00252525	0.000740192
2321403	Chryseolinea soli	0	0	0	0.00252525	0.000740192
201	Campylobacter lari	0	0	0	0.00252525	0.000740192
38875	Bacillus oleronius	0.000125834	0	0	0.00252525	0.000740192
2770551	Yimella sp. cx-51	0	0	0	0	0.000740192
263819	Yersinia aleksiciae	0.000125834	0	0	0	0.000740192
346	Xanthomonas citri	0	0	0	0	0.000740192
953	Wolbachia	0	0.00348432	0	0	0.000740192
2714949	Weissella sp. HDW19	0	0	0	0	0.000740192
84406	Virgibacillus	0.000125834	0	0	0	0.000740192
243899	Veillonella endosymbiont 'TC1' of Trimyema compressum	0	0	0	0	0.000740192
34072	Variovorax	0	0	0	0	0.000740192
51173	Ureibacillus thermosphaericus	0	0	0	0	0.000740192
401471	Undibacterium parvum	0	0	0	0	0.000740192
158	Treponema denticola	0.000125834	0	0	0	0.000740192
2099387	Tolypothrix sp. PCC 7910	0.000125834	0.00348432	0	0	0.000740192
51669	Tetragenococcus halophilus	0	0	0	0	0.000740192
1850252	Tenacibaculum todarodis	0	0	0	0	0.000740192
202747	Sulfurimonas autotrophica	0	0	0	0	0.000740192
83771	Succinivibrio dextrinosolvens	0	0	0	0	0.000740192
2742133	Streptomyces sp. NA02536	0	0	0	0	0.000740192
349971	Streptomyces sp. FR1	0	0	0	0	0.000740192
149016	Streptococcus urinalis	0.000251667	0	0	0	0.000740192
1940319	Streptococcus sp. DAT741	0	0	0	0	0.000740192
1341	Streptococcus ratti	0	0	0	0	0.000740192
102684	Streptococcus infantarius	0.000125834	0	0	0	0.000740192
2173853	Streptococcus chenjunshii	0.000125834	0	0	0	0.000740192
308354	Staphylococcus simiae	0	0.00348432	0	0	0.000740192
246432	Staphylococcus equorum	0.000251667	0	0	0	0.000740192
985762	Staphylococcus agnetis	0	0	0	0	0.000740192
1763363	Stanieria cyanobacterium endosymbiont of Rhopalodia gibberula	0	0	0	0	0.000740192
2136	Spiroplasma monobiae	0.000125834	0	0	0	0.000740192
216942	Spiroplasma litorale	0.000125834	0	0	0	0.000740192
216937	Spiroplasma floricola	0	0	0	0	0.000740192
2139	Spiroplasma clarkii	0	0.00348432	0	0	0.000740192
2711215	Sphingosinithalassobacter sp. zrk23	0	0	0	0	0.000740192
1517551	Sphingomonas sp. HMP6	0	0	0	0	0.000740192
2759526	Sphingomonas sp. DH-S5	0	0	0	0	0.000740192
1523415	Sphingomonas sp. AAP5	0	0	0	0	0.000740192
1010	Sphingobacterium mizutaii	0	0	0	0	0.000740192
2048654	Solibacillus sp. R5-41	0.000125834	0	0	0	0.000740192
382	Sinorhizobium meliloti	0	0	0	0	0.000740192
879274	Shinella sp. HZN7	0	0	0	0	0.000740192
60961	Shewanella woodyi	0	0	0	0	0.000740192
2059264	Shewanella sp. Pdp11	0	0	0	0	0.000740192
62322	Shewanella baltica	0.000125834	0	0	0	0.000740192
176292	Secundilactobacillus malefermentans	0	0	0	0	0.000740192
241244	Rummeliibacillus stabekisii	0	0	0	0	0.000740192
119	Rubinisphaera brasiliensis	0	0	0	0	0.000740192
396015	Rothia terrae	0.000125834	0	0	0	0.000740192
1267423	Roseivirga pacifica	0	0	0	0	0.000740192
301301	Roseburia hominis	0	0	0	0	0.000740192
1501226	Romboutsia	0	0	0	0	0.000740192
1906744	Rodentibacter heylii	0	0	0	0	0.000740192
337479	Rickettsia endosymbiont of Bemisia tabaci	0	0	0	0	0.000740192
2291939	Rhizobium sp. ZX09	0	0	0	0	0.000740192
329	Ralstonia pickettii	0	0	0	0	0.000740192
48736	Ralstonia	0	0	0	0	0.000740192
2733866	Psychrobacter sp. KCTC 72983	0	0	0	0	0.000740192
2320270	Pseudomonas sp. DG56-2	0	0	0	0	0.000740192
198620	Pseudomonas koreensis	0	0	0	0	0.000740192
584	Proteus mirabilis	0.000251667	0	0	0	0.000740192
1501268	Prochlorococcus sp. MIT 0604	0	0	0	0	0.000740192
1177574	Prevotella jejuni	0	0	0	0	0.000740192
2694930	Pontibacter pudoricolor	0.000251667	0	0	0	0.000740192
2777185	Pontibacillus sp. ALD_SL1	0.000125834	0	0	0	0.000740192
216465	Polaromonas naphthalenivorans	0	0	0	0	0.000740192
1526927	Planococcus sp. PAMC 21323	0.000125834	0	0	0	0.000740192
54304	Planktothrix	0	0	0	0	0.000740192
54005	Peptoniphilus harei	0	0	0	0	0.000740192
2578106	Pedobacter sp. KBS0701	0	0	0	0	0.000740192
1255	Pediococcus pentosaceus	0.000125834	0	0	0	0.000740192
1905730	Pectobacterium parmentieri	0	0	0	0	0.000740192
122277	Pectobacterium	0.000125834	0	0	0	0.000740192
293371	Paucilactobacillus oligofermentans	0	0	0	0	0.000740192
1193095	Paucilactobacillus hokkaidonensis	0	0	0	0	0.000740192
75105	Paraburkholderia caribensis	0	0	0	0	0.000740192
1406	Paenibacillus polymyxa	0	0	0	0	0.000740192
2109914	Ottowia oryzae	0	0	0	0	0.000740192
28251	Ornithobacterium rhinotracheale	0	0.00348432	0	0	0.000740192
82983	Obesumbacterium proteus	0	0	0	0	0.000740192
28072	Nostoc sp. PCC 7524	0	0.00696864	0	0	0.000740192
2576902	Nostoc sp. C052	0	0	0	0	0.000740192
319236	Nonlabens sediminis	0	0	0	0	0.000740192
1839	Nocardioides	0	0	0	0	0.000740192
1353976	Neochlamydia sp. S13	0	0	0	0	0.000740192
194197	Neisseria dentiae	0	0	0	0	0.000740192
2109	Mycoplasmopsis Mycoplasma synoviae	0	0	0	0	0.000740192
142650	Mycoplasmopsis Mycoplasma phocirhinis	0.000125834	0	0	0	0.000740192
171281	Mycoplasmopsis Mycoplasma citelli	0	0	0	0	0.000740192
2767358	Mycoplasmopsis	0	0	0	0	0.000740192
538220	Mycoplasma struthionis	0	0	0	0	0.000740192
754514	Mycoplasma sp. Mirounga ES2805-ORL	0	0	0	0	0.000740192
2120	Mycoplasma neurolyticum	0.000251667	0	0	0	0.000740192
111501	Muricauda ruestringensis	0	0	0	0	0.000740192
423349	Mucilaginibacter	0	0	0	0	0.000740192
476	Moraxella bovis	0	0	0	0	0.000740192
475	Moraxella	0	0	0	0	0.000740192
1981510	Monoglobus pectinilyticus	0.000125834	0	0	0	0.000740192
1270	Micrococcus luteus	0.000125834	0	0	0	0.000740192
1269	Micrococcus	0	0	0	0	0.000740192
349221	Micavibrio aeruginosavorus	0	0	0	0	0.000740192
569860	Methylovirgula ligni	0	0	0	0	0.000740192
158847	Megamonas hypermegale	0	0	0	0	0.000740192
191026	Maridesulfovibrio hydrothermalis	0	0	0	0	0.000740192
1622	Ligilactobacillus murinus	0	0	0	0	0.000740192
1605	Ligilactobacillus animalis	0	0	0	0	0.000740192
34021	Liberibacter Candidatus Liberibacter asiaticus	0	0	0	0	0.000740192
34029	Leptothrix cholodnii	0	0	0	0	0.000740192
174	Leptospira borgpetersenii	0	0	0	0	0.000740192
172	Leptospira biflexa	0	0	0	0	0.000740192
152331	Lentilactobacillus parabuchneri	0	0	0	0	0.000740192
45056	Legionella adelaidensis	0	0	0	0	0.000740192
1599	Latilactobacillus sakei	0	0	0	0	0.000740192
33959	Lactobacillus johnsonii	0	0	0	0	0.000740192
84030	Lacrimispora saccharolytica	0.000125834	0	0	0	0.000740192
983544	Lacinutrix sp. 5H-3-7-4	0	0	0	0	0.000740192
617123	Lachnoanaerobaculum umeaense	0	0	0	0	0.000740192
1218801	Kordia antarctica	0.000125834	0	0	0	0.000740192
2714952	Kinneretia sp. DAIF2	0.000125834	0	0	0	0.000740192
2749086	Hyphobacterium sp. CCMP332	0.000125834	0	0	0	0.000740192
89966	Hymenobacter	0	0	0	0	0.000740192
135569	Helicobacter apodemus	0	0	0	0	0.000740192
2497861	Halomonas sp. BC-M4-5	0	0	0	0	0.000740192
1897729	Halomonas aestuarii	0	0	0	0	0.000740192
663364	Halarcobacter bivalviorum	0	0	0	0	0.000740192
2331	Halanaerobium praevalens	0.000125834	0	0	0	0.000740192
735	Haemophilus parahaemolyticus	0	0	0	0	0.000740192
730	Haemophilus [Haemophilus] ducreyi	0.000251667	0	0	0	0.000740192
724	Haemophilus	0.000251667	0	0	0	0.000740192
738	Glaesserella parasuis	0.000125834	0	0	0	0.000740192
2291597	Gallaecimonas mangrovi	0	0	0	0	0.000740192
1542390	Francisella frigiditurris	0	0	0	0	0.000740192
262	Francisella	0.000125834	0	0	0	0.000740192
2594004	Formosa sediminum	0.000251667	0	0	0	0.000740192
2724135	Flavobacterium sp. CLA17	0	0	0	0	0.000740192
2201181	Flavobacterium sediminis	0.000125834	0	0	0	0.000740192
459526	Flavobacterium anhuiense	0.000251667	0	0	0	0.000740192
1803846	Flavivirga eckloniae	0	0	0	0	0.000740192
477680	Filimonas lacunae	0	0	0	0	0.000740192
1982626	Faecalibacillus intestinalis	0	0	0	0	0.000740192
41202	Ewingella americana	0	0	0	0	0.000740192
1736	Eubacterium limosum	0.000125834	0	0	0	0.000740192
39960	Erythrobacter litoralis	0.000125834	0	0	0	0.000740192
2714929	Erysipelothrix sp. HDW6B	0	0	0	0	0.000740192
379347	Epibacterium mobile	0	0	0	0	0.000740192
106592	Ensifer adhaerens	0	0	0	0	0.000740192
1628248	Empedobacter stercoris	0	0	0	0	0.000740192
59734	Empedobacter	0	0	0	0	0.000740192
1756150	Elizabethkingia ursingii	0	0	0	0	0.000740192
2583851	Elizabethkingia sp. JS20170427COW	0	0	0	0	0.000740192
1117645	Elizabethkingia anophelis	0	0	0	0	0.000740192
2591634	Echinicola sp. LN3S3	0	0	0	0	0.000740192
2499144	Devosia sp. 1566	0	0	0	0	0.000740192
79209	Desulfosporosinus meridiei	0	0	0	0	0.000740192
571177	Desulfosarcina alkanivorans	0	0	0	0	0.000740192
28223	Desulfobacula toluolica	0	0	0	0	0.000740192
980427	Deinococcus wulumuqiensis	0	0	0	0	0.000740192
310783	Deinococcus deserti	0	0	0	0	0.000740192
2599308	Crassaminicella sp. SY095	0.000251667	0	0	0	0.000740192
401472	Corynebacterium ureicelerivorans	0	0	0	0	0.000740192
38301	Corynebacterium minutissimum	0.000125834	0	0	0	0.000740192
1612	Companilactobacillus farciminis	0.000125834	0	0	0	0.000740192
392416	Companilactobacillus crustorum	0	0	0	0	0.000740192
2478912	Commensalibacter sp. AMU001	0	0	0	0	0.000740192
28228	Colwellia	0	0	0	0	0.000740192
1715691	Cognatishimia activa	0	0	0	0	0.000740192
1509	Clostridium sporogenes	0.000125834	0	0	0	0.000740192
1548	Clostridium scatologenes	0	0	0	0	0.000740192
1538	Clostridium ljungdahlii	0	0	0	0	0.000740192
2015076	Chryseobacterium sp. T16E-39	0.000125834	0	0	0	0.000740192
2487065	Chryseobacterium sp. G0201	0.000125834	0.00696864	0	0	0.000740192
1813611	Chryseobacterium cucumeris	0	0	0	0	0.000740192
83554	Chlamydia psittaci	0	0	0	0	0.000740192
83558	Chlamydia pneumoniae	0	0	0	0	0.000740192
79329	Chitinophaga pinensis	0.000125834	0	0	0	0.000740192
2708117	Capnocytophaga endodontalis	0	0	0	0	0.000740192
1806508	Candidatus Promineofilum breve	0	0	0	0	0.000740192
1070130	Candidatus Gullanella endobia	0	0	0	0	0.000740192
1505597	Candidatus Blochmannia Blochmannia endosymbiont of Camponotus (Colobopsis) obliquus	0	0	0	0	0.000740192
1031542	Campylobacter volucris	0	0	0	0	0.000740192
497724	Campylobacter subantarcticus	0	0	0	0	0.000740192
1660076	Campylobacter sp. RM12175	0	0	0	0	0.000740192
1965231	Campylobacter pinnipediorum	0	0	0	0	0.000740192
75658	Campylobacter lanienae	0	0	0	0	0.000740192
28898	Campylobacter helveticus	0	0	0	0	0.000740192
196	Campylobacter fetus	0	0	0	0	0.000740192
195	Campylobacter coli	0.000125834	0	0	0	0.000740192
291048	Caminibacter mediatlanticus	0	0	0	0	0.000740192
1653476	Caldimicrobium thiodismutans	0	0	0	0	0.000740192
31899	Caldicellulosiruptor bescii	0	0	0	0	0.000740192
152500	Burkholderia dolosa	0	0	0	0	0.000740192
2819349	Brevilactibacter sp. MC1595	0	0	0	0	0.000740192
1696	Brevibacterium	0.000251667	0	0	0	0.000740192
2796470	Brevibacillus sp. FJAT-54423	0	0	0	0	0.000740192
52584	Brachyspira pilosicoli	0.000125834	0	0	0	0.000740192
1287055	Brachyspira hampsonii	0.000251667	0	0	0	0.000740192
1842539	Bosea sp. RAC05	0	0	0	0	0.000740192
141	Borrelia parkeri	0	0	0	0	0.000740192
140	Borrelia hermsii	0.000125834	0	0	0	0.000740192
1316444	Blattabacterium sp. (Nauphoeta cinerea)	0	0	0	0	0.000740192
818	Bacteroides thetaiotaomicron	0.000125834	0	0	0	0.000740192
290053	Bacteroides helcogenes	0	0.00348432	0	0	0.000740192
246787	Bacteroides cellulosilyticus	0	0	0	0	0.000740192
2011012	Bacillus sp. FJAT-45348	0	0	0	0	0.000740192
2728853	Bacillus sp. CS13	0	0	0	0	0.000740192
1392	Bacillus anthracis	0	0	0	0	0.000740192
235559	Arsenophonus endosymbiont of Aleurodicus dispersus	0	0	0	0	0.000740192
1658671	Arsenicicoccus sp. oral taxon 190	0	0	0	0	0.000740192
28199	Arcobacter nitrofigilis	0.000125834	0	0	0	0.000740192
496057	Arachidicoccus ginsenosidivorans	0.000251667	0	0	0	0.000740192
2283318	Aquirhabdus parva	0	0	0	0	0.000740192
2736252	Aquimarina sp. TRL1	0.000125834	0	0	0	0.000740192
433286	Anaerocolumna cellulosilytica	0.000125834	0	0	0	0.000740192
2742131	Amycolatopsis sp. Hca4	0	0	0	0	0.000740192
233316	Alteromonas stellipolaris	0	0	0	0	0.000740192
199441	Alkalihalobacillus krulwichiae	0.000125834	0	0	0	0.000740192
373	Agrobacterium vitis	0	0	0	0	0.000740192
739	Aggregatibacter segnis	0	0	0	0	0.000740192
645	Aeromonas salmonicida	0	0	0	0	0.000740192
2494375	Aequorivita sp. H23M31	0	0	0	0	0.000740192
2722820	Actinomyces sp. ZJ34	0	0	0	0	0.000740192
2591108	Actinomadura sp. WMMA1423	0	0	0	0	0.000740192
1407071	Acinetobacter sp. TGL-Y2	0	0	0	0	0.000740192
1827285	Acinetobacter sp. MYb10	0	0	0	0	0.000740192
2715163	Acinetobacter lanii	0	0	0	0	0.000740192
471	Acinetobacter calcoaceticus	0.000125834	0.00348432	0	0	0.000740192
553814	Acidovorax carolinensis	0	0	0	0	0.000740192
1748	Acidipropionibacterium acidipropionici	0	0	0	0	0.000740192
33952	Acetobacterium woodii	0	0	0	0	0.000740192
1515	Acetivibrio thermocellus	0	0	0	0	0.000740192
2675796	Enterobacteriaceae endosymbiont of Plateumaris rustica	0	0	0	0	0.000740192
2675794	Enterobacteriaceae endosymbiont of Plateumaris consimilis	0	0	0	0	0.000740192
2675773	Enterobacteriaceae endosymbiont of Donacia cincticornis	0	0	0	0	0.000740192
856	Fusobacterium varium	0.000125834	0	0.00489956	0.00252525	0
67780	Edwardsiella ictaluri	0	0	0.00244978	0	0
1542	Clostridium novyi	0.000251667	0	0.00244978	0	0
666	Vibrio cholerae	0.000251667	0	0.00195982	0	0
167642	Ilyobacter polytropus	0	0	0.00195982	0	0
1216932	Clostridium bornimense	0.000125834	0	0.00195982	0	0
698776	Cellulosilyticum	0	0	0.00195982	0	0
216932	Spiroplasma chinense	0	0	0.00146987	0	0
371142	Sphingobacterium daejeonense	0.000125834	0	0.00146987	0	0
747	Pasteurella multocida	0.000251667	0	0.00146987	0	0
1505	Paeniclostridium sordellii	0.000251667	0.00348432	0.00146987	0	0
171285	Mycoplasmopsis Mycoplasma glycophilum	0	0	0.00146987	0	0
171284	Mycoplasmopsis Mycoplasma cynos	0	0.00348432	0.00146987	0	0
1855823	Macrococcus canis	0	0.00348432	0.00146987	0	0
32067	Leptotrichia	0	0	0.00146987	0	0
1583098	Fusobacterium hwasookii	0.000125834	0	0.00146987	0	0
1513	Clostridium tetani	0.000251667	0.00696864	0.00146987	0	0
1504	Clostridium septicum	0.000251667	0	0.00146987	0	0
1534	Clostridium kluyveri	0.000125834	0	0.00146987	0	0
238834	Clostridium estertheticum	0	0	0.00146987	0	0
254	Chryseobacterium indoltheticum	0.000125834	0.00696864	0.00146987	0	0
2005460	Chondrocystis sp. NIES-4102	0.000125834	0	0.00146987	0	0
2303332	Cellvibrio sp. KY-GH-1	0.00138417	0.00696864	0.00146987	0	0
2751	Carnobacterium maltaromaticum	0	0	0.00146987	0	0
1393	Brevibacillus brevis	0	0	0.00146987	0	0
1413	Bacillus cellulosilyticus	0.000125834	0	0.00146987	0	0
199	Campylobacter concisus	0.000251667	0.00348432	0.000979912	0.00505051	0
289435	Sphaerospermopsis kisseleviana	0	0	0.000979912	0.00252525	0
2654325	Flavobacterium sp. xlx-214	0.000125834	0	0.000979912	0.00252525	0
1465	Brevibacillus laterosporus	0	0	0.000979912	0.00252525	0
29552	Acholeplasma axanthum	0	0	0.000979912	0.00252525	0
630	Yersinia enterocolitica	0	0.00696864	0.000979912	0	0
669	Vibrio harveyi	0.000125834	0	0.000979912	0	0
154288	Turicibacter sanguinis	0.000125834	0	0.000979912	0	0
184064	Thermodesulfobium narugense	0	0	0.000979912	0	0
1883	Streptomyces	0.000251667	0	0.000979912	0	0
1307	Streptococcus suis	0	0.00696864	0.000979912	0	0
2710596	Spirosoma sp. PL0136	0	0	0.000979912	0	0
22	Shewanella	0	0	0.000979912	0	0
106	Runella slithyformis	0	0	0.000979912	0	0
57029	Psychroflexus torquis	0	0	0.000979912	0	0
294	Pseudomonas fluorescens	0.000125834	0	0.000979912	0	0
1849015	Pseudoarcobacter acticola	0.000251667	0	0.000979912	0	0
583	Proteus	0.000503335	0	0.000979912	0	0
1904463	Poseidonibacter lekithochrous	0.000125834	0	0.000979912	0	0
2686361	Polaribacter sp. L3A8	0	0.00348432	0.000979912	0	0
996801	Polaribacter reichenbachii	0.000125834	0	0.000979912	0	0
2218628	Photorhabdus laumondii	0	0.00348432	0.000979912	0	0
38293	Photobacterium damselae	0	0	0.000979912	0	0
89152	Peptacetobacter hiranonis	0	0	0.000979912	0	0
2789740	Pedobacter sp. JBR3-12	0	0	0.000979912	0	0
2777983	Paenibacillus sp. JNUCC-31	0	0	0.000979912	0	0
2707005	Paenibacillus lutimineralis	0	0.00348432	0.000979912	0	0
172713	Paenibacillus kribbensis	0	0	0.000979912	0	0
2094	Mycoplasmopsis Mycoplasma arginini	0	0	0.000979912	0	0
2110	Mycoplasmopsis Mycoplasma agalactiae	0	0	0.000979912	0	0
2683967	Mycoplasma sp. NEAQ87857	0	0	0.000979912	0	0
90736	Moritella marina	0	0	0.000979912	0	0
69965	Macrococcus	0.000125834	0	0.000979912	0	0
28031	Lysinibacillus fusiformis	0	0.00348432	0.000979912	0	0
1638	Listeria ivanovii	0	0.00348432	0.000979912	0	0
28183	Leptospira santarosai	0.000125834	0	0.000979912	0	0
2038776	Kaistella flava (ex Peng et al. 2021)	0	0	0.000979912	0	0
2350	Haliscomenobacter hydrossis	0.000125834	0	0.000979912	0	0
53444	Fructilactobacillus lindneri	0	0	0.000979912	0	0
1336794	Formosa sp. Hel1_33_131	0	0	0.000979912	0	0
1179672	Flavobacterium sp. KBS0721	0.000125834	0	0.000979912	0	0
1492737	Flavobacterium gilvum	0	0	0.000979912	0	0
2676868	Flavihumibacter sp. SB-02	0	0	0.000979912	0	0
779	Ehrlichia ruminantium	0.000125834	0.00348432	0.000979912	0	0
1716543	Clostridium thermarum	0.000125834	0	0.000979912	0	0
2320868	Clostridium sp. CT4	0.000125834	0	0.000979912	0	0
1494	Clostridium cochlearium	0.000125834	0	0.000979912	0	0
1488	Clostridium acetobutylicum	0.000125834	0	0.000979912	0	0
1241982	Chryseobacterium nakagawai	0	0	0.000979912	0	0
76594	Cellulophaga baltica	0.000125834	0	0.000979912	0	0
2293317	Candidatus Syntrophocurvum alkaliphilum	0	0	0.000979912	0	0
2576307	Caloramator sp. E03	0	0	0.000979912	0	0
138	Borrelia	0.000125834	0	0.000979912	0	0
816	Bacteroides	0.000125834	0	0.000979912	0	0
2026189	Bacillus albus	0	0	0.000979912	0	0
1054033	Arcobacter venerupis	0.000125834	0	0.000979912	0	0
1714849	Aquimarina sp. AD10	0	0	0.000979912	0	0
294699	Anoxybacillus amylolyticus	0	0	0.000979912	0	0
2736602	Anaerocolumna sp. CTTW	0.000125834	0.00348432	0.000979912	0	0
208226	Alkaliphilus metalliredigens	0.000251667	0	0.000979912	0	0
79880	Alkalihalobacillus clausii	0.000251667	0	0.000979912	0	0
28200	Aliarcobacter skirrowii	0	0	0.000979912	0	0
1355374	Aliarcobacter lanthieri	0.000125834	0	0.000979912	0	0
648	Aeromonas caviae	0	0	0.000979912	0	0
28187	Acetohalobium arabaticum	0.000125834	0	0.000979912	0	0
1313	Streptococcus pneumoniae	0	0	0.000489956	0.00757576	0
28037	Streptococcus mitis	0.000125834	0	0.000489956	0.00757576	0
2589986	Francisella sp. Scap27	0	0	0.000489956	0.00505051	0
2507161	Tissierella Tissierellia sp. JN-28	0	0.00348432	0.000489956	0.00252525	0
1303	Streptococcus oralis	0.000125834	0	0.000489956	0.00252525	0
182141	Pseudoalteromonas prydzensis	0	0	0.000489956	0.00252525	0
197482	Malaciobacter halophilus	0	0	0.000489956	0.00252525	0
1421	Lysinibacillus sphaericus	0.000503335	0	0.000489956	0.00252525	0
157687	Leptotrichia wadei	0.000377501	0	0.000489956	0.00252525	0
2653681	Lacinutrix sp. WUR7	0.000125834	0	0.000489956	0.00252525	0
66219	Lachnoclostridium phytofermentans	0.000125834	0	0.000489956	0.00252525	0
2546359	Gloeothece verrucosa	0	0	0.000489956	0.00252525	0
1501	Clostridium pasteurianum	0.000377501	0.00696864	0.000489956	0.00252525	0
59600	Cellulophaga algicola	0	0	0.000489956	0.00252525	0
1016	Capnocytophaga	0	0	0.000489956	0.00252525	0
1973486	Calothrix parasitica	0.000251667	0	0.000489956	0.00252525	0
1054034	Arcobacter cloacae	0	0	0.000489956	0.00252525	0
1935204	Aliarcobacter [Arcobacter] porcinus	0	0	0.000489956	0.00252525	0
654	Aeromonas veronii	0	0.00348432	0.000489956	0.00252525	0
542	Zymomonas mobilis	0	0	0.000489956	0	0
29485	Yersinia rohdei	0.000125834	0	0.000489956	0	0
633	Yersinia pseudotuberculosis	0	0	0.000489956	0	0
629	Yersinia	0	0	0.000489956	0	0
40576	Xenorhabdus bovienii	0	0	0.000489956	0	0
125593	Wolbachia endosymbiont of Trichogramma pretiosum	0	0	0.000489956	0	0
100901	Wolbachia endosymbiont of Onchocerca ochengi	0	0	0.000489956	0	0
2732593	Wolbachia endosymbiont of Ctenocephalides felis wCfeT	0	0	0.000489956	0	0
754409	Winogradskyella sp. PG-2	0.000125834	0	0.000489956	0	0
2686077	Winogradskyella forsetii	0.000125834	0.00696864	0.000489956	0	0
1790137	Wenyingzhuangia fucanilytica	0	0	0.000489956	0	0
165096	Weissella koreensis	0	0	0.000489956	0	0
1435069	Vibrio tritonius	0	0	0.000489956	0	0
52443	Vibrio tapetis	0	0	0.000489956	0	0
2572923	Vibrio taketomensis	0	0	0.000489956	0	0
2163016	Vibrio sp. dhg	0	0	0.000489956	0	0
2014742	Vibrio sp. 2521-89	0	0	0.000489956	0	0
45658	Vibrio scophthalmi	0	0	0.000489956	0	0
670	Vibrio parahaemolyticus	0	0	0.000489956	0	0
29495	Vibrio navarrensis	0	0	0.000489956	0	0
55601	Vibrio anguillarum	0.000251667	0	0.000489956	0	0
2571750	Vagococcus zengguangii	0.000125834	0.00348432	0.000489956	0	0
2562451	Vagococcus sp. CF-49	0	0	0.000489956	0	0
2714947	Vagococcus hydrophili	0	0	0.000489956	0	0
2130	Ureaplasma urealyticum	0	0	0.000489956	0	0
134821	Ureaplasma parvum	0	0	0.000489956	0	0
1539298	Treponema sp. OMZ 838	0	0	0.000489956	0	0
409322	Treponema pedis	0.000125834	0	0.000489956	0	0
138851	Treponema parvum	0	0	0.000489956	0	0
215591	Treponema caldarium	0	0	0.000489956	0	0
150829	Treponema azotonutricium	0	0	0.000489956	0	0
56957	Thermus oshimai	0	0	0.000489956	0	0
46541	Thermosipho melanesiensis	0.000125834	0	0.000489956	0	0
1517	Thermoanaerobacterium thermosaccharolyticum	0.000125834	0	0.000489956	0	0
28895	Thermoanaerobacterium	0	0	0.000489956	0	0
1754	Thermoanaerobacter	0	0	0.000489956	0	0
66821	Sulfurospirillum multivorans	0	0	0.000489956	0	0
2590022	Sulfurimonas sp. GYSZ_1	0	0	0.000489956	0	0
1176482	Sulfurimonas gotlandica	0.000125834	0.00348432	0.000489956	0	0
436114	Sulfurihydrogenibium sp. YO3AOP1	0	0	0.000489956	0	0
54571	Streptomyces venezuelae	0	0	0.000489956	0	0
68278	Streptomyces tuirus	0	0	0.000489956	0	0
38300	Streptomyces pristinaespiralis	0	0	0.000489956	0	0
361101	Streptococcus pseudoporcinus	0	0	0.000489956	0	0
315405	Streptococcus gallolyticus	0	0	0.000489956	0	0
1345	Streptococcus ferus	0	0	0.000489956	0	0
1311	Streptococcus agalactiae	0	0	0.000489956	0	0
1654388	Staphylococcus schweitzeri	0	0	0.000489956	0	0
1295	Staphylococcus schleiferi	0	0	0.000489956	0	0
2282419	Staphylococcus pseudoxylosus	0.000125834	0	0.000489956	0	0
214473	Staphylococcus nepalensis	0.00654335	0	0.000489956	0	0
1294	Staphylococcus muscae	0	0	0.000489956	0	0
53344	Staphylococcus delphini	0	0	0.000489956	0	0
46126	Staphylococcus chromogenes	0	0	0.000489956	0	0
2377	Sporomusa termitida	0	0	0.000489956	0	0
2745947	Spirosoma sp. KUDC1026	0	0	0.000489956	0	0
1178516	Spirosoma montaniterrae	0	0	0.000489956	0	0
216946	Spiroplasma turonicum	0.000125834	0	0.000489956	0	0
2145	Spiroplasma taiwanense	0	0	0.000489956	0	0
324079	Spiroplasma tabanidicola	0	0	0.000489956	0	0
2138	Spiroplasma poulsonii	0	0.00348432	0.000489956	0	0
216935	Spiroplasma culicicola	0	0	0.000489956	0	0
160791	Sphingomonas wittichii	0	0	0.000489956	0	0
2795738	Sphingobacterium sp. UDSM-2020	0	0	0.000489956	0	0
1538644	Sphingobacterium sp. ML3W	0	0	0.000489956	0	0
2713573	Sphingobacterium sp. DR205	0	0	0.000489956	0	0
56	Sorangium cellulosum	0	0	0.000489956	0	0
187101	Sneathia vaginalis	0.000125834	0	0.000489956	0	0
447471	Simiduia agarivorans	0	0	0.000489956	0	0
2029986	Shewanella sp. WE21	0	0	0.000489956	0	0
82996	Serratia plymuthica	0	0	0.000489956	0	0
1307839	Salinivirga cyanobacteriivorans	0.000125834	0	0.000489956	0	0
914153	Salinimonas lutimaris	0	0	0.000489956	0	0
146919	Salinibacter ruber	0	0	0.000489956	0	0
2743000	Salicibibacter sp. NKC5-3	0	0	0.000489956	0	0
2259595	Runella sp. HYN0085	0.000125834	0	0.000489956	0	0
2488810	Ruminiclostridium herbifermentans	0.000251667	0	0.000489956	0	0
2587852	Roseivivax sp. THAF30	0.000125834	0	0.000489956	0	0
2724150	Romboutsia sp. CE17	0.000251667	0	0.000489956	0	0
2778911	Rodentibacter sp. DSM 111151	0	0	0.000489956	0	0
33990	Rickettsia bellii	0.000125834	0	0.000489956	0	0
780	Rickettsia	0	0	0.000489956	0	0
2704465	Rhodocytophaga rosea	0	0.00348432	0.000489956	0	0
305	Ralstonia solanacearum	0	0	0.000489956	0	0
34037	Rahnella	0	0	0.000489956	0	0
2594883	Radiobacillus deserti	0	0	0.000489956	0	0
2599296	Qingshengfaniella alkalisoli	0	0	0.000489956	0	0
571800	Psychrobacter sp. G	0	0	0.000489956	0	0
2303505	Psychrobacillus sp. AK 1817	0.000125834	0	0.000489956	0	0
1643951	Pseudothermotoga	0	0	0.000489956	0	0
317	Pseudomonas syringae	0.000125834	0	0.000489956	0	0
2069256	Pseudomonas sp. XWY-1	0	0	0.000489956	0	0
2724470	Pseudomonas sp. BIGb0427	0	0	0.000489956	0	0
157692	Pseudoleptotrichia goodfellowii	0.000125834	0	0.000489956	0	0
298657	Pseudoalteromonas spongiae	0	0	0.000489956	0	0
1709477	Pseudoalteromonas sp. R3	0	0	0.000489956	0	0
151081	Pseudoalteromonas ruthenica	0	0	0.000489956	0	0
161398	Pseudoalteromonas phenolica	0	0	0.000489956	0	0
394751	Pseudoalteromonas arctica	0	0	0.000489956	0	0
874454	Pseudoalteromonas arabiensis	0	0	0.000489956	0	0
247523	Pseudoalteromonas aliena	0	0	0.000489956	0	0
685565	Pseudanabaena sp. ABRG5-3	0.000125834	0	0.000489956	0	0
587	Providencia rettgeri	0.000125834	0	0.000489956	0	0
1974213	Prosthecochloris sp. HL-130-GSB	0	0	0.000489956	0	0
1402861	Priestia filamentosa	0	0	0.000489956	0	0
412384	Priestia aryabhattai	0	0	0.000489956	0	0
2800373	Priestia	0	0	0.000489956	0	0
76123	Prevotella enoeca	0	0	0.000489956	0	0
1850254	Poseidonibacter parvus	0.000125834	0	0.000489956	0	0
1774273	Polaribacter vadi	0.000125834	0.00348432	0.000489956	0	0
1312072	Polaribacter sp. SA4-12	0	0	0.000489956	0	0
313598	Polaribacter sp. MED152	0.000125834	0	0.000489956	0	0
1855336	Polaribacter sp. KT25b	0.000251667	0	0.000489956	0	0
52959	Polaribacter	0	0	0.000489956	0	0
536441	Planobacterium Chryseobacterium taklimakanense	0.000125834	0	0.000489956	0	0
291112	Photorhabdus asymbiotica	0	0.00348432	0.000489956	0	0
909656	Phocaeicola	0.000125834	0	0.000489956	0	0
69499	Petrotoga mobilis	0	0	0.000489956	0	0
2173034	Petrocella atlantisensis	0	0	0.000489956	0	0
1478	Peribacillus simplex	0.000125834	0	0.000489956	0	0
1407	Peribacillus psychrosaccharolyticus	0	0	0.000489956	0	0
228899	Peribacillus asahii	0	0	0.000489956	0	0
913107	Pelolinea submarina	0	0	0.000489956	0	0
1727164	Pedobacter sp. PACM 27299	0	0	0.000489956	0	0
363852	Pedobacter ginsengisoli	0	0.00348432	0.000489956	0	0
180957	Pectobacterium brasiliense	0	0	0.000489956	0	0
29471	Pectobacterium atrosepticum	0	0	0.000489956	0	0
1755811	Paraphotobacterium marinum	0	0	0.000489956	0	0
2213194	Paraliobacillus zengyii	0	0	0.000489956	0	0
470934	Pantoea vagans	0	0	0.000489956	0	0
1484158	Pantoea sp. PSNIH1	0	0	0.000489956	0	0
55209	Pantoea cypripedii	0	0	0.000489956	0	0
1566358	Paenibacillus sp. IHBB 10380	0	0	0.000489956	0	0
1536769	Paenibacillus sp. FSL P4-0081	0	0	0.000489956	0	0
1870820	Paenibacillus ihbetae	0	0.00348432	0.000489956	0	0
189425	Paenibacillus graminis	0	0	0.000489956	0	0
414771	Paenibacillus donghaensis	0	0	0.000489956	0	0
1616788	Paenibacillus bovis	0	0	0.000489956	0	0
482564	Oscillatoria nigro-viridis	0	0	0.000489956	0	0
2764720	Olivibacter sp. SDN3	0	0	0.000489956	0	0
46254	Oenococcus	0	0	0.000489956	0	0
53946	Octadecabacter arcticus	0	0	0.000489956	0	0
2529032	Oceanihabitans sp. IOP_32	0.000125834	0	0.000489956	0	0
2576904	Nostoc sp. TCL26-01	0.000125834	0	0.000489956	0	0
317936	Nostoc sp. PCC 7107	0	0	0.000489956	0	0
1869241	Nostoc sp. CENA543	0	0	0.000489956	0	0
2736757	Nocardioides sp. MC1495	0	0	0.000489956	0	0
44577	Nitrosomonas ureae	0	0	0.000489956	0	0
44574	Nitrosomonas communis	0	0	0.000489956	0	0
950	Neorickettsia risticii	0	0	0.000489956	0	0
2709396	Neisseria sp. ZJ785	0	0	0.000489956	0	0
1853278	Neisseria chenwenguii	0	0	0.000489956	0	0
2579250	Nautilia sp. PV-1	0.000125834	0	0.000489956	0	0
256	Myroides odoratus	0	0	0.000489956	0	0
33923	Mycoplasmopsis Mycoplasma felis	0.000125834	0	0.000489956	0	0
171282	Mycoplasmopsis Mycoplasma columborale	0	0	0.000489956	0	0
114881	Mycoplasmopsis Mycoplasma columbinum	0	0	0.000489956	0	0
2112	Mycoplasmopsis Mycoplasma bovigenitalium	0.000125834	0	0.000489956	0	0
547987	Mycoplasma sp. Zaradi2	0	0	0.000489956	0	0
2725994	Mycoplasma sp. 1654_15	0.000125834	0	0.000489956	0	0
1749074	Mycoplasma sp. (ex Biomphalaria glabrata)	0	0	0.000489956	0	0
142651	Mycoplasma phocidae	0.000251667	0	0.000489956	0	0
171632	Mycoplasma ovis	0	0	0.000489956	0	0
2098	Mycoplasma hominis	0.000125834	0	0.000489956	0	0
2096	Mycoplasma gallisepticum	0	0.00348432	0.000489956	0	0
45361	Mycoplasma conjunctivae	0	0	0.000489956	0	0
141391	Mycoplasma Candidatus Mycoplasma haemolamae	0	0	0.000489956	0	0
169765	Mycobacterium lacus	0	0	0.000489956	0	0
2740462	Mucilaginibacter mali	0	0	0.000489956	0	0
398053	Mucilaginibacter ginsenosidivorans	0	0	0.000489956	0	0
114527	Mogibacterium diversum	0	0	0.000489956	0	0
1173027	Microcoleus sp. PCC 7113	0	0	0.000489956	0	0
1704499	Methylovulum psychrotolerans	0.000125834	0	0.000489956	0	0
95641	Methylotuvimicrobium buryatense	0	0	0.000489956	0	0
2049332	Methylomicrobium sp. wino1	0	0	0.000489956	0	0
2795386	Methylacidiphilum sp. IT6	0	0.00348432	0.000489956	0	0
2082387	Mesorhizobium sp. Pch-S	0	0	0.000489956	0	0
39645	Mesorhizobium ciceri	0	0	0.000489956	0	0
138853	Mesoplasma lactucae	0.000125834	0	0.000489956	0	0
324078	Mesoplasma coleopterae	0	0	0.000489956	0	0
444051	Mesoflavibacter	0	0	0.000489956	0	0
129985	Mesobacillus jeotgali	0	0	0.000489956	0	0
1134405	Melioribacter roseus	0	0.00348432	0.000489956	0	0
1006	Marivirga tractuosa	0	0	0.000489956	0	0
936476	Marinomonas posidonica	0	0	0.000489956	0	0
1911586	Marinilactibacillus sp. 15R	0	0	0.000489956	0	0
2027857	Mariniflexile sp. TRM1-10	0.000125834	0	0.000489956	0	0
1836467	Maribacter sp. T28	0.000251667	0	0.000489956	0	0
111844	Mannheimia pernigra	0	0	0.000489956	0	0
75984	Mannheimia	0	0	0.000489956	0	0
71237	Mammaliicoccus vitulinus	0	0	0.000489956	0	0
2321114	Malaciobacter	0	0	0.000489956	0	0
69966	Macrococcus caseolyticus	0.000503335	0	0.000489956	0	0
2070463	Lysinibacillus sp. SGAir0095	0	0	0.000489956	0	0
2590012	Lysinibacillus sp. FJAT-51161	0	0.00348432	0.000489956	0	0
1622118	Lutibacter profundi	0	0.00348432	0.000489956	0	0
1855912	Luteitalea pratensis	0	0	0.000489956	0	0
1172565	Lonsdalea populi	0	0	0.000489956	0	0
1006155	Listeria weihenstephanensis	0	0	0.000489956	0	0
1844999	Listeria sp. PSOL-1	0.000125834	0	0.000489956	0	0
1633	Limosilactobacillus vaginalis	0	0	0.000489956	0	0
1598	Limosilactobacillus reuteri	0.000125834	0	0.000489956	0	0
228229	Ligilactobacillus saerimneri	0	0	0.000489956	0	0
89059	Ligilactobacillus acidipiscis	0	0	0.000489956	0	0
2528642	Lichenihabitans psoromatis	0	0	0.000489956	0	0
1246	Leuconostoc lactis	0	0	0.000489956	0	0
1244	Leuconostoc gelidum	0.000251667	0	0.000489956	0	0
1243	Leuconostoc	0	0	0.000489956	0	0
1785996	Leptotrichia sp. oral taxon 847	0	0	0.000489956	0	0
712368	Leptotrichia sp. oral taxon 498	0	0	0.000489956	0	0
171	Leptospira	0	0	0.000489956	0	0
452	Legionella spiritensis	0	0	0.000489956	0	0
446	Legionella pneumophila	0.000125834	0	0.000489956	0	0
29423	Legionella oakridgensis	0	0	0.000489956	0	0
45067	Legionella lansingensis	0	0	0.000489956	0	0
28038	Latilactobacillus curvatus	0	0	0.000489956	0	0
2592653	Lactococcus sp. KACC 19320	0	0	0.000489956	0	0
2695882	Lactobacillus sp. 3B(2020)	0	0	0.000489956	0	0
147802	Lactobacillus iners	0	0	0.000489956	0	0
1587	Lactobacillus helveticus	0	0	0.000489956	0	0
1218494	Lactobacillus helsingborgensis	0	0	0.000489956	0	0
1600	Lactobacillus acetotolerans	0	0	0.000489956	0	0
1578	Lactobacillus	0	0	0.000489956	0	0
29370	Lacrimispora sphenoides	0.000125834	0	0.000489956	0	0
39485	Lachnospira eligens	0.000125834	0	0.000489956	0	0
2789216	Labrys sp. KNU-23	0	0	0.000489956	0	0
1330547	Kosakonia	0	0	0.000489956	0	0
2751313	Koleobacter methoxysyntrophicus	0	0	0.000489956	0	0
573	Klebsiella pneumoniae	0.000125834	0.00696864	0.000489956	0	0
1278232	Keratinibaculum paraultunense	0.000125834	0	0.000489956	0	0
261964	Kangiella koreensis	0	0	0.000489956	0	0
1241979	Kaistella carnis	0	0	0.000489956	0	0
266748	Kaistella antarctica	0.000251667	0	0.000489956	0	0
1461582	Jeotgalicoccus saudimassiliensis	0	0	0.000489956	0	0
2579935	Jejubacter calystegiae	0	0	0.000489956	0	0
2487118	Intestinibaculum porci	0	0	0.000489956	0	0
84405	Hippea maritima	0	0	0.000489956	0	0
80842	Herbaspirillum rubrisubalbicans	0	0	0.000489956	0	0
138563	Helicobacter cetorum	0	0	0.000489956	0	0
37372	Helicobacter bilis	0	0	0.000489956	0	0
42422	Halobacteroides halobius	0.000125834	0	0.000489956	0	0
1462615	Halarcobacter ebronensis	0	0	0.000489956	0	0
364410	Granulibacter bethesdensis	0	0	0.000489956	0	0
411153	Gramella forsetii	0	0	0.000489956	0	0
2663022	Gracilibacillus sp. SCU50	0	0	0.000489956	0	0
33996	Gluconacetobacter diazotrophicus	0	0	0.000489956	0	0
2527971	Gimesia algae	0	0	0.000489956	0	0
754429	Gilvibacter sp. SZ-19	0	0	0.000489956	0	0
1336796	Gillisia sp. Hel1_33_143	0.000125834	0	0.000489956	0	0
1196095	Gilliamella apicola	0	0	0.000489956	0	0
929813	Gibbsiella quercinecans	0	0	0.000489956	0	0
671211	Fusobacterium sp. oral taxon 203	0.000125834	0.00348432	0.000489956	0	0
859	Fusobacterium necrophorum	0.000125834	0	0.000489956	0	0
285729	Fusobacterium canifelinum	0	0	0.000489956	0	0
2810512	Fulvivirga sp. S481	0.000125834	0	0.000489956	0	0
1614	Fructilactobacillus fructivorans	0	0	0.000489956	0	0
263	Francisella tularensis	0.000125834	0	0.000489956	0	0
2665645	Flavobacterium sp. SLB02	0.000251667	0	0.000489956	0	0
1979344	Flavobacterium sp. MDT1-60	0	0	0.000489956	0	0
2249356	Flavobacterium sp. HYN0086	0.000125834	0	0.000489956	0	0
2775246	Flavobacterium sp. CS20	0.000125834	0.00348432	0.000489956	0	0
2518177	Flavobacterium sangjuense	0.000125834	0	0.000489956	0	0
96345	Flavobacterium psychrophilum	0.000251667	0	0.000489956	0	0
1617283	Flavobacterium nitrogenifigens	0.000251667	0	0.000489956	0	0
2547394	Flavobacterium nackdongense	0	0	0.000489956	0	0
1355330	Flavobacterium faecale	0	0	0.000489956	0	0
55197	Flavobacterium branchiophilum	0.000125834	0	0.000489956	0	0
237	Flavobacterium	0	0	0.000489956	0	0
2494373	Flammeovirga pectinis	0.000125834	0	0.000489956	0	0
44012	Ferrimonas balearica	0	0	0.000489956	0	0
2764325	Eubacterium sp. NSJ-61	0	0	0.000489956	0	0
1499973	Escherichia marmotae	0	0	0.000489956	0	0
208962	Escherichia albertii	0	0.00348432	0.000489956	0	0
1514105	Erysipelothrix larvae	0	0	0.000489956	0	0
1522	Erysipelatoclostridium [Clostridium] innocuum	0	0	0.000489956	0	0
2785331	Entomomonas sp. F2A	0	0	0.000489956	0	0
357441	Enterococcus lactis	0	0	0.000489956	0	0
1354	Enterococcus hirae	0	0	0.000489956	0	0
33945	Enterococcus avium	0	0	0.000489956	0	0
2742676	Enterobacter sp. RHBSTW-00994	0	0	0.000489956	0	0
2742639	Enterobacter sp. RHBSTW-00175	0	0	0.000489956	0	0
885040	Enterobacter soli	0	0	0.000489956	0	0
881260	Enterobacter bugandensis	0	0	0.000489956	0	0
2675793	Enterobacter aceae endosymbiont of Plateumaris braccata	0	0	0.000489956	0	0
2675782	Enterobacter aceae endosymbiont of Donacia proxima	0	0	0.000489956	0	0
2675776	Enterobacter aceae endosymbiont of Donacia crassipes	0	0	0.000489956	0	0
2675774	Enterobacter aceae endosymbiont of Donacia cinerea	0.000125834	0	0.000489956	0	0
1756149	Elizabethkingia bruuniana	0	0	0.000489956	0	0
944	Ehrlichia canis	0	0	0.000489956	0	0
93378	Edwardsiella hoshinae	0	0	0.000489956	0	0
635	Edwardsiella	0	0	0.000489956	0	0
1168034	Draconibacterium orientale	0	0	0.000489956	0	0
1239415	Dokdonia sp. PRO95	0	0	0.000489956	0	0
204042	Dickeya zeae	0	0	0.000489956	0	0
2161821	Dialister massiliensis	0	0	0.000489956	0	0
1564	Desulfotomaculum ruminis	0	0	0.000489956	0	0
59610	Desulfotomaculum reducens	0	0.00348432	0.000489956	0	0
1833852	Desulfotomaculum ferrireducens	0	0	0.000489956	0	0
885581	Desulfosporosinus acidiphilus	0	0	0.000489956	0	0
947919	Desulfosarcina widdelii	0	0	0.000489956	0	0
2569541	Desulfopila sp. IMCC35005	0	0	0.000489956	0	0
45656	Desulfonema limicola	0	0	0.000489956	0	0
142877	Desulfitobacterium metallireducens	0	0	0.000489956	0	0
55583	Dehalobacter restrictus	0.000125834	0	0.000489956	0	0
665099	Cytobacillus oceanisediminis	0	0	0.000489956	0	0
859143	Cytobacillus kochii	0	0	0.000489956	0	0
34067	Cycloclasticus	0	0	0.000489956	0	0
106590	Cupriavidus necator	0	0	0.000489956	0	0
38290	Corynebacterium macginleyi	0.000125834	0	0.000489956	0	0
161879	Corynebacterium kroppenstedtii	0	0	0.000489956	0	0
35786	Coprothermobacter proteolyticus	0	0	0.000489956	0	0
2751153	Coprobacter sp. 2CBH44	0	0	0.000489956	0	0
160825	Comamonas koreensis	0	0	0.000489956	0	0
225991	Comamonas aquatica	0.000125834	0	0.000489956	0	0
1816218	Colwellia sp. PAMC 20917	0	0	0.000489956	0	0
28229	Colwellia psychrerythraea	0	0	0.000489956	0	0
2507935	Cohnella abietis	0	0	0.000489956	0	0
1497	Clostridium formicaceticum	0	0	0.000489956	0	0
332101	Clostridium drakei	0.000125834	0.00348432	0.000489956	0	0
1493	Clostridium cellulovorans	0.000251667	0	0.000489956	0	0
217159	Clostridium carboxidivorans	0.000125834	0	0.000489956	0	0
2039166	Chryseobacterium sp. 6424	0	0	0.000489956	0	0
1685010	Chryseobacterium glaciei	0.000503335	0	0.000489956	0	0
1967782	Chlamydia sp. H15-1957-10C	0.000125834	0	0.000489956	0	0
85991	Chlamydia pecorum	0	0	0.000489956	0	0
2029983	Chitinophaga caeni	0	0	0.000489956	0	0
2703787	Chitinophaga agri	0	0	0.000489956	0	0
2686362	Cellulophaga sp. L1A9	0.000125834	0	0.000489956	0	0
2172099	Catenovulum sp. CCB-QB4	0.000125834	0	0.000489956	0	0
2748	Carnobacterium divergens	0	0	0.000489956	0	0
412965	Candidatus Vesicomyosocius okutanii	0	0	0.000489956	0	0
389348	Candidatus Protochlamydia naegleriophila	0	0	0.000489956	0	0
362787	Candidatus Protochlamydia amoebophila	0	0	0.000489956	0	0
91844	Candidatus Portiera aleyrodidarum	0.000125834	0	0.000489956	0	0
2115978	Candidatus Phycorickettsia trachydisci	0	0	0.000489956	0	0
2588536	Candidatus Methylopumilus universalis	0	0	0.000489956	0	0
174633	Candidatus Kuenenia stuttgartiensis	0	0	0.000489956	0	0
1576550	Candidatus Kinetoplastibacterium sorsogonicusi	0	0	0.000489956	0	0
1541959	Candidatus Izimaplasma sp. HR1	0	0	0.000489956	0	0
295596	Candidatus Hepatoplasma crinochetorum	0	0	0.000489956	0	0
138072	Candidatus Hamiltonella defensa	0	0	0.000489956	0	0
1457365	Candidatus Cyclonatronum proteinivorum	0.000125834	0	0.000489956	0	0
247481	Candidatus Cardinium hertigii	0	0	0.000489956	0	0
134287	Candidatus Blochmannia secondary endosymbiont of Heteropsylla cubana	0	0.00348432	0.000489956	0	0
2681986	Candidatus Blochmannia Blochmannia endosymbiont of Camponotus nipponensis	0.000125834	0	0.000489956	0	0
203804	Candidatus Blochmannia	0	0	0.000489956	0	0
827	Campylobacter ureolyticus	0	0	0.000489956	0	0
2517362	Campylobacter sp. CCUG 57310	0	0	0.000489956	0	0
449520	Campylobacter canadensis	0	0.00348432	0.000489956	0	0
522485	Campylobacter avium	0	0	0.000489956	0	0
2005462	Calothrix sp. NIES-3974	0	0	0.000489956	0	0
1337936	Calothrix sp. 336/3	0	0	0.000489956	0	0
116090	Caloranaerobacter azorensis	0.000125834	0.00348432	0.000489956	0	0
693075	Caldisericum exile	0	0	0.000489956	0	0
55205	Caldicellulosiruptor owensensis	0	0	0.000489956	0	0
43305	Butyrivibrio proteoclasticus	0	0	0.000489956	0	0
831	Butyrivibrio fibrisolvens	0	0	0.000489956	0	0
571256	Brucella pituitosa	0	0	0.000489956	0	0
55080	Brevibacillus	0	0	0.000489956	0	0
1397703	Brasilonema sennae	0	0	0.000489956	0	0
1325090	Bradyrhizobium guangdongense	0	0	0.000489956	0	0
1437360	Bradyrhizobium erythrophlei	0	0	0.000489956	0	0
159	Brachyspira hyodysenteriae	0	0	0.000489956	0	0
1674146	Borreliella mayonii	0	0	0.000489956	0	0
139	Borreliella burgdorferi	0	0	0.000489956	0	0
2761123	Borrelia maritima	0	0	0.000489956	0	0
40520	Blautia obeum	0	0	0.000489956	0	0
572511	Blautia	0	0	0.000489956	0	0
1686	Bifidobacterium catenulatum	0	0	0.000489956	0	0
803	Bartonella quintana	0	0	0.000489956	0	0
33045	Bartonella grahamii	0	0	0.000489956	0	0
774	Bartonella bacilliformis	0	0	0.000489956	0	0
2715212	Bacteroides sp. CBA7301	0	0	0.000489956	0	0
28116	Bacteroides ovatus	0	0	0.000489956	0	0
329854	Bacteroides intestinalis	0	0	0.000489956	0	0
817	Bacteroides fragilis	0.000125834	0	0.000489956	0	0
151276	Bacteroides coprosuis	0.000125834	0	0.000489956	0	0
47678	Bacteroides caccae	0.000125834	0	0.000489956	0	0
1547283	Bacillus weihaiensis	0	0	0.000489956	0	0
1476025	Bacillus vini	0	0	0.000489956	0	0
46224	Bacillus sporothermodurans	0.000251667	0	0.000489956	0	0
352858	Bacillus sp. Y1	0.000125834	0	0.000489956	0	0
2592382	Bacillus sp. M4U3P1	0	0	0.000489956	0	0
2014076	Bacillus sp. FJAT-42376	0	0	0.000489956	0	0
1408	Bacillus pumilus	0	0	0.000489956	0	0
189381	Bacillus marisflavi	0	0	0.000489956	0	0
1402	Bacillus licheniformis	0	0	0.000489956	0	0
1925021	Bacillus haynesii	0	0	0.000489956	0	0
1664069	Bacillus glycinifermentans	0	0	0.000489956	0	0
1397	Bacillus circulans	0.000125834	0	0.000489956	0	0
502682	Aurantiacibacter gangjinensis	0	0	0.000489956	0	0
1663	Arthrobacter	0	0	0.000489956	0	0
638	Arsenophonus nasoniae	0	0	0.000489956	0	0
634113	Arsenophonus Candidatus Arsenophonus lipoptenae	0	0	0.000489956	0	0
1315211	Arcobacter aquimarinus	0.000125834	0	0.000489956	0	0
332411	Aquitalea magnusonii	0	0	0.000489956	0	0
1714848	Aquimarina sp. AD1	0.000251667	0	0.000489956	0	0
247480	Anoxybacillus caldiproteolyticus	0	0	0.000489956	0	0
949	Anaplasma platys	0	0	0.000489956	0	0
649756	Anaerostipes hadrus	0	0	0.000489956	0	0
2696063	Anaerocolumna sedimenticola	0	0.00348432	0.000489956	0	0
33037	Anaerococcus vaginalis	0	0	0.000489956	0	0
1287640	Anaerococcus obesiensis	0.000251667	0	0.000489956	0	0
165779	Anaerococcus	0	0	0.000489956	0	0
1647413	Anabaena sp. WA102	0.000125834	0	0.000489956	0	0
2767188	Amniculibacterium sp. G2-70	0	0	0.000489956	0	0
433296	Aminipila butyrica	0	0	0.000489956	0	0
2583452	Amedibacterium intestinale	0.000125834	0	0.000489956	0	0
715451	Alteromonas naphthalenivorans	0	0	0.000489956	0	0
1085644	Allofrancisella frigidaquae	0	0.00348432	0.000489956	0	0
2585119	Alistipes dispar	0	0	0.000489956	0	0
668	Aliivibrio fischeri	0.000125834	0.00696864	0.000489956	0	0
544718	Aliarcobacter thereius	0.000125834	0	0.000489956	0	0
255507	Aliarcobacter cibarius	0	0	0.000489956	0	0
2321111	Aliarcobacter	0.000125834	0	0.000489956	0	0
388413	Algoriphagus machipongonensis	0	0	0.000489956	0	0
1736674	Algibacter alginicilyticus	0	0	0.000489956	0	0
358	Agrobacterium tumefaciens	0.000125834	0	0.000489956	0	0
310575	Advenella kashmirensis	0	0	0.000489956	0	0
2745197	Adhaeribacter radiodurans	0.000125834	0	0.000489956	0	0
2708340	Actinomyces sp. zg-332	0	0	0.000489956	0	0
715	Actinobacillus pleuropneumoniae	0	0	0.000489956	0	0
1808001	Acinetobacter sp. LoGeW2-3	0	0	0.000489956	0	0
487316	Acinetobacter soli	0	0	0.000489956	0	0
48296	Acinetobacter pittii	0.000125834	0	0.000489956	0	0
28090	Acinetobacter lwoffii	0	0	0.000489956	0	0
470	Acinetobacter baumannii	0.000503335	0	0.000489956	0	0
1232575	Acidithiobacillus ferridurans	0	0	0.000489956	0	0
905	Acidaminococcus fermentans	0	0	0.000489956	0	0
264636	Acholeplasma hippikon	0.000125834	0	0.000489956	0	0
61635	Acholeplasma brassicae	0	0	0.000489956	0	0
1511	Acetoanaerobium sticklandii	0	0	0.000489956	0	0
86106	endosymbiont of Acanthamoeba sp. UWC8	0	0	0.000489956	0	0
29380	Staphylococcus caprae	0.000251667	0	0	0.0126263	0
39777	Veillonella atypica	0	0	0	0.010101	0
29465	Veillonella	0	0.00348432	0	0.00757576	0
13687	Sphingomonas	0	0	0	0.00505051	0
1979527	Corynebacterium kefirresidentii	0.000251667	0	0	0.00505051	0
202956	Acinetobacter towneri	0	0	0	0.00505051	0
2682456	Veillonella nakazawae	0	0	0	0.00252525	0
85643	Thauera sp. MZ1T	0.000125834	0	0	0.00252525	0
2005884	Thauera sp. K11	0	0	0	0.00252525	0
2590900	Tenuifilum thalassicum	0.000125834	0	0	0.00252525	0
32052	Synechococcus sp. WH 8020	0	0	0	0.00252525	0
32046	Synechococcus elongatus	0.000125834	0	0	0.00252525	0
387093	Sulfurovum sp. NBC37-1	0	0	0	0.00252525	0
44674	Sulfurospirillum barnesii	0	0	0	0.00252525	0
712623	Streptococcus sp. oral taxon 061	0	0	0	0.00252525	0
2610896	Streptococcus sp. LPB0220	0.000125834	0	0	0.00252525	0
1759399	Streptococcus sp. A12	0	0	0	0.00252525	0
257758	Streptococcus pseudopneumoniae	0	0	0	0.00252525	0
1318	Streptococcus parasanguinis	0	0	0	0.00252525	0
1328	Streptococcus anginosus	0.000125834	0	0	0.00252525	0
29382	Staphylococcus cohnii	0.000251667	0	0	0.00252525	0
2057025	Spirosoma pollinicola	0	0	0	0.00252525	0
216964	Spiroplasma sp. BIUS-1	0	0	0	0.00252525	0
2714944	Sphingomonas sp. HDW15C	0	0	0	0.00252525	0
2219696	Sphingomonas sp. FARSPH	0	0	0	0.00252525	0
563	Shimwellia blattae	0	0	0	0.00252525	0
1137095	Scytonema sp. HK-05	0	0	0	0.00252525	0
1521	Ruminiclostridium cellulolyticum	0.000125834	0	0	0.00252525	0
43675	Rothia mucilaginosa	0	0	0	0.00252525	0
169480	Rothia amarae	0	0	0	0.00252525	0
34038	Rahnella aquatilis	0	0	0	0.00252525	0
357794	Psychromonas ingrahamii	0.000125834	0	0	0.00252525	0
45610	Psychrobacter urativorans	0	0	0	0.00252525	0
1898684	Pseudomonas sp. LPH1	0	0	0	0.00252525	0
47885	Pseudomonas oryzihabitans	0	0	0	0.00252525	0
43657	Pseudoalteromonas luteoviolacea	0.000125834	0	0	0.00252525	0
183417	Proteus hauseri	0	0	0	0.00252525	0
197222	Paraglaciecola mesophila	0	0	0	0.00252525	0
2500532	Paracoccus sp. Arc7-R13	0	0	0	0.00252525	0
1536774	Paenibacillus sp. FSL H7-0357	0	0	0	0.00252525	0
784	Orientia tsutsugamushi	0	0	0	0.00252525	0
1247	Oenococcus oeni	0	0	0	0.00252525	0
2601898	Noviherbaspirillum sp. UKPF54	0	0	0	0.00252525	0
2576903	Nostoc sp. C057	0	0	0	0.00252525	0
153948	Nitrosomonas sp. AL212	0	0	0	0.00252525	0
1740721	Neobacillus cucumis	0	0	0	0.00252525	0
76831	Myroides	0	0	0	0.00252525	0
29561	Mycoplasmopsis Mycoplasma meleagridis	0	0	0	0.00252525	0
2115	Mycoplasmopsis Mycoplasma fermentans	0	0	0	0.00252525	0
1658665	Mitsuaria sp. 7	0	0	0	0.00252525	0
149698	Massilia	0	0	0	0.00252525	0
147322	Limnospira indica	0.0187492	0	0	0.00252525	0
309868	Liberibacter Candidatus Liberibacter americanus	0.000377501	0	0	0.00252525	0
1138822	Lentilactobacillus curieae	0	0	0	0.00252525	0
47671	Lautropia mirabilis	0	0	0	0.00252525	0
266749	Kaistella jeonii	0	0	0	0.00252525	0
281472	Jiangella	0	0	0	0.00252525	0
591197	Ignavibacterium album	0.000125834	0	0	0.00252525	0
1427356	Hyphomicrobium nitrativorans	0	0	0	0.00252525	0
1842537	Hydrogenophaga sp. RAC07	0	0	0	0.00252525	0
356322	Heliorestis convoluta	0	0	0	0.00252525	0
2306583	Halomonas sp. JS92-SW72	0	0	0	0.00252525	0
726	Haemophilus haemolyticus	0.000125834	0	0	0.00252525	0
1813182	Geobacillus sp. JS12	0	0	0	0.00252525	0
1963025	Geobacillus sp. 46C-IIa	0	0	0	0.00252525	0
1267021	Frischella perrara	0	0	0	0.00252525	0
143361	Filifactor alocis	0	0	0	0.00252525	0
2675795	Escherichia Enterobacteriaceae endosymbiont of Plateumaris pusilla	0	0	0	0.00252525	0
2675791	Escherichia Enterobacteriaceae endosymbiont of Macroplea mutica	0	0	0	0.00252525	0
1812935	Enterobacter roggenkampii	0.000125834	0	0	0.00252525	0
2714925	Diaphorobacter sp. HDW4B	0	0	0	0.00252525	0
1006576	Defluviitoga tunisiensis	0	0	0	0.00252525	0
33011	Cutibacterium granulosum	0	0	0	0.00252525	0
1727	Corynebacterium variabile	0	0	0	0.00252525	0
43769	Corynebacterium propinquum	0	0	0	0.00252525	0
2714036	Companilactobacillus pabuli	0	0	0	0.00252525	0
58049	Colwellia sp. MT41	0	0	0	0.00252525	0
2728023	Cohnella sp. MFER-1	0	0	0	0.00252525	0
2212991	Clostridium sp. AWRP	0	0.00348432	0	0.00252525	0
2724619	Chryseobacterium sp. NEB161	0.000251667	0	0	0.00252525	0
54299	Chroococcidiopsis thermalis	0	0.00348432	0	0.00252525	0
1002672	Candidatus Pelagibacter sp. IMCC9063	0	0	0	0.00252525	0
1630141	Candidatus Nitrosoglobus terrae	0.000125834	0	0	0.00252525	0
1954171	Calothrix sp. NIES-2098	0	0	0	0.00252525	0
1355477	Bradyrhizobium diazoefficiens	0	0	0	0.00252525	0
34098	Blattabacterium	0.000125834	0	0	0.00252525	0
28111	Bacteroides eggerthii	0	0	0	0.00252525	0
1405	Bacillus mycoides	0.000125834	0	0	0.00252525	0
1471	Bacillus methanolicus	0.000125834	0.00348432	0	0.00252525	0
353	Azotobacter chroococcum	0	0	0	0.00252525	0
2816454	Aureimonas sp. OT7	0.000125834	0	0	0.00252525	0
1537400	Aquitalea aquatilis	0	0	0	0.00252525	0
1653480	Alloactinosynnema sp. L-07	0	0	0	0.00252525	0
714	Aggregatibacter actinomycetemcomitans	0.000125834	0	0	0.00252525	0
651	Aeromonas media	0	0	0	0.00252525	0
1375	Aerococcus	0	0	0	0.00252525	0
70346	Acinetobacter variabilis	0	0	0	0.00252525	0
12916	Acidovorax	0.000377501	0	0	0.00252525	0
419257	Yersinia massiliensis	0	0.00348432	0	0	0
628	Xenorhabdus nematophila	0.000125834	0	0	0	0
48664	Xanthomonas fragariae	0.000125834	0	0	0	0
1812115	Wolbachia endosymbiont of Dirofilaria (Dirofilaria) immitis	0	0.00348432	0	0	0
1936080	Winogradskyella sp. J14-2	0.000125834	0	0	0	0
2697010	Winogradskyella helgolandensis	0.000125834	0.00348432	0	0	0
1398	Weizmannia coagulans	0.000125834	0	0	0	0
1629	Weissella viridescens	0	0.00348432	0	0	0
1162633	Weissella diestrammenae	0.000251667	0	0	0	0
137591	Weissella cibaria	0.000125834	0	0	0	0
1014	Weeksella virosa	0.000251667	0	0	0	0
403957	Virgibacillus sp. SK37	0.000125834	0	0	0	0
2662262	Vibrio sp. SM1977	0.000251667	0	0	0	0
28172	Vibrio metschnikovii	0.000125834	0	0	0	0
689	Vibrio mediterranei	0.000125834	0	0	0	0
680	Vibrio campbellii	0.000251667	0	0	0	0
1443036	Vespertiliibacter pulmonis	0.000125834	0	0	0	0
248315	Veillonella rodentium	0.000125834	0	0	0	0
282217	Variovorax sp. SRS16	0.000125834	0	0	0	0
2774875	Variovorax sp. 38R	0	0.00348432	0	0	0
34073	Variovorax paradoxus	0.000125834	0	0	0	0
218144	Vagococcus carniphilus	0.000251667	0	0	0	0
367743	Ureibacillus thermophilus	0	0.00348432	0	0	0
1850246	Urechidicola croceus	0	0.00348432	0	0	0
53419	Treponema socranskii	0.000125834	0	0	0	0
58231	Treponema medium	0.000125834	0	0	0	0
2735563	Thiothrix sp. Ku-5	0.000125834	0.00348432	0	0	0
2580412	Thiomicrorhabdus sediminis	0	0.00348432	0	0	0
1915078	Thioclava nitratireducens	0.000125834	0	0	0	0
106634	Thioalkalivibrio versutus	0	0.00348432	0	0	0
1033854	Thioalkalivibrio sulfidiphilus	0	0.00348432	0	0	0
2234087	Thermodesulfobacterium sp. TA1	0.000125834	0	0	0	0
1295609	Thermodesulfobacterium geofontis	0.000125834	0	0	0	0
1712410	Thermoanaerosceptrum fracticalcis	0.000125834	0	0	0	0
46354	Thermoanaerobacter wiegelii	0.000125834	0	0	0	0
2325	Thermoanaerobacter kivui	0.000125834	0	0	0	0
1134435	Thauera humireducens	0.000125834	0	0	0	0
33057	Thauera	0.000125834	0	0	0	0
2527994	Thalassoglobus polymorphus	0.000125834	0	0	0	0
526944	Tetragenococcus osmophilus	0.000125834	0	0	0	0
107401	Tenacibaculum maritimum	0.000125834	0	0	0	0
2487345	Tatumella sp. TA1	0.000125834	0	0	0	0
943830	Tardiphaga robiniae	0.000125834	0	0	0	0
28112	Tannerella forsythia	0.000125834	0	0	0	0
1630406	Tamlana sp. s12	0	0.00696864	0	0	0
2069432	Tamlana carrageenivorans	0.000125834	0	0	0	0
86170	Syntrophothermus lipocalidus	0.000125834	0	0	0	0
863	Syntrophomonas wolfei	0.000125834	0	0	0	0
51197	Syntrophobotulus glycolicus	0	0.00348432	0	0	0
1386941	Synechococcus sp. MVIR-18-1	0.000125834	0	0	0	0
2740405	Sulfurimonas Candidatus Sulfurimonas marisnigri	0.000125834	0.00348432	0	0	0
1811807	Sulfuriflexus mobilis	0	0.00348432	0	0	0
1620215	Sulfuricaulis limicola	0.000125834	0	0	0	0
2587855	Sulfitobacter sp. THAF37	0.000125834	0	0	0	0
83656	Streptomyces tsukubensis	0	0.00348432	0	0	0
2692234	Streptomyces sp. GS7	0	0.00348432	0	0	0
2750025	Streptomyces sp. CB00271	0.000125834	0	0	0	0
379067	Streptomyces bingchenggensis	0.000125834	0	0	0	0
1310	Streptococcus sobrinus	0	0.00348432	0	0	0
1314	Streptococcus pyogenes	0.000125834	0	0	0	0
197614	Streptococcus pasteurianus	0.000125834	0	0	0	0
1309	Streptococcus mutans	0.000125834	0	0	0	0
150055	Streptococcus lutetiensis	0.000125834	0	0	0	0
1335	Streptococcus equinus	0.000125834	0	0	0	0
1334	Streptococcus dysgalactiae	0.000125834	0	0	0	0
40324	Stenotrophomonas maltophilia	0.000251667	0.00348432	0	0	0
1288	Staphylococcus xylosus	0.000503335	0.00348432	0	0	0
61015	Staphylococcus succinus	0.000125834	0.00348432	0	0	0
283734	Staphylococcus pseudintermedius	0.000125834	0	0	0	0
155085	Staphylococcus lutrae	0.000125834	0	0	0	0
2781774	Staphylococcus lloydii	0.000125834	0	0	0	0
29384	Staphylococcus kloosii	0.000629168	0	0	0	0
102116	Stanieria cyanosphaera	0.000125834	0	0	0	0
2283194	Sporosarcina sp. PTS2304	0.000125834	0	0	0	0
1620392	Spongiibacter sp. IMCC21906	0	0.00348432	0	0	0
2520506	Spirosoma sp. KCTC 42546	0.000125834	0	0	0	0
2728024	Spirosoma sp. CJU-R4	0.000125834	0	0	0	0
2666025	Spirosoma endbachense	0.000125834	0	0	0	0
216963	Spiroplasma sp. TIUS-1	0	0.00348432	0	0	0
2134	Spiroplasma melliferum	0.000125834	0	0	0	0
2137	Spiroplasma apis	0.000125834	0	0	0	0
216931	Spiroplasma alleghenense	0.000125834	0	0	0	0
2132	Spiroplasma	0.000125834	0.00348432	0	0	0
2077182	Sphingorhabdus sp. YGSMI21	0	0.00348432	0	0	0
2735134	Sphingomonas sp. AP4-R1	0.000125834	0	0	0	0
1609977	Sphingomonas hengshuiensis	0.000251667	0	0	0	0
2733867	Sphingobium sp. KCTC 72723	0.000125834	0	0	0	0
1673076	Sphingobium hydrophobicum	0.000251667	0	0	0	0
2662364	Sphingobacterium sp. dk4302	0.000125834	0	0	0	0
561061	Sphingobacterium psychroaquaticum	0.000125834	0.00348432	0	0	0
34103	Sphaerotilus natans	0.000880836	0	0	0	0
995	Solitalea canadensis	0.000125834	0	0	0	0
1929246	Sodalis endosymbiont of Henestaris halophilus	0.000125834	0	0	0	0
1196083	Snodgrassella alvi	0.000125834	0	0	0	0
2109915	Simplicispira suum	0.000125834	0	0	0	0
1915309	Silvanigrella aquatica	0.000251667	0	0	0	0
762954	Siansivirga zeaxanthinifaciens	0.000251667	0	0	0	0
2806008	Shewanella sp. LZH-2	0.000251667	0	0	0	0
2589790	Shewanella sp. LC6	0	0.00348432	0	0	0
2698686	Shewanella sp. Arc9-LZ	0.000125834	0.00348432	0	0	0
271097	Shewanella sediminis	0.000125834	0	0	0	0
70863	Shewanella oneidensis	0.000377501	0	0	0	0
150120	Shewanella livingstonensis	0.000125834	0	0	0	0
2597702	Serratia sp. KUDC3025	0	0.00348432	0	0	0
61652	Serratia rubidaea	0.000125834	0	0	0	0
28151	Serratia proteamaculans	0.000125834	0	0	0	0
615	Serratia marcescens	0	0.00348432	0	0	0
826	Sebaldella termitidis	0.000251667	0	0	0	0
2005464	Scytonema sp. NIES-4073	0.000125834	0	0	0	0
590	Salmonella	0.000125834	0	0	0	0
1908198	Salinivibrio kushneri	0.000125834	0	0	0	0
2743001	Salicibibacter sp. NKC21-4	0.000125834	0	0	0	0
1729720	Salegentibacter sp. T436	0	0.00348432	0	0	0
2268026	Runella sp. SP2	0.000629168	0	0	0	0
2564099	Ruminococcus sp. JE7A12	0.000125834	0	0	0	0
1160721	Ruminococcus bicirculans	0.000125834	0	0	0	0
1379909	Rufibacter sp. DG15C	0	0.00348432	0	0	0
2653852	Rubrobacter sp. SCSIO 52915	0.000125834	0	0	0	0
28068	Rubrivivax gelatinosus	0.000125834	0	0	0	0
215743	Roseovarius mucosus	0.000125834	0	0	0	0
76731	Roseateles depolymerans	0.000125834	0	0	0	0
2546366	Rippkaea orientalis	0	0.00696864	0	0	0
788	Rickettsia canadensis	0	0.00348432	0	0	0
2741720	Rhodoferax sp. BAB1	0.000125834	0	0	0	0
379684	Rhizobium pseudoryzae	0.000125834	0	0	0	0
1138189	Rhizobium bangladeshense	0.000125834	0	0	0	0
2498451	Rheinheimera sp. LHK132	0.000125834	0	0	0	0
1763998	Rheinheimera sp. F8	0	0.00348432	0	0	0
2545632	Rheinheimera sp. D18	0.000251667	0	0	0	0
330922	Psychrobacter cryohalolentis	0.000125834	0	0	0	0
256326	Psychrobacter arenosus	0.000125834	0	0	0	0
2283160	Psychrobacillus glaciei	0.000251667	0	0	0	0
128785	Pseudoxanthomonas mexicana	0.000125834	0	0	0	0
158627	Pseudomonas graminis	0.000125834	0	0	0	0
53408	Pseudomonas citronellolis	0	0.00348432	0	0	0
219572	Pseudomonas antarctica	0.000251667	0	0	0	0
237609	Pseudomonas alkylphenolica	0.000377501	0	0	0	0
1716143	Pseudodesulfovibrio indicus	0.000125834	0	0	0	0
185007	Pseudobutyrivibrio xylanivorans	0.000125834	0	0	0	0
166935	Pseudoalteromonas translucida	0.000251667	0	0	0	0
43659	Pseudoalteromonas tetraodonis	0	0.00348432	0	0	0
2583375	Pseudoalteromonas sp. 16-SW-7	0.000125834	0	0	0	0
43658	Pseudoalteromonas rubra	0.000125834	0	0	0	0
43662	Pseudoalteromonas piscicida	0.000125834	0	0	0	0
267375	Pseudoalteromonas marina	0.000125834	0	0	0	0
28107	Pseudoalteromonas espejiana	0.000251667	0	0	0	0
1642647	Proteiniphilum saccharofermentans	0	0.00348432	0	0	0
838	Prevotella	0.000125834	0	0	0	0
323450	Pontibacter actiniarum	0.000125834	0	0	0	0
576610	Polynucleobacter necessarius	0.000125834	0	0	0	0
1835254	Polynucleobacter duraquae	0.000125834	0	0	0	0
296591	Polaromonas sp. JS666	0.000125834	0	0	0	0
2818493	Polaribacter sp. SM13	0.000125834	0	0	0	0
754397	Polaribacter sp. SA4-10	0	0.00348432	0	0	0
192421	Planococcus maritimus	0.000125834	0	0	0	0
1160	Planktothrix agardhii	0.0011325	0	0	0	0
1632865	Pirellula sp. SH-Sr6A	0.000125834	0	0	0	0
387090	Phocaeicola coprophilus	0	0.00348432	0	0	0
33025	Phascolarctobacterium faecium	0.000125834	0	0	0	0
309805	Persephonella marina	0.000125834	0	0	0	0
484770	Pelosinus sp. UFO1	0.000251667	0	0	0	0
2201271	Pedobacter sp. eg	0	0.00696864	0	0	0
2605747	Pedobacter sp. CJ43	0.000125834	0	0	0	0
336820	Pedobacter roseus	0.000125834	0	0	0	0
114090	Pediococcus inopinatus	0.000125834	0	0	0	0
51663	Pediococcus damnosus	0	0.00348432	0	0	0
1254	Pediococcus acidilactici	0.000125834	0	0	0	0
2042057	Pectobacterium polaris	0.000125834	0	0	0	0
1768242	Paucibacter sp. KCTC 42545	0.000125834	0	0	0	0
2560053	Paracoccus liaowanqingii	0.000125834	0	0	0	0
83552	Parachlamydia acanthamoebae	0.000125834	0	0	0	0
1822464	Paraburkholderia	0.000125834	0	0	0	0
59814	Pantoea dispersa	0.000377501	0	0	0	0
1235990	Pantoea Candidatus Pantoea carbekii	0.000377501	0.00696864	0	0	0
1891675	Pantoea alhagi	0.000125834	0	0	0	0
53335	Pantoea	0.000377501	0	0	0	0
93221	Pandoraea pulmonicola	0.000125834	0	0	0	0
417367	Paenisporosarcina antarctica	0.000125834	0	0	0	0
248903	Paenibacillus xylanilyticus	0.000125834	0	0	0	0
528191	Paenibacillus xylanexedens	0.000125834	0	0	0	0
324057	Paenibacillus sp. JDR-2	0.000125834	0	0	0	0
1536771	Paenibacillus sp. FSL R5-0912	0	0.00348432	0	0	0
189426	Paenibacillus odorifer	0	0.00348432	0	0	0
562959	Paenibacillus cellulositrophicus	0.000125834	0	0	0	0
198119	Paenibacillus barcinonensis	0.000125834	0	0	0	0
847	Oxalobacter formigenes	0.000125834	0	0	0	0
118323	Oscillatoria acuminata	0.000251667	0	0	0	0
90244	Oligella ureolytica	0.000125834	0	0	0	0
28118	Odoribacter splanchnicus	0.000125834	0	0	0	0
1618022	Nostoc sp. 'Lobaria pulmonaria (5183) cyanobiont'	0.000125834	0	0	0	0
92942	Nostoc linckia	0.000125834	0	0	0	0
2058134	Nonlabens sp. MB-3u-79	0.000503335	0	0	0	0
261292	Nitrosomonas sp. Is79A3	0.000251667	0	0	0	0
2706014	Nitratiruptor labii	0.000125834	0	0	0	0
1756988	Nitratireductor sp. OM-1	0.000125834	0	0	0	0
1193713	Neobacillus mesonae	0	0.00348432	0	0	0
640030	Neisseria zalophi	0	0.00348432	0	0	0
28091	Neisseria weaveri	0.000125834	0	0	0	0
487	Neisseria meningitidis	0.000125834	0	0	0	0
482	Neisseria	0.000125834	0	0	0	0
702745	Myroides phaeus	0.000125834	0	0	0	0
2107	Mycoplasmopsis Mycoplasma pulmonis	0.000125834	0	0	0	0
76629	Mycoplasmopsis Mycoplasma gallopavonis	0.000125834	0	0	0	0
29556	Mycoplasmopsis Mycoplasma gallinaceum	0.000125834	0	0	0	0
51365	Mycoplasma yeatsii	0.000125834	0.00348432	0	0	0
1612150	Mycoplasma tullyi	0.000125834	0	0	0	0
754516	Mycoplasma sp. Mirounga ES2806-NAS	0.000125834	0	0	0	0
754515	Mycoplasma sp. Mirounga ES2806-GEN	0.000125834	0	0	0	0
142649	Mycoplasma phocicerebrale	0.000125834	0	0	0	0
28227	Mycoplasma penetrans	0.000125834	0	0	0	0
2118	Mycoplasma mobile	0.000251667	0	0	0	0
2116	Mycoplasma iowae	0.000125834	0	0	0	0
2099	Mycoplasma hyopneumoniae	0.000125834	0	0	0	0
2128	Mycoplasma flocculare	0.000125834	0	0	0	0
86660	Mycoplasma dispar	0.000125834	0	0	0	0
92401	Mycoplasma cloacale	0	0.00348432	0	0	0
519450	Mycoplasma anserisalpingitidis	0.000377501	0	0	0	0
2093	Mycoplasma	0	0.00348432	0	0	0
36809	Mycobacteroides abscessus	0	0.00348432	0	0	0
2698672	Muricauda sp. 501str8	0.000125834	0	0	0	0
1796646	Muribaculum intestinale	0.000125834	0	0	0	0
2530390	Muribaculum gordoncarteri	0.000125834	0	0	0	0
2728022	Mucilaginibacter sp. F39-2	0.000125834	0	0	0	0
1550579	Mucilaginibacter gotjawali	0.000125834	0	0	0	0
1126	Microcystis aeruginosa	0.000125834	0	0	0	0
1125	Microcystis	0.000125834	0	0	0	0
1197	Microchaete diplosiphon	0.000125834	0	0	0	0
1516059	Microbulbifer sp. ALW1	0.000125834	0	0	0	0
359370	Microbulbifer sp. A4B17	0.000125834	0	0	0	0
1842540	Methyloversatilis sp. RAC08	0.000125834	0	0	0	0
2744521	Mesorhizobium sp. L-2-11	0.000125834	0	0	0	0
279826	Mesobacillus foraminis	0.000125834	0	0	0	0
33970	Melissococcus plutonius	0.000125834	0.00348432	0	0	0
2769491	Massilia sp. LPB0304	0.000125834	0	0	0	0
321983	Massilia albidiflava	0.000125834	0	0	0	0
400668	Marinomonas sp. MWYL1	0	0.00348432	0	0	0
2071621	Marinomonas sp. FW-1	0	0.00348432	0	0	0
48076	Marinobacterium georgiense	0.000125834	0	0	0	0
160798	Marinitoga	0.000125834	0	0	0	0
1644130	Maribacter sp. 1_2014MBL_MicDiv	0.000125834	0	0	0	0
320912	Maribacter dokdonensis	0.000125834	0	0	0	0
1178778	Maribacter cobaltidurans	0.000125834	0	0	0	0
252356	Maribacter	0	0.00348432	0	0	0
643214	Mammaliicoccus stepanovicii	0.000125834	0	0	0	0
1912871	Malaciobacter canalis	0	0.00348432	0	0	0
884684	Mageeibacillus indolicus	0	0.00348432	0	0	0
1903056	Macrococcus bohemicus	0.000125834	0	0	0	0
2072025	Lysinibacillus sp. YS11	0.000125834	0.00348432	0	0	0
2169540	Lysinibacillus sp. 2017	0	0.00348432	0	0	0
2582913	Luteithermobacter gelatinilyticus	0.000125834	0	0	0	0
1640	Listeria seeligeri	0.000125834	0	0	0	0
1637	Listeria	0	0.00348432	0	0	0
1618	Liquorilactobacillus mali	0.000251667	0	0	0	0
1613	Limosilactobacillus fermentum	0.000125834	0	0	0	0
2732163	Limnobacter sp. SAORIC-580	0.000125834	0	0	0	0
109328	Leptotrichia trevisanii	0.000125834	0	0	0	0
712357	Leptotrichia sp. oral taxon 212	0.000125834	0	0	0	0
157691	Leptotrichia shahii	0.000125834	0	0	0	0
554406	Leptotrichia hongkongensis	0.000251667	0	0	0	0
40542	Leptotrichia buccalis	0	0.00348432	0	0	0
28184	Leptospira weilii	0.000125834	0	0	0	0
408139	Leptospira kmetyi	0	0.00348432	0	0	0
1588	Lentilactobacillus hilgardii	0	0.00348432	0	0	0
2746060	Legionella sp. PC1000	0.000251667	0	0	0	0
2005262	Legionella endosymbiont of Polyplax serrata	0.000125834	0	0	0	0
1867846	Legionella clemsonensis	0	0.00348432	0	0	0
28082	Legionella anisa	0.000125834	0	0	0	0
1467	Lederbergia lentus	0.000125834	0	0	0	0
29546	Lawsonia intracellularis	0.000125834	0	0	0	0
1382	Lancefieldella parvula	0	0.00348432	0	0	0
1366	Lactococcus raffinolactis	0.000125834	0	0	0	0
1358	Lactococcus lactis	0.000251667	0	0	0	0
1363	Lactococcus garvieae	0.000251667	0.00348432	0	0	0
1357	Lactococcus	0.000125834	0.00348432	0	0	0
227945	Lactobacillus ultunensis	0	0.00348432	0	0	0
267818	Lactobacillus kefiranofaciens	0.000125834	0	0	0	0
109790	Lactobacillus jensenii	0.000125834	0	0	0	0
1579	Lactobacillus acidophilus	0.000125834	0	0	0	0
1589	Lactiplantibacillus pentosus	0.000251667	0	0	0	0
1597	Lacticaseibacillus paracasei	0.000125834	0	0	0	0
1750719	Kurthia sp. 11kri321	0.000880836	0	0	0	0
57493	Kocuria	0.000251667	0	0	0	0
244366	Klebsiella variicola	0.000251667	0	0	0	0
1463165	Klebsiella quasipneumoniae	0.000125834	0	0	0	0
570	Klebsiella	0.000125834	0	0	0	0
2487074	Kaistella daneshvariae	0.000125834	0	0	0	0
946432	Jeotgalicoccus [Micrococcus] candicans	0.000125834	0	0	0	0
1903686	Jeotgalibaca sp. PTS2502	0.000125834	0	0	0	0
2808899	Janthinobacterium sp. PLB02	0.000125834	0	0	0	0
55508	Janthinobacterium agaricidamnosum	0	0.00348432	0	0	0
1297617	Intestinimonas butyriciproducens	0	0.00348432	0	0	0
2714932	Hymenobacter sp. HDW8	0.000125834	0	0	0	0
2675877	Hymenobacter sp. BRD67	0	0.00348432	0	0	0
2724192	Hymenobacter russus	0.000125834	0	0	0	0
2184519	Hydrogenophaga sp. NH-16	0.000125834	0	0	0	0
47421	Hydrogenophaga pseudoflava	0.000125834	0	0	0	0
47420	Hydrogenophaga	0.000125834	0	0	0	0
244596	Hoeflea phototrophica	0.000125834	0	0	0	0
341045	Herbaspirillum hiltneri	0.000251667	0	0	0	0
217	Helicobacter mustelae	0.000125834	0	0	0	0
213	Helicobacter cinaedi	0.000125834	0	0	0	0
1498	Hathewaya histolytica	0.000125834	0	0	0	0
2562282	Halomonas sp. Y2R2	0.000125834	0	0	0	0
2745	Halomonas	0.000125834	0	0	0	0
97084	Halobacteriovorax marinus	0.000125834	0	0	0	0
80816	Haliangium ochraceum	0.000125834	0	0	0	0
158327	Hahella chejuensis	0.000125834	0	0	0	0
712310	Haemophilus sp. oral taxon 036	0.000125834	0	0	0	0
727	Haemophilus influenzae	0.000251667	0	0	0	0
1549855	Haematospirillum jordaniae	0.000125834	0	0	0	0
1556	Gottschalkia acidurici	0.000125834	0	0	0	0
1434191	Glycocaulis alkaliphilus	0.000125834	0	0	0	0
442	Gluconobacter oxydans	0.000125834	0	0	0	0
1188228	Gloeomargarita lithophora	0.000125834	0	0	0	0
2527964	Gimesia aquarii	0.000251667	0	0	0	0
2527973	Gimesia alba	0.000125834	0	0	0	0
35554	Geobacter sulfurreducens	0.000125834	0	0	0	0
33938	Geobacillus thermocatenulatus	0.000125834	0	0	0	0
1379270	Gemmatimonas phototrophica	0	0.00348432	0	0	0
1617448	Geminocystis sp. NIES-3709	0.000125834	0.00348432	0	0	0
669359	Geminocystis herdmanii	0	0.00348432	0	0	0
84135	Gemella sanguinis	0.000125834	0	0	0	0
1379	Gemella haemolysans	0.000125834	0	0	0	0
2702	Gardnerella vaginalis	0.000125834	0	0	0	0
2701	Gardnerella	0.000125834	0	0	0	0
860	Fusobacterium periodonticum	0.000125834	0	0	0	0
2774151	Frigoriglobus tundricola	0	0.00348432	0	0	0
106370	Frankia casuarinae	0.000125834	0	0	0	0
1547445	Francisella sp. FSC1006	0.000125834	0	0	0	0
657445	Francisella noatunensis	0.000125834	0	0	0	0
2739062	Flavobacterium sp. M31R6	0.000125834	0	0	0	0
2478552	Flavobacterium sp. 140616W15	0.000125834	0.00348432	0	0	0
2172098	Flavobacterium pallidum	0	0.00348432	0	0	0
2162713	Flavobacterium magnum	0.000125834	0	0	0	0
312277	Flavobacterium indicum	0.000251667	0	0	0	0
683124	Flavobacterium haoranii	0.000125834	0	0	0	0
1191459	Flammeovirga sp. MY04	0.000377501	0	0	0	0
2594003	Ferrovibrio terrae	0.000125834	0	0	0	0
1389960	Exiguobacterium sp. S3-2	0.000125834	0	0	0	0
360911	Exiguobacterium sp. AT1b	0.00100667	0	0	0	0
332410	Exiguobacterium sibiricum	0	0.00348432	0	0	0
340146	Exiguobacterium mexicanum	0.000125834	0	0	0	0
2041044	Eubacterium maltosivorans	0.000125834	0.00348432	0	0	0
29322	Eubacterium [Eubacterium] cellulosolvens	0	0.00348432	0	0	0
1648	Erysipelothrix rhusiopathiae	0.000125834	0	0	0	0
2681984	Erwinia sp. J780	0.000125834	0.00348432	0	0	0
1241981	Epilithonimonas Chryseobacterium lactis	0.000125834	0.00348432	0	0	0
2762277	Entomobacter blattae	0.000125834	0	0	0	0
1353	Enterococcus gallinarum	0.000125834	0	0	0	0
1350	Enterococcus	0.000125834	0	0	0	0
1531	Enterocloster clostridioformis	0.000125834	0	0	0	0
69218	Enterobacter cancerogenus	0.000125834	0	0	0	0
423605	Elusimicrobium minutum	0	0.00348432	0	0	0
2575699	Elizabethkingia sp. 2-6	0.000377501	0	0	0	0
172045	Elizabethkingia miricola	0.000125834	0	0	0	0
238	Elizabethkingia meningoseptica	0.000251667	0	0	0	0
308865	Elizabethkingia	0.000125834	0	0	0	0
2486578	Ehrlichia Rickettsiales endosymbiont of Stachyamoeba lipophora	0.000125834	0	0	0	0
945	Ehrlichia chaffeensis	0.000125834	0	0	0	0
390884	Echinicola vietnamensis	0.000125834	0	0	0	0
1089444	Dickeya solani	0.000125834	0	0	0	0
58138	Desulfofarcimen acetoxidans	0.000125834	0	0	0	0
2291	Desulfobacter hydrogenophilus	0.000125834	0	0	0	0
1299	Deinococcus radiodurans	0.000125834	0	0	0	0
502394	Deinococcus gobiensis	0.000125834	0	0	0	0
197162	Deferribacter desulfuricans	0.000125834	0	0	0	0
142864	Cylindrospermum stagnale	0.000125834	0.00348432	0	0	0
320787	Cyclobacterium amurskyense	0	0.00348432	0	0	0
379064	Cyanobacterium aponinum	0.000125834	0.00348432	0	0	0
1844971	Curvibacter sp. AEP1-3	0.000125834	0	0	0	0
313588	Croceibacter atlanticus	0.000125834	0	0	0	0
241425	Crinalium epipsammum	0.000125834	0	0	0	0
2054173	Coxiella Candidatus Coxiella mudrowiae	0.000125834	0	0	0	0
35	Corallococcus macrosporus	0.000125834	0	0	0	0
1816219	Colwellia sp. PAMC 21821	0.000125834	0	0	0	0
641107	Clostridium sp. DL-VIII	0	0.00696864	0	0	0
755731	Clostridium sp. BNL1100	0.000125834	0	0	0	0
182773	Clostridium isatidis	0	0.00348432	0	0	0
1703250	Citrobacter sp. CRE-46	0.000125834	0	0	0	0
2594269	Chryseobacterium sp. SNU WT5	0.000251667	0	0	0	0
1493872	Chryseobacterium shandongense	0	0.00348432	0	0	0
558152	Chryseobacterium piperi	0.000125834	0	0	0	0
112234	Chryseobacterium joostei	0.000125834	0	0	0	0
1265445	Chryseobacterium camelliae	0.000125834	0	0	0	0
246	Chryseobacterium balustinum	0.000125834	0	0	0	0
100716	Chloroherpeton thalassium	0	0.00348432	0	0	0
1457153	Chlamydia gallinacea	0.000125834	0	0	0	0
2203219	Chitinophaga alhagiae	0.000125834	0	0	0	0
2049305	Changchengzhania lutea	0	0.00348432	0	0	0
979	Cellulophaga lytica	0.000125834	0	0	0	0
1397108	Celeribacter marinus	0.000125834	0	0	0	0
1848904	Capnocytophaga stomatis	0.000125834	0	0	0	0
1945657	Capnocytophaga sp. H2931	0	0.00348432	0	0	0
1017	Capnocytophaga gingivalis	0	0.00348432	0	0	0
28189	Capnocytophaga cynodegmi	0.000251667	0	0	0	0
28188	Capnocytophaga canimorsus	0.000125834	0	0	0	0
2732590	Candidatus Vesicomyosocius sp. SY067_SCS001	0.000125834	0	0	0	0
2508687	Candidatus Thioglobus sp. NP1	0.000125834	0	0	0	0
1410383	Candidatus Tachikawaea gelatinosa	0.000251667	0	0	0	0
336810	Candidatus Sulcia muelleri	0.000125834	0	0	0	0
2601646	Candidatus Sneabacter namystus	0.000125834	0	0	0	0
401619	Candidatus Riesia pediculicola	0.000125834	0	0	0	0
69896	Candidatus Phytoplasma solani	0.000125834	0	0	0	0
35773	Candidatus Phytoplasma luffae	0.000125834	0	0	0	0
59748	Candidatus Phytoplasma australiense	0.000125834	0	0	0	0
1977865	Candidatus Pelagibacter sp. RS40	0.000125834	0	0	0	0
1977864	Candidatus Pelagibacter sp. RS39	0.000125834	0	0	0	0
1388755	Candidatus Pelagibacter sp. HIMB1321	0.000125834	0	0	0	0
91604	Candidatus Paracaedibacter acanthamoebae	0.000125834	0	0	0	0
553981	Candidatus Nitrosacidococcus tergens	0	0.00348432	0	0	0
1778264	Candidatus Mikella endobia	0.000125834	0	0	0	0
1581557	Candidatus Methylopumilus planktonicus	0.000125834	0	0	0	0
168169	Candidatus Ishikawaella capsulata	0	0.00348432	0	0	0
206	Campylobacter sputorum	0.000125834	0	0	0	0
1660073	Campylobacter sp. RM6137	0	0.00348432	0	0	0
204	Campylobacter showae	0.000125834	0	0	0	0
488546	Campylobacter peloridis	0.000125834	0	0	0	0
198	Campylobacter hyointestinalis	0.000251667	0	0	0	0
1448857	Campylobacter corcagiensis	0.000251667	0	0	0	0
477976	Calditerrivibrio nitroreducens	0.000125834	0	0	0	0
2806205	Caldicellulosiruptor sp. YA01	0.000125834	0	0	0	0
717609	Caldicellulosiruptor obsidiansis	0.000251667	0	0	0	0
1222016	Caldicellulosiruptor changbaiensis	0.000125834	0	0	0	0
1636423	Burkholderia sp. MSMB1588	0	0.00348432	0	0	0
337	Burkholderia glumae	0.000125834	0	0	0	0
2806552	Bulleidia sp. zg-1006	0.000125834	0	0	0	0
271865	Brucella [Ochrobactrum] quorumnocens	0.000125834	0	0	0	0
2756	Brochothrix thermosphacta	0.000251667	0	0	0	0
2057741	Bradyrhizobium sp. SK17	0.000125834	0	0	0	0
114615	Bradyrhizobium sp. ORS 278	0.000125834	0	0	0	0
1404864	Bradyrhizobium cosmicum	0.000125834	0	0	0	0
1792307	Bosea sp. PAMC 26642	0	0.00348432	0	0	0
29519	Borreliella garinii	0.000125834	0	0	0	0
1964448	Borreliella Candidatus Borrelia tachyglossi	0.000125834	0	0	0	0
64895	Borreliella	0.000125834	0.00348432	0	0	0
144	Borrelia coriaceae	0.000125834	0	0	0	0
1303590	Bombilactobacillus bombi	0.000125834	0	0	0	0
33035	Blautia producta	0	0.00348432	0	0	0
1322	Blautia hansenii	0.000125834	0	0	0	0
1912897	Blautia argi	0	0.00348432	0	0	0
624186	Blattabacterium sp. (Blattella germanica)	0	0.00348432	0	0	0
1186051	Blattabacterium sp. (Blaberus giganteus)	0.000125834	0	0	0	0
164514	Blattabacterium punctulatus	0.000125834	0	0	0	0
2316383	Biomaibacter acetigenes	0.000125834	0	0	0	0
999	Bernardetia litoralis	0.000125834	0	0	0	0
1585976	Bergeyella cardium	0.000125834	0.00348432	0	0	0
33047	Bartonella vinsonii	0.000125834	0	0	0	0
85701	Bartonella tribocorum	0.000125834	0	0	0	0
2759660	Bartonella sp. HY038	0.000125834	0	0	0	0
56426	Bartonella clarridgeiae	0.000125834	0	0	0	0
773	Bartonella	0.000125834	0	0	0	0
397865	Barnesiella viscericola	0.000125834	0	0	0	0
2650157	Bacteroides sp. HF-5287	0.000125834	0	0	0	0
2650158	Bacteroides sp. HF-5141	0	0.00348432	0	0	0
1796613	Bacteroides caecimuris	0.000125834	0.00348432	0	0	0
72361	Bacillus vallismortis	0	0.00348432	0	0	0
2779776	Bacillus sp. HD4P25	0.000251667	0	0	0	0
561879	Bacillus safensis	0.000125834	0	0	0	0
2026190	Bacillus mobilis	0.000125834	0	0	0	0
1783501	Bacillus freudenreichii	0.000125834	0	0	0	0
580165	Bacillus cytotoxicus	0	0.00348432	0	0	0
1441386	Athalassotoga saccharophila	0.000125834	0	0	0	0
147317	Arthrospira sp. PCC 9108	0.000377501	0	0	0	0
118562	Arthrospira platensis	0.0247892	0	0	0	0
35823	Arthrospira	0.192777	0.00348432	0	0	0
1670	Arthrobacter citreus	0	0.00348432	0	0	0
616991	Arenibacter algicola	0.000251667	0	0	0	0
2593672	Arcobacter sp. FWKO B	0.000125834	0	0	0	0
913109	Arcobacter ellisii	0	0.00348432	0	0	0
873191	Arcobacter defluvii	0.000125834	0	0	0	0
2341117	Arachidicoccus soli	0.000125834	0	0	0	0
2656760	Apibacter sp. B3706	0.000125834	0	0	0	0
2585771	Antarcticibacterium arcticum	0.000125834	0	0	0	0
33934	Anoxybacillus flavithermus	0.000125834	0	0	0	0
1870984	Anaerococcus mediterraneensis	0.000125834	0	0	0	0
109266	Anabaenopsis circularis	0.000125834	0	0	0	0
1603	Amylolactobacillus amylophilus	0	0.00348432	0	0	0
194196	Alysiella filiformis	0.000125834	0	0	0	0
2267264	Alteromonas sp. RKMC-009	0.000251667	0	0	0	0
589873	Alteromonas australica	0.000125834	0	0	0	0
226	Alteromonas	0.000125834	0	0	0	0
2604537	Altererythrobacter sp. BO-6	0	0.00348432	0	0	0
79885	Alkalihalobacillus pseudofirmus	0.000251667	0	0	0	0
2598861	Alkalihalobacillus miscanthi	0.000125834	0.00348432	0	0	0
328814	Alistipes shahii	0	0.00348432	0	0	0
40269	Aliivibrio salmonicida	0.000125834	0	0	0	0
471514	Alicyclobacillus ferrooxydans	0.000125834	0	0	0	0
2772483	Algoriphagus sp. Y33	0.000125834	0	0	0	0
2686365	Algibacter sp. L1A34	0.000125834	0	0	0	0
239935	Akkermansia muciniphila	0.000125834	0	0	0	0
359	Agrobacterium rhizogenes	0	0.00348432	0	0	0
1737490	Agarilytica rhodophyticola	0.000125834	0	0	0	0
644	Aeromonas hydrophila	0.000125834	0	0	0	0
87541	Aerococcus christensenii	0.000125834	0	0	0	0
675090	Actinomyces weissii	0.000125834	0	0	0	0
2662362	Acinetobacter wanghuae	0.000125834	0.00348432	0	0	0
2601122	Acinetobacter sp. YH12138	0.000125834	0	0	0	0
1879049	Acinetobacter sp. WCHAc010034	0.000125834	0	0	0	0
2545797	Acinetobacter sp. FDAARGOS_724	0.000125834	0	0	0	0
1530123	Acinetobacter seifertii	0.000125834	0	0	0	0
1789224	Acinetobacter larvae	0	0.00348432	0	0	0
70348	Acinetobacter dispersus	0.000125834	0	0	0	0
106648	Acinetobacter bereziniae	0.000251667	0	0	0	0
2714923	Acidovorax sp. HDW3	0.000125834	0	0	0	0
2478662	Acidovorax sp. 1608163	0	0.00348432	0	0	0
1765967	Acidihalobacter ferrooxydans	0.000125834	0	0	0	0
1353889	Achromobacter pestifer	0.000125834	0	0	0	0
2148	Acholeplasma laidlawii	0.000125834	0	0	0	0
2184575	Acetobacterium sp. KB-1	0.000125834	0	0	0	0
104102	Acetobacter tropicalis	0.000125834	0	0	0	0
481146	Acetobacter ascendens	0	0.00348432	0	0	0
435	Acetobacter aceti	0.000251667	0	0	0	0
434	Acetobacter	0.000125834	0	0	0	0
1720083	Acetilactobacillus jinshanensis	0.000125834	0	0	0	0
2675797	Enterobacteriaceae endosymbiont of Plateumaris sericea	0.000125834	0	0	0	0
2675792	Enterobacteriaceae endosymbiont of Neohaemonia nigricornis	0.000125834	0	0	0	0
2675790	Enterobacteriaceae endosymbiont of Macroplea appendiculata	0.000125834	0	0	0	0
2675787	Enterobacteriaceae endosymbiont of Donacia tomentosa	0.000125834	0	0	0	0
2675779	Enterobacteriaceae endosymbiont of Donacia marginata	0.000125834	0	0	0	0
