# Supplementary material for: Gut microbial dysbiosis in antibiotic treated Mystus cavasius using a combined culture-dependent and shotgun metagenomic approach
Source: Research Square preprint supplement (doi:10.21203/rs.3.rs-7024597/v1), 2025-07-21
Supplement: Supplementary file 4 [file e74b0eea37893941ccb6aa1e.docx]

**Supplementary Table S1:** The fish feed ingredients used in the 90-day experiment of oxytetracycline exposure.

| **Sl.** | **Ingredients** | **Quantity for 1 Kg feed** |
| --- | --- | --- |
| **1.** | Spirulina powder | 39g |
| **2.** | Mustard Oil Cake | 90g |
| **3.** | Soybean | 90g |
| **4.** | Fishmeal | 90g |
| **5.** | Rice Bran | 228g |
| **6.** | Wheat | 228g |
| **7.** | Corn | 225g |
| **8.** | Fish Oil | 5ml |
| **9.** | Vitamins and Minerals | 5g |
| **10** | Antibiotic powder (variable) | 2-9g (adjusted with rice bran) |
|  | Total | 1000 g (1kg) |
